# Supplementary material for: Analysis and Identification of Chemosensory Genes in the Transcriptome of Adult Rhoptroceros cyatheae
Source: Research Square preprint supplement (doi:10.21203/rs.3.rs-7729120/v1), 2025-11-24
Supplement: Supplementary file 1 [file 2aec0ec2f62b3a81eafc53b0.docx]

Supplementary Data S1. The amino acid sequences of odorant binding proteins (OBPs) from 11 Hymenoptera species.

>BdioOBP1

MKIQVTIISVVVVCFALVNRTYAGITRAQMEGLAKGFRSTCVRKVHADIALVAGLRDGQFVEGNYPLKCYTKCIMSLMKTLKNNKADVSAISKQIKAMASDDVADRLVDAAQKCYTEINDKDICEYTWRYTICTYKADPDAFFFP

>BdioOBP2

MNAVAIVFAVCLAGVSAGMIERAQLLPEPNITKECLKEYGIDYDRTTETPLTDEEIYCIPACAYRDYGIMRPDGTINTEKAESYFGPEDGEERDIFFSVYEACREGKTHCKLVQCMFGQLKNHWKISTESNKITKQLFSQLA

>BdioOBP3

MAQNIVGYQRNIDEMKTYLYVVAVLFSIIALVQCDDDDSLVSKVQNCAEQFSLTKAEFIELVSSQSLAFDNSNFRCVLACLLKKDDRLKDGKVSVDKEMDALEETSPDETEESLREKVTDCANKGKYANFYFLNFLQTFVQ

>BdioOBP4

MNTLTLFLLLCAIVAMGVQANIPKSRFNPELKNVWDKCTKEAKLTEAELDIVLQNYSKITDQRVKCLKGCLFKSLHVINAENQIDEAAAQKYYEGVGTKKDTINEAIQKCIPKATGNDQCDIAQSFESCLCSEYIKCS

>BdioOBP5

MKNVALCLLVLVFGAVKIHAGEVPKEIAHMVADVREKCHRETGVDIEHVDRTVEGYFHPSETLGCYFSCIFGHFDLLDHNGHIDFDKIISKIPDSFKEHGMEMINACRHLTGNNPCDMALNVVQCFQKTNPEKYFVI

>BdioOBP6

MNSYLLLLILGVVYAKNAQAASSVTQALLEIKASVDKCGKEAGFNEEQLNNALKNYEKNADHKVKCFRGCLLKAHKVITDEEKIDENAAIKYYHGDKLEPLKVVIQKCVADSVIGGDHCDLAHNLESCMCSSLTTC

>BdioOBP7

MKIIFVLLVFCLAVVLAWPDEDEDELTESAEADEEIKASAFKDCWKKKKLTEKQMEDIKNWGCIIACVHTKIGFINADGSLNVERITQRNPGIREEIQEIYQTCVKYAKGDPCQLSLCLEGQNFDKNVSYDDSSY

>BdioOBP8

MKSFVVVFAFCIVGALAGLTDEQKAKLKEHRVACVAETGVSDDVIEKAKKGEPVVYDEKLNCFAACMLKKAGIMKADGTIDEAVARAKLPKDIPQEKVDQVINMCKTQVGKDACETGGKVMSCLAKTKAVTLLN

>BdioOBP9

MKLILSTFCVIFVVVQNAQGNDESMKSLEECLDENDIKDDFTKLKEHDDPKLRCIMACVMEKEGILKNGEVKLDKLKKDLLEDAEQLGEKKVSEIVNYCGNLAKDLMDVCDKSNLIGLCIKEEFAKYNINFEK

>BdioOBP10

MKVYLCIASLLSALVLIQCNKIPPELKNKVDGCLKEFELTEESLKTPDFEDSKIKCFGACFLKSDDRMTEGKVSIDKEMDAATKYLEKDKIDDTLKDKITECVNKANEEKDDCAVAGTLYKCVYEKFGPLEV

>BdioOBP11

MRTTQEISTSAPNHERVDDVDLNDSIDQCAGLIGLLVEETRKSFTMPLEAPGNCVMACVWDKIGMMDIDGKIIKEEMVSSIHPTLQLLPNITRVTEDDFYACVDEANQFSDPCAVVSEYFKCLIKDLFMHNT

>BdioOBP12

MKIYLCIAGLFCALVLVKSEPPAEVKKIFEECEKEIGVTKESIRGPQHADDPKAKCFYACIMKKDGTMVDGKVVAEKAIEVEANFKPDGANDSINEEFTECANKANEQKDECEVAGAFFKCLKKHDHHGKRE

>BdioOBP13

MKIHFYLAGILSAFMIVKCEMDPEMKEKFDECREEFGISEESLESPDFEDPKVKCFAACFMQKDDRLTHGKLSIDKELKAAEKYIKKEKIDDSFKDKITECVKKANEEKDDCGVSGALFKCIDDTFGPFTP

>BdioOBP14

MATLPNFNATFWFVVFSIFSVVILIDCKPNFYEQCLRESAVAKGTNATQIFINIDDPKLSCLNACIFKKFSMMKNGKFDAEITFNFLKKSYPKPLSNLRERINDCVLKANEFNDECEAGNTMKKCLTTNS

>BdioOBP15

MKSSLCIAGILYVLVLVQCEIVSEFKSILDECQKEFQLSEESLISPNFEDNKINCFAACVMKKDDRLTEGKISVDKEVATAPKYMADRIDDSLKDKMTECVDKANEEKDDCAVSGTFYQCLIEKFGPFHP

>BdioOBP16

MKAFAVVLAVVLAVACADDPLKDIPKDLIKTCLTENGFDAAQYPNGLRNVKIPDNQEKNRDCYYACMMKKMNLMKPDGMLMEDNLKTKFNMNLETLQKAMNTCKTQVKGNDSCKLAACLMANRGI

>BdioOBP17

MKILLAVLLFCIVVAYCDRTMFASNRIMEDCAQRHKIDKLILFELKRNRTFGATTDTQCFAGCVLKQVGIMSDDGTVDQDFIDSPMADRCKNWFFAFGKDQCEIAAKILGCLSQKHVIVFSDD

>BdioOBP18

MKLFVVVALCTVVTIVNGLTDEQKAKLREDRAACVAETGVSDDVVTKLKQGENVVFDEKLNCFSACMLKKIGVMRPDGSIDEQAARAKVPKEVPQDKVDLVINMCKALGIMKIIISKIEVNE

>BdioOBP19

MKLIFILIACCLAVTVAWSGKDEDRVREKAMEECRQEKKLTVDEAMNPSNLGCMYACMHKKIGYLNADDTLNIERVTHGNPNTRFREVVRGVYQECVKNGKGDACQVSLCLENTKVA

>BdioOBP20

MEKMSEGFRRTCVSKTGADMNLIAGIRNGNFIDDPAARCYTKCIMALMKTLTKQGQIDADMMVKQINIMASPDIAPSMVAGVRKCYSEVTASEPCDLAWLFTKCIHDADPSTFFFP

>BdioOBP21

MKFMWAVFICCLAVTLADFEEDEFEERRKALQECREEMKLIRDNELASNEGCLYACVHKKLKFFNPDGTLNIDVAIHDGLEPDLQEKVQTAYRACVENAKGDACKVSFCLENLEI

>BdioOBP22

MINKKLSTDAVTAIIKGGEIKRDEKLDCFSACMLKKIGVMRADGTIDVDASREKARTTNVDVAKADKIIDKCKDLIGKNTCETGGNVFGCFIVGKDFPVLD

>BdioOBP23

MTALIEKAKKQFKEEGKVELDENMSCFSACMFKKIGFMDEEGKLDEEMVRALTADQFPEDQLDAAIGACKDEAGKNDCETAGKLVACFMKQGIAVNS

>BdioOBP24

MGVTKESLKLLKDQNDPNTWCIFACAMEKKGLMVNGKAVTEKVIEDISQDMPEKVKEVIRANAPACVEEANKENNECAVFMVLRNCLAEKNLSRK

>BdioOBP25

MQLPSLVLFLVLPLLLLAHAKAGTRPSFVSDKMIATAASVVNACQTQTGVTTGKSSSYLPLAFSFFVLSLAPARAPFLPSFQL

>AmelOBP1

MASNTKQAFIYSLALLCLHAIFVNAAPDWVPPEVFDLVAEDKARCMSEHGTTQAQIDDVDKGNLVNEPSITCYMYCLLEAFSLVDDEANVDEDIMLGLLPDQLQERAQSVMGKCLPTSGSDNCNKIYNLAKCVQESAPDVWFVI

>AmelOBP2

MNTLVTVTCLLAALTVVRGIDQDTVVAKYMEYLMPDIMPCADELHISEDIATNIQAAKNGADMSQLGCLKACVMKRIEMLKGTELYVEPVYKMIEVVHAGNADDIQLVKGIANECIENAKGETDECNIGNKYTDCYIEKLFS

>AmelOBP3

MKTIVILLFTLCIVSYMMVRCDDITLCLKQENLNLDDIDSLLEDESERMLRKRGCIEACLFHRLALMNDNVFDVSKFDVYLNDTDMDMDLKDSIRKIIRQCVDNAKNEDKCLTAQKFSRCVIDYVKFHITQYMISNANSNTTSEEESSDNST

>AmelOBP4

MKITIVSLLCVIYCALVHADTVAILCSQKAGFDLSDLKSMYESNSEEQMKKLGCFEACVFQKLHFMDGNTLNVEKLESGTRELTPDDFTEDVHEIIEQCVSKAADEDECMVARKYIDCALEKMKFLDDELEKIAGN

>AmelOBP5

MHVKSVLLLITIVTFVALKPVKSMSADQVEKLAKNMRKSCLQKIAITEELVDGMRRGEFPDDHDLQCYTTCIMKLLRTFKNGNFDFDMIVKQLEITMPPEEVVIGKEIVAVCRNEEYTGDDCQKTYQYVQCHYKQNPEKFFFP

>AmelOBP6

MKGLGVSLLVALLLVLLAIEDTMSKKMTIEEAKKTIKNLRKVCSKKNDTPKELLDGQFRGEFPQDERLMCYMKCIMIATKAMKNDVILWDFFVKNARMILLEEYIPRVESVVETCKKEVTSTEGCEVAWQFGKCIYENDKELYLAP

>AmelOBP7

MKKFLVIFVYILSVAVIIRANGINEILKIMAVSMKDIRYCIIHMGLTFKDFIKMQELLQEEDISEGNIKKYLTNYSCFITCALEKSHIIQNDEIQLDKLVEMANRKNISIDVKMLSECINANKSTDKCENGLNFIICFSKLLSDMYEDTFEDTLKHKSYV

>AmelOBP8

MTIEELKKTIKNLRKVCSKKNDTPKELLDGQFRGEFPQDERLMCYMKCIMIATKAMKNDVILWDFFVKNARMILLEEYIPRVESVVETCKKEVTSTEGCEVAWQFGKCIYENDKELYLAP

>AmelOBP9

MFKNYHFFFILVITLIFLYFGEADIKKDCRKESKVSWAALKKMKAGDMEQDDQNLKCYLKCFMTKHGILDKNAEVDVQKALRHLPRSMQDSTKKLFNKCKSIQNEDPCEKAYQLVKCYVEFHPEVLQTVPFL

>AmelOBP10

MKYSILLSLLITCLICSPSVHCGTRPSFVSDEMIATAASVVNACQTQTGVATVDIEAVRNGQWPETRQLKCYMYCLWEQFGLVDDKRELSLNGMLTFFQRIPAYRAEVQKAISECKGIAKGDNCEYAYRFNKCYAELSPRTYYLF

>AmelOBP11

MKAAEIWLVSLYWYLILQIALVYGEISDIDEFREMTSKYRKKCIGETKTTIEDVEATEYGEFPEDEKLKCYFNCVLEKFNVMDKKNGKIRYNLLKKVIPEAFKEIGVEMIDSCSNVDSSDKCEKSFMFMKCMYEVNPIAFIAP

>AmelOBP12

MLYNNLTIVIILIMCGVQNLRARSVNIFQDIADCVDRSNMTFHELKKLRDSSEARIKLINEEENFRNYGCFLACIWQQTGVMNGSELSTYNIAGIIEGQYHDDEDLKTFFHKIALTCEDDVHRKFLHVNDECDVALSFKLCMLKAMRNYP

>AmelOBP13

MKTIIFIFAFCLVGILAVSEESINKLRKIESVCAEENGIDLKKADDVKKGIFDKNDEKLACYVDCMLKKVGFVNADTTFNEEKFRERTTKLDSEQVNRLVNNCKDITESNSCKKSSKLLQCFIDNNLMKIFE

>AmelOBP14

MKTIVLIFGFCVCVGALTIEELKTRLHTEQSVCKTETGIDQQKANDVIEGNIDVEDKKVQLYCECILKNFNILDKNNVFKPQGIKAVMELLIDENSVKQLVSDCSTISEENPHLKASKLVQCVSKYKTMKSVDFL

>AmelOBP15

MKTILIISAICICVGALSIKDFQNAIRMGQSICMAKTGINKQIINDVNDGKINIEDENVQLYIECAMKKFSFVDKDGNFNEHVSREIAKIFLNENEINQLITECSAISDTNVHLKITKIFQCITKFKTINDILNS

>AmelOBP16

MKTFVIIFAICVCVGAMTHEELKTGIQTLQPICVGETGTSQKIIDEVYNGNVNVEDENVQSYVECMMKKFNVVDENGNFNEKNTRDIVQAVLDDNETDQLIVECSPISDANVHIKISKIFQCFMKYKTITDILNS

>AmelOBP17

MKTIVIISAICVCVSAMTLDELKSGLHTVQSVCMKEIGTAQQIIDDINEGKINMDDENVLLFIECTMKKFNVVDENANFNEKISSDIVRAVLNDNEADQLLAECSPISDPNALIKISKILECFFKYKTINQILNS

>AmelOBP18

MKTFVIISAICVCVGALTLEEFQIGLRAVVPICRIETSIDQQKEDDFRDGNIDVEDEKVQLFSECLIKKFNGYDDGGNFNEVVIREIAEIFLDENGVNKLITECSAISDADLAVKSAKLLKCIGKYKTLKEMLSG

>AmelOBP19

MKTIVVIFAFCICVNAMTIEELKIQLRDVQEICKAESGIDQQTVDDINEVNFDVEDEKPQRYNECILKQFNIVDESGNFKENIVQELTSIYLDENVIKKLVAECSVISDANIYIRFNKLVKCFGKYKTMKEVLNL

>AmelOBP20

MKTIVVIFAFCICVNAMTIEELKIQLHDVQEICKTESGIDQQTVDDINEVNFDVEDEKPQRYNECILKQFNIVDESGNFKENIVQELTSIYLDENVIKKLVAECSVISDANIYIRFNKLVKCFGKYKTMKEVLNL

>AmelOBP21

MKTIVIISAICVCVGALTLEELQIGLRAVIPVCRIDSGIDEKKEDDFRNGIIDVENEKVQLFSECLIKKFNAYDDGGNFNEVVVREIAEIYLDENEVNKLITECSAISDADIHLKSSKLIKCFAKYKTLKEIMNE

>CvesOBP6

MRSSIFVLVACALVVAVLGNEERRAKHKEIFEKCLKEVGIEKEDLHKAHEAHKNGEEPDQKIKCFEACLAKEMGTMVDGQFNKDKMLEKLPADIPDREKKVEAITKCSEEKGSDDCQTAYLVMKCMHDNKVLPPPPHHHHHHHHDQ

>CvesOBP18

MKVFAIVLAVCFVGALAELNDEQKAKLKEFRTHCVTETGVDESFIDKAKNGEWMMDDMKLRCFMKCMMMKIKVMKEDGTLDEEVTKKKMGNDLPADKIDEVMMKCKDMKGADTCETAMKMIKCYAEQKAFVSLTH

>CvesOBP15

MRVATGVLIAFVLAVGLFGDNSEARRLDIAKKCASETQLNEIPVKDIFSHGKEPNKKIKCFVACMAREDDVIVHGKFNKDKIFAAIPDDFPNRDKVVELLAKCSDEKGSDDCETAYLGVKCLHDNRIPLPFLLETGN

>CvesOBP10

MSKVYFCSLAVAFLFFALSNVDAKLSITQMRSIAKPWSQKCANKAGTSQELIEGHRRGEFPEDQTLMCYLLCNAKMAKIIDGNDKIDLVTVKQQLDIMAEQPDMERMMSAFKICADKMTATEPCRLAYDYSLCYYNMDPEIYMFS

>CvesOBP21

MKLKRADYNQTDQQLKCYLLCFMQKNGIFDKDDINVEKALRHLPRGVQGPSKKTLEYCKKIPSNDTCDKAFQLAKCYFKAQPEVLKTVSFV

>CvesOBP9

MSKVYFCSLAVAFLFFALSNVDAKLNTDQVRAMAKPWGNSCANKMGLRQELREAHARGEFPEDEDLMCYLQCNARAAKIMDKTNKIDMTTISTQLRLLVEEQSAERMVKVFQTCADRMTATEPCRLAYDFSKCYYEIDAETYMFP

>CvesOBP13

MAKFLLSFVNILLLVAYVHSGPVPEEFLDVQPTIRAACVKESGIASEDLINKAAKGEFTDDPQLKCYLKCIFDQFRLVSKRGINFDAMLALSPPSMKESATKMIKECRETKGKEGDLCDLSYEVTKCLYNSNPETYFIL

>CvesOBP1

MKNFIFSIGLLSIYFATTANSLLSETNLLQRASEDRERCLHLLSNETDGVNITQNSQNFRCYQTCIIKRGGYLQDGKISLEKYEKMMDSRMKRHKELHMNATKACIEEAEKGETECDVGVLFIACHRRQLFKQYRRNYARNFDENHHQQLTL

>CvesOBP4

MFKFVVLVALAVVSVNGLSQELKQQFLERLNKEGHECAAEVGASEDDVNELKAHKFPSRKEGECLILCLHKRFNMMHPDGTINTEGAIQTMQPLKADDPELYDKFMTIGRHCTEDVKIQDDKCRYATELVECAVKKGKEMGLDESIFE

>CvesOBP2

MATLTASVMGTAEVMSHVTAHFGKALEECREESGLSAEVLEEFQHFWREDFEVVHRELGCAIICMSNKFSLLQDDSRMHHVNMHDYIKSFPNGHVLSEKLVELIHNCEKKYDTMTDDCDRVVKVAACFKVDAKAAGIAPEVAMIEAVMEKY

>CvesOBP5

MTQIMSFLCFSIFSHRNGSIPLCSLSLPRVSLKHSLFVSFSFSWISSMEVSAQHSLFLLNLHLSELTASSSLLNRNVDGIGMSKLL

>CvesOBP19

MKSCKFAIVGILLTVVAKVHSDPELTSDTRDTVKGVIRSCSAKMSDENFIKMIQENDEHSMSIAAKCFAACALSHVGLMKDGKMHVNQIEDKLSSMIDTIKLCADEANKNANECVVVGKFGECLKEHDM

>CvesOBP11

MKQYLIAIFILCALIYEIRCDSNLITRKQIREVRKQCVDEVGLGRVIQDNPTRTNNSAEVHHTRKCVRACVAKKFGLINSEGKLDKEKFLERMIPKKDMLLYEKVSEAITTCADQQGNDICETHYLVMECMKGFRPFPRMRMNDI

>CvesOBP16

MHQFAVVLFFAAVIVTEAAITPEDLVKFGRARRDCDRSVPVDSSVIDRVIQGEMINDRQFFCYAACVVKELGLATADGSLMVDKVISKIPEGLPNRDAIVNAANECGTRKAADPCDTAQMVFNCFHEKNVPSLLMG

>CvesOBP14

MRVATLVLFACALAVGVLGEMPSEPERAEMMKKCMTESGIDESDTKNLFHMSQGEPSQKIKCFHACLSREMGVMVDGNINKDKAIEMLPADFPDREKTIEVFSKCSGEKGSDDCETVYLVFKCLRDNKIIPPPPPRPE

>CvesOBP8

MKTITLSVVGILLAAFMTVNADANTEMAEKIKKIFEGVVVACKDKITPENFVKLMQNPAAMSSNSELNCFKACAATHLELMKDGKLQVEKFEENVNSFLGDDKKEMAKTIIDATKSCVEEANQNENECDVAGKFEECMKKFNVPQL

>CvesOBP22

MNIAIVSTLIIAILNAGYFYHAEAVMTKEQIQKMMNSLGKTCASKSGVSPEMQEAHKRREFPEDRGLKCYFGCMVKMSKVDDPLILCSRSIKITKSMWMEQ

>CvesOBP3

MFRFIFLASAAFVAVNGLSQELKEKFMERLETVGGQCATDVGANEDDIAELIAHKYPSRHEGECMIFCFYKHFNMMHPDGSLDAEGAIKAMEPLKADDPDLYEKLMEVGKHCAETVKADDDKCKYAAQLAQCGTKKAAEMGIDGSILE

>CvesOBP7

MKYFALVFVGLLFTFSNGVSGEQEDCPLKKAVQASIEACKDKLTDDSLNLLKEDEGADNEEIRCFKACILKDSGIMEDGKIQVEKVKSALNEAIEKAEENKDKLEEMAKAIIEATEKCAEEAGKAENECEKAHLFVGCLKGYENQE

>CvesOBP12

MVRVILSCVFLGFLMQTSLVSAKLPDWVPPEIIEMAAGEKGRCMSEHGTTQGMIDQVNTGSIPNDPALTCYMFCLFESFSIIDEDGVLEYGMLLEMFPEEIKNKASDILGGCAEQAGADNCEKVYKIATCVQGKDPSMWFMI

>CvesOBP17

MKVLVPIFAICFVGVLSNIAEPDSNRRENLKQCVEESGVDQTAVDKLQDKVWEMDNKKLQCFSKCMMIKMGVINNDGTLNEEYIKKNMSDEFPEGKADEFIMKCKDPKGADACENSLLMLKCFFDNTVFTMHKNN

>CcunOBP1

TVIVSFLFCIATVLAELTEEQKEMIKPYKDACLAELKLDEAIIEQSKKEYLEQGKTEFSDQLNCFSACMFKKVGIMTEEGKFDEDMARALASGQFPEDEINKAINACKNEVGKDICETAGILFECFLKQRISV

>CcunOBP3

VICILILSVHIINEAHAGASREQMEKISEGFRKTCIGKTGADLAIVQEIRNGNFIVDPLAKCYTKCIMGLMKTLTKQGQIDAEMMIKQINIMVSPDIAGHMIAGVRKCHVEVSADEPCELAWLFTKCVHDENPEL

>CcunOBP4

LFVICCYCNFAAYSRNITFTNDELDENIQMCLAKTRLSQAFFKSGDENLKYLTEEQKSCFLACMFKKAGIITHDGSVRSVTEEMDIATANAIDRCQSLAEGNLCKLAWCLYKTDKFSIPVI

>CcunOBP5

MHSFTVIVVFCALFTKNALADSYNVELTEEDREIFKKCIKEGGLTKEELNAAVRNFDKNADRKVKCFRGCLLRSHKVIKDDNTIDGNAAVNYYHVEDVEPLKKLILKCSASTTGNDYCDVAQSVESCF

>CcunOBP7

MKFVIFSFFALFLAVRDIHGNDESIQNLKECLNENNIKVDIEKLKEHDDPKIRCILACVMEKEGILENGDIQYDLLKEDLLEDAEQLGEKKISEIVDYCGNLAKELTDVCDKTNLIGMCLEEELE

>CcunOBP8

ALLLLLFGLTNAKPGTRPSFVSDKMIATAASVVNACQTQTGVTTADIELVRNGQWPDSMELKCYMYCLWEQFGLIDEKRELSLNGMLTFFQRIPAYRNEVQQAISECKALGKYFATGDSCEYAYTFNKCYADRSPRT

>CcunOBP9

SFVIVFALCIAGAFAGLTDQQIVKLREYKIGCLAETGVSEDVVNKLKVGEAVVFDEKLNCFSACILKKVGIMRPDGSIDEQVARDKLPKDWPQDKVDHVVNACKVQVGKDSCETGGKVLGCLAKTRAIA

>CcunOBP10

KTFAIVLAVCLAVVYADDPLKDIPKDLIKTCLTENGFDAAQYPNGLRNVKVPDNQEKNRDCYYACMMKKMNLMKPDGMLMEDNLKSKFNLNLETLQKALNTCKAQVKGNDSCKLAACLMANRG

>CcunOBP11

TLLSMFLLFVSVSTTLASFSADIEISLYEYEDDCSKESGLGAADIEIIRKNHAVPDNEIASQWAKCMMQKHNVIKSDGTFNMDVKTIAIPADTDTVIRAFPICKNQIGKDMAGTARLMMNCYLSNSDGL

>CcunOBP12

MKNVVVCFIVIVFGAININAGEIPKEIAHMVADVREKCHRETGVDIEHVDRTAEGYFHPTETLGCYFSCIFGHFDLLDHNGHIDFDKIIPKIPESFKDHGMEMITACRHLTGKNPCDMAFNVVQCFQKTNPEK

>CcunOBP13

YCALVLLLCMQAILLVHAGPPDWISPEILEMVQSDKARCMGEHGTTEALIEEVNQGHLTDDRAITCYMYCLFEAFSLVDEDGELEVEMLVGFLPEHMQGVANELIDACAKEPGTDVCNKMYAVAKCVQQKRPDL

>CcunOBP14

ISVALFVVICIVGVYSHPHGEHGHKLTPEQIARIMADVEECARTNDIGHEVFEDLKAGKNPTPSRNLSCFSACVLKRNGVMNADGSTNHKPTDSDVAKECKDLRGDDDCETAGKIVSCLHKNNLI

>CcunOBP15

LLLALCVAICFAGVYCDTAPKPEEVQYVKDCASKNNMDQKMIDDLKMQKTFFASQAAMCFTHCVMHHNGMLDDEGNMTDMFKKIPEAAECQSMTGNDKCETAAKIMDCMVKKENAD

>CcunOBP16

MKVLLVLVCCLAVAMAQFSSDKQRASAMNECQEELKVPDSEVEDPSKLGCLYACMHKKVGYTDADGTYNLRKLAGSAYNQRFEEAAQRVMNMCAEQAKGDPCKMALCLE

>CcunOBP17

IVITILLVCATQFKIIECGKKMDIDGLKDMLKPMSKSCKTKTGVSDELIAGTANGIWPRERSLMCYFKCLAVMLKAMNKQGEITLREINRQLNILVIDELVPRMKQILEQCLATATPSDDACEYAFNLIVCGYKADPTL

>CcunOBP18

MQLFDVACILGIVVIINALSNEQRYDNYIAVLKNCLKELGLSEEVYAYASVINNTDGAYDKAKCADLCMFKALKIMKPDGHIDLEKALEHLLSGEPGVQRDIMKTNIETCSKKKEDNDCDTAHNMMTCAVG

>CcunOBP19

KSLVQIAPFVLILLSFETVNAKMTMDQIKNTLKPFKTSCLKKTGVDIDLVDGTKSGHFPEERSLMCFTKCVMQMMKVAKNGEILINAMMQQVDLMMPDEYVDEMKSIITNCGPEANTKDDGCESAFTFAKCFYQSNSDI

>CcunOBP20

MKRAFSVLCVFLILGYAYSIDLQFVSQMKECGSEMGFSPEQVMEMMAKNDGQVGCLRACVLEKLGALQNGNLDKNVLASLLEQNKDTIPNYEQIRANLDTCYGEVTSGGLTDQCQIGGKFSTCMQEHMTG

>CcunOBP21

AAIVFTLCSVGAFAGLIEGDVSPPKPNITKECLKEYGIDIEQTNGAPLSDEEIYCIPACAYKDYGIMRPDGTIDSDKAESYFGVNDHEERSIFFSVYEVCREGKTHCKLVQCMFDNLKNHWKSS

>CcunOBP22

LPVCLIFSVFCFSSAHALLTKEAIESLRTHQKYCVRTSGVSEDHVEMARLDRQIHEDEYQEKFAVCMLNKFNIMNTDGSINKDEISYVLLTDNPWSYQTAKDCTALVGSNVRETARKITNCLLQTDIIV

>CcunOBP23

CFAIVLALCVVGAYAATLSDEQKAKLKGFKEACITESGVNADLVNSIIKGGEIKRDKNLDCFSACMLKKIGIMRDDGTIDVETTRAKARTTSVDVAKADKIIDKCKELVGKDACETGGNVFGCFILGKDFP

>CcunOBP24

CIFVILVIAGCVYGDLSEDHREARKQRLDKCRKEMGITEENPLSRPPNLDDPKEKCFYACLMKESGKLVDGKMVAEKVLSAEKKRRPNYNDDIEAKLTYCVETANEQSDECEMAATMKKCTFEKLGPL

>CcunOBP25

MKLLLLTCSYLIICMKMSTSAPNHERVDDVDLNDSIDQCAAQIGLLIEETRRSFTMPIEAPGNCVMACVWDKIGLMDIDGKIIKEEMITSIHPTLELLPNITRVTEDDFYQCVDEANRFGDPCTVISEYFKCLIKDLF

>TpreOBP1

MKLKVSGSIIFILSIYLLNVQCAKMSLDELKKMVKPISSTCQKKNNVPQDLLLASYSGVFAREKSLMCYYRCLATMLKLMNKQGQFALDKMFTQVDLLVVEELAPRIKEIAKICFDSTPKIDDPCEYTYDLVVCAYNIDSSLQGILSKSQMKNR

>TpreOBP2

MTVRPRPRLGLGLLLGCYAISLVYAGTRPSFVSDKMIETASTVVNACQIQTGVTTADIESVRDGQWPESQELKCYMYCLWEQFGLVDEKNELSLNGMLTFFQRIPAYRNEVQNAINECKALGKYFATGDSCEYAYTFNKCYAERSPRTYYLF

>TpreOBP3

MRLSTTAMILSVFFISHIAVESKKMNIEELKKMSKPMMNSCQKKTGVKTEELEAAEKGTFPTGNKPLMCYFRCLAVMFKLTDKDGNISLHHLLHQIDLLVIDEIAAGVNDMLQFCFEHTPKLEDSCEYIYELVICMHKRNTEMNFFEGSLLS

>TpreOBP4

MRRFASFLALFAMVVLASGDMEQMKEAFKSCKAEVGIAEDTQMKDIPSSKVGCLHACVMKKFDNMKDGKVVVENILQRAEKKMNPLPEEMKEKLTKCADDANGKGDECEVASYMHECWWDSMKSMGPPKGPSN

>TpreOBP5

MQKIALCLAIFLVTYRVEAANEVPAEIRDLIAGVREKCHRETGVDIEHVDRTVEGYFHPSETLGCYFSCVFNQFNLLDHDGHLNFDEVLKRLEGLESFKEHGTEMIEKCRHLTGKNPCDSAFNLVQCFQQTNPEKFFVI

>TpreOBP6

MQPARVFSALAAILTFQALVVYAKRPEYITDEIMDMISNDKNRCMAEYGTTEALIDQVNDGHIPNDRAITCYMYCMFESFSLVDEDGEIEIEMLVGFIPEEFQEIAAELIEACATLPGEDVCDKMYKRSSCVQAKRPDLWFMV

>TpreOBP7

MYCTNRLFIAGAQAAALGHVSPVSESFYACLAESNLTKAQFIETLKSNDTEVAQCIASCTMEKEKFMTGEQIHENAIIKKMAEVSQEIGREAITYLVKVCAEEARELKGKCGVAHSVVRCIHDSLLAEGWI

>TpreOBP8

MKNTFFIGFCIFCIVCTGEVFSAATQEQMESMSNGLRRTCVNKLGITTADIEGIRGGNFVDSPGARCYIKCVMGLMKTFTKQGTIDIDVLVKQISIMTPSTIGKKLIEGAKTCYDEVSSDDPCELAWMFTKCTYLKGPDSFFFP

>TpreOBP9

MSVSTHLPIYVFFCSFVVLSSVANVRSAEAPKEIQGLIAGVREKCHRETGVDIEHVERTTDGHFHESEVLGCYFSCVFNSFDLLDHDGHMDFDKLLKKLPAVESFADHGAAMVAACRHITGANPCESAFKIMQCWQSTYPDKYFVI

>TpreOBP10

MYLIVGLVLVSCILHVHANEVPMEIKNLVAGIREKCHRETGVDIEHVDRTVEGYFHESEVLGCYFSCILNSFDLLDHDGHIDFDKLVVRLKGTDSFREHGMEMVAACRGTTGKNPCDSAFKVFQCFQKTNPAKYFVI

>TpreOBP11

MKTTLVFLAVCLAVTFASTLKDEQKAKLREFKEACIKESGVDAAVVDGIVKGGPITRGDKIDCFSACMLKKIGIMKPDGAIDVEAARGKVKTTNADPDKANKVIDACKDLVGKDACETGGNVFSCFITKKDFPVLD

>TpreOBP12

MKSFTFGLVLVVMGVCNAAEIPAEIKGMVAGLREKCHRETGVDIEHVDRTVDGYFHPSETLGCYFSCIFNAFDVLDKDGHVDWDKAITKLEAVESMKEHGMEMINACRTVTGKNPCDAAFNIVQCFHKTNPEKYFVI

>TpreOBP13

MKTAAFLLVVCFVAVFAEDPIKDQAVSKDLIKACLTENGFDAAQYPAGLRNAKVPENMEQKRNCYYACMMKKMNLMKTDGALNEENLRSKFSTNLETLNKAIDTCKAQGQNDFCKLASCMMANREI

>TpreOBP14

MVRVRLALVLAFLVSATVCHNITLTNDQLDTYIKTCLTKTRISQAFYKSDDENLKRLSERQKSCFLACMFKKSGIISDDGTVSSVTDDQEDSATNKAIKRCTKRAKGDICRLAWCLRKLEKFSLPIIVQKPRIVQY

>TpreOBP15

MKGILYLTITILCMHNVKAGEVPEEIKHLVVGLREKCHRETGVDIEHVDRTVEGYFHPSETLGCYFSCLFNSFDLLDHDGHLDWDKAISKLDAVGSLRDHAMDFINACRGTTGANPCESALNIVQCFQKAYPDKFFVI

>TpreOBP16

MKCIFTLTCLLVLTHTIHCEYEDTMFMDEMIKCAKEMGISADQLKEALETKNDEKLSCVNACAMKHLGTLSNGKIQKEKIFELIDKYADKIKDSDKLKEVVTSCADEVSSSGDMPECQLARKFTTCFENHFKV

>TpreOBP17

MKLFIEIFILAVAAFCLVTAGRPDFVTDEILEMVAGDKARCMNEHGTTESMIDAVNEGNIMNDRAITCYMYCLFEAFSLVDEDGILEVEMLVGFLPENMQASAETIVNSCIDESPGDVCDKMYATAKCIYDKRPDLWFML

>TpreOBP18

MKYLAVILAFCLAGAYAGLSDEQKAKLVEHRKVCVAETGLDPVVVENIKKGQPVQFDEKLSCFAACMLKRIGIMRPDGSMDEQVARAKLPKDLPKDKVDAVINSCKTQVGRNQCETGGKVLGCLLKTKAVSILA

>TpreOBP19

MKIKLATCIIILINLSAIDSKMTIEQLKNTMKPFKNTCLKKVADVDPVMVEGTKQGNFPDDPTLKCFFKCTLQMLKVLKNGELSVPAMMNQIDIMMSEELVDKTKAIVVDCDGKSKNLGDICERSFAFVKCFYEADSELYFFP

>TpreOBP20

MRLIVLFFICVLRVRADSNGSDLGSKDDDMVTCLINSGLDPGIYSGQKIGASAPTENQTNCYLACMFKKIGYMTKDGSIDVESILSTSHGLRKRAKARQRLDEIVNQCNMHAKDDVCKLARCFQDLRKSLLEKN

>TpreOBP21

MKNIVIIISLIVTAHAADHSLDKDELEVKEYFEQCLSEHGLKESDLEELKNKADPQILCITACVFEKQGLLMKNGEFNKKEIIKVEQEEDPNFKQDDFDEIFSFCEEKAKGIDDACLKGNTLTMCFLDEISQLDDKN

>TpreOBP22

MKFAVFTCLMVLLVVQHYPLVQCKKMNIEELKGFTKPLTKTCKTKTGISEATLAQIAKREFPPDPVLKCYFRCIAQMGKMMDKKGNLILENMIKQVELLIVDDISPRVKSVFTECFGEMTAEESCQLAFDFIMCIERIDQELNIIV

>MmedOBP1

MKNIIIFTTAITIFTFINFSQTEARMTMTQIRNAMKPLGKTCLGKTGLSKEVQAGQHNGEFPEDEALMCYHSCLLKLAKISDKSGNINLDTVHKQIDLMMPEDLIARAKAVTTDCFGEIKSTEICRMSFEFVKCYFIKGPEIVFFP

>MmedOBP2

MKSIIFLGVLLTVLISNKAEAKSVQKRECPFKKPFEANAPKCMDKISEENMGRMMQGNMDNDEIRCFVGCVFENAGFVKDNKVQMDKVREAVDNFVDDYKYSKEVGDQVYGVVSDCAPQAEKGANNCEVSSNLLICFKTNNKFT

>MmedOBP3

MRGSVLAIVACALVVGVLGDDDMKEKHKEIFKKCAEETGVTKEDLHNHKRGEEPETKIKCFHACIAKADGAMVDGKLNKDKVIEKIPADLPDRERIIEAVTKCSEQTAADECETAHLVFKCLRENKALPHPPHHHHHHHDE

>MmedOBP4

MKCFTLTAAGILFTVLITVNNASSNSNMEELVKKSMEETFKACKDKLTPENFALLNKDPHADNQEIKCFKACGMNHAGIMADGKIQIEKMEEKLNSLLGEDKKDFSKIIIGRAKPCVEEANKGENECDVAAGFEACVQKTINTKSDN

>MmedOBP5

MKNFVVIVILALYFTATTESLQEIMNTFQKARLEVRAPCLHLLSNETLTTLKTRRHLDNPEIRCFKACLMERQGYLKDNKIFIDEYEKLIDVNLKRIKELNMKFARACVNEAEKSENKCELAHNYNRCILHQTRKHYNQTAEENDENQNQHL

>MmedOBP6

MKNTLFFTLAAAFLLGYNIPHVESRMSMAQTINTMKPLGKTCAAKTGLSKEMQDGQHEGQFPEEEALMCYHTCLLKMAKVADKTGKLNIDAMVKQIDMLMPEDLVDKAKTACSGCADEVTATEGCRPSWEFMKCWYGRAPELYFFP

>MmedOBP8

MDSNIKYMCFLYIFIVVFMFFSEAIDQSDPHASTRKKCSGEFKLTDEILKLGEQDPSDFSCYLFCLFKDINIMNQKGEFDPNLAAQEVQDNLREAARKYIFMCYDLVKPNMTSDGCKNALEMVQCFKEKAPEMYEMLGLFHPPSNEPLKMTQ

>MmedOBP10

MAKFLLSSVGVLVLIAYVQSGPVPEEFKDVQPTIRAACVKESGLTNEELVNKAALGEFTDDPQLKCYLKCIFDQFRLVSKRGINFDAMLALSPPSMKENAIKMVKECRDTKGKEGDLCDLSFEVTKCLYNSNPETYFIL

>MmedOBP11

MKIFAVIFAICIVYAVAIGNLTEEERVELDRLANICVNETGFYEGHNSDDPAKNWISYGFKLQCYFSCMLKKMNIMNEDGTLNEEMIRKKIGDEVPADKIDAVITKCKDLKGANKCETATMIMKCYSDERLSLDPAEKSV

>MmedOBP12

MAIVRICNTTDPVDLRVLNDYLMNHNLNRLHIKSHHPLACFLLCVYSEFNWMDRHGGFKVHNIKAWMLRAELSENDTDILLRKCISLELTDPCTRAQYFTECFWTNHQDVTVDHRHSLHSIMHKDVHQDKIYN

>MmedOBP13

MKIIAVIFAVCFAGALAELTVEQLAKLREHSTACITETLVDDANVDAAMHHNIWRMDDLKLRCYFFCLLKKLKVMNEDGKLNEEITRQRLANLFPADRIDGVIMKCKEMKGADACETAILMAKCHADERGLLGPSPRSA

>MmedOBP14

MKGVKSIPLIAIAAVFCISINFFSTDAAFTVEQIESMMKPLGNNCVSKVGLSPELQEANRKKEFPEEKPFMCYLHCLARVTKVFDKNNQIDLEGTLKQVRLVMPDHLVEGSVKAYTVCSRAAISEDPCEKAFQYAKCYYETDAPSYFYP

>MmedOBP15

MKNILLGICIFIPSVFCGTRPSFVSDDVIGFAASGVNACQRQTGVATADIEAVRNGQWPESRQLKCYMYCLWEQFGLIDEKGELSLNGMLTFFQRIPAYRVEVQKAIRECKSIGEYLANGDNCQYAFTFNMCYAEVSPKTYYLF

>MmedOBP16

MKLFAVLFAVCFVGALAELTPEQLAKLHESRSTCITETGVEEGNVAKANDGEWLMDDLKLRCFFSCMLKKIKVLNEDGTFNEEKARKRIANDLPADKIDSVITKCKDLSGGDVCETAMLMMKCYADEKALTKIITEKSS

>MmedOBP17

MKIFAVIFAVCFVAALAELTEEQKAKLREHRTACVTETGVDEANVDAAKQGDWKMDDLKLRCFFACMMKKIKVMNEDGTLNEEITRKRMANDLPADKIDGVMMKCKDMKGADMCETAMMMMKCYADEKAFTKIITEKSS

>MmedOBP18

MRYSVFVFVGILFTFFISSDAESSGEKECPLKKAFQESIDACKDKLSEENLALLEKDENADNEDIRCFKACILNDSGVMSNGKIQIDKIEEAINAAIENVKEDEEKAKAIGESMINGAKNCAGPAEEGENECEVAHRFITCLMEHAAEEKKKHNE

>MmedOBP19

MYRLAVVFIFASVVVLSESAITAEDLVKFGMARRTCDRTNRVDPSVIDRVLQGEMINDPQFDCHVACVLKELNLLTADGSLNVEVAASKVPENLPYYNQLVGAIRSCGSRKGNDQCETAHMLFVCFHENNIPNLILG

>MmedOBP20

MQMQVNADIKRDCRKQTGVSWASLKKLKAADYNQNDPKLKCYLKCFMQKNGIFGEDDIDIEKALRHLPTGIKGPSKTTLEYCKKIPSVDSCDKAFQLAKCYFKAQPEVLKSVSFV

>TjapOBP1

MQPAPVLSALAALLTFQALIVHAKRPEYITDEIMEMISNDKNRCMAEYGTTEALIDQVNDGHIPNDRAITCYMYCMFESFSLVDEDGEIEIEMLVGFIPEEFQEIAAELIEACATLPGEDVCDKMYKRSSCVQAKRPDLWFMV

>TjapOBP2

MKLKVSGSIIFILSIYLLSVQCAKMNLDELKKMVKPISSSCKKKNNVPEDLLLASYAGVFPREKSLMCYYKCLATMLKLMNKQGQFSLDKMFNQVDLLVVEELAPRVKQIAKDCYDQTPKRDDTCEYTYDLVVCAYNTDSSLSVFSR

>TjapOBP3

MRLSTTAMILSVFFISYIAVESKKMNIEELKKMSKPMMNSCQKKTGVKTEELEAAEKGTFPTGNKPLMCYFRCLAVMFKLTDKDGNISLHHLLHQIDLLVLDEIAAGVNDMLQYCFENTPKLEDSCEYIYELVICMHKRNTEMNFFEGSLLS

>TjapOBP4

MSRFALFLALFAMVVLASGHNIEKMKEAFKSCKTDVGVAEDTPMKDIPSSKMGCFHACVMKKFDTMKDGKIMVENLLERAEKRMNPLPAEMKEKLAKCADDANGKGDECEVAGYMHDCWWDLMKSMGVTPKGSSN

>TjapOBP5

MKLFLEFFILAVTAVCMITAGRPDFVTDEILEMVASDKARCMKEHGTTESMIDAVNEGNMVNDRAITCYMYCLFEAFSLVDEDGTLEVEMLVGFLPENIQASAETVISFCSEQSADDVCDKMYDTAKCIADKRPDLWFMV

>TjapOBP6

MKFVVFACLMVLLVAQHHLPVQCKKMNIEELKGFSKPLTKSCKTKTGISEVILAQVAKREFADDPVLKCYFKCIAQMGKMMDKKGNLILENMLKQVELLIIEELSPRVKKVFTQCFEEMTVKEPCQLAFDFIMCIERTDQELNIIV

>TjapOBP7

MQKIALFLAIFLVAYRVEAANEIPPEIKEMIAGIREKCHRETGVDIEHIDRTVEGYFHPSETLGCYFSCVFNSFDLLDHDGHLDFDKCLKRLEGVESFREHGTEMIEKCRHLSGKNPCDSAFNLVQCFQQANPEKFFVI

>TjapOBP8

MKTALVFLAVCLAVTFASTLKDEQKAKLREFKEGCIKESGVDAAIVDGIVKGGPITRGEKIDCFSACMLKKIGIMTADGAIDVEAARGKVKTTNADPDKANKVIDACKDLTGKDACETGGNVFSCFITKKDFPVLD

>TjapOBP9

MYLLGSLVLASCIFCVHANKVPDEIKNLVGGIREKCHRETGVDIEHVERTVEGYFHESEVLGCYFSCILNSFDLLDHDGHIDFEKMVVRLKGADSFREHGMEMVEACRGTTGKNPCDSAFNVFQCFQKTNPSKYFVI

>RcyaOBP3

RFDHSRLNLVTLKMNKLVIFGILCVCVATALKPRADTKAKCYAQTSLALDDVKAMKTSTLKPERQKLVVEYLACFMQDRAMLTPDGAFNAEACKKEVRPENAAAANPVIDACAGKRGTTAVETTSKLLKCLKEKDAKLLEKLDIF*

>RcyaOBP2

MQIIIILATLLVVSLAAPTDVETVNEKVIAPDSEKLVKIVESVSQSSESPVVEKTDKFEEEKVGDKEEEKSEVLIPGGKAQATVAANTEAEEKLGEEVISDEEKDKNYREYSAVCRASTGATEEQIKASVKDVDDVPKAVKCYVKCMAEEYGVEKDQVLQKDVAKLHKPASLSVEEFEEI

TETCGSLQTDDPCDSAYLRYSCYFRTSGEKIRLA*

>RcyaOBP10

MKFLIVMFALGVAGALGGITDEQKAKLTSYKEACIGETGVDPVLVENAKNGQILEGDEKLNCFAACLLKRVGVLDAEGNVHEEVARAKVPADIPQEKVDEVINRCIGLKGDSVCQTGGQVFGCFIKNKAFRVL*

>RcyaOBP11

MKASVLLLTLAFASYLVDVESRMTMPQITNALKSLGKTCAAKTGVAKELIDATHGGEFSEDRALMCFYQCILNMMKTLKDGKIDQAAADRQADSLLPEEFSERSKAVTVHCLPKLTSEDACELSWQYAKCNWEFDNGAYFFP*

>RcyaOBP8

ANSRTRRYHYYPLQRSSSLIMKILISSVILILAFTIFVNAGPHHPPVPAHIQEMRDTCLKELGISEKSYHEGKKNGEYEVEDCLEACITRQLGIIDTDGNIDKEVAKKNFPHHVSEENATRIVEACAEKTGENDCETAVIYGNCFKEMVPPPPMHQEMKKIHDDCKRELSLSDADVKELQDSMADATEDCFLHCVLTRNGLLNEDGTVNKTGILKGAPPHAEEEARTAANECAREDEGSNRCETALRVFRCFEKNDFRIGHHHGPPPSRPDNE*

>RcyaOBP1

MSALVRFGLIISLLCIGKSLAMSDEMREMTQMLHDTCVEESGVKEELIANANKGDFAEDNTLKCYMKCLLDQVSGITDDGDIDVELIISMLPDELTAVAGPVMRSCGTVKGTDECDSVFQ

TQKCYYNNQPQHYFLL*

>RcyaOBP4

MKIFVLTFLSAILVVEVISSESTKIEEDVEKWSNTCKKKLEISEEKFKEFQHMEEPTFTNQQLNCLVACIFEQAEVMKNGKIDTLSILEFSNILGNEGMGDVREAAEKCHVEANTKTDKC

EVSAAFAQCIVEAINAKS*

>RcyaOBP5

NSRTTHVDTIASASVPFYSLRQLQVHFAITMRSLISTAILLLGLAVIVNAKPHHGPEAKEAWNACLAELNTTAEVHHGQKKNGEFKNEDCLLACLNKRSGLINKDGKIDKETAISSFPPHVPKENATSIVEACFELKGKNDCETAVLYKNCIKKSIPHSPKHQEMAKRYDECKKKLNLTDEDLEKLRNSRNDAKEDCFLHCLASKFGFLNEDGTVNKEVVVKKSPPHKKEKAEAISNECAKEVGENECETALRVYKCFEKNDFKVGHHFGAGPPRPEDE*

>RcyaOBP6

MYSTNLFLVVSIAASWLSLCSAIPTSITDDLEVLRLCNASSTVSLDTVNTVLVHRNMHHPQARTDSFKCFLLCLYVEYEWMDRDGGFKLHTIKSSLVAAQIPENHIRSLLYTCTSTDSTHPCHRASIFTECFWSYKTNNFEEGKTPGGAMK*

>RcyaOBP7

MNLSIAFIFGLVCLTAALAHKGLTPEQIAKMKEMKEKCATETGVDVEVLKNPGGEEAMKDEKLHCFGACILKTLEILDEDGNFNKDVAIEKIPDGLPKDKMTEIINDCAKEKGATPCETAKILFTCFHEHKDHEVMEMLHH*

>RcyaOBP9

MNYLISAYCILVYLVFRVNAETNDEHFEVRQKCFAENNLPADGLSTSGSNSFFNNPKSKCYLACFLQNINVLKEDNTVDKVLAVDLVDEEIRDLARPAILKCITEHDNVDDRCEKSFELI

KCLAEAAPEVFGLLGIIGVPTRS*

>BcucOBP1

MSLTMDEERHRDLLEARQQQLQQEQARPALTAAVLRSCMKETELSMAELHRFRLSLLSRDPEVLNGTNDPTTELPNLSVMEEFSEYSEIDGIVYEPEVEINASHDNALEYEDPFTFKSNENTDESLQCFAYCLYEQLGLISKGVYMEEELFAKLYAIVGRERHLVKECMNLNTNNKCESSYKMHLCYARLKTLEEENRLRKLMEDAYNGERDDEESEEIPQAETTQETYVMNEIGQTEST

FPVEEDAITENVGIKKKLKKLKKKSKRVDADAKFSE

>BcucOBP2

MISNVVYRAYIGFIILDIASILVTDAHGNFFTKVLHFIGSQNRCLNPPRTARRVESFIQECQEDVKNKLISEAYYILKNEVNEDYSALDINEENISGTKSPPTTSSAPSVIHTIEDNSNLESRHDVLYQFEPDKRHVTHLAQHFRRISYDPRSGIYHPTLVPAEEKRLAGCLLHCVYAKNNAIDKFGWPTLDGLVNFYSEGVNEHSFFMATLRSANLCLHAISIKYNINRRKLPKRGESCDLAFDVFDCISDQITGYCLNQYE

>BcucOBP3

MKCFVGLLLLLVLLGVHAYDFDDSAFNEYLFKELQSHYEGEELYTHRTRREATEAKECAKRSWKKDMQCCKNGNVNGDQWELFKSVKKQCIADLKGEPADQAYDPFDCEKMQQVKEQMICITECVAKRFKSLDENGELQRDAILEGLRGQIGTVQWKLDAIEGYVDKCLAEVKEKREQRQKTGQLKEGSCSRLPIAFHSCMWRQFWNGCPADLRVDSPKCNKMRERVADGDTRFFGKHFLNKYYPSPRDDD

>BcucOBP4

MALIYVLTVLSACLLAQSHAAPFNCTEPPNLGHFNIHSCCRMPEMDLGETPAKCVAYIKTLNAQARGMMNGMGGGNNKNNTNNNNNRNAAPAEFPAYAHICYPECIYRETGSLVENEFNIENVKKFLNKSVNKRDKDIVPQIVRSFESCLDNIKGHMAAMGIKTYAELPMGCSPLASMMYSCVNAETFLHCPAKMWKNEEQCNVAKSFAAQCNPLPHVPLPIG

>BcucOBP5

MSQASNMKANFGCFIVIFVCVCYASAEDESVDCTKPPRFIPLHMCCPVPDLSTEELMEQCAEFAKPPPPPPIGRGGPAKFEHSHHHPPHMRGLHPHPCLIECIFNKTEVIGENGEPDVDKFSALLDTTVKDNEEMAAIMEEAFEECTEKASELKAKIAEKISKYPEFAEKMANHRMQAACSPFGAMLMTCVNMETFKNCPASVWNDSTECNTVRDFINECKRV

>BcucOBP6

MDSKLIVFTALVLAAMVELPTFPGVEARSASIKMSFDMSVSEDQHRINPEMVRLCALETDLSMDELRKFNENDFSNATKNTQCFTHCLYEHMGVVRNGVFVERDLISLLGDVTDPKRMLERECLGQYSDNKCERAFLIHQCYRAGQRMMMPSNHQLEPVDQINEEDNAEEESTANLSKSDMAMTPAHRMAPNSERQLMIKKNLTKRLPKKQTINQGLEEE

>BcucOBP7

MKNLFVIIFACGLLLKFGNSLKIDCDNPESIKEDRIHYCCKHPDGYQEFVDSCAKETGFKFIKHDEEAIVDITADHAILGTCFAKCIFNKLQFMKGDDLDMPAVRKHYEGKFKTDPEYAKEMTNAFDHCHSKSIENTAKFLSNPIFHVPGAKYCDPKPSVILACVIREFFHNCPADRWAKTEECNTVLEFSKKCKDALTTI

>BcucOBP8

MANSSSALLIAGFICMMVVQSLDALNADVYKLSGKRKPLVTREDPTALEDYKRTKRQLPQPLQEFQDFITTSKTECAKEMNINPNELQKALLYEDQPTPKEKCMMECILKRMEVMNQDDTLSTSAVGRIADIIGDNNALITSIAMASAENCKKFITAENSCERAYQINKCIANEMKMRKIKLIY

>BcucOBP9

MSNCNAFVALPYMIMLLYCSVRMSMQDRAKNNGDIFVQHKEQRECVAPILVQTNDSISNEGADVLDMCNSSFSIPMDYIVQFNTNGALSETADKTGMCFLRCYFEKMGLIKAWQLNKDLIMQTMRPIKADSIEFCEPTAKQEVNACVRTYGIAKCLMKRGFDDTCNQTVAQNSFRAY

>BcucOBP10

MSELLEMVNYRKVELALSLLLLGVLAGTTADAQSDATDNKLDKQQSMETTTPMAEAANASGFDFQDVVRTCNASFTIPLEYIQRFNETAELPNTTDKTGMCFLKCYMEKTGLLRNWQLNSTLIRQTMWPATGDSIPVCQNEGSRETCPCKRTYAIAKCLMLRALVDARNKPIV

>BcucOBP11

MYQFGAHEKHATTITISSGKGMSLSGLTWSVFLVVFVVLVLPPAAVTLTPTAPSRSFMEACQVKHNVTLEELDEFPTDPNPDEIDMKFKCYADCLLNGMGFMDKNGKLDAEAMHEWGILDDESYDNMLECKAANDLEDDPCEYSFGMMLCARM

>BcucOBP12

MKYSIICCILATVLLSLCVFSADAGLRKPKKLTPELEAKFEVLTAWIAYRLNLKHAKEACVGEYGYSDELATNLVKIKVANPTDQQKCYVNCLYNKLVFYKDDAINKQAMKESLYEIVGEQRLMNIVNGCLNAGGTNACDKVYKFHACASPEFDKVRGDIFLPDE

>BcucOBP13

MKSFITIALLVVYSVVVLCHPNDPEMRKFIEDCNKEHNVSPKDFHDFMEGKLTTVPESLKCSSHCIMVKQGVMDESGNFKADVAKAKITEEKFAAAIDECKDLTGSTPCDTAMKITECMITHK

>BcucOBP14

MPQAMKYTAFIIIILFSTLIALINADHEETTEDDFLSAGQRCFQRERLAASYQRRFDNFEYPDEEPVHRYVHCIWTELKLWNDRTGFNVEHIAALYRDKANTEVLVPILSECNRNTQNEPTLRWCYKAFKCVLNSRVGQWFKEDVGRKLHERRVGNHVG

>BcucOBP15

MASADAKPPHYSALRVVAEAAIADCYEDSAQSVKVQITDEGFDEIVKGSRTNLTHNAKCIRYCIMRKNGLLNNDNSIDKENILQIFQIIHPQIEKDLLLNVLQKCSQEADKQANNCERAFVTSSCILQELSEDGVTDI

>BcucOBP16

MCCPEPDLSTKELMEQCAEYAGQSHPYQCLIECILNKTEVLGGNGEPDVDKFSALLDTTVKDNEEMAAIMEEAFETCTEKLSELKTKIAEKMSQNPEYAEKMANHRMQAGCLPYGAVLMNCVHTETFENCPASVWNDSTECNTVRDFIKECKHE

>BcucOBP17

MKFFIVILAVVALAYAEDDWVPKNAAEIKVIRQECFKDFPLSEEYIQKMKSFEYPDEEPVRKYLLCTAKKLGVFCEHQGYHADRVAKQFKMDLDEAEVLAIAEGCVDKNVEGSSADVWAYRGHKCLMASKIGDRVKAYIKKTVEEAKKQ

>BcucOBP18

MHALNSLLATLLWFGFLSNVIWAQKELRRDETYPPPELLKALQPVHDSCVAKIGVTEEAIKEFSDGDVHEDELLKCYMYCVFEETDVLHEDGEVHLEKILDSLPESMHVIALHMGKKCLYPKGDNKCERAFWLHRCWKEADPKVIYHKI

>BcucOBP19

MKNFIAFCLILAVTSAEYVVKNEENLQQYRRECATKLKVPEDHIQQFRKWQFPNDSVTQCYLKCVFEKFGLFNAETGFNVEYIHQQLQGAQVAPPGDADHDDVVHDKIAACVDSNEQGSNACEWAYRGGVCFIKENLQLVKHSVKQQA

>BcucOBP20

MLKTIIIKWAVVICVLINLCTKTTAIPISEQEEASHRLHKAHGICIQNITSPTSTDDDTSTRQLVGAYVRCIATNVGLWNDATGYNAKQVAKFFIKERNENEVMTLVDYCNQKHKQADLDLWAYEAYRCATAGRMGAWLSAYVRSAKL

>BcucOBP21

MSNKINLFVLVAVFIALVLRSDQVFGGATEEQMIAAGKLMRDVCLPKFNKITPEVADGIKEGKVPDTKDVKCYINCVMEMMQTMKKGKFLYESSLKQVDLLMPDSYKDEYRNGLGKCKDAAVGIKNNCDASYALLICMRDNITKFVFP

>BcucOBP22

MHFCKVFLTTSVLAFLFATPISAGVTEEQMWATAKLMRDVCLPRFPKISIELANQLRDGNIPDDNKDVKCYINCVLEMMQTMKKGKFLYDASLKQVDLVLPDSYKDDYRGGLLKCKDAAVGIKKDNCEAAYTILKCLRGEIKKFIFP

>BcucOBP23

MLVKINAFKYFLTLLACTGVNAITMQQFESSLDMMRNGCAPKFKVATEILDNLRAGEFIENNGELKCYTRCVAQLAGTVTKKGEFSVQKALAQIPIILPPEMQEAAKAALNACKDVQKSYKDSCERVFYTTKCVRDYDPATFKFP

>BcucOBP24

MKYIVAVLLAALVAMAAAEEYKIRNQDDLLKARKECMEAKKVPTEHIEKFKKFEFPDDEVTRCYIECIFNKFQLFSPTEGFKTQNLIAQLGQNKENKDAVKADIEKCADKNEQKSDSCTWAYRGFKCFISKNLPLVQESLKKN

>BcucOBP25

MKYFVVSLVICSLVMSYSEAQELPMRLKKIVEECKARLGAGDDDVAAMFKYEPATNKQVKCLHACTMRLLGILDKNNKPFEAGAMAYIKSVTASNAELEKLLTEVYNECKYFPASKEGCEFSEAFRVCIIERSRAKGIHMLLH

>BcucOBP26

MKYFVVCLAICSLVISHTEAQELLEKIKQIAEECKGQVGASDDDVTRMLKYEPATNDKAKCLQACIMKQFGILDDNNKLVEAGAMAYIKSLAAGDAELEKLSTEVYNECKNTPANSNECEYAEAVRACTIENSKSKGIKILPQ

>BcucOBP27

MAKFILIAALCILSAAVTKAAFNKEEAIKTFMTRAEECRGEVGAADSDIQDLIAKVPAAGKEGKCLRSCLMKKYGAMDGNGKFVKSVADEHAQTYTDGDADKLKIAREIIDACADIAVPADHCEATEVYGKCFMEQAKAHGIEKFEF

>BcucOBP28

MKTQLILLLACVALVAGKFQIRTAQDALAAHEACHDEFRIPEDIYEKYLNYEFPPHKRTNCYVKCFVERMGLFTEEKGFDEKAIIAQFTAKSSKNLAKVSHGLEKCIDHNEHDSDTCTWANRVFSCWISVNRPIVRKTYIEN

>BcucOBP29

MKLLKICLILCVALISNAKCGSEEAKAAAEECKEEVGATDDDVEAMFKFKSAGSMEAKCLHACVMKRFGLINGDGKMDRDKAIEILENIASGDNEQQALGVEIVEACEGIEVDEDHCEAAEEYRSCMHDKGKENGFKMGRV

>BcucOBP30

MKLLKIFLIVCVALISNAKCSFEEVKAAAEECKEEVGATDDDVAAMFNFESAGSMEAKCLHACVMKRFGLMNGDGKMDRDIAIEILENIASGDEAQQALGVEVVEACEGIEVDEDHCEAAEEYRSCMHDKGKENGFKMGRV

>BcucOBP31

MKFFTVAVVLAFVAVAAAQDGGLKLSEEQKQKVHTLGAECLKETGASEEAVRAVGKGDFSQVDGNVKCFAKCLQGKLGYFVDGKVNEAAVQSSLGKLVGEEKIKAIQAKCNGLKGTDDCDTAFQLHKCYATENASILV

>BcucOBP32

MKALFILVILTVFGSITMQQYSRRELINIYELACMADTNVTESEFRKFITNGMKANEATSDIKCMIMCVMEKRGILKKGTFDTERAYKEIMIVGELKGHEDEIKEAVHNCKAEKGCHDCDTAFKITMCLQEFSSRNK

>BcucOBP33

MRTISLCFIAALLVAAQAQMTAKEYVEICNKEHGVTNTELKQFIDSKMDPAKATNPIKCHMKCVIEKLGFYKNNMLDEALAAKFFKEHNKDQQANVETIKQTIQKCNQMKGADPCDTAYQIVTCFVKSELPMFAV

>BcucOBP34

MHTFYILVTMAALVTLAVCQFPADMEKFHKACMDEAKVTEEELKQFFQNGMKADEAKENIKCHTKCLMQKQGIWKDGVFNADAKVKELMQMPKLKDHEAEITQAMNNCKNEKGANECDTAFKITMCLKEFRSKNP

>BcucOBP35

MKSNILLAILIALSAVVAAHKSHKPSQAHQFYEECLKESGASPALLDPLKKGDFNAVGDKAKCFLKCLENKKGILENGAPNEADIRKVRKVGNEEPKNILAKCNGLMGANECDTAFLLYKCYWQEHAALI

>IkuwOBP1

MNFLAVNICSFAVLLLLVNYGESLRCRSGNQQNDDQAHKIMQKCRKKLSGSESKSGNDYTMSNENESSEEDSESVSSVEELFFSNNNKGSRANNTRNGGNYGQTSNDNYGDNRRSDRRKQDSSSSRPNYSYASNYSSMNDRGNSMSNMNENRNNRNGMQSQNRESNNDDRRNQMGCFSQCFFDELNLVDHRGFPERGSVMEMMTRGIQDPSLRDFIEESISECFYYIDMDTNNRDKCAFSSNLMSCFTDKGKERCEDWDDQ

>IkuwOBP2

MNIFLCYLYIYLRFMCSLFVLSDTALKSKRMTVPQLRNALKGMAKTCLSKTGVDPGIAAATRKGEFPPDPKLQCYFLCVFGQMKILKEGKLSLDSINKQIDAVMVTDVIARAKEVSAGCYDSADSTEFCEHSWQFIKCFFETDQSIYFFP

>IkuwOBP3

MFPRYFECFALLICFIVLLDNHADAAMTMEQMENAAKGFRNVCQPKTGADPAILEGMKRGEFPPDPKFQCYTKCVMTMLKSLKNGKPVLETLLKQINIMMPTDMHERTSAVARNCVTLDFNEDPCVAAWQFVKCQYETDPGVFFFP

>IkuwOBP4

MKYSVLAVCLLQASLVYCAKRPSFVTDALIDGAASVVNACQTLTGVATDDIEEVRNGKWPQSDPLKCYMYCLWQQFGLVDDKRELSLNGMLTFFQRIPAYREEVQRAVTKCKAIGKYLANGDNCQYAYTFNRCYAELSPNTYYLF

>IkuwOBP5

MYVSVIFTLCIVALAGAYPAPDVSEDTKTMASQNQACVDQTGITLEQLEKLALNPTPDMPKSAMCYLKCVLEANELEIDNVLQIDAAVPKRPEGISEGDARKVMQECSTLAGNDPCETSYVRYTCIFEKGGRVVWLRAM

>IkuwOBP6

MKYFAIILVACIASSFAATLTDDQRAKLREFKATCIAETGVSPDAIENARKGNIDQGDAKLACFAACLLKKTGSLTNEGTFNEAGFRAQVPADVPKEKVDDIVNKCGSESGANACETGAKLLKCYLENKTFSVLSD

>IkuwOBP7

MKSFAIVLAVCFISAAYALTDAQKAKLKEHRDACITETGVDTAKVSNAKEGNYDDADEKLACFSACLLKKIGIMNADGTFNEEATRAKIPPGIDAAKANEVINKCKTETGATDCETGRKLYKCYLQNKSFSVLD

>IkuwOBP8

MAALTPQDIIQFGAVRRNCENRFTVDPTSIERARAGEVVNDPEFDCMVACVLDGMNLMTPDGRLNANAALSKLPEGYNQGAVANAINSCANERGRNKCETAHRLYVCLNATGISKVLSGR

>IkuwOBP9

MIGWIPSVLLVLVSLHSIRHASAALPEWVTQDIIDMVHDDKERCMQEHGTTQDLIDKVNDGNIVNERTLTCYMNCLFESFGVVSE

>IkuwOBP10

MLIVGVLDEDNVMKPEQLVIEVGRDMHDEAEPTIMECAEEVKDIEDGSEKLVEFCKCFQEKNPATYAKLGIFGKPGPNRQY

>IkuwOBP11

MKCLLTTAQIMDEEGKIDVDLFVSAIPEEYLSIAEPMLRECGNIRGVDNCDTAFLTNKCWYSMQPKFYWLP

Supplementary Data S2. The amino acid sequences of chemosensory proteins (CSPs) from 13 Hymenoptera species.

>BdioCSP1

MSRHGVYLALAIVALFLVGLVAAEDATVEPTEKATNSRVPTLEEVKNDEFYPLAWATIPYKPVVDNDRLFRKYKQCLLVPKPKGCPRDILEVRTLLPEALESLCAKCLPVHV

ERIKEIFEYVCKKRRADYDEVRKARDPDGSLQKKFEDKFGTINC

>BdioCSP2

MSDRRVFLELVVLVALLAVSFAADEDDVPLVKVVKPSELLDKNAMKDHYPIAWTQVDIKPIVENDRLFKKYKECLTTNHPVSCPRMVMEFKKLIPEIIETECAKCLPAHIEKLKEAVEYVCHRRRDDYEQVRAEKDPGAVVQTKFEEKFGKVNC

>BdioCSP3

MSSRNGGGGGIKKINNHNEKQQSQTQLMALQARFQQKQLQEKEQKLLQLYDQQQQRAHQVAQRGSAGSNGSSASNNVGASAAKVKQLLASSDDRRQQNGFKGIDKSYP

LDPLKSKKTSPIAKPTKSNNNNNNN

>BdioCSP4

MKVSIICLVLMAAIVLVAARPDESYTSKFDNINVDEILHSDRLLNNYFKCLMDEGRCTAEGNELKRVLPDALATDCKKCTDKQREVIKKVIKFLVENKPELWDSLANKYDPD

KKYRVKFEEEAKKLGINV

>BdioCSP5

MAKFMYLAILVACLALGTFAEEEEERYSDKYDHIDVDAVLSNDRLRNQYYKCFLGTGPCVTQDAVFFKTRIPEAIVTRCRKCTEKQKDAFNKIAIWFDEHDRESWEAIMRK

AVSDYQKKGSFEESQGS

>BdioCSP6

MKSFLVLCAVVALVIAEEKYTTNNDDFDIEALIVNVPELKNFNTCFVNDTNCNDVSSDFKRNLPEAVREACAKCTDVQKHIFRRYLEGLQEKLPQQFEEFRKKFDPEGIYLEP

LKAALAKA

>BdioCSP7

MKVVLFVLLAIYAVNAQLYSDQYDYVDVDRILTDDILREQYYSCYMGIADCLTPDAQYFKEILPEAALTKCTKCTDKQKQNFEKIANWFTKNQPAKWDAYIKKAVEIYNQS

KAT

>BdioCSP8

MGRTSVQFVSTVVLVTFITGVKSSDNAIDKPTKKPVLRISDLFDQSKMVHHYPVIWTEIDYKPVVDNHRLFKKYKDCFLAENGFGCPRIATEFKSKYDTTFRLKIKHTM

>BdioCSP9

MKYTCIVALTLMFVVVVVRAQDVNMLLQNKNLVNREIGCVLQRNPCDVIGKQIKGLLPEALNNGCRRCTPLQAANGKKLMAFMKKNHPNEWAMIVQMYGRPRAVY

>BdioCSP10

MLHRKICLALTVVLAVLIVRASAEQLSLSDLNADKLFDQSKMKDHYPLAWNEIPFKAAIDNTRLFKKYKECVVSDNVRNCPRIITEIMI

>CvesCSP3

MLNRLTMQMLIIFIVSATIASLSSFVSAEVLNTSSMYSTKYDNIDINMVIKNDRLVNNYVACMLDEKPCTPDGEELKKNIPDALATECASCSPAQKNIAEVMYHHLIDNRPDL

WSKLEVKYDPSGSYRRRYLSLDKDDDDDDDDNNDEEETQSTTMKV

>CvesCSP9

MNDYLINILIVSSIVVPVLLTAKELKKFYQISSKPIAQTVLKRKKI

>CvesCSP6

MKLLVVLFLGLIGLSVVSSGSTNTTYVPSNVEILKAMENSRVRTPIFKCLMGTGTCAGTGGKVKKFMLEAMKNNCNTCSASDKKRAVNLMKEIRRRYPVDWASLVAKYDPQGVYERKLLAQIENQS

>CvesCSP11

MFNCFIDGIKCTADARDLKEFFPEMLETCCKECSENLLRETKKMGDFLFEQKRDYGIRLLDKYDPNREHRNRCDAALKAKGIDLTRF

>CvesCSP10

MKFLIVFVAVAVVVVLGGDVYDSSKFDNVDMDAIMKNDRLLQNHFNCLIDGKGCTPEAEEIRKHIPEIMETCCAKCSDKQKEAGKKVTQFLIDNKPDMVKRM

>CvesCSP1

MNIKFFYLLSTLVGVFALVLNVNAKYEDVPSDIQKKYLPYIDCVLDRKSCDFIGGQVKKLLPDWFKNECADCNPMIKSEAKKRIPDIQKYFPEDWQLIEQKYGGKSNARQT

RPTFSAPSKPTIVIEEEKSRPKFSAPSKPTDRYNQPQKKLTISENSASPEVLFANDRSFGAKAVLCLVMKKNCDWQMKIFKKSMYIFANINTCPGCENPKVHKFFTQAKNLLE

RSFPHILQDIIDNKGE

>CvesCSP5

MKVVLILFAVIAVALSAKTTYTSKFDNIDVDNILNNKRLLEGYVKCLMGTGKCTSEGNELKEKLPEALATECEKCTPAQKEKSEKIIRFLVNNRRELWDQLAVKYDPKDEYR

QKYLDQAKAKGIDV

>CvesCSP4

MKYIAVGVFLAVFGLVVCRPDDGQYTSKYDNVDIDEILKSDRLINSYFKCLMTGDGCTPDGAELRKILPDAIETGCSKCSRKHKDGSKKIINHIIVNKPDLWKQLEAKYDPE

GTYKQKYKAELEKEGFTV

>CvesCSP7

MNMYFKVFILVILCAGIGFAEEKLYSDKYDHINVDAILRNPRQRNGYYNCFAETGPCVTADAKFFRDHFPEAIVTNCKKCTPKQLENFDKLTDWYTTHELEKYNALVELAL

KKFMKKN

>CvesCSP2

MDARAGINAPANHGIGLLVREMHPRLVGLFWCHCAVMHTSVILLLVVCASHCYQPPPAEAYMTRWDKLNLDLVLENKKLLHHYYNCLMNKGPCPPDGRELKRALPEALS

TECAKCSKSQKEGAIKIIKYLREYKPKEFGILANKYDPDGVYRRKYFASEDTNNLT

>CvesCSP8

MKTQIIFLCVLGVIALVSCAPHQSYANQREISSEEIMRVESQLPCVLNQGPCSEIGMKAKMVLPEILKTRKCLTCTSEENEKIGRILYIMHEKFPHHLIALNNIYGNKQQSTNFH

NFH

>SguaCSP1

MKSIIVVFTVFAIVFAQESTPEYYTGKWNDLNTHDIVDNARLFKKYKQCIMAETNTGCPQEVIELKKVLPEALETVCSKCSPVQVEKIRDTLKYVCEKRKTDFDDILKHIDPE

GTHRPKFEEKFGTLGC

>SspCSP1

MAFINFTILTIFSIILIAFAEKIELYSNKYDHIDADTILSNERLRNQYLNCYLGSGSCITPDARFLRDTF PEALVTKCKRCTQKQHILFEKITLYFTEKEPDTWNKILLKAIENSRKRH

>SspCSP2

MNRVSFVALLALATIAFVCGQEEELYSDRYDYIDADDILKNERLRNQYYKCFYGSGPCVTADAKFFKNNF

GEAIVTKCKKCTQKQISNFDKMIVWYNENAPDQWEALVKKLVENAQENAN

>SspCSP3

MKEIIIFIAIIAVALAAEKYPSKYDDVDVDRILQNSRVLTNYIKCMLDEGSCTAEGRELKKTLPDALQSGCSKCNEKQKQTAEKVINHLRTKRPRDWDRLVAKYDPQGEYKK

RYENLTTKKV

>SspCSP4

MVNIISSILLFSFVFLQYSFAEEMYSDKYDNIAIEDILNNDKVREEYYNCFMDTGPCVTEDAAYFKGNFVEAMATQCKKCTQKQQENFEKVIVWYTENQPEKWQTLIQKAL

EDAKKLNIPMEATS

>SspCSP 5

MASTIKVVCVICVFVTLALADGSEERGGKSRVSDDQLNMALSDDRYLRRQLKCALGEAPCDPVGRRLKSLAPLVLRGSCPQCSPEETRQIKKVLSHIQRSFPKEWSKIVQQ

YAGV

>SspCSP6

MKVAIVVLAVISCALAQRYTTKYDNIDLDQILRSERLLNNYVNCLLDAGNCTPDGKELKKSLPDAASGCSKCSEKQKEGSEKVIRFLVNERPQVWDKLAKKYDPTGEYKL

KFQGQAQTHGIQI

>SspCSP7

MKSIIVIFTVFAIVFAQESTPEYYTGKWNDLNTHDIVDNARLFKKYKQCIMAETNTGCPQEVIELKKVLP

EALETVCAKCSPVQVEKIRDTLKYVCEKRKTDFDDILKHIDPEGTHRPKFEEKFGNLGC

>SspCSP8

MQFKSVILIVGLVIISISAEEQYTSRFDTINVDEILKSERLLNNYFKCLMDRGRCTPEASELKKVLPDAL

ETDCMKCTNLHKKMARKVIDYIVKNKNEMWQELVGKYDPKGTYRTKFEKDAVAAGINIQA

>SspCSP9

MAQHLLLVLLVVLAVARCVFTAPEDTTTDNKYTTKYDQVDVDAIVRNERLVNSYVGCLLDRNSCTPDAAELKKNLPDALQTACVSCSEAQKDVADKFSQFLIDHKPDQW

KLLEEKYDPDGEYKKRYLNDA

>SspCSP10

MEFGVILIFIISCGLSFGSDYYSDVYDKIDVDSILASDRLFNQYISCLLDKGPCTADGRSLRRIIPEAIS

TRCEKCNEKQKSTTKKVLVHLKEKKPDVW

>MpulCSP7 MTNHFIIYIHSSCVRIFIINLYDYFICFLLFFILDRFPEAVVTNCRKCTRRQSENFDKLTDWYTKHEPEK

YNAIVGMALKKLMKKS

>MpulCSP8

MYCPILLIILASLVITIHADELYSDKYDGLDIDGILANEELRKQHENCYMDRGPCDDAAEFFKSHFPEVVATACSKCTEWQSQAFDKIADWYNKNDEATWNAFVAKNMELA

KTMNIR

>AmelCSP1

MRHNYIVILILSLLTWTYAEELYSDKYDYVNIDEILANDRLRNQYYDCFIDAGSCLTPDSVFFKSHITEFQTQCKKCTEIQKQNLDKLAEWFTTNEPEKWNHFVEIMIKKKDE

GA

>AmelCSP2

MASAIKALLIVCALFIYTVTAETEEGQSGRSRVSDEQLNMALSDQRYLRRQLKCALGEAPCDPVGRRLKSLAPLVLRGACPQCSPEETRQIKKVLSHIQRTYPKEWSKIVQQ

YAGVS

>AmelCSP3

MKVSIICLVLMAAIVLVAARPDESYTSKFDNINVDEILHSDRLLNNYFKCLMDEGRCTAEGNELKRVLPDALATDCKKCTDKQREVIKKVIKFLVENKPELWDSLANKYDPD

KKYRVKFEEEAKKLGINV

>AmelCSP4

MKTILIALVPVCFLLGEVFSEDKYTTKYDNVDIDVVLNTERLLNAYVNCLLDQGPCTPDAAELKRNLPDALENECSPCSEKQKKIADKVVQFLIDNKPEIWVLLEAKYDPT

GAYKQHYLQNRVKEESY

>AmelCSP5

MKIKILLFFTILALINVKAQDDISKFLKDRPYVQKQLHCILDRGHCDVIGKKIKELLPEVLNNHCNRCTSRQIGIANTLIPFMQQNYPYEWQLILRRYKIMKYY

>AmelCSP6

MKIYILLFVLVTITCVIAEDYTTKYDDMDIDRILQNGRILTNYIKCMLDEGPCTNEGRELKKILPDALSTGCNKCNEKQKHTANKVVNYLKTKRPKDWERLSAKYDSTGEY

KKRYEHGLQFAKNN

>AconCSP1

MDGQLRALVFTMLVVALTPVSHSYQWPKPNTYMTRWDKVNLDEILESKRLLQHYFNCLMNKGPCPPDGQELKRALPEALKTACAKCSNSQREGAIKVIKYLREYEPKKF

GILANKYDPQGVYRHRYLESEYQSNST

>AconCSP2

MFRGTLLVLVVSLMLAAVYADDEKYSDKYDTLDIDAALADDATRNKYFNCFIGNGPCTEDAAYWKNNFPEAVVTKCAKCTDWQKTAFDKIAAWYAENDEQAWTALMEK

SIAEAKARNIPGAK

>AconCSP3 MKVISVLVLLAGLAIAAERPGENLNIDHVNYVLNNQRLLTNYIKCLLDERPCTGEVRELKKLLPELLKNGCNKCDTSKRAIAEKVVRHLQTKRKQEWATLLAKYDPKGEY

QKRYNSAQAPHA

>AconCSP4

MIFQSFILVIVGLSAIVAQELYSDKYDHINVDEILANSRLRESYLQCYLRSGPCVTADAKFFRDTFAEAVLTQCVKCTARQTEIFNKITDWYTKNEPEKYNMVIAKAVKFLAM

NNH

>AconCSP5

MTLIRIFFILGIFFCSALSQQSSSYISSDKLDELLKDERLLNFHLKCTLGTGPCDKVGHSLKPLIPLVLRGTCRRCSPQDVENIKKVIIFLQNKKPKELAKIYDKYGK

>AconCSP6

MGEGNCTPEGKELKKSLPDALATGCKSCSEKQKTGSEKVIRFLVNEVCHHFLLFIRYCHFHYRSGDVSVHYVFKSC

>CcunCSP1

MTPKRSLIVVATALLVLVAGVVRAEDKKYDSKYDNLDVEAILQNDAERNIYYACFMDTGPCPNEAAIFFKGHAPEAVVTSCRYCTQKQLEMFEKIVSWFVDNSPQEWNALI

EKTINDARKQGLSF

>CcunCSP2

MKVILFVFLAFYAVAAEQLYSDQYDYVDVSKILSDDALREEYYNCYMGTSPCLTADAQYFKEILPEAALTKCVKCTDKQKDNFQKIATWFTKNQPEKWDAYTKKAVEIYN

QSQKAPE

>CcunCSP3

MSRPEINLEFVVSITLLALCIARAADEDNVPLKKPIDMAELFDKNAMKDHYPIAWTEVNTKTIIDNDRLFKKYKECLTNEHPVSCPRMVMEFKKLIPEMIDTLCAKCLPIHIE

KFKEAVEYICHRRRAEYDQVRREKDPDGAIQKKFEEQFGKVNC

>CcunCSP6

MDKRMCWLALCWLLGGCLDKPINNEAIVNGYPWPEPGTYMTRWDKIDLNELFKSKRLMRHYFNCLVNKGPCPPDGRELKRALPEALENGCAKCSKSQLESAIKIIRYLRE

FEPVKFEILANKFDPKGIYRKRYLDPTPDE

TNNSITDENSVDENDQKLKRLIKR

>CcunCSP5

MLRRGVYHALAIATMFLAGVVVAQDTSEESTEITTELPFQKNNRTNEFYPISWTKYNYKFIVDNERLFRKYKQCLLVDKTTGCAHDVLQLKKIIPEVLESMCAKCLPVHVE

RFKEIVEYVCKKRRADYDEVRKAKDPAGLLQKKFEDKFGKVNC

>CcunCSP7

MKHTCAVVVLMLLLLLAIVASAQDVNILLQNKNLVSREIGCVLQRNPCDVIGKQIRGLLPEALNNGCGRCTPQQATNAKKLIAYMKKNYPNEWVMIAQMYGRAKAVY

>CcunCSP9

MKQLCTLVFCCVALLLAVNAAEYNSKYDNVDVDRILQNGRVLTNYIKCMLDEGNCTPDGRELKKTLPDALATGCIKCNEKQKATADKIINHLMKRRPADWEKLLRKYDPKGEFKKRYEAQGRKI

>CcunCSP10

MATKLVFVLAICALAAVVCAKELYSDKYDNINIDAILANDSVRNEYYNCMLDFGPCVTPDAAYFKGLLGEIIITNCRKCTDKQRYMFKQVLKHYTLKEPQKWQELVLKVL

KELPKLK

>CcunCSP11

MHSYYSSRSTRRAYTLNGFYERLFLLEMFLRVCNLVYFIAGALPEALENGCAKCSKSQLESAIKIIRYLREFEPVKFEILANKFDPKGIYRKRYLDPTPDETNNSITDENSVDE

NDQKLKRLIKRHRSTIA

>Dallcsp1

MKSSVFFVLAILGAAFIAAEGGNRYADKYDSVNVDQLLGNERIYKQHLNCLLDQGQCSRQAQSLKDVLPEVLSTSCAKCSPVQRQMARKVVGYIQKNKPDDWKLLTTKF

DPQGRYTEEIRRFILSNV

>Dallcsp2

MLRGAVVIALVFLSAVIAEEKYSEKYDYVDVDGILANDKQRESYYKCFAGIGPCKTAAARFFRDTLPEAIVTRCKKCTARQSVNFDKISDWYTTNEPEKYQIIVAKAVRDIM

AKSA

>Dallcsp3

MRRLIFFVLIAVALAEERPMYTTKYDKFDIDSIIKNDRLFKNYIDCLMDEKPCTPEGNEFKRNLPDALETGCASCSKAQKTMAEKFYHHVIDNRIDDWMRLENKYDPRGNY

RKNYLGLDIETTTVAL

>Dallcsp4

MKIAVFVLLSCLVAVISARPDKYTTKWDNIDVDQILNNDRILNNYVNCLLEEGNCTAEGRELKSVLPDALETECEKCSRKQRDGSKKIIKFLVQNKQDLWEKLMDKYDEEK

KYRGKYEDQARAEGIEIQS

>Dallcsp5

MKVAFVLLAVVAVSLAKPQGYTTKYDNVDLDQILRNDRLLNNYVKCLLDEGHCTSDGKELKASLPDALATGCTKCSEKQRAGSEKVIRYLVNERPKVWQKLAAKYDPHD

EYRVKFQGEASARGIQV

>Dallcsp6

MRAVVILCLLIGSVIAQKAGKYDNVDVDAILKNNRVLTQYIKCMLGEGSCTAEGRELKKVLPDALKTNCAKCDEKQKSTAEKVINHLRSNRPNEWNRLVAKYDPQGEYEK

RFEAAASAKN

>Dallcsp7

MFTKVLLISLLMCAAVMGQEAEQRSRVSDEQVNIALNDPRYLKRQIKCALGEAPCDPVGRRLKSLAPLVLRGSCPQCSREETHQIKRVLSHIQRQFPREWSKVIKQYAGV

>Dallcsp8

MEAKPSTQVLVFFLFTVVILTRDIECYTWPRRNTYMTRWDKVNLDEILQNKRLLHHYFRCLMGVGPCPPDGQELKRVLPEALETACAKCSKSQKEGAIYVIKYLREYMPKKLEMLANRYDPDGKYRRRYYHSTSVDNNTT

>Dallcsp9

MKARMALFLVGMLSLVVGIEAQDVEALLKNPEFVNFEINCMLDEGPCDLIGNSIKNVLPEALNNNCRRCTRSQARIIRRLIDFMETAYPEQNQRIRNRYIRSPTSELADELP

>EforCSP1

MKFAVAVVLCALASVTLAAEMPTIPSKYDSINVDMILKNDRIFRNYMKCVLENKSCSPEGRDLRMYLPDA

LRTRCSNCTPKQKATAQKIIKFMMEKKKDDWKKLLEAFDKTGEIEKSFKESGGIL

>EforCSP2

MKLFAVVLLTLASFALAQQEEEKYDDKYDYLDVDGILKNDRLRQQYLDCFLETKPCVTADAIFIKKNFPE

AVVTKCRKCTEAQKMGFEKLINWMTKNDPETWRAILRKSIEDFTKKGNERRAKEKGERLRNSA

>EforCSP3

MTRICLLVAFLVAGILADEEARRGLYSSEFDNLDVEAILNDDAERDKYYACLMDTGPCHSEAAVFFKDLVPEVVVTSCKYCTPRQLEIFGKIVTWYIDNKSKEWKELVVKTI

EDARKRGLLDY

>EforCSP4

MKSYAIVLIMVVMITKTESQNVQMLLQNRQLVEREISCVLNRGPCDIIGNVIKSTLPEALNNNCRNCTPQQAQASQQIIAFMRAYYPRESQEILQLYGRRGK

>EforCSP5

MNAVLMILGLLAGMALGQDQYTTKYDNIDVEAIIKNERLLKNYVGCLLDNNPCTPEGTELKKNLPDALETNCKSCSDIQKRISDRLTHFLIDNRPDDWALLEQKYDPTGSY

KKQYLG

>EforCSP6

MTSYKTQFALLMVVFLATTYVQAQNIDVMLRNRQLVQRQIKCVLKKAPCDAIGKQIVAQLPEALYNDCRRCKPQDAQNSRKLLAFMQKNYPNELQQMYIIYKPQPH

>EforCSP7

MDKRMCWLALCWWLGGCSNLDGGNDKAGLSTAGTADGYLWPKPNTYTTRWDKVNLDEILGSKRLLQHYFNCLVNKGPCPPDGRELKRECWFRVL

>EforCSP8

MKSTIALVLCLVLVVAGEEQQYTSKFDHIDVDRVLKNDRLLRPYLNCLLKDMQCTPEARELKRLLPDALATKCEKCTAKQKEGSEKVIAFLSKNKPEEWEQVLEMYDKDH

IYRTKYAAEAKARGIQV

>EforCSP9

MSHKYLIALCFVVLVQAFAFAEEEEKYSDKYDDIDLDEVLKNDRLREQYFKCFMDEGPCNTGVIKFFKEK

FPEALATQCKKCTEKQKAGFEKLITYYSEKEPENYQKVLEKLLNKKSA

>EforCSP10

MLKILSLAFLTMVFGVFVIDATYSTADPEIDFYIHNPKLIRKYLDCVEKRSTSTCGIIARRISRLIPEAL FNQCRACTPDEAAKAHKIIQFVRTYYPYDFNLIWRMYYPGAPSGQY

>MpulCSP1

MYCPILLIILASLVITIHADELYSDKYDGLDIDGILANEELRKQHENCYMDRGPCDDAAEFFKSHFPEVVATACSKCTEWQSQAFDKIADWYNKNDEATWNAFVANNMELA

KTMNIR

>MpulCSP2

MSERVRRIRNLQTIAIGINVAVAQSRSISFSTSSQYNTRVNMKVAVVFIIAVVAVVMGAKYTTKYDNVDLDQILKSNRLLNNYVDCLLSKRTCTPDGKELKENLPDALKTECA

GCSEKQKAGSEKVIRYIVNQRPDLWEQLAKVYDPNNEYRVKFQDKAEEKGIKI

>MpulCSP3

MTNHFIIYIHSSIVRIFIILLYDYFICFLLFFILDRFPEAVVTNCRKCTRRQSENFDKLTDWYTKHEPEK

YNAIVGMALKKLMKKS

>MpulCSP4

MSRKIVELLCSLIIIHINVISAVDHVHFSPEILLRNERLLARFVDCLVDEGPCLGPIAKFKKEIPKMMET

QCARCQEQIKVLSAKVMQHIREHKPEKWKKIQEIYDPDHKHQEKLDGLLDDYQ

>MpulCSP5

MALLIKIFLLSVIACATHGQESTGRGISQFHISDEQINMALNDRRYLRRQIQCVLGEAPCDPVGRRLKSLAPLVLRGSCPQCSKDESRQIKKVLAHVQRTFPKEEWTKIIKQYA

GVLSKN

>MpulCSP6

MRNQTVIFVALVSILSMIINTSNARDFDDLQRDGTYMIQVIDCVLGTAACDEYGEKVKALIPEALNNNCKRCNPEQKRKFKLMSAFMKMAYPDQWQQIQEKYYSNRYIHA

DY

>MmedCSP1

MKVAIIFLAIIAVALAATTKTYTSKFDDVDVDGILGSDRLLRNYVNCLLDRGPCTKEGVTLKEILPDALATSCESCTEKQKTKSEKVIRHLVNNKKELWDELAVKYDPNNEY

RKKYEDQAKAKGINV

>MmedCSP2

MKMFIVLMLAAVTVASVSSFVSAEAVNNKGMYSTKYDNIDINAIIKNERLLNNYVGCLMDEKPCTPDGAELKKNLPDALASECASCSPAQKNIANVMYHHLIDNRPDLWS

KLETKYDPSGGYRKRYLNQDHDQDQNEGNEEEIKSTTMAI

>MmedCSP3

MKYLGFLVIAVIFSAVSCDELYSDKYDNLNVDEALANAEVRQTYFNCFMDKGPCGEDATYWKGNFPEAIATNCKKCTEWQKEAFDKIADWYTVHEPDNWNSFVDKMVQ

GARNFGDSRK

>TdenCSP1 MKAVCVMLFCCMSVALAANAYTNKYDNVNVDQILNSPRLLQSYMKCMLDEGNCTPDGRELKRTLPDALATGCTKCNEKQKAVAGKVINFLMTKKANDWARLLAKYDP

NGEFERRYRAQGNRIFAN

>TdenCSP2

MSKGPCPPDGRELKRVLPEALATGCAKCTKKQIEAAVKVIKYFREFEPERFELLANVYDPHGIYRRKYFDNSLDNDVITSNSLTGERNRRMAAVAAAAAGLHSDNHPRKRLI

GQ

>TdenCSP3

MANRFVLALVLCTLVAGCLADEEKYSDKYDYIDVDNILGNERIRNQYFNCFLDYAPCLTADAKFFRDHFPEALVTKCKKCTEKQKEAFEKLVLYYTEKEPEKWRAALTKAI

AESGKKRAKN

>TdenCSP4

MAGLRYLIACLAVLSTIATTSALDPNAFLRMDAVLADPALFQTYLSCFVDEGECPPDGQMLKKLLPELIATRCNKCTENERRTACNAIMMLEQPQYAREWQKLQQIYDPRG

VNYAYLNRFKSACASVDYA

>TdenCSP5

MKATLAMVLCMAVVAVVMGADEVKYTTRFDSIDIEQVLHNDRILKSYINCLLKDAACSPDARELKRLLPDALATNCEKCSEKQKAGAEKVISFLAKNKPETWTEILAKYD

KDNVYRTKYAEQAKKLGVPV

>TdenCSP6

MKALLSYVAVFGLLLLLLLTTSGAEESKYTTKYDDLDIDSIIKNERLLNSYVGCLLDRKPCTPDATELKANLPDALANECSRCSERQRQISDKLSHHLIDHRPEDWQQLEAK

YDPTGTYRRVYLSDRQRLKAAVATTDNTDVGPAAASGA

>TdenCSP7

MERKSVLSIILVVFICAVLTRADEDSREWILYPTTHDDFDINALLSSDQDRNSWYDCFMHKSDCPSDTAKFFKERLSEAVMTSCKFCTEKQLQIFQKFVLWYAQNDPTAYGV

LLHQMMAEAEHKGIDTIM

>IkuwCSP1

MILRWCRSGGRVKVCMVEGSGSIKARSRVSFGLLVREMDGRLWGFASLLCCFVALLLTGVPPGSQAYLWPRQDTYTTRWDKVNLDEILESKRLLQHYFKCLMSQGPCPPDGRELKRVLPEALETGCAKCTKSQIEGAVKVIRYLREFESAKFEMLAGRYDSDGTYRRR

>IkuwCSP2

MRKFLAAVFFGALIGVVMCAPQDHMYTTKYDNLDVEAVIKSERLLKGYVGCLLDEKPCTPEGQELKKNLPDALTNGCASCSEAQKHIADKIAHHLIDEEAEEWSHLEAKYDPTGSYKKLYLLENKTEAP

>IkuwCSP3

MKYFVVALAALVVVAVSAKPQYTTKYDNINLDEILKSERLLKNYVNCLMERGTCTADGKELKASLPDALETDCSKCSEKQKEGTDKVIRYLVDNKPETWKELIEKYDPEKKYRSKYEKKAEELGVKV

>IkuwCSP4

MFRSLLFVLLVATIYVLVDAEVELYSDKYDYINADEILNNDRLREQYYECFMDTGPCLTADAKFFKGNFPESIVTKCAKCTEKQKAMFGKTVEWYTTNQEEKWKTLLAKFLEDAKKMKIAADTA

>IkuwCSP5

MKIAIVFLALVAYAYADGYVQKYDNIDIDQILKSDRLLNNYVNCLLEAGNCTPDGKELRKTLPDALATGCSKCNERQKAGSEKVIRYLVNQRPQLWEKLSKKYDPNNEYKIKFQGEAQRYGINV

>IkuwCSP6

MKLCLVLMVLVVGTLAAENYSNKFDDIDVDRILQNNRILTNYIKCMMEEGSCTAEGRELKKTLPDALASGCSKCNKKQKDTAEKVIDHLKANRPQDWNRLIAKYDPQGEYEKRFKATQAKKV

>RcyaCSP1

MALLPSIILVLVSLTLTSSKSTYSDKYDDVDVDLILRTDRLLKRYVACILDEGSCSPDGQ

YLKSILPDALETNCEKCTEKMKTNVRKMSNHLIKNRPDDWAMFVKKYDPERKYRESFTRF

LNE*

>RcyaCSP2

KALAARRSEMSRTFVLLFIVGVALASDDDKYTTKYDNIDVDAVIRSERLTNNYVGCLLAT

KPCTPDAAELKKNLPDALATDCSACSAVQKNAADKLSHHLIDNKPEDWKLLEEKYDSSGT

YRSRYLNEKSENKSKETSE*

>RcyaCSP3

MATRVFALTLVCFLVISTCTQVHGYIWPKKNTYSTRWDKVNIDEILDSKRLLNYYFKCLM

GTGPCPPDGRELKRVLPEALETACAKCTKSQIEGAGKVIRFLREIQPEKWKPLADKYDPD

GKYRRKYFGSESPKSNKA*

>RcyaCSP4

MFRLASVVGLVLAVLAMAAGEELYSDKFDNINPLEVLENEHSRDEYYKCFMDTGPCVTED

EKFFKGIYGEAVVTKCRKCTERQKEILDIVSVWYTKNQPEKWEELTRKMVDVIKKNNN*

>RcyaCSP5

MTVIMKYLFVCCLIICSSMTENTFANQQQARPRVSDDQLEGALSDKRYLMRQLKCALGEA

PCDPVGRRLKSLAPLVLRGACPQCSPEETRQIQKVLSHIQRNFPREWSKVVQQYAGVA*

>RcyaCSP6

MKVAIVVLALVAYVSAASYTTKYDNIDLDQILKSDRLLNNYVNCLLEVGNCTPDGKELRK

SLPDALANNCRSCSDKQQRGSEKVIRFLVNERPQLWAKLAKKYDAAGQYKSKFQNVAHNH

GIKI*

>RcyaCSP7

MVAGINAWTRRVPSISSPFRTHGIGHLRNMKVVIVFMVVVAYVMADRLYTTKYDNINLDQ

ILNNERLLNSYVKCLEGKGNCTPDGKELKEALPDALETDCSRCSEKQKSGSEKVIRNLVN

KHPDIWERLAKQYDPENKYTAKYQEQAKQAGIVL*

>RcyaCSP8

MVRINFATVLGFAVLAMAASEELYSDKYDHIDPQPILENDSLRNEYYKCFMGTGPCVSED

AVFFAGMFTEAVVTKCRKCTEKQKKNFDVIVAWYTDNRPDEWEELMVKTLDEAKKKNLST

*

>RcyaCSP9

CNCNCNYFEAVNFVDSDQENFATMKLALVFVFGCLTLTVSAAPEYTTKYDNIDLDKILTS

DRLLKNYFNCLMDRGNCTADGKTLKDIIPDAITNECGNCNDKQKSGVKKVIRYLRKNKPE

LWTELVDKYDPEGLHRASYPTEENEEAGTVVPAETTP*

>RcyaCSP10

MQCLSVVVLVALVAVASTQEYYTGKWNSVDTHAIVDNNRLFDKYERCILGSTSTGCPQDA

LELKDVLGEALEEVCAKCSPEQEVKIKDTLSYICQKRPESFARILTKIDPEGKYRPKFEA

KYGTISGGC*

Supplementary Data S3. The amino acid sequences of odorant receptors (ORs) from 4 Hymenoptera species.

>BdioOrco

MMKMKQVGLVADLMPNIRITQAVGHWLFNYYSEGMRFPHKIYCMVTLFLMLFQYGTMAINLVKEADDVDQLTANTITVLFFLHPIVKVIYLAARAKIFYKCLGIWN

NPNSHPLFAESNQRYHTLAVTKMRRLLFSVCGAVAFSVICWTGITFMEDPIRTIHDKETNETTIVPIPRLMIRSAYPYNAMSGAAHIFSLIFQFYYLVITMGICNMFDVLF

CSFLLFACEQLQHLKAIMKPLMELSATLDTVVPNSGELFKAGSADHLRESSGIQPSSNGENVLDVDVRGIYSNRQDFTATFRPTAGTTFNGGVGPNGLTKKQEMLVRS

AIKYWVERHKHVVRLVTVVGDAYGVALLLHMLTTTITLTLLAYQATKVNGVNVYAGTTIGYLLYTLGQVFLFCIFGNRLIEESSSVMEAAYSCHWYDGSEEAKTFVQIV

CQQCQKAMSISGAKFFTVSLDLFASVLGAVVTYFMVLVQLK

>BdioOR1

MQIAVISCRSRDVLFLMQIDAILHFSRDDHSRKCQYLARTNREMASTNDNSASQRQIMQTKGCSSDGSNGLNVVGMDFFDSRYFTVNKVLLRLMGLWPYESALKKM

TTRILVTIFAALSVIPQFICLSSSGSNFHKAIQALATLLYFIGLWLKYILYVISESRNKILFRNIAENWKLLETDEERNILLKYSETGRFLSIGYVAYMAAALVLFVTLPAIPPVL

DKYLPLANGSRPKIFLLDGEYFDDKLENYRAIYIFEMISSTLPPFLLVPIDSTYALTVEQCVGLLAVVKLRLKLITKRAKQATSGNYQTKDVAYEKLVKAAELHQKVLHF

AQVVQTSYSTAFLVVMGVNVILLSAGSVVIIMNLDVPIEFFRYTLIYIGLMIHMFYLNWPGQKMIDSSGGIFYDTYNNEWYKCSLKCQKLLKFMMLQSIEPLELTCGGY

YTMNFQNYGSLTKTSLSYITVFASFR

>BdioOR2

MHEHCRSLKRFAVAVVGIPRKKSSQSHILARVETTAMNLAKGFDVEIGLTRRLLRSTGIYPDPNGFQSVASRGYFLIPVIFMLYFCNIPQSVTLKKIWGDVSAVIDLLTTTS

IPFGIAIFKHVGLRYNADVLSQLVLSMSDDWKSSKTKKESEVMWKNAKISRIISITIFSLATGSTITFFLMSLITSHNEIKRQIENNVTNIIRPLYMSGDFFYNVQRSPHFEIT

YVFQIITMLYAGTTFSGIDAFFAVLMLHLCGQLSNLKENLRCLADSNAANGEPSSVILYRLITRHQHLARFAESVEDTFNVMFLPQLLTSSLVLVFQAYQLVTTVTSGDL

QLSELLHRIYFTLCFTFSLFVYCYIAENLRNESMEVGDAVYQCEWHNLSGAEMKAIMMIILRARRAFIITAGKIVEFSLETYCSILKSSAGYVSVLLAMKDRLN

>BdioOR3

MRLPEVIWPSRDILMTFGLWPMHPNATLTRRLFANLRFIVGLSGVISLIVPELMTVAAHWGDIDVLEDYGALALVHILVASKIVYIFLRRRSFRSMYQYLMDFWDISDDP

REREHFERLAKLAKLASIIFTVATVSNMLSFEATPLVNWMRNRREINEGLRNRPLLLELEYPFLKFHTPLKNFFFSLCRYVNLKNYKIFLISFDSYPFDAHRTPNYELVFI

WQSFGGCCAVLSVSGFDCTVMVFIVHVSAQFRLIAARFRAITRKISEQTTVELDHVLRAEIGKCIAQHQHTLRVADDLNSLLSPIMFAQIMTSGMQICLSGYGVIEGDSS

AVRIIKFFVLLTSLLIELIIWCVPAEILIQESGAIADTIYYDVPWFKLTPSLQRDLGFVMLRAQKACEVNALYRVMCICTITEVVNAAYSYMALLSGMST

>BdioOR4

MSAVVAFESFTDVSHDPPKRNDNAHFVPMAIQETYDSIVNWNRVLLAMIGLWPDENGEYNVFSKFRFFAATFLIFYGGTGPQTAELFLFCRDIDSVMENLTNSNFAM

ANSLVKILVWWRCTTDLKPIYNCIRADWQKPKTDMEYKEMLDVARLGRSMTKFLFVMAQGNVAICCTLNIFMHVTGLFPTRFLYFPRSYYPYNTSVTPIYQITWLSQF

VAGFTVATTYIAVDGFLGFLVLHICGQMAILKNELKYLTTPIKREETNALGLIREKLRYVTRRHAHLISLVEIIENDFNVMFLFQVLSLSIQICFQLYQGLKAMASEEGASF

FQVFFMCYFTFCVVLLFYVYCYVDEQLTVQTSGIRIAAYECEWYNLPIDEIKALTFIIFRTEKPPCITAGKFCSFTMVTFGEVMAKNIYLFLLVLRT

>BdioOR5

MTTRVSPKLPQSSSQPYFNSDYIKDTEYVVRVAKTLLTPIGIWPRDGDNTPMSNLVFRIRVDVIFCLMLFLLTPHFVWTWFVADNLRKLMKIIAAQVFSSLAVLKFWTLII

NKKDIRHCLDVMENDYQEVESEDDRQIMIKNAKIGRFFTVAYLGLSYGGALPYHIIMPLLEPRVIRSDNTTMIPLPYPSEYVFFVVEFAPLYPIVFVTQIFISALILSINTGV

YSLIACVVMHSCCLFEVTGNKIDKWLKNRTPIAGQPLDHALTTRLRKIVDFHVQAILYAETMENALTIVMLAEMGGCTLIICLLEYGILLDMEDGDWLGCTTYAMLM

TSIFVNVFILSFVGDKIKEQSELIGFSAYSIDWLELPKEVILKDLKFIMARANQPTRLTAGKLFDLSLQGFCDVAKTSMAYLNFLRTLEIT

>BdioOR6

MSSVQVDRREGDSFFLLSNENLFSLLRQKKKRSADFDWALGLNRLGLDFMGVWPRERQPDTFARMARLPLMVVWIVVSLILPEIYALMQYYRDLQLAADNLWNTLI

ASASVVKLSLLWYRREVLQQAIRVSSIDWLSDKSSRERDLMLRQASRARLFTLAGYATMFGCVFGFLVAPLFGLSIRLVNNITDSPSRHLPQPTYYPYDVTISPYFELTYVT

QLIGTALLGLTLTVPEGCFVALLFHAAAQCEILAERCRGLALPHPRRELRAMVDMHVRLIRFVDAIEMSFNMCVLSTVIALAIITACIAFIILHIIGSEQESLQVIQLIVLISGVSIFMISMFVYCLASEILAENSTKLADAAYYSSCKLVSHASAKDFFIIMMRSQIPLHMSAGKFFYLSLNAYLQFVKTTGAYVSMMLTIAQ

>BdioOR7

MEETSSFYRRVRRVQTRVLRFAGLIPLEGRTHYFLGTIIMSSYVNFAFAAVSSVYIWAFVEDCINKRFNPDITSELFSFVGFHFRFMYIFGRRKKLTRMLGYVDDLWKGVS

SEEKIHVRMFVRKVSRLSCCYSGIILTTITLYVLSSQLPQLTAETTNETIHRVLPYPFYFDVQSTPRYEILLGIQIVCLLTVTQTSVCVDTSIAFLIMIACGHFRLIQVRLNAIA

RDIEDNEEGRRRPMATVKEEIRDNDEKVGNLDFERSDERIRKRVRDCVAYHSEILEFCNDIFKLSSEIFMIELISTTYNLSLIGILLAGNMPLAEKFKFAPVLLILTTQLFVC

QYPPDLLLQESVGVADAAYIIPPFRKDRLRIDRLLLTLLTRSQIPYQLLAGGQIPLSIESFGNMIRGAVSFFTVLRNFN

>BdioOR8

MEQLHFYLFRRKDRVRRIKPNSKIAVSYFQNKRWSLIPLLEELCGFSPYQRKVKQYSLQLFYSLLASTILFAVSNTLTKDVGNKFGMAVECVVFIFIFIAIVVKLVLASIHQ

RSRQMVYKKIAEHYEKMKEPEEAAVLGKSAEDGFKYTLRYMYVVSVVVSIFVSVPVVRSFYDFCFTHNEFKIPIPIPMNYGFDHHKYWYIIALHFITWMFSCLLIQFTY

DLSFILQVRHTAGLFKIVVIRLRRASDLVDENENIKMSDDTADNSYSLISSAIDLHAECFEIVRLIEQSYTTSWFVILLLSTSGMGAGIYLVSTKFYDPIETLRFALVFMTSLL

HFQMVFSQGQIIIDSAESVSDACCACKWYGLPNKSCKLLSMMMLRTSMPCILTGAKLFPLSMESFSKMLKASLSYYTVFKARS

>BdioOR9

MDIFDNSYFRFNKMMLVALGLWPFNTQILQSCLQLFWTLVLVGVAAPIMNAIVVHMPDVDRIMEDTYNLLYAIQLFLKYLSLCYVQKEMKSLYTVIANNWLLIVDEE

EKKILNEYSKRGRYLSVFYTSMLAITWIFNMSIPLVPEILNVVYPLEVPRPHLYLLKSEFSVNKDDHFYAIYFWDCFTIFCVVIIFGGVDSMYMVTVEQGTALYAIITHRLS

KIRDPFIIDLQGEKLNSYDWLIHTIKLHQTVYRLRNLAILTYHFSRTFCYKLQNRCHSHLYSYVTEIRDSYSVTFFCLSLINLVHLPLNCVVLMVYSHDRVLTIRYTFILGC

LLIHIFALFWPGQKLIDHSTRLLHDAYCSDWYEAPKKTKILLQFFMLRCSKPFVMTAGGLMEMNFEVFLKILKTAASYVTVLASYR

>BdioOR10

MAENSCRLEMQSRKRSNPAMDPCVKRIFEGRYFSINRKILMCLGLWPYGIKYKIYIIRIVIISTLMLLSVPHLIDLILQTEDRDRQMMGILAFLTLWLMILKMVGMISAEE

KMREMHRMIASNWQLIEDENERDILHTYAERARTVVIGYSAGLLIASAFACMIPSIPKVLDRIMPLENPRPEIVLIQGEYFIDKKPYFTLFFFFNYFTITCVIIVTIPFETMF

VVSVEHCCSLYAVVRSRLLMMRRITQKNSSATEVDDAYEWLVQAIQLHKRALTFTTLLNDSYSTSFLFHLGISIFVFPLACCAMISQLHNILNCIPYLMYIAAVLIQGYIFF

KPGQRTIDHQDDIYDAAYCNKWYETSLRTKKLLVIFMIRCSKPATITAAGLLEMNFELYLRMLKAVASYSTVAASFR

>BdioOR11

METNELPKEIIFEEYVQINSRMLRCMGLTVNVRGNRRDARTRILESLPTIITNIICIVDAIFQLQWIIDLWSTNKDLVTQITTSGISNIVCICKGLRMAYCRETLQSLFEKLD

LMWTNTRIPNEIREAVLSGAQNTLTFCKWYISMMIGLGICFALPPLVHVCSQYLSRSTANHTHDFSQRVFLVRYPFEVNSLATYLAVLLEEEYILFYSALYWVCCDTLFA

QLTTHTSLLFEVLRYNIETATNNEKDDDRLKKNVIGFIKRHQKLTRICQQIEKIFSPVLFTTMLLTSINICVNLFELRAMIIEGKFDEALLHSFHLGNIFCQLLVYCIFAERL

TQQTVTISNATYNFKWTEKHYSLRVYLQTLIMKSQKPFYCTAYGFFTIGHNRITACFQIVNRALSFYMMLQTTT

>BdioOR12

MSITDNNNLSKNEDIEQFLNMNLKLLSCLGIKIYLNGSQVIEKRKLLDKIPTLITIGFQVYYAITQILLITEAMQNHQYMIATEVGSYLFSNMMISSKGCRLIIAVTEVDSL

LKELASVWRQNVPGHKIQNKILHKADRARFYCKIFIVFTIGGIFIYCLPILIHFVSLYKHRNTANYTRDYKRIFRVKYPFEINSFATYFFVILIEEYVVIGTALFWMCGDTLFAQLTTHASLQFEILRNDIESLMNEQIVDYAFRKRFSILIERHKHLLRICNRIEHIYSFIIFMTMVLSGLNICFNIFDMIELVNDGDYKAAALHSVLAIDTLGGMVFYCVFAE

TLTEQTGAIGDAIYNSNWTDKDYKLSIYFRMLIMKSQNPFYCTAYGYFPIGHTRLTRILNAALSYFMMLRTTA

>BdioOR13

MENSYSTRKYFGVYRYGTSFIGAWPYQSKTSAKIAQILFSIQHISIILPEVIKLFQSTHDLDLIIESVPPIFYNVILATMFGNAIHHKRDTQTILEKIHNDWKSLKDGKERQIL

SNYADVGKLMTWLYVGACYLTVAMFCAFPLSPMVMDYIVPLNQSRPKMPLYRTQFFIDEQKYFYLILLHNYLATYMGIVALVNTDLYIANITQHICGMLAVLRRRIEN

TQRTGIVYKLDDSLFNETVDCLKMHNNILDTLQVMNSTLSNSLGFLLLILVLLMSFTGLVVLLKWGMWTEVCRFGLFTNAELFHIFAYSYHSQRLIDHNGKVYNAIRC

SGWYQSSIRTRGLFNLMLLRCSKPFRMLCINFPLSLENFTLVNYYYFNKVILINKHFFIIFKIIKTSFSYFTVVKSTL

>BdioOR14

MRERGTMSKNKEKEEHAEVHESETAENYEYAVKIMRRLLQSVGIWPFTSATYPRFLRLFLIAAMCFLLTFFMVPIALHTFMIVNDFKTRARIFGPFVFGMINMIKFVTLI

LRENDFRECLDWLSHDWRMTRRRIENDLMLASARTGVTFTTMCASFMWVSGMSYSTLFSFMQQRTVVNNISLKAFAYPGYYVFFDPYDHFYKIYTIQSMCGLAAFTT

TAAVASIAIAFTMHVCGQIAVISHALHSLASGSFDKDTFCYIIEKHLRALRLANKLEDLLNGICLVELMSSCFHICILGYYIVMEFDGHNPGPYTYFMLIVSFTFNIFTFCYI

GEQLSEKCNNIGNMVYHVNWYDLSPNDTRSLIMIILSTHRPVVLTAGKITILCMRSFSNVLKAALSYLNMLRTVTTS

>BdioOR15

MSEQVAKPVWNKDSKFALSFNKFICWPLGVWPLDYNSVFSNFRLVFAFVSQIWFMGVQIAAASLHCGNATDTVDYVMMSVCAFMAMSKIVTFRIHMNKIRTVFLSA

LSDWVLIDDDKDRSIMKSFAKTGRFVFKLQIGFSYVSNTLITIGALPFLMPPMVTNGTLFNISDATETMLIRELPVRSGCMFGHYRDEIYGFLYVFESIMINITAHGNVGC

DVFLFTLLMHLCGQIELIKKDLREIGTIVEGSVESREQIKQFIQKHKLILELAKAIEITSSGMLVIQLFCNAGLNLMLGIRVIMALQNKLIFDAIRPLCGLTVLMLQLYLVSY

ASDRLCSQSESIVDVLYKSKWYELPPKLRKSLCFVAMRANKPVNLIAGQFYTLNIENFKNILKASFSYFSILRVMF

>BdioOR16

MKSKTERSGYEECVGVSRLLLQLIGVWPQSHGKGNFFQRNYVFVTPTVIFFILIVPQARKLMFVWRDLNAVVDILSIGLMIVTICFVKFLRVWHNYADLNILLENIHTD

WQTTPADEQKIMWRNARYSRLVVIVIAISSILDCNLLPLIRILQYYSDLKNAPDNVSIPKPQIMVADYYIDVQYGTMGDVMFAAQYITIMLCCGIYPGYDGMFALTTLH

YSAQLQNLQRRVEDLVDRVRRERCSFIDVVVPIINRHQHIYRCTALVEKNFSSIVLVQILAVSMLLCVQGYQIVDLLSKNNMTDFTQLIFTICYVYNSLFCLFIYCFIAEQL

RVQSENLLISISEIEWHELSPCDSKLLLMMMTRAKNPICLTVGKLSILSLEYYCTVLKSSASYFSVLMAVRDKIV

>BdioOR17

MKPPILSVKADIDEVMWPNRLMLVFIGIWPVPERDGYFARVFARFRLCCIIFTAVSFLTVQSITIYKFWGDIKLIAEISCVMLEIVLMLYKVIYVVIRHDKFKDTYRVISELW

SLAGNQEERNAVAEFPSRSKLITIVFFWSLMADVVAFNGGSVILCIRSHIALNGSQYNRYLPLPLWYGIDIEQSPIFELLLASQTVGLAVLATTGVACDTIIMAIIMQFVGQ

FKLVSLRLKALGRLVDHDISKDKVRRQMGLCIEHHQRVLSTFQSAEKLLNPLTFGQLMLASLEVCMCSFAMIEIESSAAYRLRFIMFLISIFIQLSVFCWPGELIWRESVAI

AEAAFYEVPWLAIPCRKQRDLALMMLRAHRPCQISALGMQIMCLRKLSEIFNSALSFMAVLRSMKEQ

>BdioOR18

MRASIKMAGERSGFDTAFGITRRAMQIHGIWPGFSASKFRMLRYAFFPSAFMILFFINVPQTVMLFRLNGDLSAMLNVLTLANVPIGIALAKLLGASYNQEVLHHLIISISEDWETTKKEHELAVMWEKAKVSRLLSKVSLILGEGTTLAYTVRMFYVLFNSKVPNKPLYMHGSFPYDTQSVPNYQITWILQIIATLMSSGVFSAVDALFISFVLHLCG

QLTNLQVAFSQVGKKGGPTRGPELIKSIEVLVKKHRRINEFADIIEYSFNIMFLCQVFLSTLLLCLQGYLFVITITSGQIVLVEMVFMLYFTVCFTFSIFVYCYVAELLREEVV

KLGTSIFYCKWYNLPAKEARLLVVSLLLVRKPLEITAGKLCVFSLNLFCVILKTAAGYMSMLLAVRDKLA

>BdioOR19

MYSRSLDEMLWPNQLPLQALGLWPTTTVIDRSCTISSFDRFRLGFSLVGLSCLVGPQLYSVKFYWGDVTYLAETGSLVMPFALLLFKLLYMIARRRDFVRIYRWIRRFWR

ISNAPKERAIYESIARIAKTVSIVALVACVADCVVVVGVPLLTELMGQRDCNDKMARQCRRLLPVDVVYGFDYEKTPLFESMFVLQTISVVIATTIATASDASILTAIVHV

VGQFRYINYRLRVIGKKFSAGKVTNVEADIGWLIKHHQIVVSVADSLTDLISPIVLGELLCSGLQICISGYAIIEGNATGLTLVKCIVFFASMMIQLTMWCVPGDFLDAES

GRVATSVCHELPWPQLPTSLQRDLVFVMLRAQRTCKVVAVYQATNVAKLTEVLKAAGSYMALLQNLKQ

>BdioOR20

MMMMHVLEEIKSTNTEYNLLPFQFFLLTFWGIWLPDNLSTKTKKLLQIFFHVVVLLDMIICVEMMIFIEESIKLHSFKLINVFLTSATITGIYKAIITSLNREVIRSFIRRFFD

QEFFKPENSEEASILEANNLQVRKVITSYSASMAGIFAIRAISPMISGDDKSMPVDAWYFYDVQKWYYYWLTYIHQVILGSSLICVHVGIDTLFVGLLLKLSYQIDILKYR

LQKISGMCYSKEKSSKHYKVAEKDIIFECIEQHEAIYKFGKGLNALFQDILLIQVITSIPNLCINIFVLSTDTGDIDIDYISILFNSTSSLIQLFISCWYGNEVILNSLDLKNAIF

NIDWTKLDLSTRKLFIIQMLRSSKPIEFTVGYIIPMNIDSFIKIIKTSYSAFNLLHQT

>BdioOR21

MDILKSTYYIRCNKYLRFFGQWPYQKLTNRVINLTLQILITCTIMLPQCIKLYQVRHDFGMVILALPAMFYHAAYIFKIIFCAIKSSKIRVVLDRVQRDFRVFKGEDIEIIHE

YSARALKINTFYTIYMYAAVAAYSILPLTLHTADTLFPLPFNQTRLQGKPRLLTYFNEKLDNSNFFIICHGMIADMLTIVFIIGFDTLCFALVYHTCALFNIVTYRMRDAIY

NQRKAKKLDTVSKEYNDVVYQNFVETIIMHKYVLESVEIIESAVSALYLLSIGCAMLPLTLTGFQVISNKGAVDQMLRFSLFAFGEIVHLFYYNWPGQKITDHGSIVYES

CYNSEWYGEAVSNKCKMLMKLMILRSQKPCYLTAGKLYILGLENFAAIVKVSMSYFTVLSSVM

>BdioOR22

MHLNEVLWPHKYLLTMFGMWPMHPNAPLARRRFANFRFIVASLIVISLIVPEIMTVVVYWGDIDILRDFGSLTVVNTLATLKLLYYKYRERSLRSVYQHIKNFWNISDD

PQERRHYERPAQVMKVLTIFCWFAGMSDWLSFEAFSLIGIVKSRRAIDESLRQRPLLLDLFYGFDTQRTPNYELIYVWQTIGVFYIVSAIVGCDTTMIVFIVHVSAQFKFI

AARFRAIGREIGEQRMMMKDDDDRKLRAKIGKLIAQHQHTIKVTEELSTLLSPMVFGQIVTSGLVICLGGYAIMEGNSNAAYFVKYIILFSTLLLQLFAWCASAEFLIHE

SISIAEIIYCEVPWFKLKPSLRRDLNLVLLRAQKACYVSALYQVMSLSRITEVFNAAGSYMAMLNSMK

>BdioOR23

MDEYKIFDSPYYNIQNFYWKLLGFWPLDRYKWIKRVIVITIIVSLIIPMAIKWVEELTSDIDIVLEVTGYLIYLSGCLIKYLIFLRSETQMMFLFDKIANDWRIMKYDEEIQK

LKEYGLAGRQLTKTYMGVLNVALVIYIFVPLIPVFLDVIIPLNETLSRSLPYFAEYFVDEQVYYFELTAHAWIAIPLTVQVFCAFDTTYAVCVQHACALFYIVEIRMRRAA

MIATSEKYTDKKKQVEDEYNSIRAAIMLHMEAIQFIDEIEKSYSIIFLMIVTLNSAIIVLAAVVVLMSLEKGNMKQLTRFIANYIAFSAHMLFNMLPSQQVIDHSANIQN

AVYNCNWYNVSPKTSQLLKIVMLRSLRPSSFTGAKLVELNLENFSNVFRKTISYVTVVASMR

>BdioOR24

MMAKMIDDTGIEYKLFYDTFFVMKITGFWRPTTIKQRWLKWLYGLYSIITSINVSLIIIESLAYIAISKDNFLDAFAQNWYLPAIVSHTFYVGLNVKMKRKKILNLLRTNI

MVERWANLRDAVEIKIIKASDKTERNIFRYWMSIVAANGFMNVLNPITSENPDNELIFNTWKPCDTRISSCFWLCWTSQALSYANASITNVSCCCIALNLIERVCSHVR

ILQHRLSLMPHLVSTGVLNTAEKEKVYLVQCIHDHQNIYSTTKDISDLFSRVITLYFVLNLSILCTNIYLLSNQPLFSPKFIAAFLYLCCMLTQALVLCWCGYKITQINDEIS

YGIFSMDWLELRRDTRKTLRFIMLSVSKSIPLFNNFLVELSPEMFLKIIKVSYSAYNLLETMK

>BdioOR25

MDGQEGFDFVFKLCSICLRSIGAWPELYESFVGRALTECHYFANLFILIFFVNFMQTVQLIYFWGDVDVMTNVLSTADLPILNVSCMMIKFWFKRQVLRDLISMVRND

WSRDKSKKELELMTSSATMARTLATICVSLGQGSCLFYLVLHVYLQFTLNLDFRLLYLNAYVPYDSQTSPNYEFTWLFQCLSTFISTAGFIGFESFFVIVVMHVCGQLHC

LRHRLGNLNYGDASVDVRTNIAEIVEQHNHLYSVAYNIEDIFNSVNLVQLMNFTVIFCLLGFRAVIMIKHGDGTLIEAIFVVGFFTYLSSNLFICCYVAEQLRSESLAVEF

AAYDSCWYNMETKDARLLINVLMRSKKPFEITAGKFFIFSLNTFSSLMKTSASYMSVLIAMKNEDDS

>BdioOR26

MDIYDSRYFSINKRLLTVYGLWPYDRPYRKIITMLGLVLLPILNVPHLCGLVIHFDNVEAVFEILCVQVYLVGAWFKLLTIALADKKMKILFDNIVKNCKSINDESERKIL

HHYSEKGRFMTIFYLMVGLLCLVAFSFLPLIPTILDLIHPLKEKRPYIYLYTYAEFFIRNKDPYYWFFYVWDFVTVWMVVSICVAIDTMYSACIKHCLGLFAIVRHRVRAI

GRSVWDGSLKGDANSTYQQMVRVIELHQKVLQFTDIMKDSYNICFLVLILIHLIGLPLCGVVTIIYIHDPINAIRGFLAFLGLAIHQFYLSWPAQELTDYSGDLFVDSYSN

EWYTCAPDTKKLLRFFALRCTKASSLTAGGIMDMNMENFRRIMKTAASYITVFASFRATESN

>BdioOR27

MKYFFSFAEMDIDFARRASIDCPENADEIRERLCLLFENSAFVHRISGLWPKNDQFLGQYRAIKCHAGIISTFFAVLMQLSLITRIDKDHKAQFMMEFGIGLSALVKILVC

IFNRRGIIKLQQATYKVNSQTRESSSEKRIAYWWLGLQKKLVSFTVVSYTCVYFAYLLTPLITGDMFPLLGLVPNVFRELPWIVVVYPIELIVSGLRCVMIMSCDCYFITFA

CQLFSELQLVQRAILDVNRRSIERVIKRHRRVLDYGRMICRNYSIAIVTQHCELSIFACMGALSLPYLKNMALLYNFLGLLIMTATQLLLLCLVGDKIAAESLKISDCIND

VYAEFLDDVTSLKAILTMLTRAQRPLLLQVGEKFIIDLNLYRLTMANISSVFLVLKKFIDE

>BdioOR28

MLHLNRRLLSVVGAWPLEPDASYSTKMFSLLRIIATCVFCTAMMVMQLITLYINWGDINVMTEIGCMLLGFAVSYFTYLYAVHQRSDFCIAYKFICEFWNAAENQEER

NNIVELANHSRICTIVYFYLAYVEVPVMIFGAASVTFFNYVTANGTDYDRQLPIDLYYGIYCQMSPNYEIIFVIQSLALFYGATAAAGVNSTTMSIIMHIAGQFRVVSLRL

KAIGQIVSDGYQFQNKPTNVLARKIKLCIIHHERVLSVFEFVNDLVGPAIFGLFIIAGIEICFTGWAIMKSDSNVANTIKFVILLMIVWLSISLWSWPGEMIIQESSNIGHAA

FQNIPWYILPCSVQRDLGFIVRRAQRQSQLDAMGFEVMHLRKLTEVSNTAASYMALLRSIKE

>BdioOR29

MKKMMCYRSVMSPSIEVGLRLIGLFPGATQIKGFFIILLIAAINIPFQVWNAIEAYGDVDRFMNNFGPTLVMINFAIKLVAFRLSHRAVKYLVNEVIKDFVNFAKSSNHK

FMAKNLKTSNSIYKLIAISYNALISWCIIVSVGSYYKTKSVEKTEYFIPVTYPYITKNWKNYSLANVFLLFQMIVAANGHAIIEGLLALVVLHAATQVHNIRLAVKCYSEV

CCSSNDKARINIALRSLLLAHQKYLKFAVNVEKAFTCISLSQLTIVTLQMCAVEYAILTLIENNAMTAEGYMYLNLLIADLWGAATYCAAGEYFIIQSDYIYRELCQCPW

YKFRLGDMKTMLMLFPKMQKPPVITYGKLGSLSLFCFTSILRASFSYLSVFRAIKTRQHRGTN

>BdioOR30

MKSQSAVNLNYFQHRAWQLLALNEKINGIWPYQNKFVQYPLQIFHFFGLSSMLFALLNGLRTVAAGDIEIILENAFWIMFTSTLSCIQLLNLTGQRRRRKFYEKVVKQ

YCAMRIIPEEAALLSESADQSLKFVLVYLSALLSCVVVFYSVPMIRALYEYTIGHEHELKITLGAGLDYGVDQGKYWFLLVPIYLNFFFSGFVVGAGFEFSFILQVRHVRT

LFEIVRMRFDRAMEFVDKDDQSFSTIVSAIKLHVECLKMVNMIEDNYSTFFFLLLVMNSAFSALSLHMVTHNMQDPIEAVRFGCLFALIALHFYVIYNHGQMIIDASL

AIHDARYLCEWLDLPKKSRELFAIAMMMQSTEACQLTGGKLFPLSMEMFGKMFKAGLSYYTVFEQ

>BdioOR31

MAAKTIGKKDDKSPLTFDQMCKLYISFFKLISVLPFDGRPLSFVGTQLLLYFRLFFVVILNSASMFYCFNTSSLEIEIISLTMLNFGIGFRYVLVLYKRKAFASLLNECRDLW

RFCNEDGQQTVLYYERKFRHVFVIFYIFGILVNISYPLDALNTRLPPLEPNGTGYHPFPFRWFADNTEGNWPGYWTVFVMQIISVQNAVDYAVPCDSSMALFSMISTGY

FKHLQDRLLFCHKNPTEAKRDVIRCIIFHQRLFKFCSRVNDFYKIISLSQILNAGYSISIVLIKLVSSDSDKYKYLMILGVFICQLYLVHFAPDYLQDESEEVAIAAYFAYGNS

LECSGVGKYLLIMITAAQQPVKILAGGIFVLSLENFGNMLKSAFSFFTVLRNMNF

>BdioOR32

MDILPLNFRTLSYCGIWLEDAESFIFLKKFWGYLLRTIIFYFTVTEVIELYMLKDDVQEVIDVMFLTVTYICLCLKILNFSIQKHNLKKLIQYFHEDSYKITSAEENDLLQKY

VIQHTQIFKNILLLSQTTGIFFCLIPFVTLKPADYIAPFKTYQFYDDSTTVGFSITCIIHFSAIIFGIFVNVSTDTMIYGFIILATGQFDIVSYRIIKAIEDKDIDLFRKSIIHHIHIN

KTVRKMQQVFISVIIPLFILSLLTLCASIFQMAQNDIVSVAFLGFTMYLSCMLAQVFLYCWYGNELKLKSQVIVSNVGGCNWIAMDHRERKNLYFLLMFANKGYQISW

KGQCSLSLDTFVWVTINIFYAHRIAQFEFNTLFFTLLHVFLDYKNVIFCV

>BdioOR33

MDLDVGTVEKVFGNEYLHLNKKMLILSGLWPYSSKLENLIKRILIAIVLAVSAFPHTNAIRLWCSKDLGMCAENIAGWVYTTGVLIKYSVTIFKEKKISRVYELLAKTW

TSIEDPDEKKIIFENAKIGKIKTIGYAGYLALASFVFTQTGMIPVIVDFIVPLNESRPKIEMVHTEYGVDQDKYFYEIYYFYCVLGPVSAGVLMSIDTMYTAFVHQNLAIFN

IVKHRLHLATKNPSKGYEKKEDDFAYNMIISAIRLHQKAIEFNDLMENTFDILFLWLVIICVLFLSFGAIAIMENATNVIDLIRMSMLEFGVFIHLLYMSWPGQLIITESSD

LFVQVYTNNWYHISPRSKVLIQIMMLRCMKPSCLTAAGLYVMNFENYAAVIRMMIHT

>BdioOR34

MDIYDSRYFLVNKKLLISFGLWPYQSFIRKLTIRFLLTIAMCMMLVPQIFQVYFSIGNIDKLIEHVSVVVYVLISFTKLYTAIFHEKKLDILYSNISRNWGIIQDAKERQILMD

YSERGRLLTLGYMAYMVAGCIAFDSLPLLPKVLNILRPMNISRPPTYILDGELFLDRNKYYLVQYTIEVMTTAISAGLMTAFDSMYAASVEHCLGLFAIIKFRLQNSTKSI

CTDNDVLRKNNVLRQLIQTIRLHSKILIFTDVLAATYESSFLLFVGATMILLSLECVLMLIKSDQFMQLIRYGIVLIGAIGHLFFLSWPGQKLIDHSASLFEDGYNNEWYE

TSIQSQKLLAFVTLRSMKPCCLTAGGIYVMNFANFAMTVKTSLSYMTVFSSLR

>BdioOR35

MGIFEGRYFHLNRKLFILIGLWPYEIKTKNIVRTLFIILSIEQSLPHLISAIMHHDNMDRLMLNIFSFVSIIAMGTKVLGLSLNENHLKELFESMERIWHEIRDENERKILLK

YAERGRLLTISYCVFMSVAGSMVATQQLIPKLLDRIFPLDEPRNVMAFVDGEFFVDREEYFMTLFFVDLISCLVVCMVTASSDAMYMVCCHYCCAIYAIVRYRLSKLRR

MVLEDASPIEESNSYDWLVHTIKLHQQTLKFTYDLDDGYSLSFLFYVPCYLITIPLSACGILANLEKPLNLISYAGYFSALSMTVIIMCWPGQLVLDQGNMLRDEALYDNEWYATPQRTKKCLLIFMTRCAKPEALTAGGLVFVCLETYSAIMRTAISYITVAASFR

>BdioOR36

MHEAVRAYYDNYKNGIASMLMVVGLWRGDARQSRILQNILTTFAITELTILILLVLNFTVHSSRNILGLVAGISSIMSFSTVYIKGTVVLVLWRDMKDLKRDLSTLFEEDL

KVASNREHLLAYYPAFYRFFKVHSYIGTGFVVFSNCATLWAALHGKYVRTFPIKVPFDYVPGDSLHWIIFAFEVTSSAVIAIITVGMDMMFGLFAFHMAGQLRLLSHRF

RSLKSGENYKRELKECIDRHCMLIDQKYTMERVFGLTSLLLAFSCASIICSLIYQLTQSKSVTLFQAIFAIDYIGVKLTQAYTYAWFGETITVESERCVESIYYSAWAESGDV

QAMKDVIIIRAQSPMHITALEFMILRLDMFVKIAHASISYFFLLKTIEAKVTWAE

>BdioOR37

MDIFDGEYFATSKKLAIFVGLWPYDTRKKYFVGIFWLTMGIFTAIPQVLGAKVHHSDVDKLIEHVLMIIFITGCFFKLFTLFISQKELKTMYRGIVENYRIIADAKEKAIVS

ECTARGMEIANAYCVFLVSEVSAVIFPPLIAVLLKQFIPSMEKLPYIYIFNGEFLVDDRDAHYWKIYFCDVALMLFILMIVMGVDSMYIVCIEHCIGIFSVIKYRLQLPDKLI

DNGRMIERNDAYGFVVEIIELHKRILKFTETLEASYSMCFLIILLLEIGALPTACYLIISNLKNPISCLRFTIAFNCLMVHYFALCVPAQRLMDTSNNIFSDAYYSEWYESSP

RTKKLLWFFMLRCKKPCALTAGGLVTMGLENYMRVQKTALSYVTFLCSLR

>BdioOR38

MDGVKGFEHAFGMCRTNLGVVGLWPSSNTTKSKGLAKTVLFAVSFVIVATFINIAQTTKLIMIWGDLTNMIDNISTANLPIWVVLMKMVIFRTHKKALGSLLTDVIND

WNAPKTKLQMKNMCENASIAHKISFLCVILGFGSVNGQMAIRISQEFNILPGPPEKRLPMVSSYFPYNYTISPVFELTWLMQYAGAGLATLVYSGVYCLFVGLVLHLR

GQVANLRVQLEGSDEDDIVIPRMQFRKRIGLVVHRHQSLNRFAKKIEKIFSMMFLAEILSCTVQICLQCFMLVTLLSENTGGISFLQILFMMIYVMHVVTHVFICCYVAD

KLRDESLSICDSAYNVPWYNLSARDAKLLIMIMHRAEKPLEVTAGKFVAFSLRLYAQVSLD

>BdioOR39

MEIFDGRYYESCKRFMSICGLWPYQNDKRRYLTSVGFYLLNATLAVPQLILLAQKFGKDIIITVENCVSVMFSIGVVAKYTVTFISKKRLGLLLTQISKDWQRLTDVKERE

ILTKNTEQGRFLLIIYTYYVFAAWILYTLLPFLPVALDLILPLNQSRPVLMPFYANYVFIDQSDYHYTSCCHIAVVYLTCFFLFSGTDTTYVITVKHTRGLFEIVCHRLENLL

DIEKGNEPSELVDDEKIITKIKKAIQLHNETIRCCDLLENSFNLCFLMVNCMSVVGLALCVVYLLIIFEDIFKAIRVIAFIIGLIMHLLYLNWVGQQIIDSSEQVFLSAYSSN

WYFMSNRARKMIDIILVRSLTPCALTAGKLSTLCMESFGIVIIICAIIIT

>BdioOR40

MRVATILPFHFFMLTIFGVWCPVNWSPLLKRLRKLYLLLVILATHILVILQLARLIFVRMSFDEFNDTFYVVIATFAACFKINCNLFHYDELLRLVDMFQQASCLARDDFE

RNVKRKYDDTCGYVGKALLLFVELTVFLFLIVPLNGGIESRQLPYEMYHVYSLASPLVYWLSYAHHVFAGLLYGGLNIISDTLISGFLVQLCGQIDFVAYRMSNLPMEA

RRICCDRDEAMKTIVETTLLKENIRHHVHILNIAETIVKAFNSIIVLQFYLSTLQICMSVYQLTTRVTNVVELFSMGFFLMCMFVTLGVYCYFGNELSLKSVNLSDAIFNI

DWTSLSVSTKRNLVFMILRSSKPIEISDGAFVRLTMQTFASIVKTSYTAFNVLKSS

>BdioOR41

MDVFEGRYFNVNQRLHVILGLWPYLPETKKKIIRYVYLAFMKALSMPHLLSMIVNLEDIDRVMLNFISYFTVIIGMFKMAGLIAEEDRMKKLYESIASNWLTIQGDKER

EILHKYSARGRLLSILHLVFASLTLVVLLLPMVPKILDKLDPLSEPRPDMYVLEGEFFVDRKTHFAEIFFVDWITIAATFAPAIAADSMYVTCSQHSCALYAIVSYRLQQLRRMALDDGPSTTGNCYDWLVETIRLHQTALTFTTTLNDAYSTAFLLMMPFCLFLVPFDSCAILANLDRPLYLIPYVAYFVSTAVHMFILCWPGQTILDHQIILSDDACCNE

WYTTPFHTKKLLLIFMTRCTQPATISGGGLFLLSYETFSTVFRTAVSYITVAASFR

>BdioOR42

MDIFDSPYFRVNKKFLRVLGLWPYDFQRKMVQIFWIIVVLLIAVPHVTAVIVNASNMDKVMEHLLNLLIATQVLLKYVTLATAENKMRYVYNNIANNWLTIVDREEK

RILVEYSKRGRTLTMIYICLLTSTAAAFFVMPLVPEILNVIDPLPVPRSHIYILDGEFLLENRDDHFYKIYMWDTASVLCVITIYIGIDSMYTVTVEQGTALYAIITYRLSELR

GRFLNDLQDETVSSYKWLVHTVQLHDTVLSFTNNISDSYSTCFFCLSIMNIVLLPLSCVVAIVHWHNLVLLTRYLLAIASLLIHVFVLFWPGQKLIDHSTRLLDDAYCNE

WYETPEKTKKLLRILMLRCSEPCTITAGGLLEMNFEVYLKIVKTAASYITVLASFR

>BdioOR43

MQSELKEYEKYTGNVKAMLRYCGLWPAVGNQLVSYTLAFAAFFTTFSTMLAVLNFCLHHASNIIVLTKGAGLAISLCTASLKVCIFFYHRRDLRYLHDNLTGWYLED

MKDTDRRSQLLTRVSLYSRFFWVGTVAAFATIALYASISIIAWAKYGKYLRVFPVIYPLVGKPKGLLHWIFYAYEVTTGMFLSFVTAGVDCSFGMYSLQMCGQLRVLADK

FRNLKADGDYKMKIRDCIQRHHMLYASKKKLENLFGILTIWFAITAAIVLCTLIFQFSQAVKAKSTSLQLGLLTLYFLLKSLQAFSFSVYGNAITVESKSCLDAIYNSCWP

DVYNVSLKNDILIVLAQKPITLVAKGCMLIQLEMFAKIINTSVSYFFLLQTLEEGSR

>BdioOR44

MRIHGIWPGYCCSDSKFMRYVHLIPSCMIFFFINVPQTVQMFHVNGDFNEILNLLTMTDVPIAIAFVKVMCVSLNNKVLNKLIVSIAEDWTSTTKSSDLTTMWFIAKIS

RLVSVVSVCLGECTAVAFTAFMFYLMYTAFANHSENEDFFKPLYMHGWFPYDTQISPNYEITWVLQIIASFLSAGTFSSVDALFITLVLHLCGQLKNLQMAFRELGEME

DIETKTFVRTLAVLTERHQRINHFAGTIEYSFNKMFLFQVCASTILLCLQGYSFVIILTEGNIVLMEVIFMLYYTVWFIFSIFVYCFVAEILQDEVDKLGQAIFYCNWYNWP

AKEARLLIIPLVRINKPLQITAGKFVVFSLNLFNSILKSAAGYMSMLLAVRENLK

>BdioOR45

MKLHDWESVSRSHLQFMRFFGLIPLDGKTLDYLVTKLLMVYAILINVFYNSPYTYYAIDKFSKKIFEAEYICEAVVVQRVFFCFFTLRANRGELTRLVENCRELWGHLTD

DETETVEGFERKARQFRNFLIGNGIAICTAFYGTFFMLTASIPKDQKPLVFKFFVEVHTEPWYTIVMIMQFVVNYTIAVQMGVVEGIGLYLIMMACGYLRVIRNRLLVISE

KNQPEDDDEMVNEEIINCVKFHQNIMLYCREIEKLMSKVYAITVITTVYNISIIGIKLLENGDDKFIYITILTNNVFVFFTVQWAPEHLLSESEAISQAAYFASQRYEPQLK

MKMRRTLLLMTLRSQRPMQLTAGGIISLSIETFGAMIKNAFSFFAVLRSFAE

>BdioOR46

MKAAKILPFHFLMMTLFGIWCPAHWSTFQKYLRNLYMLLVMVVMFSLISLQLARLAFVELSLDEFNDTLYLAIATCGACFKFSYYLAHRDEVSRLIDMFQVSRCLARD

DFERGIKRRYDADCTLVAKWLVTMVWTCVAAMIATPLSAGPAARQLPHEVMHVYSMSSPVAYWLSFAHHSCAAVLIAGTSIISDAIVAGFMSQLCAQFDFMAHRLQ

LLPRQARAFGSVHVKTSLLRESIQHHVYCYEIAESIIRTFKGLIVAQFYASAMQICLSVYQLAFRATNIVEFLNYFSFFVCMLFTLAIYCYYGNELTHKSKQFCDAIFETD

WMSLTVRSRRTLAFMILRASKPIEIADGAFVRLNMQTFGSVVKVSYSAFNVMRQSK

>BdioOR47

MDFYDSRYFCIPKILQISVGLWPYHPSKKLLRTLWLSLSLLVPIPQLIGVKVNFNDAGKLMDHICMVLVPLSIFMKMFTLVLAEEKCKIVYTGIVDNWAAIADVEERKILKRYSERGRTINIVYLGFQSLVYVAFLFLPLIPVFLNAINPLDEPRPYIYVLHGEFLVENQDNYYPWIYLWDGAATTLVLAVAAPIDATYVCTVEHLLGLFAIVEHRLLDLK

SHNASQGHVVDILKLHHRALEFVDIIEEQYSLCFLFLIITQLIMFPLICNLMLMSLGRPLDMFRYAMFAGCLVVHLFNMMWPGQKLIDHNDRIFQAAYQNEWYTCSL

KTKKILRLFMLRNLRPCVITGGGLTVMNFENYFAILKTAASYVTVFASFR

>BdioOR48

MLSFHFNVLTIMGVWCPVDWSVGWQFAYKIYSVVVIFLMYSLGLSQLAQAIFVKQTFDEFNDAFFILLSTNFACFKAACDLLNQRQIVELLRMFGKECCVPRDDFELK

LQKRYDGTCRRIAVNLLAMVELTALFVLVAPLASNGIKTRELPYKVLLPYSLSNPLVYWLTFAHHAFGAVSFTAISITNDAIITGFMLQLTGQLEILQHRFEELPSNVAKS

NTKDYERRLLRECVQYHTHIFKTAKLITRTFSDIIICQFCISALEICVSVYQLSTRADNSVELLTYAMYLVCMLGQFFVYCYFGNELTLQSKRLSNAIFNINWTPLSVEFKK

HLAFVIQRSSKPIEISCGAFVRLTLESFVNIVKMSYSVFSVLKSSA

>BdioOR49

MCKYISSHLTAKNGLKFLNFVMICHGTYPLPNIQSKFIKAMYGLLWWFWMINNAALMALFFYVVFTMNNTIDSASYSLIEVSTIFERAFILILFRFQQYRIMVLMEMME

KQLLVKTEKKSLSISNLYLTLITLMFTCYFSVLYYYLKLDIQSYSFFTKFAISFPKVVADRLFKLNIFNKMVAGFHALVLLIADGMMVLFIHANTMRLKYLDLSLKAAASC

DRLKKCIKEHQDIYFMINETNFIARLVIVKTVVFFIAYCFCSGIQIFNQKVQSSELSLHCLIVAAVFLRVYVCAESAQNMISAAEDMNTTINVSIWYSHKLDFVKSMIFML

LRNQKLPKIHLTVLMPNLNRRYLGMILRITYTYFMTILTLLRKRTS

>BdioOR50

MPSSLQLRLCHYYFYALVAVDGFEWAFGLNRLGLDFFGVWPSKNNSHRWRNAITIPTFILVLFSGMFLPQAQALVEVHRQLPLVADNVVTFNVCVVGMAKISVLWM

GRKEIAELVRQVYDDWLTDKSTSELHSMRRHAQRARLLTILSTSIALASIVGFLFSPFVNISIRQINNITDLHPTRVLPLQTYYPYYDVYRSPVYEFTYLHQIICGYVAATSH

VAPENFFGALVMHACGQCEILEAMFERLAASASTQDSTTFVEQLRRVVTRHVRIIRFVDDVESLFNIMILGHVLFVVVNVGFLGFSCVEAFGENAESLPLMQVVTLTG

TSVTLLSLSFIICSTVEMLTTRVSFSLKKNSIFLPTVEFFIRKCILQS

>BdioOR51

MKFNSKLKAALFFTKYSVILLRCWPPRNPSKIQYIIFELSWWLMFASSLCLLFPLVAAVYIYRGDSEIMTKCICLSCAVSQCTVKTLFCRIRRSKLQKLLEEMEDFVENPSE

LDRKILEKYISQCTILHVSVVIWVYLTSVSFIIGPFLIPQPFPTDAVYPFSVNNTFIKIIIYCHQSLVGLQTSAAVLLDCLVAVLLWFVCARFEALAISINTYNSFDDLKIHIKQ

HQSLLRYTNDVKETIDLFVFATILTSVGGVLFSAIQFIVDQPLAIKGQYAVVAVTASVGLFICSWAADTLLQLGHLIGINVFQSKWYSMDKKTQTSIMYLITQSQHPVTM

KANRILPALSLQFFSQFLVISLKFFASMRMMVGIQ

>BdioOR52

MDILPVPFRAMRILGLWYENPKPHCLVKYIWRPLNVFFLVTVTISLFSSFLAYINDVKDFTECLFITLSYLGSTLKLANFLARHSSIVKLLAKFRARMCQPQNDREICIIES

YERIIAYGCNGHLSIALLCGFTFAMMPVLAILAGSHEYFMPYNSLGFIDITNRLHFWLIYAHQVAGDTVGIIVDVALNFIFVGLLMMACAQIDLCCRRLVNSCNDVDIR

RAVEECVKHQLLIWRIVREVEALFMMIVVMQIFLSLITICTSVYNMSQVSLAESVPMFIFFECMLCELFCHCWFGNELKLKSTAIRDAIYNSEWTTLKPSNRKSLHIIMM

SCHREMNISFHGLCTLNIEIFVWVLKMAYSAYNLLKTVDK

>BdioOR53

MASSFEEMTLLYSRFLRFISILPLDERGFASLTSRTLFTYYFVSSIIHWSMFVQHIINKAAVPTVDMICETVMVLGMNARYYLLLPRRIEFAALLEESRSIWYAIDEEDRRAV

QHFERKMRRLFLAFLGSCIVTDVAYFASAVILNLEAVKKANDTHGPQRILPYKWYMEGGEDMWLGFKFNFALQVIVVANAGVMTTTVDSAAPLLIMLGAGYCRAL

QQRLYRVYDRAMKSNDDYSRADLELLTCCRLHSRVLCYCMKINRMAQTLFFVQLACTGYNTSLIAIKLAGVSATTYVANNLRKKKLFSNHRRRIRTDTSTCHLDYSM

SANCSSASGRRITFSTRARQFRRLRTASPIHGSIVELANCWY

>BdioOR54

MNPLNFKNVRFIAIFIYTCVHFTMNIANLPDSMHSISHLLDTFCEVMSCCTMLIKFVSYKVQRQKFAELLCDLSLDYQLNAYKNEQEIDEFIAYMDMAKSFLKATWVF

SLAGAGAYFSKNWFFEGLGIPTYTDLANVTVMRLPYSVKFFYPVTNMKVYALAVMYQLPMIAIAPFGVIANGSLLVAMVAHVCGQLSVLARHRFPRFGHNTNEFQQ

LVADAVRLHYRIMSLAKTINSAFSFIIFEERMSASIVICFLGYASIMTWNQQDISQLLFVISDMLAQLLIIFEYSYIGQCLINESLYLNDALCDTPWYTLDAANMKYYIILLA

RTQQPLTLNAGKFYVYSLESFVTILKSAMAYLSVLKAVI

>BdioOR55

MNNYFRNRFHKLYFFILFFLIHKRKKIDLLLKSFFLRNRQSHSLVQGAQTGSKSFATPKMDRDYTKYLSYHKLIDTLIFRSGLWHHFEDKISPYRLIIIYGLVISNIIGLKVFS

AVISSYGDVSACLHAVQNTVAIYAPMSRMISYLWYRQEFVFLDKELGAKFKEELEKEENRPTLLKNISLYNKFLYFFIASVGIAIFLYWAPFAVLNFKYKKSVHIMPGSYP

FPVEPRSSFYWAIFTYETTMLWFTFHSLVGVDSAFGMHCFRISGLIRLTAERFRDLDPNDPKSKDRLQQCVATHQLIIRAKLALEKAYGVLIIFTYLISAVVICIVLWEINQ

VCVYIYRTYVRVWIRHSSC

>BdioOR56

MELFKYRPWKILAKCEKYTGYWPYKQTCSLCTLYFVILVTRILPQIIHLVKILHVNFVDVLECIIGVPILTVMIEKLVVPWMKHNCKLQIYEKIREHFRATSDVEEATILRD

FYDRGWQFSVNYMVMSFSFTGLYQLTPVAKKPFNHYFRNVTLEKQLPVPVDYLVDHDKFFYPVLLHIYVGALTAVLMEITFNLSFILIIHHICGLFKIISIRVHKVLDLAN

RAKVTAKVAIKIENSMKSTIILHNEALELVTLLEESVSVPCFVILILNSAIFGANYFIITMHLHDEFHLFRYCILFTIIFSHFYLIFSQGQKIIDSSSSVFDACWDCQWYTTSKK

STLLAVYNKTAKQQAE

>BdioOR57

MTSMSSASGFDVEIGPSRVILRFLGIYPDPKRKLSWISRSYFLIPALTMFYFCNIPQSVTVTRVWVDLNAVLEVLTTSDIPIGIALFKLLGLRYNADVLSRLVSSMSDDWKSP

KTKEELQIMWANAKLGRLMSIIVISLAEGTIVAQFAMVVFFSYSEYKRQVESNVTERFRPLYMNADFFYDVQKSPRFEITWLFQCFSTIFAASSFSAVDAFFAVLVLHLCG

QLNNLKENLKSLSSVGARSEETYAVTLADVIARHEYLDKFAKSIEDAFNVMFLVQMVASSMVLCLQGYQLVMIITAGDGIPLFELIFMIYFTLCFMFSLFVYCYVADVLR

KEVKKDALICCIFTKFFF

>BdioOR58

MCEIKDVILGNESSSMHVLQLPFKLLTYTGIWMPVDWKLPRQKFAYVVFSIFCNGLYLMTHFSMLGYLMMARSWEEFSDRLFLIPTGVSGVHKLVFILFNRRRIVELAN

SLLKRYCQPMDGVELAIQNKYDETIRVITIACACLVNITMMNLVALPLLPSSSNHTLPLKVWLPYSVKSKLSYWITYAHQTFGILLVGTSAVGSTIMINGFLFQACAQFE

LLSHRFHKLPKVIEKLRNSEAPEQFICEFEKKAMKENVRHHLFIFSFAETFNDIFQSVIFQQFCISSIVVSVSVYQLSTRPEKNMEFIMCFFYLICVLTEFLVYCWFGNEVM

FEVKLNRKKTFARKKNNNN

>BdioOR59

MNVNYFVYSIAMLYVTLQTIMTGLSLPENLEYVDQTIDCSNELIGLALVIYKLYAYKTKAPLLAKLLGDVDANLSIDRFKSEREVAIFVKYMSYAKTYFKVSIVTGYITSA

FYFLHVFVLDGGHIPTQTSIHVPTICKIIVIFFDNSRNHLSTSDSHNVTTYLPPYRVKFYVPLVDLTTYSVAFIYLFPMMVVGANSYMVDGNLLVVLVAHACSHLAVLSH

CWLELLGDQPEQFRRHAAEAIRKNYYIMKYRYHLNNCRMMILGNSISRLQIRSRHQFGLFHHDAAAEGRRGICPVPFHVRRSSGLATRGKSSYINHCGIRVWRDMC

CFCLQLCRSMSHR

>BdioOR60

MLNVLAFLTAMVVFLKMVALTIAENKMKELLRSIANNWLAIRDEKEQEMLVQYSARARIITIFYSITMAVCGTSISMLPSIPKILDKINPLGKPRQNIYLLEGEFFVDREE

YFIELFFCDAAITLMVTITTMAVDTMYIVATEHCCALNAIISHRLRNLSKKSLENSSKGDDDDSYNKMVQIIKLHQTAFSFTDAINDGYSLNFLFIMTVNLLIIPLDVCAI

LAHLHNPISLCPYALLFVAVMIHFFVIFLPGQRVLNHNLGIFKDAYCDDWYILPLRTKKMLLIFMLRCNQPASLSAGGLFLVNFETYSMVMRTAVSYITVLASFR

>BdioOR61

MEVLPVPFAVLTYFGIWKPTEWTSNWKKNAYNFLSFLVLFLMYSFVASELIEVVVYLFKYKDISETLFILLTTSSVCFKAVAFLMKKRDMMYLGDMLRENYCTPKNEDE

KMIQKKYDDINSIVTKVCLMMVYGNVLSMLAVPFFQTSEDRNLPFKTWLPYSIDSRCSYWMSFGHQFLGLLCCASVSVANDTIVTGFMLQACAQLEILEHRFRILPKY

VEKARKYMADKEVEWREENMLKQHVLHHNHIYDYISNVVDIFNSVIFVQFCTSAMVITVSVYQLSMKSPGTIDFIMVFLYLMSMLTEFFMYCWFGNEVTVKVGRVK

>BdioOR62

MSLLHNKLFKFFLKSVGLWPNHFNIIGPLVIVSIVVTIFPFELWNASNEANNPVALMDVLSVFLAKLSIFIKICIMWKNKRKVDDMFTDFLKDWSKTEPSTEKQVLVSVS

HTFFIIVISMYASSFSIYCLGSVITYFNKPVENRTLFLPSFYPFHYRRSPVYEGICIMQYIQGSMLCIADAVIHCIFLTLILYASVQIESLNSCICKYSNNLDGHDKNAGDLVK

DGLSSRNTHMRNIVIQHSKILKLVEKINDVYSYVSFFQMGLNSLPICAVAFVVVTAMESADLLLLAKFILFTLAMLEQSFIFCFIGQYLQNKAIEGFY

>BdioOR63

MKVIHFLLMLKLLYYKWRQRSFRSMYQHLKNFWQISNDPQERRLYERPANLANLVTIAFYLMGMMYNLLNFEFIALFDWMANRREINDSLWHRSLLVEYYYGIDTQ

RTSTYGIVFISQNLCCLCAINAFIGCDCTMLVFTAHVFAQFKLIAARFHDIGLKTMSKQLVVENELRFEIGKLVAQHQHTIRVAEELNALLSPLMFCQIMSSGLQICLGG

YDLIEGFNIFKFLVIFLTLLIQFVVMCAPAELLIQESSAIAETIYHDMPWFKLTPSLQRDLGFVMMRAQKKCHVTAFYQVMSIRRITEVFNTAGSYMTLLRSMKN

>BdioOR64

MDDLVKAYYRDYKGAMVSVLLVSGMWPDDSKQSRVLRTILNIISVSMPATLMFGVVNYTIHSPRNILLLVGQIGLVISFGTVCTKMMTMAVMWRGVKSLIGGLSALFE

SDLKVPENQPHLLAYYRPFYRFFKVYYIYCLGLTVLSSSIPVLAAFRGHYVRVHRIRPPFPYTPGGAVHWIIFVFEVSATALLSLNSIGIDSVFGLFSLQMVGELRLLSHRLR

SLKSGENYRRELKECIDRHCMLIDQKYMMDRVFGLTSFLLALSCAAITCSLIYHLTQSESVSLIQAFFAIDYIAVKLVQAFTYAWFGNTITVESERCV

>BdioOR65

MYITIVLYDLLMHVRDDWLRPKTEEERVIMKEKARTSRLVSVTILIVSQMTIYSYLIAFLYNRVKIMRMANDTIVKPYYCPSKFFYDSSDGIAYELHWILQFISVFFATMTF

ASVDLFFADLVMHLCGQLIILSKRIEKLSPALFDGKGQTVETFLAEIVERHEHLNRFAGHIEDAFFIILLLQLVISALVVCLTGFQLMLMTSTIQGMSISDLLFMASFNLLF

LFSIFIYCFTCENLRTESVDVRAAAFRCSWPELKPSQARCLILIMIRSNKAYEITAGKFAVFSLELFCSVLKSCMGYISMLAAVRVRVDDE

>BdioOR66

MFESTIGLVTVFGSLAQCTSLYFRVKSVQNLYDRIKIDWETITDKREKIILKEFSRQGYVLTFIFMGCGIIGYIWFICLTYLPLFLDKNIANDYSKIFPYYSHDWIINDNYRKL

QVFVHASLGCLYAGLLFITVTTLYICNVKHICAIYAIVGFRLRKLLHVGNVRILVKMKNSTRRSDDKIISELLDTIGKHKEAYMGVRTLNRVFSRMLFTIEIFLLGCLAMLI

FDFTYHIEKSMLLSSRIAVMTLLYVGFVFYVNYAGAQVIEYSNAVLTSTHYMQWYLMSTDIRKILLMIMQRSLKADTLDAGL

>BdioOR67

MEKYFGTEINICRAVLNTFGLWPATNRKVNLKIILRFTYLAVVCLCFCNIPQTVKLFESAGNFDEMIEIMTNCDVTMMVAFIKALNMWFNREALARLLDLMLEDWKV

AKTTGNNMIMQKYAKLSHLTSIILFWVCESAILAYLILKSYNRFKESQTFRDGHVNLSERIRPLYMPGTFPYDVQKTPYYEITWICQIMSSVSTGSTFAAVDSLFSALVLHL

CAQLKVLRGQLRDLLANSVMKERACNDLDLSVIVERHKCLIWFAETIEDSFNLQLFAQLISSLLIFCLTGYQIVVVRHISFFFYLSSH

>BdioOR68

MQENALIARKMSRICAILGFATVHGHLTIRIGQELELLPGKPSTRLPFIDSYFPYDYKPTPIYEITWILQYAGAALATFAYSGIYCLFVALMLHLCGQFAHLKERMVVLVD

ESGDKFETKLAEIVQRHDKLNNFAATIEKIFNPMLLAEILGCTVQFCMQGFLLITLTTSNEMGFPVLHLLFMAVYVMHIGTHLFICCYVAEKLRDESSSMFRAAYDCQ

WYRLPPREAALLIMVMHRSKMPLKITAGKFCSFSLSLYAKVCIYYDYINLCVAYYNQQNHFQIFKTSGGYLSMLLAVRDRLAM

>BdioOR69

MFHDWRNVNDHRESMWENVRLCKLIMTGYVILTYGTVVVYALGMLILLQSHSSELDTGIINSSTSKPMFVISKFFFETDSSPTFEVIWLCQFVTATLSISAYTSFDGFFIFS

ILHLCSQLSILRTRITMMNFQMQSKQFVFAKVFKPIVKRHVHLQNLTYCIENNFNKVFLVQMICYSITLCLQSYQLVNCLTEEMENTAATLAFIVIFTSANIMSLFMYCF

VAEKLQKESTDTFYATYDVCWYELNSRESISLMNLMNASKLPLKITAGKFATLSFAYFAKVLKTSMGYLSMLLAVKSKH

>BdioOR70

MKCFTEKKDIIRSMRANWLLVMREAEPHNKKLMLSATMKAQSRSNMYFFVVGATAVLYITMPFLRDSEFRDRKYPFFGRYYFDRDSDLIYYVCYLSQMLTGTMIGLA

NYVTDTMFLVCAYHFCAQIQILHNDLMDLGYDGTPVAHSQLSNLIKRHQAEIKNAQALQSMFSQSSLQQVLLSCLMICMNGFKLIISLSNQDVDFVMYLTCLMLTLL

QILCYCQPGNELIIQSQSLDEAIYQSAWIDMDKSSIKNLIFMIQRSQRPLAITAGKIYVLSMENFMRIVKTSMSGLSVLQAVHRRDG

>BdioOR71

MKTVHSRIANNWQHIEDYCEREILHKYSERARTMTIFYSAWMMSTGVIAGALPLFSKILDFIRPLESPRPNIYVSGGEYFFDRETQFLPIFFADYIAIMLLVSVTTAVDTM

YFVSVEHCCALYTIVRSRLLALRLKMPKNSPETEDIDSYEWLRRTIQLHQDALEFTSLLNDSYYMPFMFTMIAGFHTIPMNSCAIIANLNNPLQMLPYAMILVAIMIHGF

LFSYAGQKIIDHQLSLLDAAYDNKWYEVPLRTKKLLLTFMLRCSEPVIITAANLLPINLEVYFKIMKTAAFYITVASSFR

>BdioOR72

MDVLPHHFRTLRFFGIWYESEKQHWLVKYIWQPLNINILVFFAILQLGALSIYRDNISDFTECLFLSLTYVGLCFKLINWLSRHDTMNRLLDEFRARICQPRDDSERDIL

KKYKRVVALVFNIHMGFAQFNNFTFAVAPVASMLAGNPEVFLPFKTYEIYDKNDSTYYWVTYVFQVMANDIGIFVNISFDTILAGFLLLTCGQIDLCCHRFLMANGKE

IKRSVKECVCASDVDKEDREEVGIVFYVRRRAADVSESDHFLYQYLQYFSDKHQWGRNGHIFHVSRVSTVSTLLLLLVRK

>BdioOR73

MVIQMRKPPHYRTLNEVDHQVGYSLLAVCVFNSFPYIPLALDAMMPLENGSRPRLYPYHPDYFVIDAEEYYFELFTFHGIFVVAFATLAPAAIDSMMVANIIHACALF

AVVCHRLENIGKLSESEKSGSRLADDRLVNRQCKKVCQLHLSSINSVGQIQDSFSMSFLIVMGAGMVAIGMLMFDFLYSLDPFDIIRVGLIVVLMFGIQVCLFYMNWV

VQQVINSSEEVFQYAYRSEWYNLSVESRKLVSIIMQNSMKPVALSAMSICDLNLQMFAAVVKTSGSYATVMLSMQNT

>BdioOR74

MEALDIYDSYYFRINKMLLRFIGLWPYDSKNKKMVTLSWMIFILNFPHIAGIVVHLLNWDKLLEHLCIFFILAGLFLKYVTVAIVEKKMSSVYNDIAHNWLMITDEGE

KRILVKYSKKGRTLTTAYMSVLASGAIFFTCLPLVLEILNVIDPLPIPRPHIFILNGEFLVENPNDHFIMIYLWESVSVILTCLICTAIDSMYMVSVEHGTALYAIVSYRLKRL

QHRKINDSQDATNSSYAWIIHTVKLHQAVLSFLENINDSYSLNFMAMTVASFIFIPAACVTINNKPYIVMR

>BdioOR75

MTRIDHQTVFDDVSLPYVGLLRIIGLLPFKDRDYSFLGTRLLLLLFVGTSIINWTMVIGHSYTIRAVTVDTVCEIVLVFGMHLRYYVILSKRPRLLTMMKECRAIWTECMT

ERGYRAVCSFERQLRVLLILFLFTFSFITVLYTSNAMQQRLPALEPNGTGHRMLPHKWYIVDAEAHWPGYWITFSIQQLVVNCSSLITAGCDTASPFLMTMMSGYLRYL

ADYFHSSGELESACTHRHYNEFIRYVKLHQRILTYEPDCIVEKFTCVNFMLVLDSARSWKILAGWYFSYK

>BdioOR76

MINLERGYNLMMICLKVLGVDPSASEEKYRRLSSFLWWFYLLNYVALLLPTLYTFYSAMNDDSRDLMMMSLTSIELRAIIENIVILLNCKLQMKQFRMLLRVMRNSVV

EQNSATIGTSLVVKYIKICLLIPTMYCGITYLYINEIEWESEKKLITSAIYPFKLDSAVKKVFVLINQLVIAVQCSSLYIFDGIVALLICMCTVRLKILKDKLKTFEDRNFKQLV

REHHEILKLIDDVNGFVGILIAKTAFSFVSSTMTTVIQWNRQRTMNELTLPFLMIVVFGVRLYIC

>BdioOR77

MRERAARARLITVADHAVILLSYLGFVLLPLAHFELRSLSNLTDHGPRHLLLQSCYPYDYSASPYYELTHAAQHVAGFFITVCSTVPENLFGALVFHSSAQFEILGLQFR

RFFDLGSPARPRHTRRKLRALVDRHVHLMNMVTGIEDSFTYVILAQVACTSVMICSAGFQTIALFGGGHNEPSPFQLVTLLGIIFTMMMHTLLECYASEILASKSQGVS

TCMYNCRWYAVSNHPILRDLIPVLRISQIPRQLTAGKILTLSLPTFCNILKTTAGYISMLVAVTTR

>BdioOR78

MDIFDSPHFRLNKKLLRVLGLWPYDPQRKIIRICWIIVTLVMTAPHVIAMIVDVSEVDKILEHACIVLIVAQGFVTYVALAYSENEIKTVYNNIANNWLEIVNDEERRILF

EYSKRGRLLTIIYMSLVMTTGAAFMVMPLVPEFLNAIDPLPVPRSHLFILNGEFLIDRDKNFYKIYMWDTASVFVVVTLFIGMDSMYTVTVEQGTALYAIITDRLSKLRG

RLLSDLQGASDSSYEWVIHIIKLHQTVLSFMDNISNSYSRCFFCLSIINVVHLPITCVVVRKKL

>BdioOR79

MIMSCDWQSISASHLWYFRLFALVPFEGKTFDYLGTKLLMAYLSFFNIFYITCYSFYSTVKLSQKVFEVDYICETITVYGNVFRFFTLYISRKHIVKLVDDSCELWSFLRSDE

DAETLKTFERKARMSRNFLLINTLSVVTIFYITFFAMIAPIPKEQWPTVFRYYVEVHAEPWYTTVQILQFIMGYTIAVQVAAVDNVGLYLTMMACGYLRVTKHRILGAI

DQLKDEETLHDEIVDCVKFHQQIMLYCQGIELTLRKYFLVTILTTVYNVSIIGVKLLEVRRR

>BdioOR80

MADDYETENSIERWSNLISTSHRFSKFDYTLYLGNSAMYYLQLILNYPSTPVEDREMMMRAHYPFDYKSSPIFEIMTAIQIVLGLVMCLLQALSESLLVALILHLCGHIDLLLE

RIEEFSMSCVNNPTNTSLVLVIKQHLKILNLFHKVDKVYTYASFVQVFLSTFIICSVGFITLTITDDIVIVVKFFMFGISVTWQGYSFCFFGQRLINQSEKISNKLYEALW

YNADSKHVRDLSYIISKTQKPLTLTAGKFTFLSAQTFTTIMKTSFSYISVLRASIK

>BdioOR81

MRAIGVWPLDDSQTLKTRCKFLLPGILLLFFIIIPQTRKAIQARNDLNLMLEVLTTADIIEGIALLKLLGMWYHRIGLKKLVREIARDWDRTSPGEQQVMWSNARLSK

WAAIFCYSSSTGSVITHSMVFLITTTKDYQNSSIDKSLFLKSHFPIDTSHSPTYEIISLCQCIGALLSCAAFSSFDGFFVCSILHFSGQLHNLKHRFRNLVTKGNTDTVTFTKL

LKLAVLRHQHLISHTDLIENSFNQTFLVQVFATSIALCLQGYQFVMVNECKTHSAC

>BdioOR82

MVLVLGIHARYYVIVKRRAKLLAMMQECRAIWHECINEEGRRTVSAFERKVRVLLMILIGSCFFVAVLHNGNAIFRKLPALEPNGTRRRTLPYKWYWQNVEEHWPG

YWITFSIQQIAVNGSLLISVTCDTVAPFLMTMVSGYFRYLADYFHSRAELKSTYPDQENHELIHHVKLHQRLFKFCTELEQFGRLIFFIQILTTGYNLSLAGIKIIGVSGHS

TITGKFIYCLLTRGCEKCIFLQIFIIHKAHLSRSSCTSNVVIVPPVYRRIRTSTNSYPSC

>BdioOR83

MFKQARRGRLLSAIGYITMYTHLTLFLVGPMIDLRLRIINNITDPDPRRFLPVSSYYPYEFYKSPYYELTYLNQVMCLVTSATAFSTFDNIFSVFIFHATGQCEIVTQMMYR

LYNGTGQMKFVDRIRELIDCHNRLIGFVKAIEESFNFIILFHMLNSMMLICSVCYGYVKASNGTPSVVDIVMFATALFNFNEHIFIYCMTAEVLASNSLEMFNSIYGSNW

YELPAKEARYVILILQRSRHPLRLSAGNFFYLSLNSYVQILKSTFGYVSMLLTVS

>BdioOR84

MTLECCLFGLFVFSLFLKLVLGSKDQAKRRQIYVRIAKHFESISDPEEVAVLNEGAENGFKYTLVYICIVCVLVGIFDSVPIVEAFYDYLFVHGELRLQLPLPMNFGFDHL

KYWYLITLDYIMFIYSGILVDLGYDLAFMLLIRHVKALFDIVGIRLRKAGEINDEFENDVMSEDAANEAYSLISSAIDLHSECLKLIDLIEGCYTMGFFVILLLSTGCFGGSI

HVISTKVNDPVETFRYFSVFLLVVIHFQVVFSRGQLIIDSAEGILDECVFTNY

>BdioOR85

MDILPYHFRICKIFGLWYDNSHYLILKSIWRCLVFLMLVLFNLSQIIELITGRGSVEETVEVLFTTLTYILCLLKIFNFVLRYNEMYDLLEDFRISLCQPSTKEERKIFKDYSSK

INYVSLSYISFSHFAGIAMLCKALLSYYKSEYNLPFKVYQPYDITIHRYYWISYSIQLFAIIVGITLNTTMDTIGYSFIMLATCQYEIISSRYRNFTKPIKDCIEHQVLLQEIVLK

IQKNFITIIVPLFSSSLITFCVSIFHVSQVRILLAYYVHTLILCL

>BdioOR86

MQSNVRTSKWLLRFLIFIMFGTMIIYDVEYLVKFGANTVRLNDTIYRPLYLTAYFPFETHESPVFELISVGQCIGSNLSAFAFIAYDGLFGFSILHLSGQIYNLKIRMRNLVQ

EHRITGVPFTRCIESVIQKHSHIVSHAEVLEESFNNTILLQVFTLSVALCLQGYQFIKVFFSFLFHPPLPMIIQKYRLSQSLYDRIPKLTTDMNVEPALLIFIIFYTLTNLNCIL

VFCAIAQVIRDEVSRKFIENPFASMLYFFSESKSVRRDLPDAVVRVTP

>BdioOR87

MISFPNHAWKILIQLEKLAGYWPYGSKIKSSILRICIILVLCSYIIPLVLRIIKEWHSHFYIILENFLVISIIIIVTTKILVASLFQNTRQRMVEQIKSHFENVDDEEEVQILNKHS

EKGWKLSIEYVVVAVTCCGLYDIMPTIEMSFDYLFNNGTIEKKFPLYLDYHVNEEEYFLQILAHTCITLTVGMIAEFSFDVTFFITVQHNCALFEIVKHRLKKTSDIFDKSD

KNEPLKDVDEKRAYEIVTSAVDLHNEALTLAKSLNAAYNANFIILLF

>BdioOR88

MHIFHRKISIYFTTAVFIAIILRCIAPLVDQSGEKMLPVDAYCPCDISNPGCYWLLFWHQSVGTGMATLVHAAKDCLIIALLLQTCAQLEILKHRLLSIAETSKEAHAKN

MTHDQIALLEKQLIADCILDHESIFEFSTILNKSLTVMLFGQIAVTLPNLCLSIFLLSRQSIASVEFMMTTQFFSAVVIELFFFCWYGNEVTLTSLDVESAIWEMEWETLTN

SAKKDLLYMMVRTSKPILFRVGPIMNMNIDSFLKIMKSSYSAFSVLQSTGV

>BdioOR89

MLRKPVEQSEGWKDLEWSLGLNRVALRMLGVWPEERHLAKEPWSVKMRVPLLILVTLLWVGLPQMCALYLVIDELPLAIDNFVTNCGSVTACAKYLFLWRNKHGK

CFSSLGVALPIAGEPWPARIDRRGLAAFRRQCLELDCRSAVAGDRFGEERLAAGEARLGARAHDRARGPRQALHRGRLLAAGRLLRWLYVPAPARLQHPHRQQHH

RPRPAPPSLSDLLPLRLLAQSVLRADRAPATVRRLLHRPLRLHAGQLLWRAGLSRERPVGDTR

>BdioOR90

MRIWRRKSVVQNVASHSESNFSATKHQITTTRSADDNLETYFNLNIKMLLAMSIFIDLDGKTNFEKFGIFAKIPILTVITIVISVTGAFDQFVWMVQASSYDRQLATTLST

NIFSNISSVSKGVCLSVAAKDLQSILINLSRMWNTYRPEAECRESVIKRAKKTITFVKGYIWMTVALIANFSGPPLQYIFFQYVGLNPTNTTFDYSIRIFLLKYPFNVDSSLV

YYSVLCHEFWILFGLTLCWVCCDTLFASLTTHLSIQFEVTENDTM

>BdioOR91

MTILFLYEALINIGCACVYLLPAIPKIMDIVSPLPNPRQKIYILESELYLDRETHYQFYYITEVVTSIIYAISGASIDVMYFVCVEHCCALYAIVNYRLRELRSAMINSSTNTEI

DSYDYVTGIIRLHRIALNFTTTVNEAYSMLFLFILITNMGAIPLDALTVISNLDQPFNCARFGILFLLFGVHLFMLFWPGQNVLDLSSELTDAAYCNEWYTVPIRTRKML

VIFMIRCTQPSSMDAGGLMVMNFETFSTIMRTAISYITVAASFR

>BdioOR92

MLTLKTVGQENKRYNLKCAPFSPFIYVCPIHLYFYEKYLFSSPLRFLIFYSKNEATFHLSSTTTFRRNTRILCMTYTVSVISYAYMPFFISDVEDRVLAYREWLPYSLDNVN

HYYLTYLHQSIAVTIAAFGNAVAETMVSGFMIQICAQFAILEERFKRMPLVLNEMRENQNSEADILSAERSMMARLIKHHLRIFELTEILNDIWVFVILVQFIVSIFVLCV

CTYTLAFMKVINSDFLSILLYLFCMFMQIFLYTWYGNEVTLRV

>BdioOR93

MDYSKDCPYYKINKLLLICFGLWPNQSNFSKYFNGFIFAIWTTTASVAIAQGLTDETSTDPVTFSETLVALVTIIGEIRQWTYLHFKAKMIKRLFNRIEHDWEAATDPDEV

AIVKKFSQKANLLMNIYYATGLISYTWYVSLTYIPQFLNKSNAKDYSKIYPYYSQLWIVNENFRSTQIFVHANLGAFYAGYMNLTSTRFYISSAMHICAMYSIIGYRLRNI

VKKAERVEEDILNQLLGIIAKHKEVIKSAQILHELYSNNYFI

>BdioOR94

MDIFKSRYFNFNRQIFLVMGLWPCRTRLIRKYALLSVKVVIVIPILVFVLQVVSMIVNFHDLDRFINNLFFFLVGFHLTLKVVAMHIAEDEVCVYFYYRIEFFIIINLQMQK

VYKSIADNWKLIVDEKEKEILVEYSERGRKKAIAYFSYIESVAFSLFLSPTIPKILDIIIPLPEPRPRIYILETELFLDQDTYYVTYYLVDVVSIIIYAAVAVATDIMYIVCVEHCC

ALYAIIKYRLRNMATMVSSTGAKVDCYDYAAIKLH

>BdioOR95

MGLWPYGPGKRNIRKYILLLIQFMLAIPPLISIIVNISDIDRVMLNLVAFFIGLLMFFKILVLIVAEEKMKGLYRNIADNWLAISDDKEKKILVHYSDLGRKKTLFYFGLVQI

GTASLFTLPAIPKILDIMRPLPESRQNIHILESELFLDREIYYWLYYLWDVVTIIIEGTISVSVDTMFIVCVGHCCAMYAITSFTATINNAFSMLFLYILIANLATIPLLAVTVIS

NLDKPFNSIRFGMLLILLAVHLFMLFLARTKCS

>BdioOR96

MLLITAATFMVIPIVPELLNAIDPLPVPRSHLYVLNGEFLLENRDDYFFQIYLCDSASIICVIVLFMSIDPMYMVIMEQGMALYAIITYRLLKLRQKTVDVSQDKTNNFYE

WLVHTIKLHQSVLSFTNSIEDSYSACFFCLSIINIIHLPVTCVVVMVHLDDPVNLIRYGLSLASLLIHVFILFWPGQRLIDHSTRLLDDAYCNDWYITSAKTKKLLRIFMLR

CSEPIMITAGGLVEMNFEVYAQIVKTAASYVTVLASFR

>BdioOR97

MHYRAIFDTVPVLRSFYNYFCLHDELNVQLPIQMDYGFDHKKYWYVILLNFSMFVYGGILVDVAFDLSFILQIRHAQALFKVIEVRLKKASELAISEYEGESMSEGVAD

DSYSMISKAIDLHSQCLELLDLIEETYTVNWFLILLLNTASFAGATHLIFLRLYDSIETFRNSFIYVLFLLHFYVIFSQGQTIIDSSSAVSYACYDCDWHCMPKRSSRLLTVM

MIRSSIPCEITGAKLFPLSIETFGVMLKAGISYYTVFRA

>BdioOR98

MSTAAITGPTFPLIPKLLDIVKPLENPRPNFYVLEGEYFIDRDTHFTLIFFMNYITMMLIVFVVITIDSIFIVSVEHCCALYAIIRYRLLELRRIVQGSSSATENGDSYEWLRRT

IQLHQNALNFVTLLNDSYSAIFMCVFIATLYVIPLNSCAIVANMHNSIHLLPFVLYFVGIMIHGFCMVFPGQRFIDHQLHLLDAAYSNEWYTTPLRTRKLLLIFMLRCSL

LTTLTAGGLLPVNFEVYWKILKTSASYVTVAASFR

>BdioOR99

MDAKTVKNEDGKAPLLFDEMCRMYINVHKLITILPFEGCKLSFIGSRLLTGYFVFFSIIHCTMFVVYCYNASQLEVEVICLTVLVLGVNSRYYMWLFKRKAFAPLLEEC

RDLWNFCDEEGRLIVSGYERKLRRVYMIFYTNAIFINVTYAADAVMTRLPPLEPDGSERWALPYKWYADNTEDNWPGYWVTFCVQLLVVFNTITYSVTCDATMPLFA

MICSGYFKHLQHRLLASQANQDPILRKRELVHCIRFHQKLLK

>BdioOR100

MYHHIEDFWNISDDPQERKNFERLANVAKIVSIVAFLSGIADGLGFEIVALINLIRNHRQAINGSVYHRPRPMQLFYGLDTQRTPTYEMIFVWQSVSMLYSILTINGSDTI

IMVYIVHLAGQFKLIGARFRKVGRSIDDNYDEIHTEIGKLVAQHQNTIRIWKELNELLSLVMFCQIMSSGLQICFGGYAVIKGDSSKAQIITFLAFFVSLLIQLVEFCAPAE

LLIQESSAIAETIYHEMPWFELSPSLRRDLGFVM

>BdioOR101

MFPGVLPAVLDLVNPLNESRQKFLCFYGEYYIDQQVHYYKLFFHTIVCVLCTIILFTTIDSTYVNCVQHVVGLFGLVDLNLKKALKLTENSCKSKALELKMHKYVLKSIS

LHIKSIELSNKRKKLLIILKYSNLQKCYWYRFVDLLQSTYTTCFFLTTGVVLIALSLGTVDLMMSTSNTVNFLRVMFAWCGIVVYLFYVSIPGQRITDSSLAISESMCVYYY

SFFNLKEKKILNRTFFIQFLFRLARISSGDRKTY

>BdioOR102

MTNTQDPCVMFDKMVGIYLRTFRWIAVLPFEERDYSFIGTQLLTFFMICVSIVHWSMITVYCFTASSVEVADICFMAAVLSLNLRYYMMLYKRKTFASLFNKCRALWSF

CNPEGQQIVMGYERKFRVVCGAFFFSCCAINAASALGAIVTRLPPLEPNGTERRILPYRWYAENTEDMSPGYWPNFCIQVFVNLVASVYVVLCDSAISLLAMICSGYFR

HLKDQLSSFQRDTGTRRRELVRCIIFHQKLFVCVSMHT

>BdioOR103

MEFQKGVEYQLFSIPFTVLTLCGAWCPDGWSKKEKSFYAIYTVVIMLLGIVFFTEIMINIVLTFNSDEFNMENVFTAIVVGVGIYKKVNVLLFRSNIMYFINKYATKQWH

KPANFEEGVIYSENLSERRRVTILYSALILAAVMLRATVPILEARTFLILPLEAWYPYNVDNIIGFFLTYFHQIISGVTLSCMHLSTDTLFVSLLMQMYCQISILKHRLQRVG

ELSLEKGFTNEEIKSLIMQRVREHESIYR

>BdioOR104

MNSVKIHQDFNQAMKLIRLLLLPMGLWPTTSEIYQRFVRPVAITVCLVTMLSMVISLCLFIALPGEDLKIRLSFIGLLGFGLMSLFKYVAAIYQVRKLAECIWNMSLSWQ

ELRNDRERKIMTKNAKTSKLLIVACVLLMYGSGMPYVTMLPLSKVPVMRGNDSLWTLTYPGYLFPNLQVKSIYNLIFTLHCMCGLVRYTVTCGIYSIVVLFIMHISSQIT

ITNMMLDKLVGDYKIFGQIISQHRRLFK

>BdioOR105

MITDPNHKREFPFPMRIESPLYESPYYEMYFALEMIATLAVGLCVSTFASYLFVINLFTATQFRILNMHLQSLCDFEINSNYKKNLQHQKEALEKLKSYVVKHQMLIGLT

KEIEDLYCYVMLEQVFGSTLEICFCGLQILLARTTLQRTILSIEFLLSSVSQLYFYCYSSHIIFEASESVSQAMYRMKWFKMTDPQVHKEFSQLFQIITIRAGRPCILTCGKFY

PLTLATFMSVSNSEYTYLEKLR

>BdioOR106

MKIKLSARHGFIILSICMKLLAIHPQPINEKRYIYLARRGLWWIYFINHLTLLPLTVRTIIQVSDDILSVSYSVMELTGMLESLIILITFKNQENRLKALLLFVKDQLIVKKLT

ADLDNSFMYVLSFLSIAVIYTTVMVMYINKPDSQVDGRVLMTTTYPFSINTTVLKVLTYFNQMLQLMHTSVILVSDGISVLILYTCTIKLKVIENEIKETENYCSFTENIHQ

HQIVLMLVKYLNLILNVI

>BdioOR107

MVVFGAFVKLVAINWFQGPRRRIYEKVFNHFNEIIDMEEAEILRDYSNKGYRYFTIYMYSNLAIAALFCFSPFTLGGYNHLFSNGKFFRNLPIELNYGAASDEYVLLILIS

LIEAGHSTCFFFPLLINTSISGALIHVISVLLSDPLEMFRHSIIFLLLLIHFYMIFSQGQKIIDYSAGMFQARYNCKWHEMSKSMRTMWIIIMIRSSRPCFSTGGKCFILSRETY

SKMLKAGLSYYTVFENK

>BdioOR108

MCRAFGNRTGKQSFYPLSMDIYDERYFCMNKRFLRCIGLWPYDPISKIVRALALIVVFIFTIPNSVGLVINFHNLDLLMEHLYFLLFVTAYFMKIFAIGIAEKQMKTVYVR

ISENWIMITDINEKEILRKYSERGRIITIGYLVYMITSLVFFVSLPAIPTVLNIINPLPQPRPRAYVFQSEFLIEDKDAHYAKIYIWDVLTGFFVIFCFVATDTTYMVVVEQYLA

LYSIVKYDIPFLLSSG

>BdioOR109

MEQLNLYLFRRNDRVRRIKPNRRTVVSYFQQRRWQLITLLEQLSGFWPQQRKLQQYPLQLYHAFVILTLFFAEANKLRECIGVDPDMTIECCLLLFVCVGMLVKLMFASI

QQYNRRKVYKRIAKHFETMRDSEEATVLSEGAERGFKHTLYYMYENDVGTICALLVTFVSVPVLRAFYKYFFNHHELKVQMPVPLNYGFDHNKYWYIIALDFLVYF

FSTLLVEFTFDLSFVLQIQHAAA

>BdioOR110

MEDEILTSYANIGKLLNFLYMSAVLSTLVAFMCLPLTPVFLDIILPLNESRPKKPLILAEFFIDEEKYFHSILLHAFFTAYYGIIPLLGADTLYMNCVYHACGMLKILGCRIES

SFRETHENEELEKENYQQIKTCIKLHQEIIEFCDDINEAFSKSFFGVLILNITLMSISGISVVINFGDINLINDVIKYGMFTVSQIFHVFSYNYMGQLVLDSGEKIIENIFFTDT

IQSGMKHR

>MmedOR54

MAILERNIFILTLVGVWKPDHWKGFKAALYYFYICLVTIVNHSFLLSGVLDFELRNIDVVVIIDNLSLLSCLFTVRYKIVTILYYRKLIEEFVNRFERDPFRAKDDEEEKIYI

KFDKFTRTISMLYPGLFTVAVSWYSVGHIFRMSPPNVMPYQGWFPYNYTIYKYYWPTAIYQLYAICSAACVNLAYDSIFCCILYYICAQTHILKYRFSVLVENLQKINEGN

DGSVNVREIERKMIGDWVDYHNDILDLVKFVKSLFSTAIFVQYAASSLLICSIAYTLSHTETRSMNFAGDFFYLTAMTIQIFFQCIAADQVTVEFADITNALYNTNWYNL

SNNVRKAMTIILAEPLKPTLINSGYFVILSLESFTKVIKLSYTIYNVLQ

>MmedOR55

MEILPECFFIFTCIGLWKPAGWTGYKSIAYNVYTVLMISIPSLFVISGFLDLVLLTTDVSDISDNVFLVLTIMAGCGKMFNIILNRNMIFYIIDCLQNKPLRPQDDEEINIKN

RYHQISRFITFSYSTMTGVGVTLFVLGKIIENGPQRILPYRGWLPYNYSQPVVYWLSAGQQAASMIIAGGVNAAFDTFFPGMMFLVCAQINIFKHRFKIMLNTLEVSDH

NNNNIADNDCRKINNIFGESVKHHNYIFQLFDNINTVFSTVIFVQYSVGSVIFCTSIYHMSDIKITTVEFVSNIFYIGSMLSQIFLLCVSANQVTLEFEDLNTALYDSKWFA

VNNSARKCLIIMMINSQKQITFTTGYIVTLSLDSFTSLVKLSYTIYNVLQQS

>MmedOR57

MQVLELNFSLLSILGVWKPRHWHGMKSIFYHIYRSIVVVINHFLLLSGILDLEFKNVDLDAFVDNLSLIFAMIVVRQKVICMIENRTSISYVLDSLGKGPFKLRDHQEEVI

FKRFTDFIRNIIIYYPLVIMSTLMTYSAGHMSVMDSPNVLPYNGWFPYNYSRTNKLYWVTAVYQLYSVFSMSTIYLTLDLLLPCIMCYMCGHIHILRYRFRVMTEKLKIM

VENEKTQDEIINAERKMMAEWVNYHIDILSLVKFINEIFSSVIFVQYTVSSLLLCTIAYLLSHTKPTTMSFAGNFAFITAMFFQILLPCYCADKLTIEFSDISTAIYDSHWYY

LSNNIRRSVVIILRQSYRPVAMTSSFFIILSLESFTKVIKVAYTIYNVLQ

>MmedOR59_partial

MKLTASPEAALQFTKMNVYLVSSWPLPKSVSKSTKIWFNVRWWTAFVSLLLLFLPLTNGVYVFRNDLLIMVKAACQSSASGQALLKLIICRFQSNRLQLLHDEMEIFIK

NADSLEKKYLLKYIKKSGFFHVFGSVSVWAVCLSYIIEPILMSHRYPTDTAYPFVVKSQVLRTILYLQQIMALFFVAAALTIDFQVATLLWFTCVRFEVLGHYFREVSNETE

LVTCIKKHQKILWYANEVKYAVRYITLTTIATTTIGVICGCFTLISVSN

>MmedOR60_partial

SHLLFTRFLRYPENCPLLRNYPIYIIAISGNYNDLFIEFVPTKIQSSRQCARRSGVCKRLTGDFRFVLSTMEVLKFNFCLLSIMGVWKPRGWRGIKAIFYYIYRSFVVIIILNS

LVSGILDLRLKNVQLDTFVDNLSLTLAWVVARQKVVCVIENRCGITRIIDSLEKTPFKLRDYREELIFQRFKKLAR

>MmedOR61

MKPLLPESFFILKCIGLWQPVHWKGFKTWIYKLFTVFSIVILFTDTGSQIVDCFVTCKTVSDYADHSFILLTMIGICIKMASLVKNRHRIFELMERLKTGAFQTNNLEEENI

LVKFDNIMKWRTVLFCIFVQMGTVNLIISSVIYLAPQHVTITKLYLPWDTKTVAGYWTAWVLQAISRLFGGPVNVACDSLVSGVMYRASAQFKILAARLRGFLLEPAN

FENSKYDYHRVEKHEAKKMAELVKEHLEIIQIITKLNDIFGFVIFMQYCVSSTVLCVTVFVFAQVRQFDIHCAMMITYTGCLYFQIYLLCSAGTEMTSESLNFVSYIYTFD

WNELKLSTKKSLLIMMLRCHRPLKFRSSQMIELSIESFSQIVKFSYSAYSVLAQSQP

>MmedOR62

MKILSENLALLFYLGLWKPSDWSRWSFKSILYTLYTILIIIISIVFFTTELLDLILVTSSINEFTNNIFMLSAILAACLKISMVLRHRNVFNIILDNLKNYLFENDTPYNEEIIIW

TRYSRTIRLITMFFMSTTFFGVTMMTYATTSINIPRRELLYRAWVPYNYSRPSAYWISTLGQLVAMYILAGVNVAFVLLFAGIMSSICAQISIFRLRFETAFSDVNKPGSGIK

RKSTEEIISKFVRMYLSIRRLFDIVHKLFSWTIMFQYSVGSIIFCASAYNMSQMKVLSFDFLSCVLYVQNIMIELFIMCVACDEITIEFGKLHNIFYDSPWYFFDNYNKKSIA

LMINNSMNPIYFTCGYVVHLSIDSFTHVLKLSYSIYNVLQSTF

>MmedOR63_partial

KIFLLLIALKIIAIVVHIDDPDIIFEALSSVAIDLMFVAMYINIIYRTKSIRKLYDRMRSDWRLLLNDEEKSSLKYHSNLGQLFSSAFAGFAYTSMAIFVAEPIFPRIINSFIETN

ETVPLKLALPLEYIVIDKEKHYWIMLIISSLLVLNISAVVISCDITYITFVQHVCGLFAVVGCRLENTPTDENNSESHTGSGSSSNSKDVSYKHLVSCIRSHRRALKFAELLE

DAYCITFGFIVGINLPLISITGFQI

>MmedOR64_partial

MEKTPIDSHCKVLDIGLHLAKIWGLIGLDNEPPGRYIAIVVFQIFNWVMTTILIILNTSDFIVNFDDLGEVSYNLGYIFPMTTGTIKAYTLLKHQKSIRKLLDDIHKPITKL

KYSSDLGALTTVRIGLTYQNMDFVIFTIACTTVVLTLVLPLPIILKTRQLPIRVVVPFDKDPDPIFELVYLFELYGLFTECLWTIIFDPITMGFIRWIDVQLIILRANYRHCHD

LDTPRATFSMEEQDYRTIKNYKYFNVTPEQRKIRAFVPFSPEEAYVENDSFVKRFKLCVKHHRRLINLIDRYNSTYSVVLFAQISSDCLLTCIGLFQMALGLKRERNVFR

DVIMLGSGLIHLAYWCILGNQLIIEVFQRYTSDKSSLN

>MmedOR65

MTKSRISDYTSLYQLTKKLGTVIGVWPYENSNIFYRIVPYIPMTLHLIISLAIFGYVGEHFPNIALVSRGLSISTSFVTTILKIVCLKINHEDLTELHQHLHPYFKKLLKDSKL

SELILKDVEMFKLVSWSLTICVATCLGSYILTPLSFIISCYFHHIEITNYPLIYPCSYPWKITSNGIVYQFHFVFETCCGLAMFFVSTSVDILFPFYIFQMIAQFREISYNITHIDD

DDDENSIIDKCVTQYERLMRCRDILEKIWGPIILWSVTTNAIVLCTVLFQISKMRSITIVKGSLLVAYVGLKLGQTFIYAWSGSCLIDESEVYRDAVYAANWYGNKRLMTS

IVMMLTQRPLTLTACNFSIVSVKIFITFLNTAVSYFFLLQTLDDKE

>MmedOR66

MDNRCLKKVSQPSSSNSSKCDAFKYTYWYLNLIAIWPLISQSLAIRRVISIIHVFFVTIMLSWQIIFRCYHVYFYAIDLDEQVTLIGPMIFILVSLLKYLAIIAHRKTLMKSIE

HIKTDWSMTKCREEKNIMIKNITVSKKITIVFSVLMYTSGVFYNFMMPHVIPLIFRSNDRNYTKRLIIFPGYNSAFDVDSSPLYEITYLFHTIAIFFCFTVLVSTCNLIVVLVT

HTNCRIQIVIVQLKSLIEDFFDGGKFSYPKMSNMIRHHIRVLEFSDKILRKLVSEICLVEIGATSILLCVDEFCCLRLLSNQDFANIVPYIMLFLALSLNILILSYFSELLNSQFI

EISNQCYMTDWYKIPLKARKYFILIMNMSQRPQKISAGGIIDLSYMTYVQIIKTGFAYLQILKASNMQSNE

>MmedOR67

MKNSIQTHRLFLNKSISILRHCGIFDFNDSTSVYRKIFIYFIILFSQSMTLIYGLTIVADAVANCTDLMIVASDGCIIAGWILVYFKIQKSYSVRHKILKLIDDIRNPIDVLLKS

HDLGVLILVKEYTIFETMDCYLVISCTVFLGTVLIFLSLLTGDLPCRAIFPFDTTISPFFEIAYFIQSYATAFNLVSLMTLEFISLEFLRWTTVQFKILSSNYQNCSSVPLKPLLSF

GFTQNTIDDITVFNVLNIEDEQKKINSFVAFEEREIDIINDCFKWRFKNCIKHHWRLITIINNLNNTFSSCLMAQLGGSLFIMCLNGYLAVTFSDNKQILVRAVIYLLGGF

LHLLYWCALGNELKFQADFLTTSQWMSGWETKYDSSIKNLVTTSMIKTMQPLEMRAGGLFVLTMETFISILKSSYSVFVLLTSVSN

>MmedOR68

MKTLSYSFMVLEFFGGWKPLEWNRNIKGKLYDMYSLTVALTMGTFSISCMLDLFYTTNFEDIVHDMAVSFTFIVNFFKLVFLKWRYNELRNVIKLLDLNICKARSANE

AYIQFKFDKKVESLVKKYGGLVSGAVVAITCASILDNTSTKTLPFNGWFPYRHNDSTGFWVAYFHQSIAHFYVAMIGFSFDTVVYGVLLQNCSQLQILKNRLENFVEIIN

EEKLNNKTNGSVFTIRDSERNLIKQCIHHHWIILQFSEQSNDLFAQIIFIQYSFSSLVLCLSVQSSTKLVFMSPEFISMILYLGCMLSEIFLFCWYSNEVTQESSGIPLAIYNM

DWQVLTTRSQKDLLIMKTRAILPISFTSGHLIELSLDSFTKLIKFSYSAYNLLHQK

>MmedOR69_partial

DQKDLNEGVKIFNWGKWVSKGLGMWPLAPNNYIFIITFFYFTIVMTLEWLDFYHSLNDLDKVISNLSDSLAFTHTYVRGLILRFHVNEMRMLIKNSMRDFDVSTFKN

SWEVEIFMDCINKGKRVTKYIILFIAITEIIWFLQPLAIPGHFVNDNGTIRYILPYQFHIVYEIQTFKSYVLTYILYIPHMFISGFSHSSTECFLITLVYYLSGRLVILADRINALS

KKPNLRKSDLNDIIAEYIRLLK

>MmedOR70

MDEMEILNSVPFESFFRTEIRILRYMGLSYFNRVFSNKEETEKWWEKITPLFGILIMSLLISMEIMKIIRVISISITLAAGIFTAMLSGMLCTFKAVRCWTHRKELFDFIRQLK

VFWDTASSNKFITKNQLNSALYARSLRNYVIVLVFALAFSYAFPVYVGICKHFLYHRDEYFFTFSRIMYPVKYPFTINSFLRYFMCLFFEQVSEILAIVYWLCGDILFIQLTT

HVSIQCEILVNRLHDLNKDNSSDDEGSRRQLVDIVLQHNQLFSHCQWLQRFFSPIAFFVTLINGLNLCFSLYRVDQQVSQGNWSHLIENTIHLINVFGQTILYCMHADL

LTEKLGEVNNAIYYSNWVQSNKKLKMMVLMIMRRAQKEYRFTVYGIITLNLRQFTKIVNTAMSYFTLLRSFG

>MmedOR71_partial

IQIICSWPLELRNIYWKIRSTLFFAYLITSDIFLAQELLDHCGTSYDITSLFGIIFAAVSGHIKILLLHIYNDNIKFIVTNFINDWSIIEDEKSRKIMRQYSSLNRILFFCILTSMFC

YTLKLTIEGLPQKIIIDNITVIERLLPLSAKCWDFSDTPIVIYAFQFTCRIFEFIIYNITSCGIDLYFFILTMHICGQVEITNSNLMNFKTITNGVFDKKKFYEIIIRQKYLFNLIN

LLRESFNYTILTVLLISGIHLNIIIIMIFIALKNNDINSVIRDAAGTIFYFFSQIFIYCYAGEKLSSVIQNSCFSVYSCYWYNFSIKTRKDIKYIMLRNSQEFHLTAGKFYHMN

>MmedOR72

MKKSPIVMRRRYLNKAIFILRFFGILTYDSSASMHLKFLNNFMRLFSMTIVIIFVSTMIADLIVNYDDLMIFADDTCFIVGWFLAFSKEQITYSKRHQIYQLINDIHNPVDV

LSQSSDLEVLVNVKECMLFEAIDCYILMSFVWILIAIINGLSAIVGQLPSRAIFPFDTTTSPYYQIAFCIQAYNVVYHLVNLICVEFISLQLIRYTTLQLRVLSFNYKNCKGDS

KKISSFNSIRKTIDAITIYNLFDIEDEQREITNFAAFENKEINNIDNSFNWRFKTCINHHQRLIRIVKDLNETFRNSLMVQLGGSLLIICLNGYLAVMFPHDKKALIRAVM

YLLSGFTQLLYWCAFGNQLKFQADHLTTGQWMCGWEKNYDRGIKNLVTTAMIKTMQPLEIRAGGLFVLTMETFISILKSSYSVFILLTTVTD

>MmedOR73

MIVDNRLGYVRFQTLIRRLLFIIGFWNTKNSSVLFRSLLLVHLSFFVLPLIGVVNFFKTHISNIFLATKGLSVLVGYSTVIMKMICFMINRKDLNELHAILEPYIDGLVEKSG

VSNDLLKGVSIFRGLCAGLTGCVTTSSTLYAIIPIMTIISQYRHHVRPLKFLHLYPVIYPWERSPTGFIFYCQILNEYFTTFSIITVTASVDSLFVYYVFQMVGMIRDISYNISTF

TDENCEETIRRCVRQYEVLLKCRSKVDKVFGPIILWSMGTNAIVLCGLIFQLSHAKAIPFLTMVLCAAYVSFKVTQIFMFAWAASKFTTESHKLIDTIYAADWIGNKRIST

SIIIMLTQRPLVVTACSYSTISIEMFSAVMNTTISYFLLLKNFDTDV

>MmedOR74_partial

RLKNVQLDTFVDNISLTFAWVIARQKVFCVIENRYGITRIIDSLEKNPFKLRDYREELIFQRFRKFARTIFTYYPILFISSLLTDSFGHMSVMNPPYALPYPGWVPYNYSRTT

QIYWGTVIYQVYAILTSGTINLILDLLLPCMMCYMCGHIHILRHRFQVITEKLQIMSESNKPQKEIITTERRMIAEWVENHRDILNLVKF

>MmedOR75

MPVSTNKIKKASLKNNDNKKDNEMYIKHTRWLFYILGLWPFMSNHLTTSKIFYALIIQIICYSVLMFSIVPSFYHMFWYDKSIKIKIALFGPTGVSVACAFKYLAVIYHLK

NIKNCLNQMKKDWEVSKSEEDWKIMTNYAKKGSNVTYFCMAVMYGGGVSHQSAAPFLPSSPTSLLRNSSDRPLLYPTSLFDPYFNTQNSPIYEIFYLSHIIMGVVVCT

MMIGTCNLGAILVTHICGQIEIIIIKLQNLAENRSHNENFVKNMSSIIQRHNKIIKLSVYTEQILREMCLIEVVAATLFICMDEYYCLMAWKNDNRIGLTIYSILLVAFIFNI

YIFCHIGELLKQQFGKIGDSIYMINWYNFSPKNASNLIMMIAISQNPQKITAGGLIELSFKGFSNVIKTSVAYFNILRMVEL

>MmedOR76_partial

MTKSRISEYRAFHDFTKRLLTIGGLWPYDNTNIFYRLLPYVQIFLNLGMALVVYGFVQKHFSNVAVVTRGFGIMTSFVTAILKVMCLVINHNDLTKLHKNLDPYFEELL

KNPKLLEHILKKVNIFRFLSWALGCCVFAVIAFYIITPLSFIISCYFHHIEIKKYPLIYPGSYPWKIPSSGFVYKAHFIFETLGSFALFFVTTSVDSLFTLYVFQIIGQLREISYCIT

HINHENDDGDFVIYKCIAQYEQLIKCREILEKIYGPVILWIMGTNAVILCALLFQVSQMKSITIIQGLLFTTYSILKMVQTFMYAWS

>MmedOR77

MDIFEEPYYRIIKNFSRVLGQWPYQSPRTKFTITSFVWIAIIVQLVPQIIAIVVHFDDRELLFEAFSAMAIDFACIVKYLNAIYRMDLMKELWDCIRRDRKLLLNDAEKRT

LQYQTNLGYFFSTGYAGFAYMTVVIFVTEPILPIFINMLKDTNETIPLRLALPLEYIIIDIEKHYWLILCISNLLVVNITTVIIQCDTTFITFVQHVCGLFAVVGYRLENTPIDQ

NDSEGHKGDYSLSNSKDVPYKHLVSCIRSHRRALEFAELIEEAYYVSFGLSIGANLPALSVNGYQIITQSHTVQQLLKYASFTIIELLHLFFLCFMSQQLTDMSLEMHESIA

DVSWYDISVKSQKLLILMTLRSQVPCKLTAAKIMDLSIENFATMLKTCASYLTMLLSMQ

>MmedOR78_partial

EYFVDQEKYYVLLLIHAYMTVPVSLGVLLYFDILLGTHVFHACAMFEILRTYLQSIHVSVCNTEISDKAKSDKIIHCVHMHRNALEYADELDASYNVAWFVLLTICLVG

LTFTGTSTVLKLNETSEAIKFIAFSTGHVFHLFFTSFQGQLLIEHSEAIFYSTYLSEWYNMPLLLKKRLIPIMMRSMTPCRLSAGKVYILSLDTFSSVIQKAMSFFTVLTSMR

>MmedOR79

MDLFDDLNWRHTKLLMSSFGAWPFQSRAKRLILATTGHFMLESMLIPEIIKLVTIRNNLKMVADCIPLLILHIMVLIKILSCHQNTQRLKNLLIRVQRDWQLNLDESEIK

ILRNDGHNHKIFMDFYYISMYSAAVIYMLVPIIPKILDYIVPLNESRPSLPFYQAEYFVDPNKYSTIIYVCSCLVTPITPTVFVAFDSIYSCLIQHSCSMFTIIGRRLQNLTNDL

NISRNEKKNDDDKFKLLVNCIRIHKDVLEFVALVEMNFTNYLFVLLGIIVIGISFTGFQTVIMANKLVDKIRIGWFGMCQVVHLYVLSYFGQKLIDHSEYIHKSACLTQW

YSFPHKTKPLIVLIMLRCKILSKITAGKLYVMSVENFTSVMKKSISYFTVLTSVQ

>MmedOR80_partial

KCVIITLKKKVFTFFTDAKYKRINFRFLFCCKAVCIQVKRKEVNELHETLDSYYDDLIRKPKLSNIVSEGITTFRRLPILITGFVTLTCTSYAVVPILSIISQWRHDIHPIKYNF

IFPTAYPWYPLPHTFIYNFHFVNEYLTTFSIIFITGSFDSLFIYHIFQIIGILREIAHDISLIDQDTNSEVIVRQCVIKYEILLECRHKIEKIYGPIILWTMKTNAIILCAVIFQLSHA

KTIPFMVAIIYAGHAGLKLTQVYLYAWSGTRLTIESDKLRDAIYNANWIGNKQLINSLVIMLTQKPLIMRAYHFTTVSIDMFSAVINTTISYYLLLKTFEPNV

>MmedOR81

MVTEKQIEYVKFQSIIKRLLFIVGLWTKEDSSLLFRSLFHIYLSFFIIPIIGVVNFLITNITNMNLATKSLSTLLGFSTVIIKGICFIINRKEVDALHTILDPYFDELLKTPEVSTLV

LNKVSTFRRLPTFITTFITIVCISYAIVPIISIINQCRHRIWPISYNLVYLTIYPWEVSPNSLMYNFHFLDEYLLTISIVLITSSVDSLYTYYIFQMIGMLREISYRISIFDEKNSESIIR

QCVDKYDILTQCCSKIEKVYGPIILWTMNVNAIVLCAVIFQLSHAKSIPFISMVLCAAHACLKLTQVFIFAWAGSLLTTESEKFRDTIYASKWLGNNKLKSSIIIMLAQKP

LILTACNLLYVTIDMFVKVINTTISYYLLLKTFEQGA

>MmedOR82

MSQDELSSYIEYENFIKIILSILGLKTSATDSNSIINRSLLHLQMSMSLLPMIGIFNFLKTYITNVFFVTRGLSILVSFLTIIIKGFCIILNRQDVNELNVILSSQYHKLISNPKMK

AAILKQVTTFRRLSYTMTIFVAISCLSYVVIPLISMINQSINGIKPIKHILPFPAIYSWNIPPDSYRFKLHFLNESLTVLSVICITVGVDNLYTHYVFQMIGFLRVIAYRMINFN

EKNKESSEIVVRECMSQYETLINCRNKLQKIYGPIILWTMGTNAIILCAVIFQLSQMNSISVSRIILFTTYAGAKFSQVFIYAWASSLLTAESDKCRAAIYAANWVGNKRF

MQSIIIMLSQKPLILTACNFTVVSMDVFMSVLNTTLSYFLLLNTFAEKT

>MmedOR83

MQVILQRYHFILFSYSKILLIFLKKIMADKKISDYLIYRTVIKKLVISVGLWPLDKPSIFYNLIPYIQIIINVFMCFGMIGYVRANFTNVALVTRGLSIMTSFLSTIVKVGSFVM

NRKDAIDLHNTLDLYFNKMLNSKQLPWVVLNNITTIRPLTWTFLVLVSISCGVRIIDPFSSVISQISQKISPIKYPLLYPSVFPWSLVPGDTLYNCEFIIELLATMTLWLITMS

VDCLFTFYVFQMIGQLREIADCFDNLDGDDDYDCQNIVRKCVNQYQTIIKCRDLLQKIYGPIILWLMVTNAVILCTVAFSATKMDSIPIGKGLILLTYILLKLVQTFMYA

WSGSLLMAESEECREAIYAAKWFGNKRLMTAIIIILSQKPLNLTACNFSVVSVDIFQAVVNTTVSYFFLLQTIEPDS

>MmedOR84_partial

QCIEFHYECGVNKFILGLIGVWPESNQKFIKRHRTLVDAIVLFVTLWIPRAAAFILLWGEIDALAQAGATNVPIALSVVKLLILYRRKNDFSRILDEMKADWKKPMTKE

EYEVVMKMATLGRRISILSTFLTLNAIWLGAIVQIFYNVETTIVENPDPRLTLNLFWVVYLPYDTSKTTNYVLTWLVHFYTSIMSAVVYGSFDGFVVVLVIHLCGQLDLL

KIWTRKLADQPDLENFKRKVKFIVNRHEHLNEIADTLESSCNFVFLPQLMSCALTFCFQGFAIATKMFTGQFNPLQIAFALFYTGVMVTHLFFCCLAGELLLSKSQDL

GYATYESKWYHLPPKAARSLIMIFRKSTKPFILTAGKFMPLTYNLFLTVLKTSMSYLSVMFAMSSD

>MmedOR85_partial

YLKISDVQVMKWITEIADFENRQFLTVFVMVILIASARIFSADIKNREFPVRIFVPFNASESPYYYLMYLAISYGILIVDYSLFGVDIMVIVIMRYLTVQLEILKTNCRYCRS

DSNKRAINLSSDKNSTIFESSELTNDLNDGDDNKDNEIKEFVMFEMQEKNLYDKDTFYWRFKHCVTHHQKIINMLNVANNCFSFCAVVQIITSTILVCLNGFQIILVSN

SLCQETV

>MmedOR86_partial

MNILQTRHFREFKIALLFLGQWPSQSPLQRYCARFVVLVAIFSIITPKMIKLIESIKDVDQVIECLPMVILHLVSLTKYFNWIFNEKKVNHLFVLIDQDGKNLTSDRDVKI

MKKWLEYIRKISLSYTTAMFSILVLYLSSPAFPKLMDMISPLNQPRGRIYLYQTEYFVDQDEYYVHILIHAYMTVPFSLAVIVYFDNMLATNVAHACAIFEILSTYLENIKY

DISKISVTNAEEHSRKLRNSIIRCVDMHKNALR

>MmedOR87_partial

CNKIIKTLKNNSQRICPCNNNYRYSGVWPLLPTVNIFWKILHLIFRIFNYSALIIQIAGMSTIAINNITDLTVAGEIGGFIIGLIMCLLKFLKFTTSYDEIMNHVDVVFNPINI

LQQSSDQGIVMCIKNCAFREEAQVTLFFLPSSFLPLLMLFFGHKQKVGLPIKTQYPINTAMSPNRELAVFFQSYLVAYCITILLASDMLVIGLIRWSTMQFAALSSNYQNC

NSKLVKRATLVSPKETFDILNKCDAMKITDEDMEIHTFLLFEENEIEKNIDDSFSLRFITCIKNHQRLMKVIHDLNATFSMFLLLQFATSLTVICLNGFQMILNLDDVKNF

MQFAIFIAAMLEELFIYCWYGNEFTWMANSLSYNQWLSGWEYVNDKNNNSDHNTNNNCDNNKLSNLITISMIQTMRPLEFKAVGIFILSMPTFLSVVKSSYSALALL

ITIMDKT

>MmedOR88_partial

NTIMYAGVVYGSMVPFMLGPLVPIFFKLMPEGLLPINSSMALAKPVMFHVEYLYDLDKYYFPIVIHSYFGTMTYITTTVAIDSMFMVYVQHACAIFAIVGNRLEHLVDH

DNIDINIYPKISNDESYSRMVKCIIEHSKALEYAQLIESANSFSFIFQLGFNMVTISFTGYQAMTKLDRPDEAFRYATFTMAVTTVLFYLSWPSQRLADESTRIIESTTRSAW

YLTSMRSRKLLQLFIQKSSVPCQLTAGSFYVLNMQNFSAVVRTSMSYFTVLTSMQ

>MmedOR89

MDRISIKTFKHKKTQVIDGYYVVHYTQLLMKILAVPQSEFELFSVKKIIFSIHIMAVISLSVWSIVFRSLYAYFNVKDFDEQIIVLTPVIFIFVILIKYFIILYRHKEINQSIEYIKN

DWKKITSQEGKSFMIENARISNQLSFLIIVLMYTSGMFYNVVMPLILPIVFKTNTHSNTSERLPIFPGYDVVFNAKISPVYEITYVFFICAVIVVFSTITLMYILTIVLVSHVR

GQVQIIINLLKLLISNITDEKTLLIKMSDLIRHHMKALAFSNHIRKTLYELCFVDLWASAIFFCLDEYCFLKMLDQNDFINMIPYAMLFISLNFNILIMCYSSELLDSQFVEI

GKETYETEWYRFSVKIRTYLVLIISISQRSQKITAGGIVELSYATYLSIIKTGFAYMQILRAADM

>MmedOR90

MTVELRSLNVLTYAGVWKPVKWKGLKGRVYDSYTIIIIISHLTFLISGLMDMGFDDFEFAAMVDHLSLVVGYVQNFPKITSIVGYRRDIINIIDKLNSYPLQLRNNEEKLI

HAKYDRLDRIITFWFPTLGMTSIAWYTMRHFVAIDTAYGLPYRGYFPYNYSSNPIVYWCTAVEQMYSVICLAVVNAGFNVFLPTMMFQVCAKLNVLQHRFKLLIEKLE

TISTHEKNYNQLRLSKIEQQLIRDWVENHIAILNLFKFSNLLFSKAVFIHYVTNTVVLCTVAYMLSQTPPSDLNFITNVFFFMVMCSQQFLQCITAQQVTIEFENLNNEIF

NTNWYTVRTTTIKSMLIIMFKTSRPVIFVTGHFVNLSLDSFKSIMKLSYTIFNVLE

>MmedOR91_partial

MEISNNNELPPCEQFFNPELSLFKLIGFGILERAFIKNNDKIYVKIFEILLILSGFMIMIILVFSEFRTLNKYFFSDLTKTGEVIAMIFGSTIIITKLFRFWISRTDLILILKEFDNL

WEINVRKRLDLKDKVNKIINASKPIRYCYFIAGGSLITSYGVRPYFLMLRYFLKQSENKTMDLTETVYPIIYPIPSGTWPGWLSCVTYEQGIIFFGIIYWIACDTLFILLTSHI

CVHFMVKIKKINFVLI

>MmedOR92_partial

NYYCNKFKELTTTMPLAAVGMTELFKFTGFLIRRNEIIQLNAYTENKFWKIKYNERDIKVLNDCNRLIMSFYPIFIGIVYTIPTQYTLLPIREYILSNGTVRILPYRLYFGVDW

MENPLYTVAYIEEILAGYGVSLCAMATTSFLFTINIYAAGQFRILQNQFTEFCSDITIFNNNFRLSEIHMKLKQLIGKHQLLLSYIYRIENLYNYFLLLQSFGIVLAMCFS

GFGVLMVTGLLKKK

>MmedOR93_partial

GKIIGVLYKHRMITHVIQLLDEKPFLLLDPFENDIKKKYDDMFSFVIRLYCMFFTAAVSGVLITQTLMAEFPTVLPFKGWFPYNYSQPNIFIVTAALQLFTFFHGAYVHVA

FDTLFLGMMLYVSVQVNVLQYRFKYIVKTIVKFNVINQNDDEGINPNKKLFAEWVEHHNHVLSLSNYVHGIYSGPVFLQYCLSSTQICVTVYGMTSVAIFSVEFISRITF

LCGTTLQIFMLCMAAHQVTLEFADLSNSTYNTDWYDLDIKTRKSIIIIVSQALKPVIFTSGYFVTLSLELFKNVIKLSYSIYNFLQ

>MmedOR94

MGTFTSESSGDFEWAIGMTKLGLKVCGVWPDLQRAKWLRVLISLRVTIATLIVVIFTLIPGLIALTRVWGNMTLIIDNLIITLPFFTAVFKLNVLWHKERDLQKLFDKINE

DWSIPRSTMEHNLMIKNATVARNVTLFAYILVTWVILIHHLPLWIGGIVPRTPTNITDGSRALVMQTIYFYEVTESPIFEITGMCQFMSSLVAGSAYTTIDCVFGFLILHVS

GQLQVLELRVNNLCSNYNKKTNYVDKRSFQRDLNTTATVHQRLIDFVEKMEDIFSMMLLEQFTAFAIIFATEGFNIISIPYQCHATNKMRAHVLLLASIGVLATSLMCA

NANWGNHNWSLSNDDIGRIHRTWSLVHRHPVNFGSLFYSRLFQLHPEVRSMFGNFRDVPQDQLLRNQDFLNLGSRVTNVLDDIIWSIHDVSANRVNLNQKWPCP

YAKQGGWKQNDMALTQNVFLDVLSHHVPNWGQADSVAWNRAWNAIWHNLSARV

>MmedOR95_partial

PSLKSRNNSNNNNSLDNIYSTASKDLKWAVGLNRAVLKILGVWYYNNQSQWQTLTFNFQTFIFVIGIFTFVTFPQTLALIKIWGDLTLIVDNLIVNLPITTCELKIFILWW

HKKVLVALFDEIEKDWHGIKNEYERNIMIKYATISRIMTICGLCGAFFSLILYQGPLTFGIVLRTITNLTDDPDNLFSLQAVYLYDTSTTYSYYLTRLSQIVGCGLSAVAYTS

ADVLFGMIVLHVCGQLEILASRIQIIADKPQYFSRLLREHVKNHVRLIRFVQDIEKIFSLMLLALFGSVAVTFCIQGFQFINVFTDTTVDLPITQMVFYMQFLSYCLFLTFV

YSWVGETLLTQSSAIYTAACDCNWISCDHNEVKDIILMIFRSQYPLQITAGNLIPLSMNTFVQLLKTSGGYISFLLAVKE

>MmedOR96_partial

FGILRGLGLWHMENNSGWRIFFQDIHCYVVIIIVYAEVLFESIALFGTFNDLEQFVASSIIYLTMIGVCGKMANIVIKRKEILNLINILKADPCWYRNAEEKNIQDKFDKTI

NYRTLAFLVVTESVIVSTVSISIVRDTPNRSMFYNSWLPFDTSTFFGYWVAYIHQVIAHFCGALVNVAYDTLIPGLMLKICSQLSILEYRLKLLCDNNYFSDLSGDVKQKE

TDAISECVKHHLQIFQLAERANKVFNIVMFLQFSISTFVICVTIYKLSQVEITDPEFTSMIIYGLCMLAQIFGTCLASTECNLKSFEIATAVYQTTWYDLNIDTQKSLFIIMT

RSSRPLRFNAGNFIDVSLNSYNQLIKLSYSAYNVLK

>MmedOR97_partial

MFNRDEKCDYLTTTSCEELWNLDITILNTVGVSLRDAFGGEYRKSNLLETTLYIVGLIVHSLFIYFALHTLYVVKNIDLDFITDFIPVVFGMSMTIMKGSTLWFHRRELFEI

LKEFHTRWIYTKTKVHLQNKIHMLINTSKRVRYCYMTSIIVIGLSFGLRPYLLLFTYYFKTLVLQSNSTIDFSVVIYPLAYPFTYQTMNRYVLLLLYEQCVNYFAICYVTCD

TIFIQLMTHTSINFLVLADDFRNMDQHIDINNDDSDNDNDGVQHMIELVNKHRSMLSICEKIESSYSRVVFFTMVLNGLDLCL

>MmedOR98

MNTNVEKEFTEAKLLFDKVGWIIQFLSAWPLNPTYTKLILFLLYLIYENLYLLIAFNDFFSIFGDLQLMTANLIGSLVQTIMMIRLIFVKFSKKVRNIIIEIQDDVCEKNYKN

PDDKKIYVQYSSLAIKFYRVTMGFGTGAGLSFFILPLQNCILSWFLHKPVFLELPYRVKLFNSNETSFKESILLYIFEAPLPVTALCFFASVNMQFIIITNICARIAILTSRIKK

VRGEVESVSAIKHIVLKHLELIRLTKKVDEIWTPVFCVEIIVLIPLLALVMFSAILALEANETIAFMTLFTYVGAVLSCLFANCLMGELLLTEREQLLEAFYLCNWYKMSIE

CKRSWLICMVNCANIPMHMTAGKIYIYSFNGFTGILKSSMGYVSLLRTLTM

>MmedOR99

MKQLSKDQKDLNEGLKIFNWIKYVSRTLGLWPLAQNNFVFFTTFSYFTVVMILEWMDVYYSLSDFDRVLDNLLENLSYSHIYVRGIILRLKIKKIRRVIEDTIDNFNVDK

FKNSSEIKIFLSYINEGKFFVKSFISFMAMTVIIWYISPLTAPALIADDNETIIYILPYRFHVVFEINDYKSYMLTYISYAPYTFIHGCSHASVECILITLIYYLRGRLVILAGRIN

ALTDKPKVEKYEINEIIMEHIELLRFGETVISTYSTSLMFYMMSATMALCVICYKILINFMIGPNKDLVQYLIYILATYLIIGVLSTVSEGLISECNKVSEAFWNCEWYNMP

PGSINDIMFCISRSQKPLALKIGKFSTFGNNTMTIVKIYF

>MmedOR100_partial

MSLVTWNSGTSYELTIYKIIMWPLGIWPLNRGELFSDIRLFLAAITQASTCICLHIEMWLNCQGLEDILDIFVLSVFSLLACMKGIIVRYHQEKLHCNVTSAVKDWFTLSL

KTNLRNRKIMMEHARIGRIVCISLMAPASGGTLSWIVFALPLPMFIPENSTSVVRNYPLQTACTFQSVTLSGYYHIIFIIQIYQLIATCLGNCGNDVFFFGLGMHICGQLEI

LKNEFRELKTTNNKSEDRKTFQNVVRRHSHLMSLIYKLESSFNLVILAQLIMSGILICIMGE

>MmedOR101

MFSVKITSYFIFREIIKGPLLALGLWPNENPSLFYRLLSYVQLPLNFGMFLAIFNFVRLHVNNITLLTKSFGVMTTYLSTTLKITCLLINRKEALELHRALDPHFSKLAQDV

QMKKIIFKKFKTLKLITWLFFSCVFITLSAMIITPLIDIAMQHHKYGKSNKYPLIYPSKYPWQTSLNGWPYKVTYLFESLATMSLFCITSSVDSLFLFYIFQIIGQLREMSYSI

TNTNEFNNDKEKDVVLRKTIYQYQTLIKCRKIIEKIYGPIILWIMCTNAVIMCVFIFQFMQMKNLPIIRLMIIFTYVLSKVLQTFIYAWSGTCLTVESEDYREAVYNMNWY

GNKNVMTSVVIMLAQKPMVVTACDFSIVTVNIFVMVLKTTVSYFFLLQTLEEK

>MmedOR102

MIVEKRLEYMKFQTLIRRLLLVIGFWSSKNSNIFFQSLLFLHLSFFIIPIIGVFNFFKTHISNIFLATKGLSVLVGYSTVIMKILCFIINRKDINDLHTILDPYIDELIEKSGLTNFI

LNGITSFRRLCKIATGFVTISCTSYAIAPIISIISQWRHHIRPIKYNLIYPTAYPWEHPPSGLLYNCHFLNEYLTTFSIISVTASIDSLFVYYVFQIIGMIRDISHHMTCFNEENGE

ATIRHCVLQYEVLIECRRKIEKVYGPIILWSMGTNAIILCAVIFQLSHAKAIPFTVMVLCAAYAGLKLTQIFIFAWAGSQLTTESENLIDTIYAANWLGNKRTMTSIIIMLSQ

KPLVLTACSLSTVSIDMFVSVINTTISYYLLLKTFDPDS

>MmedOR103_partial

KLQSVSKLFNCYRKIFFIKGMSVVLNRDDVKDLHEMLDSHYNKLIRNPKMTNVILKHITTFRWLSYVAIFFVVVACMSYIILPIVFVISQLIHGAESIKYLLPFPSIYNWNI

PPNGFRYRLHFLTESMTILSIICITIGVDNLYSLHVFQMIGFLREISYRLTHADENSDKEGSSDLIVRECVYRYETLIKCCKKLQRIYGPIILWTMGTNAVILCAVTFQLSQM

SSISVGRIILFTAYAGVKLIQVFIYAWAGSRLTAESEDCRAAIYAANWVGKKRYMRSIIIMLSQKPLILTACNYSIVSVEMFGSVLNTTASYFLLLNTFEQES

>MmedOR104

MNNNDNNIKMKTPNHRSSDIAYALGLYEILGRTLGIWPLDCHNISSIIRITFVTVTQLSMSISLIKQLLVEGNCGEITDVVDVLSLIACGVVTVVKVIIPRIYYNKMYVIVS

TAINDWKTVNNEKARRTMLRYAYIGRVVFIVQIIGAYAAGFQLIVSRLPFIMNWNNDRNYSTPMYTVPIGPSCWISSEISSFHYTAYYTFQCIQLFVVCTAYIGADTYFFGI

AMHVCGQFELLSNSLTNIYSDGQISNQKQNFSKFVERHKHLLCLANNFEETYNLIILSQVGIDALLICISGIVLLMTLHTEDLFIIIGLIIRIYLVYVQLFLYSYVGEQLRTQANK

MQLTIYNCPWYKMSPRITKDMVFTIMRTNYSFNLTAGKMYCMNMENFKNIIKTMGSFFSVLRLMFIEKQ

>MmedOR105_partial

MKSTSVETHRVCLNKCLRYFRFSGIWISDSSTPLRKLISLFCRLLSFFVLIAYILTSMADLVVNCNDLVVIVDDSCFIAGAGSAFFKICTVIFKYQKFEKLISDIHDPVDVLR

QSNDKGVMKIIKRCAFFETLDYYLWSNATFVLGFATIFLVTSQKGELPSRAIFPFDITRPSMYAVALSIQIYTVIYGLISLMAIEITMWGLLRWTTVQIQVLSYNYKNCDRN

LSRRARVLSQSQFDGVEKSNFSEIDDEEMEIKNFLLFENDKNNRQVDMNCFQWRLRYCIKHHQRIVEIVNRLNDTLSTCLMVQLAVSTMIFCLNGFLAVTFPHDKKR

LMRSIFFLLVGFIQIFYWCRFGNDLKFQADYLTTSQWMSGWESNFNSNSKNYLTTAMIRTMKPVEIRAG

>MmedOR106

MTVLENSFFLFTCVGFWRPIKWNGLKANLYNFYTAFVVITNCSFFLSGITDIDYAHFDFFGSMDLITLMLQFVENTPKVLCVMNDRSIILEVFRHFQSDPLDPKNEHEK

LIQRKFDNFNRRVNLWFPVLGFTSIIWYTVNHILLMESPTVLPYDGKIPYNYSSNKKIYLLTAVNQIYSVFSLASINAAFNTVFPTMMFQICAKLSILEYRFKLMLKKFEC

DKNNNREKFGEKNFYEIRSNLIGNWVENHIKLLNLFNSVNSLFAKAVFIHYIVNSFLLCTIAYIFSHTPFGGMTSVSYLFYFVVKCSQQFLQCASAHRVTVEFENLRDTI

FDTNWYTTKRAVQKSMIIIMSKTMIPVVFVSGYFVDLSLDSFKSIMKLSYTIYNVLE

>MmedOR107

MRNEMGILGTVPDSTEQSQSDIKYSTEMNRWFLQPIGIWPASSNIFEKIISKILVIVCYFLICFLLIPCGLHTFLNEKDPRLKMKMIGPLSFCLMAISKYCFLVMRKKQIREC

LKHIYVDWRRVRLPADRTIMLINAKIGRFIASLSAVFMYSGGFFYHTIMPLSAGNFITPDNITIRPLTYPVYAPLFAALTSPSYEIVFTIQWFSGFVLYSITIGACSLAAIFVL

HTCGQLKIVMSRLENLIEDNNKKFTDSLDNRIAEIVQIHLRALNFIVRTEKILNEVCLIEFVGCTMNICFLGYYFMTEFERAETIATVTYCVLLVSFTFNIFILCYIGEMLTQ

QGIKVGLTAYTINWYELSGKKAKDLILLLAMSNYPNSITAGKMAELSYNSFCGVLKSAAAYLNLLRTAIL

>MmedOR108_partial

LKSLDYVYYMICIKYCLLQFLVVIIFIHELIVKGNCSVITDIVDALSLIVTSTLSIVKIILPLVYRNRMYLIVNSAIEDWASIRNKQSRVIMLKFAFVGRIVCIVQMVGAYMTIV

PLIFGNPPSFYQFPSNKLEDNSTLLRNIPIGPNCWVSTSMSMFMYIAYYGLITVHLFILCTSYIGGDVYIFGIAMHVCGQLQLLYNEMENLSGKTNYFSLRKQIRQLSQRH

SHLLQLSNEFERTFNFIILLQVAANTFLISISGILLLLSLKTGDSKITFSTLIRIYLLYFQLYIYSYIGEALSTQTKKLQTAIYNSTWYEMSPLLAKDLMFIIMRTSYPFHLTAGKI

YDMNTSTFKDLVKMMFSYFSVLRLVFLE

>MmedOR109_partial

MLLPYSFGVLWCLGLWHTEIISKWRLCLQMIYSYFMIIFIYSDALFESVALVNNYNDFHQFIDGSIVLLTMIGVCGKIANAVIKRKEILQLINILKTDPCLCQNDEEKIIQD

KFDKTINYRTLAFLAVTESVIIISVGVSVLQDTPNRSLFFNTWLPFDTSTIIGYWVAYI

>MmedOR110_partial

MESSESVNKRIKWQIFFMSILGLWPLQKDNFYRKFRVGYSLSQLIIVTVSMIYQFIINCSDIDDTFDSYLVLIFSILIFIKMYYTSTRREYLKQLLISSYQDWESMKDTEDIKL

MVNNSELYNNISLLIFSFGFVSVILYDIQIVIFTDSSAKPILNDYSNKTIYKHQHKFLLPGSCIYDDVSKNLYY

>MmedOR111

MKSVENINERFKWQRFFISMFGLWPLQRDNFYRKFRIGYYLCQLIILTVSVVYKLTINCGDVDDTLLSYLLLIGSIMIFIKIFYASTHRDYLKRLLISSYQDWESIKNADYIE

LMVNNSAIYNSVSLIICSSGLISIILYDIKIIFFTDSSAVPILDHYSNKTVYKDQLQFLLPSSCIYNNVSKNLYYVILVNQMVQSYIIIAGGSCSSAMFILVTGHICGQFDILIKR

MDKFCDNNYNFEVKNHELTTIIQRHQHLIFLSDSLEIVYNKVILTQMAGCLTSLSISGIVLLLSINEKDIITTMRSACIMNLIILESYIFAYMADTLSGKGDIMLRTIYSYWY

KIPIINKNIAVITMRLCVAPYLTVGKFFNLTNESFMDIIKTAFSYLSVLRLFLIE

>MmedOR112_partial

FLKPVLSTILLAVIKSIIWIIFRRQDTTILINFLFNDYWDIVVTYCRANEFKYIDKNAKMAKRITVSYIVLIVNALFIFYLLPLRHHIIKAAGILKIGAQEPTLNVSLNFPFIAA

YPQFCYKSPFYEVVYFSQMLATSMCGLIILAMDTLIATAIFHSCGHFNVLCAKLQRINFQNSYHLTDELITIIKHHQLAIRFSDHLEYVFNPLMLFQVIASSIIICLVGFQV

NTTLKHDNKDKLVEYICYLMMALFQLLLFCWPGDKLINDSLRINEDVYLTNWYSHRFSHTIKTELILMILRSQRPSYLSAGKFHLMSIENFSTILSTSVSYFMLLQNLDV

>MmedOR113_partial

ELINIKNNLSSSNSRIIGILDYTPSTLFLRIKSNVIKVFNWAVALCVTTSLAVDVFKNYSDLEALTNDVGYLFPMLGILLKTIAVNLGQKNILGLIEAVHAPILKLRYSSEIGV

LTKIRITIFYQSLDFIIFAVVLISTGITIIVMAVLSDTKLPLRGVFPFNETVLPAYAGVFYIQSWMVAMCCLWILLIETSAIELIRWKNVQLVILQRNYENCCNWMEPRANFE

MSDDTYERIKNFSYFKLKDEDLKINLFVPFDENEVNVKNDSFILRYKTCLKHHWRIINHVDEYNDFFSVLQFFTVFITCLFVCLCLFQIAVNKQSKAAILNTGILMCSEM

CHLGFWCIFGNLLMNEAETIRQSQYNSGWEKELDSEVRHLVINSLIESKEPLKITAGKFFVLSLATYLAGCIFMLQIFVIQKSYSYFAILNTVHSDD

>MmedOR114

MKWVLMETNSPIITNSNLNKNYAVKYTYWFLNLLGIWPLIFQSLVIRKIIALIHVLIFISICIWEFIFRFIHMYYYVDDFDEQITLIAPILLIFVILLKYMAVIYRRNSIMELIN

HINADWNMIKCQEEKEIMTKNLNKCNNITFVFTVSMYISGAFYNCIMPHVIPFLIGSSNNQNTSERMIIFPGYNVVFNVEFFPLYQITYIFHILTAFLCYTVLIATCNLTV

VLVTHVSSQIQIIISQLNSLLNDFSREKKFSYSMLSLTIRRHVRVLKFSNNILKKTLFEICLIEIGASSALLCIDEFCFLRMLDKKDFANMVPYSMIFLSLSLNILILCYFSELLD

SQFMEIGIQSYAIDWYEIPLQARRYLHLMINMSQRPQKISAGGIIDLSFLTYVQIIKTGFAYLQVLRASNMQKK

>MmedOR115

MTITPIETHRRFLDKSIKILRYCGVMTFDSTASMYQKFYNNTLRIFNYVIVVFYFITLITDVIINYKDLMTIADDGCFIAGWIVTYFKIHKFYTQRHKICKLIDDVHNPVDV

LRQSCDLGVLTTMKTYMFFDALDFFLFSNCAVTLGIALVILVPREKGKLPVHAVFPFDIKKSPNYELALFIQLYTLIFGLISIAMEEFISLGFLRWTTLQLKVLSANYKNCN

SHLIECADFNLTQDTYDCIKKFKISNILDDQIEISKFVEFDRREDKKKIEKVVDCFKWRFKTCVKHHQRITHIIDDLNDVFDSCLIVQFAVSLFLICLNGFLIVMCADDRK

KLISALTYLSVGFLQLLYWCGFGNELSFQANSLTASQMMSGWENWFEIGLKNLVTTAMIKTMQPLEMRAGGIFVLSLDTFINVSEKILTLK

>MmedOR116_partial

CNNHWASTGVPTLLLSTYRIIFTILSCIFVSKEMLEHCGSMKDRILLSAHLLASVTSVGKIIILNLNRKNLSTIITNAVDDWEKTNDVNFKKIMNRYALINRTLLYMMLSP

ALLYVIKVTSDRIPYTLIIDNVTVLIRTTPLSSECSNYADAHIIIYIVRFSFRVAECFIYNLTNNGLDSFFFLLAMHLCSQLEILNIYFRQLIIDEAGVFMKDKFCKLIARQQHL

YYLLNILDDSFNLMILIVLISDFFYLSIIAFTSLVYIKEQKIMEAVVITAAISLNVSF

>MmedOR117_partial

MSQEKISDYLIYREIVKKLLIVVGLWPYDNPSIFYNFLPYIQIFVNLFLCFGMLGFVQKNFTNIGLVTKGMSIMTSLMSTIIKVVCFIKNRSDAMELHKNLDPHFNEILQD

LKLSKFVLKRFSVVRHLSCSFTIIVTISCALRLIIPISIMIKQIKHNIHPVRYPLLFPSVFPWKVTPESYIYEFEFAIESFAVVTLCFITLSVDCLFTFYVYQMIGQLREISYCFKNL

TEKSDSQSILRKCISQYQVLLKSRDILQRVYGPIVLWIMVTNAVIMCTIAFQVTQMDSIPLGRGLLIFTWISLKILQ

>MmedOR118

MTILQNKNIFKKDTEYLIGIAESIKHTRWLFTLLGLWTLMSDHKTTAEKHLNKITRIICLGLMIFVIVPAIYHLVYYEKDYKVKIALFGPIGVCIACALKYIAVIYRRKEIRK

CINELEKDWTKINNDTERDLMFKNIQKGNKVTVYFAMFMFGGGISHQAAAPFLPGTPLSLVRNSTDKPLVFPTSMFNNIFDAQIIYIYVLVYISHILMGAVVCIMTVGT

CNLGAIFVTHLCGQIQIMIYRIKSLSNTNSDINMDINNSQKQIIRIIVLHNRVITLSQNIQSILNEVCFIEILASTIIICVDEYYCMMVWRYNEMFGFAIYMTLLIAFISSVLIF

CYIGELLKEQGEKIGQSVYMVNWYLLPSKTARDFILIIAMTQHPGKITAGGLIELSCNGFTSVCISFFF

>MmedOR119

MEKTPIETHRQTLDLSALALRLCGCWDYQSTQFSLRVVNFLSRMFNWIIVMTIVITMSADAIINFRDLEAVTNDAGFIFPILTILTKAIRLHSRRKQINQLINAVHNPIEK

LRYSSDVGVLTVIRTAISYQNFDFCFFSIMLGSVFCIIFAITSDSEQLALRGYYFCNETVSPGYEIAFFLQLYTIFMCCLWVVIIDTTMLGLIRWINLQLYIIRYNYKNCKHDK

IDRADFSMTREAYEVIKNYNYFKVTDDQTKIRLFIPFDMSEVNIKIDSFTIRFKLCIKHYQKLTKNINDFNEIFSSILFIQIFLVIFFTCLCLFQAVLTMNQKAKFIKYIFLLGA

ELVHLFYYCFFGNELINQGEAIVDSIWNSGWVDHMSPEIKDLMINALLQTTKPTVINAGYFFTLSVKTFLSIIQKSYSYFAILITMMNGSN

>MmedOR120_partial

VRTSSQIESSPLQFLILFFSYRNILVFQPMIFSSALLFYSCSRKNIIDPPYILPYRGWIPYSYTSPVVYWGTTIFQFYAIYTATAINIAVDPLLSAIICQMCAQIHILRHRFGEMV

NRLKVIDNYEPDTVFAERKLIAQWVEYHIHVLSSVKYMNKIFSSVIFVQYTVSSLVLCTLSFLLSHTETMTTNFVGYLGFLTAMYVQIFLPCYCTHMLTIECLNLSSGIFET

DWFKLSTNIRKSIIIIVSKCYKPVLITSSFFIVLSLESFTKIIKLSYTIYNVLE

>MmedOR121_partial

ILPQSFFILTCIGLWRPVDWQGWKCILYDAYSYFVVVTNFAFSLSQFLDIILVRTSINELTNNLTMLLVMVTACGKILGILCNRNEIIQIIKSLEEKPFKPRDQYEINIRNKYV

YVSSVLTRSYCVYLTIGISGILLTRIPEAKLPDVLPFSSWLPYNYSNPKIYLLTAAQQIINSLISTYAQVGFDTLFPGMMMYVSAQTNILQYRFKKVIKALEKINLKNSADQ

VKNHKDAEKNIITEWVECHIAVLRLCLRNIFEACFFAVLLKLNNALRNSILFF

>MmedOR122_partial

MTERKMEKGKFINSITFEEFLNGEVLILRCMGLSYFNRVFSNSEEIEKWWEKIIPFCGILTMCLLISLEIRLVLRVIVVDITLATEILTAMLSGMLCTFKAIRCWTHRKELFD

FLRQLKTLWDTADSNKYITEDVLNIVLYAKSFRNYLTAVVISLAVSWGFPAYVVLGNHLIFHRDEYFFNLSMIMYPVAYPFTINSYSIYFSCLLFEQIAELLAIVFWLCGDA

LFIQLTTHVGAQCTILVNRLRGINKDGNGSDNQENHRQLADIISIHHKLYLYVTLLLATKIFQPHRTFCHPN

>MmedOR123_partial

NVKLLSGFTYACQWSEISLRILGIWPNSKPSFWNKIKAYLYVSFVLAAYYLPQSATIVIIFGDIDSMVNLLSYNVSGLVAIAKYIVIYKHRKVLMKIFEVMAKDWGAHNS

DYDLTIMMNNAKIGRLLAFISILYAPLIVILHILVTTYLKPDRLLLYGSIPTIANNLMWPSYFPFNSSRKYIFELTWLCQITATMGASLIYGTFDTFIAVIILHLCSQLAIVRNR

LRNLNEDMNQGLLFHDSVKKKLRAIIKRHEQLISMAESIEKTFNVILLPQLICYPLIFCFQGYAMLTVSVDF

>MmedOR124

MATDVEKQFKEAKLLFDKIGWMIQILNAWPIDRTTRGLILFIFYLIYENIYLSMAYNDFFSIFGDLQLMTANLLGTLIQTVMMTRLTFVRFSKSLEKIIIEVTDNFCDKNYQ

DPNDKRIYVQYSSLAVKFYKITMIFAAGSAFGFGLLPLQKCIFSWLLHKPVVLELPFKIKVFNHKNLSADQTVLLYMYELPLPINACVYNASISLQFMIIMNICARTAIL

RNLMKDVNVNRETTSQKLLFKQIALKHLVLLKLTKAFEQTWTPIFCFETLILVPLMSLVMFSVLAIDGNETVAILTLIAYVGSMMSCLFANCWMGQLLLNERDQLLEA

FYGCNWYAMSNECKRFWLICMINCGNIPMQITAGKIYIFSFNGFTGILKSSLGYVSLLRTLTL

>MmedOR125

MDLQVENELKKAKSLLNKVSWVMGFLGAWPVQKSLFQRIKFTIFVIYKSLFLLMAFNGLVANFDNVKLMTVFVQQIAGLSMTFNRILFINLSTNVKEIIIATQNEIRNI

DQKNLSEKMIYIKIHQTAKIYFTLTISFVFFTAVYWYILPLQRCFVAWLSHKPLVLVVPYKVKVFYFNVSSFERSFLLYISQIPTSLMQPTYVASINMQLVVVTNLCAQIAIL

SSKVRSLDLEKNSSSSNLILRDIVLRHVELYKLARKIENTWTPIYCLELAVLTPLISIVIYNAMILVGSGQKVTAIPYCTYMIVTLGSLFGHCLMGESLKNQCDLLSEAYYH

CNWTDMSMINKKKLIICMTYTNITLHITAGKFFVYSFNAYTGMLKSIMAYVSLLRTVAM

>MmedOR126

MALSEINAEDKLLLDKIIWAIELLGCWPLNRSIKQTILFLVSITYYLIHLSMSYTDLINVFGNLELMTINLMETAVQMIAIIRLVYLKLSPRVKKTIISYKENLNIERTNDSTE

VQIYDYYRSVAKLYFSIIMPFSAMTSFAWYLMPLQNCLIAWLKNEPVILVPPYKVVYVFFNLTSMEQIIVAYIYQAPMSFLPLGFIGIICLKIVIIANVCSQLAVLSYRIKNLN

FEDNNKKFSVFGYIVRKHWGLVRFIMEIDDTWTLIFCFELMLSTILCALVTYNAVMAIGNKDKIEIISLFTYVISSLLILFANCLMGEMLKFESENLQEALYSCDWFEMSI

NHKRSLLICMTRSQIPLQLTAGKCYVYSFNAYVQIVKSAMGCVSLLRTLTM

>MmedOR127

MDFEKFVDNIFNAITHIKFWEKNVSLTFSKNIINIFLNLVLLTLSSLLVISETIDIYNSYDLTSFAGHLNPVLFHSIGLFKWIFIIMKMNDIEDILLKMKRCHSICLEYHENEK

ERYQYDLQIINFQQKMIKFTQIWFFICLSGVIQWCMNPVVYDYYNIYILEIVNGNYTRNLPYPGVYPWIIDSNYKYIMTFAFQLTSAITTSIEMATSDILNVIFLSNISFNIQ

LLNETLIKEKDVLLSLRFSNSDLAIKKFKKKLRNCLIHHQEILEFVDKLKTVSSYPIFLLCLDSTVALCLISLEVSTIKINSSIECIMKLMSMAEYWSGVTVELFLFSFIATKIE

ELGLKTADAIYSCNWEQSMVNHKGKFSGEHRQITVEINQMINFSLMRAQKPILFNGGLFYILSLQTFKAVSLKLIVALL

>MmedOR128_partial

MKLSTHTKGYKVTPEGAVNFIKVTVYLTCISFPLTERTKVRIKYEILLWLSIVLSIFLFAPLLVSIIKYSDNTFIVLKSFLLMSAITNFVIKVIIVRIYHKELQQLGSALDQYLEK

ASESERVILQKYVDHTWKFHGFITCSYYVTATTLMMGPLILPQKFPTDAVYPFPVDNPIISLIVYLHQCAVGYQCSAGMALDCQTALFLWYLSARFEILILEAKNVGSVD

ELRNYIRKHQKILL

>MmedOR129

MKHSVNRQGCKVTPEAAIEFTKTSVLLTYIWSPPSAKKVRFMLFRIFMYTSVFFSVIFILSLTMSIIKYFDNLLIVMKSMAVLCGVTNFVAKVIIVRIYCKEFEQIELTLKDF

VKNANESERVILQKYVNKCWKFQFLVTCGSYVTTTLIMLGPLVLPQKFPTDAVYPFPVENKIVSCIVYLHQSIIGYHCSAAIILDCQMALFLWYLCARFESLGLEIKNVT

NYQELCYIIRKHQSLLVYAEEVTRPIHAVVFSTVTITKFIMICGAFFLLSDEPIAGKIQFGIMVMSTTLNIYTSIWPADCLLDISSKLITNEIYDMCWTWTQQMRKLCLLLIR

RTQQPVVIKIPGLLETLSNQYYSSFLSAAVSGFTALRVIVNS

>MmedOR130_partial

FITSVLRIVRKINVTKNILCISVDILIFRYRLKNAANNKYVWNKRKKIIREDRMHQLMINCIKHHNNILEYCQILKSTYNSCLLCIVMINMLALSITGFQTVMKMNETSEM

IRFGTFSIGQVVHLFFLSWPGQRLLDHSLSIHQLVYSGEWYNISTKTKKLSIFVMMRSRKPCILSAGKMYTMSCESFSKVIKASMSYFTLLTSLK

>MmedOR131

MNLDEKKIEEAGLLLGLDQMAWIINLVGAWPIQRTLKRNIIFSMYLVYHNLYLVTSYSYLVIVFGNLELMTGNLMESAIQSMTLIRLLTINLSPQLKKNIFVVRQNLRKK

HYEDSTEKNLYDKYYLIAKKYCTFTMIFTVVTSVSWYFMPIQTCVISWFLNKPVILVAPYKVHLFFNVSSIKRTVILYIFQSPLQYPPICCAATINVNVIIITNICGQMAVFS

HRIKNLKTNDSSNKVFNNIVNKHLELVRLTKNFEESWTIIFGFELVVTTILCALVLYNALMAFSADDKIGLISLVAYVYASLLFLFANCLMGELLKFESQNLMESLYICDW

YNMSINNRRALLICMTRAQLPLEITAGKFYVYSYNAYIKIIKSAMAYVSMLRTLTM

>MmedOR132

MGMLNIYWKFFMAVGLWRPIKWHGLKAHLYDCYTMFVMLMNYLFFMTGVMDINFRNLDFFGSIDIITLMLQSIENFAKIFCLVKKRNDLLNLNIYLHSEPFNLRND

DEILIQKKYNDINRIVNFVCLTLGLLSTLWYTGFNAFQMIMPTVLPYRSKMPFNYSEPKIFIITAASQCYTVVTIGIINTTFGILFPSMMLQICAKICILQYRFRMIITKLENN

DYKGNDNSSVEKTNENSPKYLIAKWVESHIALLHLFKCANSLFAETVFIHYVINSFVMCTLTLLLSRSSFDISLIVNAFYFALKCVQQFGQCASAHQVTLEFEDLRHVIF

STNWYAIDVEVQKLLTIIMSKTIKDVIFVSGYFVDLSLDSFKSIMKLSYTIFNVIDQ

>MmedOR133

MTMDIFDEPYYRVVKNSSHLIGQWPYQSPQKKVMITVTIWTAFFMQFIPQVIAIVMHLDDPDILFEAFSSMAIDFGFIFKYFNAIHKTNLMKKLYNRIVSDWKLLLNDE

EKTTLQHHTNLGRIFSSGYAGFAYTTTAIFLSEPILPRIINYFSKSNESVPLKFALPLEYIIFEKENHYWLMLAITNMFAINMIIVTISCDIMFITFVQHVCGLFAVVGFRIENS

PTGKITDSNHRAVSLRKNSQDFSYKHLVSCIRSHRRALEFVKLLEETFTGTFGVVVALNLPMISITGLQLITQSNTVEQTLKYLMFALAQVLHLFFDCFLSQNLTNMSSRI

PQCIANMKWYNISKNSQKLTLLMTMRSQTPCKLTAGKIMELSIENFGMMMKTAGSYFTVFLSMR

>MmedOR134_partial

MLLPYSFGILQCLGLWQTTERVSRWKIYLYIIHKNLMIMFIYSCVLFELIALIASFDDLDEFINNLIVLLTMVGVCGKIANVISKRKEILRLINILETYPCLCQNPEEKCIQDE

FDKTIKLRTIAYFGLTESAVAMVVSVSILCDTPNRSLPFKTWLPFDSKTFFGYWTAYNHQILAHVFGALVNVAYDTLIPGLMLKICAQLSILEYRLKSIPKKIYSSDLFIDVK

RREINEISKCVIHHLKIFQLSI

>MmedOR135_partial

MENISTDTYRRLLDIYITALRFTGIWPLLPSAKTGWKIFNFTYRFFNLALFIFYLIALGTDALDNVTDLTIFGCDGCFFFGTIMIMFKAYKFNISYDKILMLIDHVYDPIRLL

SRTSDSGIIMSIKNCIFQERLEISFFCVSCSMFALTVIFLVPREKGALPIRCIYPFDTIKSPNHEIVVLHQSYAMVYSLVVLIAMDAMTVGFIRWSTIQIQVLTSNYKNCNVHS

IRRATLISPLLTDKSVKIENNIEIFDEDTEICEFLPFYHNEIENIVEDSFFSRFRTCIKNHQRIIEMINELNQIFSSSMLVQFATSTAIICLNGFQLIVNSNDTSMFMKFFSYWIS

CFAQLLFWCWYGNQFTYLYTLL

>MmedOR136

MENIPIDIHRKFLNINITILRYSGVWPLLPTAKIGWKVFNFIYRIFNLTVFIFYLITLGADAVTNYKDLTIFGSDGCYFFGTCMCVFKACKFWASYHKIIKLIVDVYDPIDVL

VRSADPGILMNIKKSYYQESIAFWGFSTLCSFFHFSVIFLIPREKGILPIRAIYPFDTKISPNYELAIIYQAYCLAYALCVTIALDITTIGFIRWSTLQIAALTSNYKNSNPNVTK

RASLVTSSSDARKIIEKLNKIKITDDDVEIETFLPLDYHETKYFINDLFLSRFTTCIKNHQRLIKIIRDLNAVLSPLMLVQFATSTCIICLNGYQMILSTNNSADFTKFTAFLAI

CFTELFFWCWYGNEFSYIADTLTHNQWISGWEDAYDNNYYYFNSNNHKISNYVTISMIPTMHRLQFKSVGIFSLSMPTFLSVVKSSYSLLIILNTFTSDK

>MmedOR137_partial

TLRTYRLCGIWSLDSSSPIFLKLLHNISNIFGIITLIIFVGTLTIDLILNSNDLLIATDDGCYLAGISVIVFKVYEFHRQHKRIKNLTDATYQPIYVFWKSTDTGVKTVLKTNK

FYEDLGFKFFVSLGGFLVIALIFFVPTEEGALPIRGAYPFNTTISPMHEVAFCLQIYAVTYGLMAILMMDTVGLGIMRWLNVQCIILASNYRNCRANQNNSFYLESRDLS

KIASIEDDNNNVTDIYDEPDSNITTFCPFDEQDPAGMSDCFIGRFKRCIKNHQRLLNTIDELNACFSSCMLMQLFASFSMICLTGFQAVLGATTKTSLIKFVLYLGAAFS

QLLYWCWFGNELLYEVFILPHD

>MmedOR138_partial

FSDPGVRKIIKRTAFFENLMDIFFIILGCFLAVALTFFVPKVNGALPIRAVFPFDTTQTPLHELAFIIQAFSIFYGLLTIVFMDELIVTLIMWINCQLVILNSNYKNCSIDTEGQ

ASIEKKSCLSGEINELSNEKFLIRTFVLFDDETDGRIDDNFLVKFKYCIKHHQRLIVIVDHLNDIFSSSMLLQLFASFSMICLTGFQAVLVRFLRSKVTEDNIFFYIGISPQFSA

SSL

>MmedOR139_partial

MIFFLKYFLHRGHYKSVLCSSTIIVQLTTCTSSIITTQNMFKTKVYIYLIYRKMMKRLLLPFGLWPKENPTVFYRLLSYLQLPLNLGMSLAISNFVRLHANSIKFLTKSFGV

MTTYLSSTLKVNKFNKQKKNISYKLFFQITCFLINHKEALYLHKTLDLHFDKLTQDVKMKKIIFKKFTLLILVTWIFFFTVLITLSVMVMTPLIDIVTQHNENHENMKYS

LVYPSEFPWQISSNGWSYKITFIFESLATISLFCITMRVDSLFLFYIFQIIAQLREMSYRITNTNDNKEINFVLRKVILQYQTLTKCREIIEKIYGPIILCIMCTNAVIMCVFIYQL

MEKILFS

>MmedOR140_partial

MSKNIISDYRAFHKLTKRLTTVVGLWPYENPCIFYRLLPYLQISFNLILVLAILAFVCKHFSNIFLVTSCLSIMTSFMTVIIKLLFLVVNRKDLTELHQNLDPYFNGLLNNP

KLSKLIYKKMNTFKCLSWASFTCVFFSSALCIITPIVFVCCYTNEINIKKYRPTCSSDLRKLTSNGLFYQIYLAFETLASFESFFVTTTVDSLFMLYVFQIIAKLREISHCISHIE

DKNDENSVICKCVSQYVKLIRCRDSLEKIYGPIILWIMGTNTIVFCSLLFQISQV

>MmedOR141_partial

MRNNEKDNLDNIKMFNEKYALQINRWTLKILGIWQFIIESSYFSKIVAVCLMIVCINLLTFVIIPGALFAFVLIKDPALRLRITGALSYIVMGIIKYYYLTTQRYKISDCINH

LIYDWKKINEFDDKNIMIDYAKFGRQSSILSAIFMYSSSIIYVIILPFESTGINNKGNVTTLSFVYPCHFIIFNQYESPAYEIVYIMHCSCAFVLASITNATCNLATVFIMHAC

GQLEIMTLWLNDLVTPENTDKKTYSKYSAIIEQHTKTLRLVEKIKELFQHICFVEVIGCTLNICLLGYYILLVSALNI

>MmedOR142_partial

DLFLGFVYVSTVMYVTEPALPMIINFIFKTNLSAPHKFSVPMEWVVIDKEKYYWILLNNSGVCISVILSVLVSCDVIFITVVFHACGLFAVGGYRIKNLTNAKYCKNNLA

ELKLSTNIDDVHYVHIVSCIRIHRRALEYFNLIESTFAGCFGVAIGFNLPIMSITGVQIITQTNTMQELIKLALFTIGQIMHLFFECFLSQQLTDMSSQIQQDIVNGEWYNIS

KKSQKLLILMTLRSQVPCILTAGKIMGLSLESFGMMMKTSGSYFTVLLSMQ

>MmedOR143_partial

RKWKIQVPFVYERFEYAIKWSKISLTLLGIWPNINYSISQKINVVFDIIFFITTTYLPNLGAIILMWGDIDSMVHLLSYNMATAVSIIKYIVFYKKRNVLASLIEFMKEDWIDAESSGNVNKMMSNAKIGRTLAFISIAYTPITIFLYIIVEIHLKPATMFLYGQHPKILTNIVWPSYLPFNLSIYTLELMRVCQVTGLLGASLIYGTFDTFLAVLILNLCSQLSIV

RNQLRHVCSNSRDTELTKYKFDKELRTIIQRHEHLMK

>MmedOR144_partial

SGAGITMAISILSEINLNCGEVNDVIQMYSLAACCAIVIIKITSLRYNNKKILAIITSSIYDWETVTHPKALEIMKRNAKLARSVCLFQMISAYLTTVMIIIGPLPYIALQINA

TLNSSDMIFRPLPLRTVCFYGEMSTKMYSAVYILQAIQTLSTCTANIGCDCYFFGIALHVAGQFEWLGVEFETLNTKASENECRKSLATLVSKHNHLMQLSNYLEDSFH

SCIFLILLVNTVQICLNGMQMIISVRTGDAATAINAVIIIYVMNLQIFLYSYAGDRLTSGIANLHVAIYGSTWYDLPQKTIKDLSFIMLRVNKAFNITAGKIYPMNIDSFKSI

FKAMLSYFSVMQAMFEE

>MmedOR145_partial

IMISGIFIIQELLDHCGTSYEIASLFGMIFGTISAITKISLLNIYHKNISFIVKNVINDWRIINDNNCKTIMRRYSSLNRVLFYGILTPLLLYTLKFTIDRIPHTIFTNDNTTIYVR

TTPISSECWNLADIPTVFYIIRFACRTFEFVIYNIVSCGIDLYFLVLAMHICGQMEISNMNIQNFLVANDDRFEREKFYKLIDRQKYMLGLMDELRESFNYITLAVLLISGIH

LNIMIIMIFVALKDNNMNAVFEDAAGTILYFSAQIFIYCYAGDELSSKVENSRLAVYSCSWYNFSINTRKDIIYIMLRVNKEFHLTAGKFYYMNLLNFTNIVKTMVSFFSV

MRLVIFE

>MmedOR146_partial

MTDKERALVEKEFDNVSSLLMWSKRFLTIGGIWPLDATYKRATVWTVYLTFHLIMEYAELLAVYGDLEMMVLSVLESVMQSMVYAKLFVFRYSIMLRHLIHAIIEDFE

NKYYDNWEEKKIYLEYNVLAKLFYKISMPYIIVAASLYYLRPILTYYVIMPLVTDTSNFTFLVLPFQLKTFIPIETTQSYFIMYGYLSPMVYLLVCHNAWICLLITMVLHICG

QLAVLNHRIKKIPVDIDEDKVQIIFRRLVRRHMRSVWMAKTLDDTFHFVLLIDLVGTTMLLGLMSYIVIIVIK

>MmedOR147

MNHTNINMQNSERKCSLAKKEFYLYEFLTSNIGLWALQKDNMNRTFRIFYATVQMLVAILATVAGFLIGCGNTEEYLDCYLMVVFGVLVLSKIYYAYTYRHHLRYILNS

AFRDWKYIRKKDEVKIMMNSSRFCNNMAAMFYISGMISLISYVLKTMIFDDPRKIIVIDSLNITYKYGHSFILPGGCVYDGVNQYLYYFILINQCVQMTIMCFTNLGND

TMYAAITGHICVQFDILIKRMKKFGQFKNDITVNSHELGNIVKRHQHLISLTENLEKVYNRIIFVQMLITVSVLSVGGVSLILSINSNNMMNIIKSAGVMNFMLFESYLY

TYPADNLANRAELMLRAIYSSCWYKMPQSITKNLILVMMRINLPPFLTCGKFFFMTRRSYMDVIKTAARIYQYYE

>MmedOR148

MYENNDFLEFENFVDSLHNFFTHIQFWKNNATSVGQKIFDIFLNVSMLTLSILLIISETIDIKNSYDLPSFAAHINPICFHLNGLLKWCFGLMKLNDIETLLVKMKRCHR

LCLNYIENEKEINRYNMKMLKYKQNMMKFSYIWLFFTIYGVTQWCLNPILYDLYNDIYSEKMLNSSFDRHLPYPGLFPWNVDTLSKYIMTFSLQYISAIAAAIEIAGYDI

LNIILLVNIYVNLQHLNKTLFEQAENLSKFSNKVDTIEVRNKLKMYMIHHREILEFVEKLKKVSSYPMFILCLDSTIALCLVSVEVSTMRIDVIIIFLSYIDNVTLCMENIFM

CYLKILFMLKFKNFDADNHQL

>MmedOR149

MEANISVRNLSLPSNNETSVKDYEWAVNYHRKVFKLCGLWSYSKPLEWYIKLLTDVHSLFIVACIITSLTIPEVMALTKVWADLTLIVDNFLSSIPLCSAQIKLLVLWTKR

KAIGKIFDAVKSDWLEPKNEFERQIMIKYARIANIMMIIGITNIAYNLIIFHGCVIFGFSFRTTTNLTDIEGYLIATQTVFPFDVTIGYRYWIIRIVHAVECYLAGTVYTGIDV

FFGMSVLHNCGQLEILGEKIKCMVNSKEPLIFKKLLKTIVLRHYRIISLIEEIKDIFSSVLLLLVMCFGITFSVLGFLIASSLGSSGTQVPFIQMNFYLGYIFFFVGLMFVYSW

VGENLVTHSEGIYLAAYNCDWTALDSKQTAQLLILLVRSQKPLEVTIGKFAPVSLNTFAQLLKTSMGYISVLLAKQN

>MmedOR150_partial

AACIVINRKDVNELRTIFDSYFERLIRKPELLNIVLNGVSSFRLLTIIGTVLTTIICTCYALFPVISVVNQLKQYSEPIKYNHVFPIIYPWNDSFNNVVYYLHILNENLTSFSLI

VITSGVDSLFIYYIFHLIGMVREISYLISSLNNQDNIEATIKQCIFKYELLLKCRDKIEIIFGPIILWNMKTNSLTLCASILQLSNAKSTPLVLIILCIALTSLKIFQAFILGWTGSR

LTIESEKLRDVIYAADWLGNKQVMNSIIIMLSQKPLVIKACQFATVSIEMFSAIINTTISYYLLLKNFEIDS

>MmedOR151_partial

KIFELIITSVSQAFVYSACIMYILEPMIPWIISIIYKSNNPVPRKFSLPLEYLIFDQDKYYWLLLIISNVFLLLIMSVVIACDVLLVTCVHHVTGLFAVVGFRIENPPPRVEIRQS

DSQKNNFSNLRDAQYEHYVSCVKAHSRALKYAELLETNFSISLGAVVALNLPLMSVTGVQLITQSNKIEQTIKNVMYIVAQSVHLYFDCFLSEKLIDMSMNIQRCIAKA

QWYDNSTKSQKLLMLMTIRSQKPCKLTAGKIIELTIENFGMVLSNCFFNTFIKISSFNIYAARRN

>MmedOR152

MKELLNEGVKVFDWARWISVGIGVWPLTLNNYIFNIAFFYSTVVLIFEFIDLFVHIYDFAAVVDNLSESLAITIDYSYTFSLRFYHKKLAQVFKEALMDYNSASAFKNLG

EVEVFMMYTNNAKVFTKYIIISIAMSEFLWYIQPLTTPTKSNNSADALAIDNEMATFSLPYRIYAFYEINSLKNYVITYVSLSLFAVINALGIMSLNIFLIILVFHVSGRLAVL

AIRIDDLQKNDSQPRDEFVDIITEHIKVLNRLGNDIADVFSTPLLIYFLLTNLLLCILGYEILLNFMSGLNSDIMQFIVLLSTVYLMLFIICMNSENLASESDNVCQAFYNC

NWYNLPKNTVKDIIFCLVRSQKPLFLKAGKFATFSYITLTDVRFYF

>MmedOR153_partial

IFNIRFCGCWNYDSSKFSLKLVNFLSRTVNWACCLCILIPLAADIIKNIKSLEIITNDMGYLAPLYSTFLKSIKVQTLQKEIGQLINSIHKPIDKLRYSSDVGVLTKIRTAICY

QNFDYSLYASVLSFVFCAVIIISASVSDTGLPMRGYFPFNETISPAFQIVFLLQFWSVLINCAWALLIDLLLIGLIRWINVQLYVLQNNYENCRPDISDRDNFSISHDNYALI

KNYNFFKVPEEQFKIRSFVAFQMDEINVKNDSFALRFKTCIKHHQRIIDSVNDYNDLFNSMLFVQIFNNQSVACLFLFQGVLVRILLPHCSA

>MmedOR154_partial

FLQINIKIQKISSFFTYKIFKVICFMIRREDLTNLHKTLDPYFNEMLKDSKLSKFILRKVNTFRYISLVYAVLLSLCSVFYIVAPLIAIYYCHHHKINLTKYPLIYPTTYPWKIIS

TGLVYQIHYIFEILASLTLFFVTTSVDSLFTFYIFQMIGQLREISYCITNINDEDDGKSAVCKCVTQYEKILKCREILEKIYGPIILWIMTTNAIVLCTLLFQISQMKSITVIQGIL

FTTYFVLKMIQTFMYAWSGSC

>MmedOR155

MNLSVEEKFEEVKLLIDNIAGFINILGGWPIEPTLKRQILFYIYLVYHIVYLSMGYNDLFEIIGNLDLITGNLTTTAMQTIVLVRMLYVQFSKNIFQIIMSVKVGILEKNDYS

QSEKEIFLSYYPLARKYHKVTIVFAFVAGFSWCALPLQNYFISLLLNRPAILIAPYRVKIFFLNATSFKSTVVIYILETPLPVPPICYVAIVNLQVVLVIYICAHMAILSQRISN

FRLENKSSYRKFCHLINAHLEMIKLAQNIENTWTPIYLFEMLVLTPIVALVMYYGLLAFDAGEKVAFISLCTYVCAAMSCLFANCLMGEMLKTECERLFDAYYHCNWY

DMPISDRGVVLTCMTYTKNPLTITAGKVYTFSFNAFAGIVKSSLAYVSILRTLLV

>MmedOR156_partial

RYTSLIITLTFAAVPLIFHRNIFDMMRGFFFVAAGLIDLYVITLPADDLHDLSTKISSGIYESNWMGSSLSVQKSLIIMMCRAQKPLVINVEGILPALTCQFYAASVSFIVSFF

MTLRALVVDK

>MmedOR157_partial

GFVYMTTVMFITEPLLPMIINLILKTNISAPHEFPVPMEWIVIDKEKYYWLLFSNSSVCIMVILTVLISYDVIFITFMHHAYGLFAITGYQSFPNLLELNPDLSWFKLNVFSV

DIESKICLVMQYVKTILHPEQMYHQIQMMSIINIWFRASEFTNGLWNMLI

>MmedOR158_partial

LMCYQRFAELIETTFSTSFGVVVALNLPIMSITGLQLITQSNTVEKILKYLMFALAQMLHLFFDCFLSQNLTDMSSHIPQCIANMKWYNNSKESQKLILLMIMRSQVPCK

LTAGKIMELSIENFGVMVKTSGSYFTMLLSMQ

>MmedOR159_partial

IVFFNYQFFFSLVDKICIGTRCICKYRLLHSIGLEFIGSYCNWYDVIKLHQPDEAIKFGAFTMGAFFHLFYSSFQGQILITQSEKVFYSIYESEWYNLPRYHQNLLNIILLKSI

KPFTVSAGKLYILSMDTFSIVLKNAMSFFTVLSSMR

>MmedOR160_partial

IIAIVTHFDDREVLLEALAPFIIDIVCVAKYINSIYNAELMVTLFERIKKDWRLLPRDREKKILEYHVDLGRLMSVGYAGFAFITTVIFVTEPILPRIINKFTKSNESVPLKFA

LPLEYIIFEKENHYWLMLIITNIFAINMIVVIISCDIMFIT

>MmedOR161_partial

NETIIYILPYRVPSIFEINDFKSYVIMYSFYGPFIFIVGSSHATLECFLITLVYCLRGRFVILADRINALNDKSEVGNNEVKDIIVEHSKLLR

>MmedOR162_partial

QHTKVANLNTTYHNSLVEFVKSLFSTAIFVQYASSSLLICSITYTLSHTETRSINFVGNALYVIAMTIQIFFQCIAANQVTVEVKYFYLNTNNYTFINYKTKKI

>MmedOR163_partial

SIKITRFCMSGIGMWHVEKPRDKIISNIVLCYTIATTIIALIVEGFDIYHCFGDLHAISYTAPCTITVVIELFKLTKFVINRSEVMAFNDYTFRKFWSIPYIDSERKILDDCNK

KSIKIIIAYITIVQFLVWQ

>MmedOR164_partial

TPMKFSRRRLEKLTADQNIINIKRNSINEENGIKSLVICIKMHKEILRFAQLLEENYSNYFFLLLGTIVLGLTVTGFQFVVLATEFGEKIRCLWYGTGQIIHLFFLSYLGQKLI

IHSEFINESM

>MmedOR165_partial

SAHTKNISGIIEHALYVFWSGFSLIIYCWLGEVLGKKSDDIARAVCEIDWSIKKKKKSLSLMLIIIRCRKPFAITAGKIFTMNLIFYKECILASVSYLSVLIAIGLGKLL

>MmedOR166_partial

MKHSGNSREFKVTPEKAVQFTKITVFLTCAWPPSNESRLFKLFIYSSVFLSFALFLPLVVSIIEYHDNFFIVMKSVIFICGITNYVTKVITVRIYRKEFQVCI

>MmedOR167_

partial DDDDDDYESNKIKNFVMFEMQENSVFDEDNFDWRLKHCVIHHQKVIDMLNVINDCFSFCVVVQILTSTILICLNGFQIILGNDSFHLLMRRFLAITVVLIQLLFWCWY

GNKMSSAAESLTINLWMCGWENEYKYGIRNTVSIPMILSLQSFELRALGLVPLSLQTFVSAIKTSYSVLILLLTVAKDQ

>MmedOR168_partial

MQVLKFNFFLLSLMGVWKPRGWSGIRAFLYNGYQVFVIIVNLIFILSNLMDFKLENFNLEAFADSLSLVFALSIVQKKINCVIENRTSITHFIDLLYKNPFKFQDHQEQLI

FSQFDKFARSVFTSYVVAHTGFLSIYSLGRMTLMDPPYTLPYNGWFPYNYTYTPKSYWMTAAFQFYAVFSLGVIDLLLDLLLPCIMCYMCGHIH

>MmedOR53

MVVLKDIFTILFYVGLWKPATWHGRKSILYTLYTSCIVIMASTFLITEVMDLIFVTSNIVEFTNNVFMMS

AVISSFIKTIIIIRHRKIIADIIDVLKIYLSKISGNEEIIIIDRYTRLIKFMNRSFLCTALFGVSLMVYV

ASSQNISQHILFYRAWLPYNYSQPMAYWMTTTGQVLTIYVLTIIYTVFILLFSGIMFNICAHINIFKYHL

QITFSDEYYHSRNDKRRCISKKENDKKIIHDCVETYLSIRRLFNTVKNLFSSIMLYQYSVGSIIFCTSAY

NMLQVEIFSAHFFSITLYMLNMMTELFIICITCNQITLEFQGVPNALYHSLWYVTDNNNRKSIVIMMSYT

LKPVYFTCGYVIDLSLDSFTNVLKLSYSIYNVLQSTF

>MmedOR52

MEYNQDFKYAVAWNRTSLRFVGLWPEPNDGFFTKLKGWLGAWSIFMTIYLPQSTLAYVNWGDMNAVIESL

SINGPILIAIIKIIIFRHYRDVLKLAIVTMTKDWNELRSKEEYKVMLKTAKISRIISVTSTIITNTLFIA

FVFFKIWIGMQLMKRTDLDPRLSVGLLYPGYLPFDSRIMTYFIPTWIAQCFATCFSMTAYAAFDTFVSCM

VLHICGQLAVIGVSLKNLINDDVKVDSKVFWIKFSEIIKHHEEINKLGLMIENSFNSILLPQMFVCTVTF

CLQGFAMITSFIDPSAGEISIFEMLFSIVYVFYTVMHLFVYCYVGDYLSFESTLIGQSYYKSKWYELPVI

KSRSLMFIGHRARRPLLLTAGKFCAFSRNLFLAVLKTSFGYLSMLLAVKQEKISDT

>MmedOR51

MKRKEKKNSQTKKKINLTVFDDIEYTQQLLSILAIWPLVTKSSTIKKILSWIHLLVIIGSLIWNILFRCI

FIYIYVKKFDDQIMLIGPTFFRVIILLKYLAIIYHRKTIKKIFNHIQTDRSGVECQEQQNIMMRNVQINR

HVTLVFAIFMYSSGTFYNFVMPHILPLLTHRGSRNTSQRLTIFPGYNVLSDVQKSPIYEITFFFHIFSVF

AGFSVLVLACNIAVVLVTHACGQIQIIIGQLNSLIDDFTNNEKTLYIKFSSIISRHIRVIQFSNNIIKDA

LYETCLVEIGASSVLICIVEFLLLKMIENQNYANMIPYAMLLASLTLSILIICYFSELLESQFIEAGIQA

YSINWYQLPPKARKYLILIIIISQRSYKITAGGIIDLSYIAFVQILKTGFAYLQLLRATK

>MmedOR50

MKFFNHPDWRIGKLMLCSFGGWPYQSQHSRRILNFISIFTVQSIFIPEIFRLTRIWNSMEMIVECVPMIS

LHIVANIKMFNCIINLNKVKVLLEDIERYYQSDLCKSELRILYKDRHSHKKVISVYVFYIYSIAVVFASI

PVLSKVLDLIAPLNESRPKVYLYPAEYFVDQDKYSTYIYIHGYMALPITMTLCTAYDFLYSACGHHVCSM

FKIAGSRLKNFIDNKIAWSKNESLDRNYRQDEVYKSLVECVKMHKFILNYVDCYQETFSDSLFLVIGVNM

LALCITSLQSLITMNQFHDAVSYIVFAFGQLTHLFLLNYQGQNIINHSENFYNDAYQTNWHEFSRKSRKL

YILIIMRSSEFSVIRAGKIYVMSSDSFSNVLKTAMSYLMVLNSLR

>MmedOR49

MEVHSRDQRDLDKGVRVFTWARLMSKCIGVWPLEPNYHLFNICFFYFTYIMITEYINLYYCLPNFKKVLG

NLVENLAFTHIYVRTLMLRIHIDKLRDIISESLKDYHASAYKNSDEVNEFLIYVRKGKFFVKAAGIFVIS

TATSWYIRPITSPSLPNNETAAFTYILPYKFHIFYKISNYRTYVLTYLSHAPFAIISGVGAVTSAWLLIM

LSFHVTGRLAILAKRINSLKDKNGGYRSHLDEIISEHSRLLEMGEGIKSSYAIALLIYFVNGTILLCIIG

YQILVTITLGVKHNLMPYFVFILTVYLVISIFCILSENLLAQSNKVSEAFWSCEWYKMPQDCVKDITFCI

LRSQKTLGLTAGAFLTFSNSTLTDVTKTAMGYLSILRNFLIVE

>MmedOR48

MEVHSRDQRDLDKGARLFTWARFISKGIGVWPLEPNYYLFNICIFYFTYIMITEYIDLYYCLPNLKKVIN

NLTESLAFTQMYVRAVMIRVHIKKLHHLMSEALKDYHVSAYKNSDEVYEFMSYVKRGRFFVKSVTIFILS

TTTSWFLRPITSSTPSTSMSAPDNETAAKFTYILPYKFHVFYEINNYRTYVLTYISHGPFPYVSVLGAIT

SAVFLIILSFHVSGRLAILARRINALNCKNEGFRTDLTDIIAEHTRLLEMGEEIKISYAVALLVYLVVGT

TQLCIIGYQILVLITMGKQHSLMPFFVFILTTYLLISIYCILSEHLLAESKKVSEAFYSCEWYDMPQDCI

KDISFCILRSQKTLGLTAGAFLTFSNSTLTDVTKTSMGYLSILRNFLLNEQ

>MmedOR47

MSEKATNSIITSKIVNSKYALDANRWILKILGVWHFAIDSSYFHKVIALCHIIICTFLLSFVVIPGILFI

FVIVKDVTTRLRISGVFSFCVMGVIKYYYLIKSNKQIGNCVKQFNSDWAQINDIKDKTIMVKYARFGRNS

SIICAAFMYGSCMFYACILPHVSGVFKNKNDPTERTFAYPCHFIVFNQYESPAYEIVFSIHCCCAFVLAS

ISNAACNLITVLITHACGQLEILMVWLNDLDSCQQNEVYAEKYSKIIKQHVKTIRFIVKIENLFQQICFV

EVVGCTLIICLVGYYVLLDWNQKDTGGMTTYVMLLISFVYNIFLYCYVCELLTAKCKLISESTYLTRWYQ

IPENFARGLVLTIAISQNSNPIKAGKLIPLSINTFGTVMRTSVVYLNFLRKLME

>MmedOR46

MKVNPSDQNSTVIQNQSSEPENIVNNEQDFEWAIHYHRKVLKFCGIWIYSNSNRWYLKLITDLHSLFIIG

GVLICLTTPEAMALVKIWGNLTLIVDNLLSSAALISTQIKLFVLWTRRKAIARIVEAVKSDWLEPKTEAE

RKIMRRYARIARIMMVCGLSNIAYNLITFHGSVLFGFVYRTVNNITDIEGYLIPTQSVFPFDITIGYRCW

IIRIVQALQCFGAGITYTAIDVFCGMSVLHNCGQLEILADKIKDLVNPDEPRVFQELLKTIVLRHYRIIG

LIEEIRNIFATVLLLLVLCFGILFSVIGFLIASSFESDGTKVPVSQMNFYIGYILFFVGLLFVYSWVGEN

LLSHSEEIHVAVYSCNWTDLEPHQIAQLIIILVRAQRPLEITIGKFAPATLNTFAQILKTSAGYISVLLA

RNG

>MmedOR45

MDVFDSMHWRTTKKLLSAIGLWPFQPVIQRIVVGAIVYFIIQSIFICVFLKLIVAWGNLAETLYSVPILV

YFSMIQVKITNCHLNLHKAKFLLLRVKRDWESKLEDSEFEILRNDGRIHKIIMDVYFSGLICVATVYIVL

PLMSPLLDIIIPLNETRERILPYPAEYFIDIQKNFFMLYPHGAIVTPIALTVLVGFDSLYAGFVQHACSM

FTIIGRRLENLTVDRNNIDEEKNSLNERHGLQSFITCVKMHKDILQFVKLVEKYYSNYFFVLLGVIVVGL

SAAGFQFVVLLSGVGEKVRCLWYAMGQVTHLFFLSYVGQKLIDHSQVINASLSAAKWYDYPQKMKPLIIL

MLMRGKRVSTVSAGKIYVMSIENFSSVIKASMSYFAVLTSMES

>MmedOR44

MENDQKELDEGVKAFYWAERMSRCIGLWPVTPNYYLFNICLLYFSVLMVLELIDLYNSVYDIDKLIDNFT

ENLASTHMYARILMLRVHNYRIGEMITQAMKDYRISAFKNSYEIKVFMEFVNKGKFLIKGLFIFIMSTEI

SWFLKPLTTPSSSDNSIVNANKTFPQFILPYNVYIFYEVNSIKRYVLTYLSFMPMVYVSGIGHSAVDCIL

VLLVFYISGKLSVLTMRIDALKNNQYDCRKELKEIIAEHSRLLKMGDEVKDVYSTGLLVYLVNGNLLICI

IGYQILINYMTGPNSDLLQYFVYIGATYFMIANFCIISEHLTAESNKVCEAYWNCEWYNMPQDCVKDIIY

CIVRSQRPLALQAGKFSTFSIVTLTDVTKTALSYLSVLRNFLIAE

>MmedOR43

MSKSRVSDYKAYRGLTKTLLTVGGLWPYSNSNIFYRTLPYIQIILNLGMALAILGFVRDHFSNIALVTRG

MGVMTSFLTTILKVTCLVINKKDLMELHGNLDPYLNDLLKNSPSTEVILKDINSFKFLSWGLTLFAFIIL

HCHQHEIELINYPLIYPSVYPWKIISNGWIYKMNYVFETLASLILFFVTASVDSLFTLYVFQMVGLLREI

SYSIRRLDEKNVNRDSVICKCITQYEKLMRCREILEKIYGPVILWIMTTNAVVLCTLLFQISQMKSISVT

RGLLFTTYITLKMIQTFMYAWSGSCLTDESENYKDAVYAAHWYGNKRFMTSVIIMLAQRPLTLTACNFST

VSLKIFVMVLNTTVSYFFLLQTLDYQE

>MmedOR42

MAILERNIFILTLVGVWKPNHWKGFKAALYYFYICLVTIVNHSFLLSGVLDFELRNIDVVVIIDNLSLLI

CVFTIRYKIITLLYYRKFIEEFVNCFERDPFRAKDNEEEQIYVQFDKRTKTLSILYAGLFTVAVSWYSVG

HVLRMSPPNVMPYQGWFPYNYTVYKYYWPTVIYQLYAVCSGAWVNLAYDSLFCSILYYVCAQTHILKHRF

SVLAENLQKINEENDGNDNKEIERKMIGDWVDYHNNILDLVKFVKSFFSTAIFVQYAASSLLICSIAYTL

SHTETRSLNFAGNFFYLIAMTIQIFFQCIAADQVTVEFADITNALYSTNWYNLSNNAQKSLAILAEPLKP

TLINSGYFVILSLDSFTKVIKLSYTIYNVLE

>MmedOR41

MKQTATKEGLGRKGFSVTPETAISFTRITVYLTCIWSPSTSSTKLTFILFEIFLWFSIFLSLGLLFPLIV

SIIKFIDDTFVVMKSFILISGIVNFVIKVIVCRIYRQELQELGASLNDFVRNSNENEKFYLQKYVDKCWK

FHGYMTCSYYLTTSAVLMGPLVLPEKFPSDAVYPFPVDHPVVATIVYLHQCIVGYQCAAGMALDCQAALF

LWYLSARFEILISETVNIASHKEIQDFIKTHQDILKFGKQVIRPIRLIVLTTVTMTKVGMIFGAIVLISD

EPITVKVQFAILVVSATVNIYVCTWAADNLLTVSSSTISNEIFHVSAIHPPAMKKLWLTVIHRALKPITI

EVPGFLETLSNEFYSNFLSTAFSYFAAMHAVVNS

>MmedOR40

MSMQYSQDFKYALAWNRTSLKIVGLWPEDDDGIITKSLGWFCACLIIIIIYLPQSASVYVYWGNMDAVIE

CLSVNGPVFITIVKIIIFRYYRRVLKRVIDTMAEDWSSSRSNEEYAVMLKTAKISRAISVTSTIITNSLF

VAYIFFKIWEGLEMSKRTDLDPRLSVGLLHPAYFPYDTKKIKFFVPTWIAQLVATLFSMTAYAVFDTFVS

CMVLHICGQLAVVGISLQNLINEDTNSDPNYFWSKFSKTVERHEKLNELANVIEDSFSSILLPQMIICTV

TFCFQGFAMITSFIDPLAGKVSILEMLFSIVYVFYTVLHLFVYCYVGDYLSFESSIIGQSYYKSEWYKLS QDKSRSLMFIGHRARRPLKITAGKFCAFSRNLFIRILKTSFGYLSMLLAVKRDKSA

>MmedOR39

MTAGMIAARIDIDVFLEAIPTVLADVICGIKMFNFSVNAAKMKKLLLTMEEDWKIYASGPENKILNEYAH

FGRKVTIYYTGALYGTLAPLVLVPITPLILDVIAPMNESYPKHLMFQQIEFLVDADKYFFPLFIHNYMGT

VAFLTIIIAIDTMLMVYIQHGCAKFAILGLCLERIATNADQNIDRHTSEFDDIDYREIVKCIVIHNRAIE

FANLIEEANHLSFLIVIGINIIMMTTSALVAVFKLAMNETEIAGRFAFFTLGEICHIFYSSWQGELILKH

SESIFYFVYQANWNNTSTRSQKLMVPLLLRSAIPCRITAGKMFEMSLKSFSMIVKTSFSYLTVFASMRV

>MmedOR38

MKTLPYSFMILEYFGGWKPLKWGTSIKGKLYNMYTLTVAVTLVTFCLSCIIDLFYTANIEDIVHNMSMSF

TLIVVCSKLTLVTVKRNEIIRIIKLLDINICRVRCAKEANIQLKYDEKAKNIVKKYGGLVCGAVFAVTGA

SILENIPTKTLPFNGWFPYRHDNSTGFWVAYFHQNIAHFYVAMIGFSFDTVVYGVLLQNCSQLQILKNRL

ENFVEIINEEKLKDKINGLSRTIRECEHKFIKQCTHHHWIILQFSQESNDLFAPIIFLQYLSSSLILCLC

VQLLTKLAFMSPEFIFIVVYLGCMLTQIFLFCWYGNEVIMESSEISSAIYKMNWQVLTNKTKKDLLFMKT

QSILPIKFTSGHLIELSLDSFTKLIKFSYSAYNLLHQK

>MmedOR37

MEVLTFNFFLLSIMGVWKPRGWRGIKAILYNINRSIVVIVNHIFLLSGILDLEFKNVDLDAFVDNLALIL

AMVVVRQKIVCVIQNRTGVKHILDSLAKGPFKLRTHQEKLIFSRFDDFARNIFTYYPLVFMSSLLTYSSG

HMAVMDPPYVLPYKGWFPYNYTRTTKIYWTTAIYQLYAVFTTATINLILDLLLPCIMCYMCGHIHILKHR

FKEMIEKLLVMSENNVPQEKIISTERKLLGEWIEYHIDILRLVKFTNELFSSVVFVQYTVSALLLCTIAY

LMSHTDTMTMSFAGNLAFFTAMFIQILLPCYCADKLSYEFLDISTGIYDTNWHYLSNNIRKSVVIILRKS

YRPVIITSSFFIVLSLESFTKVVKLAYTIYNVLE

>MmedOR36

MEILTTNFFVLSLVGLWKPRGWSGIKAILYHFYSSIVIFANVSFLISGIMDLEFTNIDIAAFIDNVSLLL

SLVTIRQKTACAIGNRGDIKEIIDSLGRSPFKPQDEEEENIVKRFDDLTGYILKYYPVLFTVAITWYSIG

HMFIMDPPYVLPYRGWFPYNYTTTGVYWLTAVYQLYAICSAASINLAFDPLLPCIICHMCAQVHILKYRF GVMLKKLEVISDNEPRYVIASAERKLMGEWVDYHISILNLIKYVNSTYSKVIFVQYTASSLILCTVAYVL

SHMDALSMNFAGNFFYFIAMNFQIFFQCFCANQVTLEFLDITTALYDENWFNLSNNVRRSMTIILCEPFR

PVLFTSSFFIVLSLESFTKVIKCAYTVYNVLQ

>MmedOR35

MAILKESFCVLTGIGLWRPVEWQGIKGAFYNCYTLLVLLNSITFIISESMELIFFNDGIFDFFNNSSMLI

TVIGMCGKLITVVTNRETIIKMIERFHRSPFSPRDYEEEIIHKNFNQKIRFNTLAYIVFFEASVTVYTVG

KIFEDRPPGVLPCRAWLPYDYSNNIIIYWMTASQQLLTVVMTANVDIAYDTLFPGMMMQVCIQINVLKHR

FRLTLDALENISDDKMDPVMVKTVEKKFFSEMVDTISHVFGPMIFIQYSFSSVVLCSSVYALSQMVPFSP

EFCACSVYILCMFFQILYICLSGNRVTLEFAKLGTAMYDTYWFALSNNAQKHIIMMMMSSVKPIIFASGH

VVTLSLESFKRLLKLSYTIYNVFQQSS

>MmedOR34

MEDLTQEQKDLNEGAKMFDWGKWISKGIGVWPLAPNDYLFTTTFLYFTAVMTLEWVDLYTCLGDFEKVVD

NLTENLAFVHIYVRTLMLRVHIDKLRDVMTESLKDYRTSAFKNSTEIKLFMTHINKGKVFAKVVITFIAM

TEVTWYLQPLTTPSPPVDNRDNETISILLPYHFYVFYEINDFKTYVLTYLSHGPHVVISGFGHATSDCFL

IILVFHLSGRLAVLAERINALKNKPEMNGIQIKSIIAEHIRLLKMGENIRSAFATALLAYLFNGTILLCM

IGYQILVNFMTGPNSDLMQYFIFILATYFIITVFCIVSERLIFESTKVCEAYWNCGWYNMPREHINDIMY

CIVRSQKPLALQAGKFAYFGNSTLTDVTRTAMGYLSVLRNFLIVN

>MmedOR33

MQVLTFNFFLLSIMGVWKPRGWHGIKAALYYIYQTITIILNHLCLLSLLLDLQFKNIELGDLIDNLALVF

TIIIIRQKIVCIIGNRPGITHILDSLKNSPFKLEDSKEEFIFSRFEKLARNIITYYPLIYLSTLSVHSTG

FISVMDPPYTLPYKGWFPYNYTRTTKTYWVTAVYQIYIVLTMGSINAISDILLPCIICYMCGHIHILRYR

FQVMAEKLRIMSKNNEPKDKIISTERKLMGDWVKYHIDILNLVKFTNEIFSSVIFIQYTVSSLLLCTIAY

LLSHMEPTTMRFAGNSAFLTAMFFEILLPCYCADKLTFEFLDISTGIYDTNWYHLSNNIRKSIVIILRKS

YRPVTMTSGFFIVLSLESFTKVIKLAYTIYNVLE

>MmedOR32

METTATKNDNTNQNKNELQLTKTNKYENVDYKSDADYAVVVARTLLTPLGIYPLHGSDTSLSKFLIAIQI

IIVFGLMLFLLVPHFIWTFFDAEDLKKLMKIIAAQIFNSLALIKFWTMIIHKKELRNCLIQLENNWKNVL

CEEDRVIMIKNAKIGRFFTIAYLSLSYGGALPYHILLPLTAERIVKEDNSTQIPLPYPTDYVFFVPEDSP

GYEMLFVTHIIISTMILSTNCGIYSLIATYIMHACCLFEVVCRHLDEFSKNNTNNFKTELTWIVENHNRA

IQFAETLESSLNIVFLCEMVGCTVIICFLEYGVIVDWEDGKLLGLVTYVILMTSIFVNCFIISFAGERLK

EQSIKIGESAYFAEWYLLPKGLVYDFMLIMIRSSKPASLSTGKVSDLSLAGFAGLVKTSAAYLNFIRAVV

>MmedOR31

MLFKATPEFAIAFTKLTSILGSSWPHYKNATKCQLIVFNIKWWFFWFMSITAFLPMCYAAYNNTKNILSF

TKSLCDAANCSQAFIKMLLCKIHYRKLQFLFYEMEKYVEQARANERELFISYIKRCGRLHVSIMISAVMA

AVIIIIAPIGMPQPFPNVAEYPFPVDGHPTFEIIYLQQSIATIHCMSIPVFDCQIALLLWYAGARLELLG

DEFRKVTDNQQFVACVKKHQYLLWFIQEIIMSSRHILATTVVMCTIAVITSGVHIVGKEPLADKVTSVIL

STGLSAVLYLCAWPAEHLAQMCENVGAALYCSTWIKNSKESNKNIFIVIQRSQKPETIQVPGILPILSLT

YYATFLSKTFSYFTTLRVVLDKMED

>MmedOR30

MLFKATPEFALKFTKLIALLGTSWPNYEGTPKWKLVVFQIRWWSTFFLAITACLTMCYAACNQYQNILNL

TKSLFDISNTSQTFVKMFFCKVHYKRMQYLLCDMEKYVTKAKPHERDLFIKYIKRCGKLHLTVMGSGLLI

IHIIILAPIALPQPFPNIAEYPFPIDGHPTYELLYLHQSCATIHCLSIPAFDCQIAMLLWYAGARLELLS

EECKTITDNKQFVECIKQHQYLLWYIQEITTSSRHILATTGCTCILTAISSGVHIVSNEPVAFKVPFMIS

WVIVSSTLYITSWPAENVLQMCEQVGMALYESPWVQNSKELNSSILFVVQRSQKPSTIEVPGILPVLSLR

YFAMFLSRTFSYFTTLRVLLDKINLDMEIPAED

>MmedOR29

MYHKLLNKLVRILRYNGIWPVESTVRSYKLLNLIFRLFNLSIIVIMMLLTIADAIANFNDISLITDNLCF

FVGCSEALTKGIKYCIEYKNIVKLMNDIYGPIDIINKKNNTEVMKGINEIARFENRQFKIIFGIVSLLIV

ARVLGADFKNKGFPIRALFPFDATATPYYHLIYLLISYGVLLVDYTLLGVDLMVVVIMRYLTIQVDILRA

NCRHCDIESTRRNIVINGYDDKNNENTDIRNFVGFEIEHEDSDGKDSFDDRLKRCIIHHQKVIYMLNGLN

DCFSFCVVVQILGTTVLLCLNGFQIIMGRDIHLFMRRVLASTAALLQLLLWCWYGNKLSAAADSLTINLW MCGWEDNYKHGLRNFISIPMTLSLQTLELRAIGVVPLSLQTFVSAIKTSYSVLVLLLTVAKDE

>MmedOR28

MTRSLKLQDQETFDQVAKVLKWNKWLLSTLGLWPQSPNTFIFTVNFSYFVYHMAMEYLDLFLFIDNLEHV

IENLTENMAFTQILVRIAMLKKYNRQLGEVVNEAFKDYDARIYRTDEERQVFIDYMKKAKLFIKLLCAFV

TMTATSYYAKPITSPPPPPEGELDVEMENATMSFILPYRFHLFYQVNDSRTWALTYLSHFPFVFVSGFGQ

TAADCLMVTLVFHVSGKLASLAIRISEINTEPGVCKQELRSIIIEHDRLLKMGQSIEEAFSETLLAHLIG

ATSLVCILGYQLLVNYARGQGADLVTFFVFIFLVFLVLYAHCVVGESLITESFKVCEAYYDCLWYKMPKE

SSKTIVLCMARSQKPLGLTAGKFGAFCLSTLTDVVKTAMAYLSVLRTFLVIE

>MmedOR27

MKFFEQSYFTLPRNFARSIGRWPYQSSLQSFLIGIVIISAFILQVGPKILADIVHSDDQELILETLAPTI

TNVMAFAKYINTFVNARMLKILFERIKDDWESVTDKKEKIILESYAGFGKLMATGYAGFVYAATVQFITE

PVLPIILNNILRTNLSAPHKFADPMEWIIIDKEKYYWILLSNSSVCIMVILTVLISYDVIFITFVYHACG

LFAITGHRIENLPHDENFKIINRNTNSLKNSRDVHYKHLVSCIRIHRMALKYVDLIESTFAGCFGVVVGL

NLPLMSITGVQGMKFFRLLHNRMTLQQKIKYVMFTGAQMLHLFFECFLSQQLTDMSLRVQQHIANGNWYD

ISTKSQKLLILMTMRSQVPCILTAGKIMELSVESFGMMMKTSGSYFTVLLSMQ

>MmedOR26

MDIFDAPYYRIMKNSAKLIGQWPYQSREKRIIIIIIVWAFFFMQFVPQIIAIVVHIDDPDILFEACSNMA

VDFVTAIKYINTICKTNLIKKLHDRVIIDWSLMLNDEEKSTLEKHTNLGYLFSSGWAGFAYMSATIFVLE

PVFPRILNVFISVNATDPFKLALPLEYIIIDREKHYWIMLFVSTVFVYNIIIVLVSCDIMYITFVQHVCG

LFAVVGCRLVNTPINENYSERHKAGDYLSNSKDIPYKHLVSCIRSHRRALEFAELLEDAYCISFGLTVGL

NLPVISVTGFQIITQFNTIQQLLKYASFTITEILHLFFECFMSQRLTDMSLEMQKSIAEVQWFDNSIKSR

KLLIIMTMRCQVPCKLTAAKIMDLTIENFGMMVKTSGSYFTMLLSMQ

>MmedOR25

MIFKATPEFAIAFTKFSTLVGTCWPNYKNAPKWKFVLFQIRWWLTFCLSVSAFLPMCYAAYNHWRNILSF

TKSLFDAANTSQTFIKMILSKIHYKRLQYLLYEMENYVTNAREDERELFIVYIKRCGKLHLFVMIFGFMA ILIIIVAPIGLPQPFPNIADYPFPVDESPAFELVYAHQSAATLHCLSIPVFDMQIALLLWYSGARLELLA

REFKTVTDNKHFVECVKKHQYLLWYIQEIIISSRYILATTSVTCVIAVITSGVHIAGNEPVGFKIPFAGA

SSIIAIILYISAWPSEHLIHMCEGVGTALYESEWVQNSKALNNSMLIVMHRAQKPSTIEVIGVMPILSLP

YYATFLSKTFSYFTTLRVLLSKVEMD

>MmedOR24

MELDNIKLRHLEPYYNIKVSLTLTKYIGTWPPVLEPYRSIYLLYTCVSFIFILGIYLTVQTVNLFVIWGN

IELMIATGFLLMTNSIHAYKVFVILGNQKRIQVLLDKLSTTNYYHNDDKYERVFTYYAWQGLYHHIAYQS

FGTVAVLCWGLTPLADAVAGNTRRLPMEAWYPYNTKKNPAFEITSGHQAVAVLIACVHNIGMDTLVTGLI

NAACCQLEIIKQNLKNVDLDFEYQIDKCDYEDFMNKQINKIIKHSNEIYK

>MmedOR23

MFKINPEFAIAYTKLTVTLVCSWPPGRNSSRLDFLLFRIKWWISWLMGIFLVIPLIYAAYIDRRNVLEFT

KSLCLAVSCGQCAVKMFFCKLQHHRIKFLLDEMEEYVKVAEPFEREIFLGYIKNCGLVHVTLNVCSLVAS

VGVILGPLVLPQSLPTEAKYPFSVENHPNYEIIYIHQAFAGILCSSIGSIDCQIAMLLWFSIARLELLSL

EMKNITNVYQFHNCVRKHQFLLWFVDEVIKAGRNLVATTVIMTTFAVILGGVHIVGNEPMLVKLQFVIIV

GGFSMLLYVTAWPSEILTRMCQNIGWTIYNSEWIRNSKELNKGIEFVIQRSNKPAVIYISGIFPAISLNY

YATFLSKTFSYFTTFRIILAKLE

>MmedOR22

MDNSLDSFLRINRLFLSSLGQWPQQEQISKIFTLINAVFFLITQAYFQTGGMIAAKCDQPIFMESIAPVL

ISFMCLVKFVNFNYNADKMRKLLEIIQADWNSINDLEELKILNSWAKDSRKNTIMYAGALYGTMAPFMLG

PLVPIFCKLMPAGVLPANSSIVLEKPVLFHVEYFYDLEKYYYPLLIHSYFGTMAYMTVAVAIDSMFMVYV

QHACAIFAVIGNRLEHLADDSSINFYYNPHILNDEPYKRMIECIVQHSKALQYAQMIQSANSLSFFFNWD

SICSLLLSVDFNWPSQRLADESARISETTTRCAWYLTSMRSRKLLQLFIMRSSVPCQLTAGSFYTLNMQN

FSAVVRTSMSYFTVLTSVQ

>MmedOR21

MDYLSSPYCRLNKILLSCLGEWPYQTSTQRRFIRSTIYFFSASIIIPKIIKLIKVWGNLDMIIECIPMLL LDAVNFVKVVNGFINFRKMRELFDRIQDDWGLNYSKREFEIMQNYAEDGKKLSQFYASYMYATMLIYFCM

PIIPKVLDIVLPLNTTRPELYLFEAEYFVDQHKFYYPILIHAYITCAVAVSMLVAFDTEYAIQALHGSGI

FSALRYKLENLVIKDDEADYKNDEKIKQSTYNMVVQCAVLHKRALDYADLLESSRVTCFFFVLLVNIAAI

SITGVQTVMKLDQPTEAIRFGVYTLAQITHIFYNSYPAQMLFDNSWKTSDAIFAGNWYRAGSKSKNLLHM

MIMRSRIPCKLTAGKIYLMSLENFTGVVKTSMSYFTVLLSFR

>MmedOR20

MENTSIESRQSVLSMAIAGLRLCGIWSLDSSSPIFLKLLHNISNIFGIITLIIFVGTLTIDLLLNSNDLL

IATDDGCYLAGISVIVFKVYQFHRHHKRIKNLTDATYQPIYVFWKSTDIGVKTVLRTNKFYEDLGFTFFV

SLGGFLVIALIFFVPTEEGALPIRGAYPFNTTISPMHEVAFCLQIYAVTYGLMVIVLMDGMGLGIMRWLN

VQCIILASNYRNCRTNQNNSFYLESRDDLSKIASIEDDNNNVTDIYDEPDSNITTFCPFDEQDHAGMSDC

FIGRFKKCIKNHQRLLNTIDELNACFSSCMLMQLFASFSMICLTGFQAVLGATTKTSLIKFVLYLGAAFS

QLLYWCWFGNELLYEVFILPHD

>MmedOR19

MDVFEEPFYKMIKNFSHLIGQWPYQSSRKKFTIVTLIWIAFFMQFIPQIIAIVIHFDDRDVLFEAFSSMV

IDFAFIIKYLNAIYRAGLMKELWESIRRDWTLLLNDVEKRTLQHHANLGNFFSMGYAGLAYMSTTIFVTE

PIFPRIVNIFVETNETIPLKLALPLEYIIIDIDKHYWLILTITNIFVFNIIIVIISCDIVLITFVQHVCG

LFAVVGCRLESTPFDENYLEGQKGEDFLSNSNDIPYKHLVSCIKGHKRALEYAERLERAYTLSNGIVSGL

NAPVMSITGFLMITESSTIEQLLKYATFAISQMSHLFFLCFMSQRLADMSLRIQENIGNATWYNNSLKSQ

KLLVLMLMRSQVPCKLTAAKLMDLFIENFAVVVKTFASYITMLLSM

>MmedOR18

MYSILPGSFVVLQAIGLWKPPEYNNSPILNYYYRLRTFITFFLIYSFTITGITGLILTTKDIADVTSDCF

ILLSIFAICGKIANIIWSRNEIIWIIDTLNSEPCKPLNNDEIIIQQKVDRLIWHSTLFYGILTEITVFMV

TFGTLLLQLPIGTLPYNTYLPWDYSHGYLYWVAYGYQIISVCLSANSDIGFDTLVPGLMLQITAKLEILK

YRFINLVDTLKLTQWNGVNDKSYHNFRIENKLIADYVKCHLIILKLADTINKTFDKVILLQFFISSIVLC

ISVYNLAFLDVFTTEFTSIILYLCCMLMEIFILCAAGNQVTIVSSTLSDAIYHTDWINLDTSAVKSLMII

MNRGLKPIIFSSGHIIKISYDSFKTPIKLSYSSYNVLQRT

>MmedOR17

MENIPIDIHRKFLNINITILRYSGVWPLLPTAKIGWKVFNFIYRIFNLTVFIFYLITLGADAVTNYKDLT

IFGSDGCYFFGTCMCVFKACKFWASYHKIIKLIVDVYDPIDVLVRSADPGILMNIKKSYYQESIAFWGFS

TLCSFFHFSVIFLIPREKGILPIRAIYPFDTKISPNYELAIIYQAYCLAYALCVTIALDITTIGFIRWST

LQIAALTSNYKNSNPNVTKRASLVTSSSDARKIIEKLNKIKITDDDVEIETFLPLDYHETKYFINDLFLS

RFTTCIKNHQRLIKIIRDLNAVLSPLMLVQFATSTCIICLNGYQMILAETMTYNQWMSGWECAYGKVKSNELRNLVTIAMMPAIKPFAFNAVGLFALSMPTLLAVVKSS

YFMLILLTTVTED

>MmedOR16

MKLPAHTKGYKVTPEGAVNFIRVTVYLTCISFPLTEKTKVRINYEIILWLSIFLSISLFAPLLASIIKYS

DDTFIVMKSFILMSAISNYVIKVIIVRIYHKELQQLGSALDEFIKKANESEKVILQRYVDNTWKFHGFMTCSYYLTATAVLLGPLILPQKFPTDAVYPFPVDNQIISYIVYL

HQCIVGYQCSAGMALDCQAALFLWYLSARFEILISEAKNVETFDELRNYIKKHQIILLYAKELIRPTRLIAFVTVVMTKIGMIFGGIVLISDEPVVIK

IQFAILVISTTINIYVCAWAADNLITVSSTAMSNAIFEISWMHAPKLRNFLQTVIHRTQKPVVIKIPGLL

ETLSNEYYAQFLSAAFSCFAAARVVVSS

>MmedOR15

MEAFRLHLFFLSILGVWKPQGWHGIKAFLYSIYGSTVVIFNHIFILSGILNLTKFKHVSLDVFIDNFSQMLALIVVRQRIICVIENRNSISQIIESTDKYPFKLRDRQEKLIFS

KFSKLAKNILIYYPIVHMCIILVHTV

GHISVMDPPYALPFQGWFPYNYTRKTKIYWATATYQLYAIFSEGSIDLILDLLLPCILCYMCGHIHILRH

RFGVMTEKLQIMSENNEPREKIDSAERKMTAEWVEYHIDILRLVELVKKIFERMIFVQYTVSSLLLCTLAYLLSHTKCTTMTFAANFSFFMAMFIQILLPCYCADKLTFEF

LDISTGIYNSNWYQLSNNIRRSVVVILRNTYQPVTITSGFFIILSLESFTKIIKLAYTIYNLLE

>MmedOR14

MEKKTINDHTSIKLMRLCMNGIGMWSIEKRRDEIISNIVICYTIATLTVGLIVETTDIYYCLGDLREMSY

VAPCLLNVIVELFLMGTFVINRSEVIAFSDYTTREFWSIPYIESERKLLDDCNRKSVKIIIAFIVVIQLV

VWQYITIPIIESYGKNASERTLPYNLWFTFIPFKETPYYEICFFLQSAATLTTGVCATAFATFLFTINLY

ATGQFKILQQRLESSCQVYNIEKIKSVEQINLIAEESYANLRKCVELHNVLLKYITRLENLYCQIMLVET

LACVFLICTTGFQIVLGVDSSILRTSRSALYFCCLVTQLLLYSWSCHEIIIESLEVAEAAYRAYWYSLSW

SKYGKSFRQALLIIITRSRRPCVLTVGKFVPMSLETFTAVFNSALSYFTILRQMTEEMENS

>MmedOR13

MEEERSRDERDLESSVRAFYWGKWMSKWIGVWPLAPNFYLFNVTFAYFTAVMLLEYVDLFFCLPNFEKVLDNLTENLSFTIIYVRTLMLRVHNYKLGTAIRECLKDSS

VSAFRNSKEIDIFVQYTKEGKFFAKFVIAFAAMTETSWYLRPITSHTAIRVIADNETLNNVTLKFSLPFHFYVFYEINSIKTYALTYLSHGPFVPINGFGTASANCFLIALSF

HISGRLAVLAERIKTLKDNPDSYKRELKLIIDEHIRLLRMGEDVKISYGVNLLVYLLNGTILLCIIGYQILLTLTVGPRTNIMPFIVYIMTMYMVISIFCILSENLIAESNKVC

EAFWACGWYDMPPDCISDVYYCIARSQKPLALTAGKFLTFGYGTITDVTRTAVGYLSVLRNFLLLEE

>MmedOR12

MIKRPIETHRKYLDKCIHCIRFCGIWKFDSSASTYHKLMNLFGKIFNPTLLIFHFLTLFADIVANYNDLI

IIADDGCFLAGSFTVCFKAYEFHLLNNIYMKIINDVHDSVDVLQKSCDLGVLTIIKQYIFFETLDFFLLI

YVVTVLGVGLIVLLPLTRGGLPVRAIFPFDVTKPLMHKIAFFIQAYNISFGLVTIVALEYLSWGLMRWTIVQLKVLSSNYRNCNSDKVPIASFNVTKNTYNKIKNFNILK

VDDEDIEIHNFIVFEEKELNSINDCFNWRFRTCIRHHQRLIKIIYDLNDIFTVSLLIQLGVSTFLMCLNGYLAFMFPHDNQRLIRSVLYLVAGFVQLLYWCGFGNELKFQ

ANDLTTSQWMSGWEDKFDGGIKNLVTTSMIRTMQPLEVRAGGLFILSMETFLSILKTSYSVFVLLTTVSDEE

>MmedOR11

MQNEKEELPSCEKLFSLELAALKFVGLSSLRNGFRKENMNIPVKFYEIFLFICAASILSGFFISSALTVH

MLLQSDFILACEIATFIFAGAVTVSKVLRIWSYRIELIEILRELNELWEKIVKHRLNLKENILNMLNESR

PIRYGYCFIASSLNLSYALRPYFHMLVYFVKQSENKTIDLTVTTYPLLYPIERGTWLGYLLCVTYEQSIL

YFGGIYWIMCDTLFILLTSHICVHFMIISNDFNNLHINYDKNNNESFQLIEDLSRRHQKMFVLCQRIETLFSPIILLTVVFNGIDLCLCIFALDKDLSDGNWAKVASSVTH

ALTLFFQIVIYCEFSHVATEETSKVGEAIYNSSWIYFDKKMKKMLLIIMMRASKEYKFSVFGILILDREQLTQIVKTTMSYFTMLRSFS

>MmedOR9

MYSSNSTQVIADFFKQPCYRVNVLTLRICGLWPYQSKFEGKLLRFLWAFFVSSQMIPQVCVCITDFGMDTLTSTIPPFTVAIIAGAKMIISTLKVNQIIELLVTIQKDWSKL

KSETECDIMKKHLDQGKKLTLFISAWYYNSMVVFLLLPMRPKVMTWLGLSKGPADFDFPYPVNYGVDHDKYFYAIETHISFCSTLVITTIIAADTLFIVFVQHICGVFKII

SYRLENLVSSSSLDIDLHPNKINDRAFWVISDCIKKHNKAIQFAELLENSYCWIFFISVGFETLLMTFSGVQLVSQMGNIDGLFRYGPFAFGQLVHVFIENAISQQLINYS

GEINDAISMIKWYTLSMRSRKLLTFMIMRSQVICSVSAGKMFIMSMETFGMILKTTMSYFTILSSMQDD

>MmedOR10

MSTENTQLDADIEYNLKLTKWILKPLGVWSIVTKDYRFISKLSSVFIIILNSFIMFITFMPCCVHMIYRE

TDPAVKIILMGPFGFCLTNCCKYYFIIFRSNIITHCLENLKSDWARPKTKQDRLEMIKNVNIGHNITKLCAIFMFSGGVSYHTIMPIWSGSTVNEANETIRPLVYPGNEIFV

NCQETPIYEFIFILHLTCGMVMQTITTAACHLAAVFASHVCGQVDILKSQLQNLVDKESLKIDGTIENRIASIIQSHVRILDFSTNIEKMLREICLVEVGASTLIICLLEYYC

MTEWSNSETINILTYLMLLVALSFNIFIFCYIGELLKKQCNSIGESTYMINWYKI

PRNKGKQLMLIIASSNNQRKLTAGGMMELSLRSFGNIIKTSVAYLNMLRTVTE

>MmedOR8

MDVLQENFSVLFYLGVWKPLDCTGIKSFLYNLYTLFITSISYTFLLSQILDLIISTKTVSDFTNNIFIVS

AILTGCLKIFRFIRSRNTFINIINNFKRGLFKPANNDEIIIWNKYARITRLVTIGATTSLIIGLIVMSYA

LCSFNIPQRQLLYRAWLPYNYSSLPIIYWLSSMEQLATVHILAGINFSFDLIFFGTMLNICAQINILKLR

YKVALSHIYSINDSINNNDLGELRDVSKLIREYTDSHDSIIKLFNSAHHLFSTIVTIQYCTSSVAICTSA

FNVTKMKFFSFQFFSTALYINNVMIELFILCVSCNEVTLEFADLGNTFYDCQWYAINNANKKSVAIMMTNTIKPIYFTCGYVIHLSLDSFTSVLKLSYSIYNVLQSAD

>MmedOR7

MDIYDKPYYKITKISASLIGRWPYQSSRQSLVIVTVIWSAFILQAIPQIIAIVTHFDDREVLLEALAPFI

IDIMFVAKYMNSIYNAELMVTLFERMKKDWKLLSSAKEKRILEYHANIGRLISTGYAGFAYTTTAIFLSEPILPRIINYFSKSNESVPLKFALPLEYIIFEKENHYWLMLAIT

NMFAINMIIVTISCDIMFITFVQHVCG

LFAVVGFRIENSPTGKITDSNHRAVSLRKNSQDFSYKHLVSCIRSHRRALEFVKLLEETFTGTFGVVVALNLPMISITGLQLITQSNTVEQTLKYLMFALAQVLHLFFDCF

LSQNLTNMSSRIPQCIANMKWYNISKNSQKLTLLMTMRSQTPCKLTAGKIMELSIENFGMMMKTSGSYFTMLLSMQ

>MmedOR6

MTLIESCWMVFTWLGLFRPIKWKGLKARIYDLYTAIVLFFNYSFFICGVMDIDFTHLNFFADIDLITLMLQYIENTPKILCMILNRNALIEIDFKLQHDHFKIKDEDEKKI

QNKFDKFSRYVLLAYSALQATSLVYYTTGRILAMESPVILPYRSRIPFNYSSSGKIYMLTALDQLYSVSSLICINGAFNLVFTSTMYQICTKIRILKHR

FKVIIQQLEHDGELGNNDNKNLRDVMRKNDATTDKFESQLIANWVESHIALINLYDYAKSVFAKAVFIHYVINSIVMCTLAYILSHCEIDNIFFGNVCYFSVKCTQQFL

QCSSAHQITLEFEDLRDMIFSTNWFATKITIQKSIIIIMFKSIVPIEFVSGYFVTLSLDSFKRILKLSYTIYNVLEG

>MmedOR5

MDFWGNSDWRFLRFQLCTLGVWPFQKSNFKRVVGFFVILSVQSITLPEVIKFTYIWHDMEEFADCFPLIGIHFVCTIKWMCCVVNMDKIIALLNMIKSDNLSKELTEEE

HQILRDTGKINRLFVLVYSIWIYVIAILFLVFLPLIPVTLDIILPLNESRPKIELYHTDYLFGPVKYSWVISLHQCIISPFPTIIIIATGSLYCNCCQHAC

GMFEVIGYRLKNLDITIEAAMNKKNLGYYADTEIFYKSLVTCEQMHQRMLGYVEKFQDIYSLTLCFSMTTSIITLCITGLEAIIKKDQFFEVIRYVTCGLAEIADVFILCW

YGQKLIDSSDYLYLCACQGNWYKYSAKSQ

KMFISMIVRFSTPCSITLGKLYRVSLECFSTIMKTTMSYFTVINSLREEE

>MmedOR4

MDFFDSHYYKGMKILLCLIGRWPYQTLKERVLITIILSILWSYTMFHRMLVYSNYDNYSSKHEVILETIS

PLIVDTITFAKYITTICKMDTIINLLESIKQDWKIYTNKEEKKILEYYANLGKILSLGYVGAVYMVTVLF

MTEPIVEQTFFKLFQNETIPKRFSIPIYWKTPDIEKYYYYLISFQTLNTNFIISITCASDAMFINLLQHV

TGLFSVTGYLLENVPIEENSEENGQKKIKDVAYEHYVRCMRSHKRALEFAENLESIYVWCFGIVITLNMPVMSVTAMQLTTGTSNVIQSMKYGTFAGVQLLHLFFYCF

MSQKLLTSSSVIPECAMNGKWYLCSVKAQRLVTLVIMRSQISCQLTAGKILVLSMETFTSIVKTSGSYFTMLVQMRNV

>MmedOR3

MDIYERPYYKISKNFASFIGQWPYQSRLHSFMCGSVLWTLFIIQVIPQIIAAVVNSDDQELLLESVSPFI

TDGIYIAKYVNTIRKAKMIRRLFEKVREDWKVPKNNDEKLVLESYLKMGRFLSIGYAAFVNMGVIIYIMDPVLSAIVNIISKSNDSMPLKFSVPMRFIMFDEEKYYWLLL

ILSNTCVIFIINVIICCDVIFITVVQHVCGIFAVVGFRLEHSPSDTVSPDLIEGTRFSMNSQDISYKHFVSCIRDHRRALEFSELIESTFAISFGISVGL

NLPLMSITGVQLLTQSESMRATLKYIMFTGGQILHLFFDCYMSQKLTDMSSRIQHSVARANWYENSVKSRKLLILMTLRSQVPCKLTAGKIMELSIENFGMMMKTAGS

YFTVFLSMR

>MmedOR1

MVTVYEYEEMMKPIKMVNRLISIWPLEENDNSILSRLRIFHRISMFILILIQTVAVTADIVHHWGSMKEVTECALIATAFYLCVLRLTVYTIHDKDLQTSVQIMKNDWIK

FSGEDELTLKEKCLPIIKLAKFFIMTVFSTIGLFMVAPILEVKILGMEEKKLPFRGYFFENQTITPAYGGLYLLGVTAGGFGGSMIAGATTLNLILVMHGAAKFMVVRKNI

ESLKSNSENSITFIDCVRGHQDAILFAERVENTINVLVLGQFVISTGLVCFAGFQITEMAEDRGQLMKYTSFLNSAIFELFLFSYSGNELLTESDAISQSCYASNWVGTSFA

KSMQIVMTRSLSPCKITAVKFYDMSLANFSSIFSFSFSYLTVLRTMEAE

>MmedORCO

MMKTKHQGLVADLMPNIRLMQISGHFMFNYYGEGKKLMHKIYCSVHLFLILLQFGFVAINLVKEKEDVDDLTANTITILFFLHTLIKIVYFAARSKLFYRTLAIWNNPN

SHPLFAESNARYHSIALTKVRRLLFCVGAATVATTISWTTLTFFEDPHVERLNKETNETYIEEIPRLLVRSWYPFDARHGVAHIGMLIYQIYWLFICTVDANSIDVLFCSW

LLFACEQLQHLKAIMKPLMELSATLDTVVPNSGELFKAGSADHLRDNDGVPAEPAMNGDN MLDMDLRGIYSNRQDFTATFRPTAGTQYNGGVGPNQLTKKQEMLVRSAIKYWVERHKHIVRLVTAIGDAYGVALLFHMLITTITLTLLAYQATKVNGVNVYAASTIG

YLLYSLGQVFLFCIFGNRLIEESSSVMEAAYSC

HWYDGSEEAKTFVQIVCQQCQKAMSISGAKFFTVSLDLFASVLGAVVTYFMVLVQLK

>RcyaOrco

TERRNIFTHFSSVQFHLVLILTQFAMCGINLLQESADVDDLTANTITMLFFAHPLIKLIY

FAVRSKIFYRTLGIWNNPNSHPLFAESNARYHALAITKMRRLLMAVGSASILSV

>RcyaOR1

AFLFFCSLTIFLQLSFPLVVGNGFEDRGLPYQTWQPYSIEPILPYVLTYVQVASGAVVTM

ILCVTMDNLISGFMIIGCGHLEILKYRLVHLETPADIKICVQHHNVIFQ*

>RcyaOR2

MLDHIRHTRESHVGSIKSIFFLVCMMFQLLLYCWYGNEVFLKSQEAIRAAMDNTNWFARP

PEIRKALLVIMIRSQYPVQMKGGLLLTLSLETYTMIVTASYK

>RcyaOR3

SKRSWTDLIWFRFLNFIRGEIRDRTMKPFEPNFHLEVSLGLIKYMGTWPTDGKYRVLYLI

YGSISFSIILGIYLMVQSVNLFMVWGDLEKMVAGASLLMTNISHALKVRETYSTQIDRF*

>RcyaOR4

FVRRHQIIIDFCTKLEETICYVSLAQVLTGMYTMAILMARLNMKSGSSSWYTAILRAVAS

LFLSCWPADNLYSESIGVAQAVYDTPWYLGSSREKIAV

>RcyaOR5

STYEQGFKKCIKGAYFLCVRGDAPFRICSRQLFLYSVRIIDQRNIREYKTGRLVRATRKK

NIYSLQTTQSTMETYSLYRTCNFLNFLSGNCFPLKLKNDHYSTEKKLYVAFAWIMATTFG

MTSVVAIFFISHEAALQRSALGMAVILEGSIIGIYIHIRSPLVRILFEKMRVILIDNDSL

NEEFRHTLNPIDKPVKICTLCCCLMSFAWNTLPFLKLLNQDRFTYTDFSLPAYFPFEPFD

KRSFVIAATIHTVSGFYPTVRKSSIDALVICIVASLTAHYRYLKNDLAKILDGDKIGTE*

>RcyaOR6

MEAFHVNWFLRSKTTKNSYSIIKLTDKFESRLSAFGMVNLSLETFTEIMQHAYSACLILQ

NVG*

>RcyaOR7

LMYVNRNFFYTDPRHRHLLTKIPRYLQLIMIRSQKPPVITAGNFYVLSLENYKNILSTSY

SYYTILRALAAKNKT*

>RcyaOR8

MANKIDSSFTIVLMGQLLGSGTLISLNGFNVLVNSENTQTTSLLAFAFYEASMLTFLYSY

CFVGECLIQESRRVL

>RcyaOR9

GCQCVARSQPIPKLRG-TCSRNSD-TVDYCQCR-AKFLSHPTYVYSRSANSTLRQFHLPT

MVQLYK-NNSGD-GFMRCASSSPGNGCVNDSPLFSSPTNN-NLLKNFFSQLPSTELISLY

AYAQAIGSSSALYRTVLQVIEPLRDIIVYFFSG-SPELCMVTPLITERVKIF-SVKMRFL

DVRAKISMIKFKRPKMEKNKIGTIITSTTALRWRLLSQR

>RcyaOR10

MIEESMNNLRSVIYIYYAYFAYTYEICDFSKLTIRTNMYVCIFVPIFSTQVPIMSFPFFS

MVSLMTAMMYQLFIFCNCGDEVNIFFLYFQYVINKSFQSFLVADAAYFSEWHNSASSMEI

KRALLLIINRSRRPLKLTVAKFAILSRETYLRVS*

>RcyaOR11

MSAFRPTRVGPGFGMSGLIQMGTEVSPMTFIDRIGQTEKKLPPQMRAAFNAFKKNDNELE

DIVYENMKPVVMIVRAMGVFPVTRPQTGSSNNFSHVPKYRNLSAKSRSQGTNKTFRYYKI

QTRFEPHDLLDAALRRSDYSRALRHVAQNKRGAGFAG*

>RcyaOR12

SRRVLDAFYQCRWYEMSSSRSKDFIICMIRSQRPLSLTAAKFYIFSLENFTQVRHDL*

>RcyaOR13

NFILVFRIIPLTLCTNLLSIFRYHRIEKNKKLCAIKMSQSTLVIRNNENFFRFAKVLNVV

VRQHRIKKLLEMTKSGELSVHNSEYENLLRSYSRRGIFHHLVYQSFGAIAVFCWGFKPIA

DLIAGRSRRLPNEGWYPYNATSTP

>RcyaOR14

MWYLGTTFLVVVDYVLTPLLRSGPELPLAAWYPFDYESSTFAYLVVYLQQLTAIVLAYIC

CIVEIVFGILVLSCCTRCKLAQDRFENLESEESYKFQGERRIKSFDEKISKLVKSHNKIF

E*

>RcyaOR15

LWDSVGPEDRALFRPWVTQARIFSTIFFCAGQSSAAMLTLFTVIKQRAVPENSTVQHYLG

GSEEKAFPSPTHELLYSLEIVSMQFGVLYITAADMTGTVLVLNMCGQLDVVKNWLRRIEK

PALNATGENIDKRLEVVLRKFVR

>RcyaOR16

RVPFKVKARFCSFVVSAGLELFVYCWPAQFLLENSGDIRLAVYSSNWIGQTSRTKKLILI

MMQRAGKLTTIAIDNSLLPLSLSFYASFLSTSFSYFTTLRATATTSASYELHNI*

>RcyaOR17

MASRADTFVSIKLTRFYMKVIGFWPAANKREQYIYAVTLIYTIAAVIFAIAVEGVDLYHC

WGDFDALTHNFCITTPLVVIIIKTTLCLIRRDAVLELISFATENFWNATYDEFGDDILTE

CNKRGILLVCTLSFAVQGTVSTYVIKPMFVNVGKNETDRVLPFKLWVDLPVTTTPFYEII

FTIQTLSTIHSAICFFCFDNLMGILNIHIVGQFKILQQRITNLCEDYINSMNVDEQFAAN

LEACSKDYETIYSDSLPDTKQYKLETQFFDLDVKTFGELKKCIKQHQFAVSSILMCLGGF

KVFVDKEGIYTLHLTSVVVQILLYTWTGNEIIVNSVEIAAAAYRCRWYMMPYSKAGRSIR

DALTLMAMRSQRACFVSAGHFTAVSLEAFTSILGTTSSYLSVMRQMSETLK*

>RcyaOR18

RVVDNLSETIIYSILLTKIAVFRKNHSLSEIIDAMNEDYENHKYKSLAERRIYASYNKMS

ITLSKILIPMVFATAFLYYVRPIAEYVFTMTDHNSTAKSLDLPYRTLFHDEITNIYIYIL

GYIYQAGTLHIVTLALIGSDGLLVSLTLHVCVL

>RcyaOR19

MDILKFNFTVFNYCGLWWPEETRSSKKRLYTIETLIFLTMIYAFTLMQLFDVVLGDYNID

EITYNFFTLFTMISHCFKVTNFVIRRKTIVVLLDALRKNICRPQNIAEATIQKRFDGVAR

SNTVLLVSIAEVTAVGFLVIPILTQGYKDRILPFKVWLPYSLTSRLAYWTTYVYQCITIL

AAVIVNVVTDTLVSGLIVKACAQLEILKDRILEMVNYYRQSLADRDVKSADHVDAKFAST

VKICVQHHVIISEFVATLEKVFSWVVFSQFFVSMLTLCSSIFKLSQKGATGTEIVTFVGY

FVTMSMELLFYCWHGNEIKLRSLSLSDAVFATEWTILPPKIRRSLALIMARSSSPIKITC

GFTLPMSLETYTMVLKASYSAFNLLQKS*

>RcyaOR20

MWLTPVYPRSRLSAFKYTLYFLSISGLFSLPMDETSFTYKFFYNSYFVFLMSNTIVVTLL

TGLDLFDNLNDVDILADHGVIFSALVVMLIKQNGLVKNKRKIELWLARLQSRYNKANAIE

RIRFVENDKESFYQIKIFSVIWILITSSYFLPIYFNTADEFQLPTVSTKFFDPRSMTKFF

FIYAWNIFALSVAILGVFSTDLFMVAMYNEAASRLRALGDVLENIELDQDDSSRSDNRRF

VKESVDEHGDVVKLIGELNDVFYWTLLIQSVFVAVIVAGCGFYGLVVEYTAR*

>RcyaOR21

YITGCFIQLFSFSYFANQVTALGLKISNSVYDCGWESLSNDAANDSPSWMVKKNYRKSAV

FITQEMIRRSQEPILFTGGRFYVLSLETFRAVVSVSFSYSAMLRSLIDD*

>RcyaOR22

MESSNFKQALTFTILLTMALQQMFIYSFAGNYLTSQGAEIRMAVYKVNWYELPPSVSKLF

TLIMVRAAEPITITAGKFYPMSLPGFTRLLNSAASYLSVMRVMNTDKLN*

>RcyaOR23

AITMAEDLRPHFLIFKILGMWTPSFESATSYYFYYIWRVKIIVYMSIFFLPQVADLYLQENIEGIIKNFELSTVTFMTLVKVSVLLLKRDQIIETLNLLQLSFCVPKIPAER

>IkuwORco

MMKFKQQGLVADLMPNIRVMQFSGHFMFNYYNDGMKFMHKIYCIIHLCLILLQFGLCAVNLVLESGDVDDLTANTITVLFFTHAIVKVVYFGVRSKLFYRTLGIWNNPNSHPLFAESNARYHAIALTKMRRLLFAVGGATVLSCLCWTGITFVGDSVKKVTDPITNETMMVEIPRLMVRSWYPFDASHGMMHVLMLVYQFYWLMFTMMDSNSLDVLFCSWLLFACEQIQHLKAIMKPLMELSATLDTVVPNSNELFKAGSAEHLRDTTGTAPPPPQPQGDNMLDLDLRGIYSNRQDFTATFRPTAGMTFNGGVGPNGLTKKQEMLVRSAIKYWVERHKHVVRLVTAIGDAYGVALLFHMLITTITLTLLAYQATKVNSVDVYAATTIGYLLYTLGQVFLFCIFGNRLIEEVSLSASNIRQPPFFERSLFNFN

>IkuwOR1

MFPSSTNTKCAQAHYDLPIHVNVSDHQSGLETSCKFVQLDQESDQQDFKSDASFAVHLSRRYLKVLGIWRSDDQFFWRLITNISMLICYFGLGMSVVPTFIFIAVKVEDPIGKIRLIGPWSFCLMAALKYYFLRSHRCDIENCMKNIELDWIRIEYKSRRDVMLEHARYGHLVTMICAGFTYSGGLLFAILPFVLGNLGPFEASNGNISRSHSLPSHFVFFDASETPAYEIIYFIQVITTFMMHSITVASYSVAVVIVMHACGQLKLLMDKITQLVENEDGKKERSLDDRMSDVISHHVRTLRFISSAERMLREICLVDLGGCTLNLCFLGYFTLLEWGAEKTDFIAIMTYLTLFTSFLFNVFSFCYIGELLTGECAKVGEITYMIDWYRLPSKKSVGLCLVIAMAHSPVTLTAGGAIQLSFACFASVVKTSMGYLNMLRAVMV

>IkuwOR2

MGLHLDTTNSHNRLEKVSNKNYESDVNHSLLYTRWFFTFLGIWPYITPEPTRLERIVSIIMMPFCCIIMVLVPIPSVAHITMREVDRMEIVMLMGPLGFYATNIVKYFILMFRLNTIKLCIQHMKSDWRRLEDENDREIMMNNLRVGHGLTVVFTVFMQSGGLFFHAVMPLCTGSVINELNKTVRPLAYPGTDIFFDSQASFVYEIVFCGICVCAFFHYTFVAATFNLISIFVTHTCGQIEILLTKLSGLLKTRAEENSVSSVSDRLNLIIRWHVRVLRFLSWIDEALCEICLMEVVSATLSICLLEYYCMMEWSKGVGVAIITYILILLSLALNIFIYCHVGELIKDKCYQVGKAAYMIEWYKLPGKTEATIIMIIAMAYYPRKLTAGGMIELSITTFGSVRTFMSQNKLKKSIKMTKSFLDYQDYFRIPKHVTKRDVISNL

>IkuwOR3

MHHHETEKNIVRFSHEKTLDKSLKNDADYAVQISRRFLSLLGIWNWDKSGNFSWRFVFSNISVIICYYAIGIRTIPTFFYIALDAKGSAQICILIARIIFGIVAGTKYVYLHSRRRDIEKCISHIEIDWLGNGSSTKREIMLAYARYGHLVTNICAGIAFSAAAFYAILPHVIKKNASPVINENGTHQVVTARAFAVASHFGTSRASQTPVFEIIYTSQVVATFLMHSIAVSCYSLAVAIVMHACGQLQILMIKLGELVQVDDEGKEYDNFDNRLSDVVDHHVRVLRFISSAEKLLREICLVDLGGGTICMCIVGYYNLLEWNRETKNIIGIVALFLSFITFMFNIYSFCYIGELLTQECTKVGEVTYMIDWHRLRGKQSLAVCLIIIMSHKPLTLTAGGTIKLSLTCFASVVKSFMGYLNMLRTVMD

>IkuwOR4

MKLKKKMAKQSLPVHEVTTKRSKDDAASAVKLSRRFLTVLGIWQLDEKGHFSWRLVLSYFLLILCYFGLGIRTIPTIIYIFLDAKEVVQICILISRALFCLMACLKYIFLKLHRRDIENCVKHIEMDWLGVESSANRDIMLEHSRYGLLVTRIIAVFTYSGATWQAILPYVLKKTAAAVANDNVTQVVTIRTFPVPSHFGFNLATKTPLFEIISTSQIVATFMMHSIAIASYSIAVVSVMHACGQLKILMEKINHLIDGNGETAEDNVHGRLSNIVRHHVKTLRFISSAEKMLREICLIDLGGCTLELCFLGYFNILEWRAEHKNFVGIMVYLTLFVTFTFNIFSFCYIGELLTEECSKVGEMTYMIDWYRLPGKQPLALCLIITMAHSPMTLTAGGAIQLSFRCFASVIKTSMGYLNMLRTVMD

>IkuwOR5

MFKNSKNMASSDLSDTLAIKLTRFFMRFTGFWIWDDKRGKILMQMAMVYTIVATVFAWIVTATDLWFSRQSFYQLAYAACNSMTINIILLKLIVFLIHREAFLNLIQFSYKNFWQRKYDTFGQSILQDCESRCTYFVCTFTFFAQSTVCSYTIQPIIENYGKNETDRILPFNIYIDFPITTTPFFEITFFVEIMSMYHSGICYFCFDNLLCIMIVHATGQFRILQKRFEMVYDSCENYELTEQTNGLSKGSEKYSKSPETTGAQYNEFKACVRYHQSLIRFTEMVEDVYTLVILSQVVIFSLLICLVSYQAALAEGTLMRRIIFMVHTAGTLTQTFMFTLTCDDLKRESGAIAESAYHAQWYCRLSSRERRTHCKDFIFVMMRARRPCCLTAGGFFPVSLETFTTILSTSMSYLTLLRQGSMQ

>IkuwOR6

MKQERIVSSTGTWNKDTIYALGLCRMLTQVLGIWPLECDNFFAKIRVLVVASLQISMNISLIRELIADCGPFNQMVDFVALLACSTLALLKVLVIRKNHEKMLRIIVSAMKDWSSIVDDDSRLIMIKHAYMGRFVFIFQLGSAYMGCVPMFLGTIIQLIMSLFSGPKISNLMGLNDTTINVTEAIRYLPMGTPCSVFEMATSMYVAIYVLQVVQLFMTCSCNIGTDVYFFILVMHVCGQFELLNDSIEKFGLGKIDENHFDDNYKQQLYEIVERHNHLARMTKYFEDIFNLIILAQLTASGIHISLLGIQFILGLRYGDVNTVIYVGIALSVLNLQLFLYSYAGDRLSSQIEIIRDAVYSCPWYNMSPKIVKNLIIMIMRSDCSFNLTAGKVYPMNIYNFKNIVKAIASYFSFLKLMLPA

>IkuwOR7

MLVASASTSTNPKKPLNKTYESDIKRSIQYSRWFLNILGVWPMISKSASTPQKIFSKIIIVFCFIALDFILVPVSLDTILREKNALVKLTRFLGPISASLSSVTKYVFLLIRCKNIRLCMEHMESDWMTVEKENERAIMISNVNVGRKITINACALIYTGITFWLSISPLLMATKINERNETIRPLPHPGYDLFVNTQKSPTYEIIYFTICATGLLRYTVTMTACNFAAMIVSHACGQIQIVMARLECLFDEIEGEKNNDVLQGRISSIVHCHVRGLRLSTRIDDVLREMCFIEVVTSTLVMCNFTYNIQTGFQNNQTVLIMVNFLLLISYILNLFIFCYIGELLKEQYYEVGKSTYFIDWQKFPGKSGLAVVLIIAMANVPRKITAGQMMELSMDTFGLIMRTSAAYLNMMIAMTD

>IkuwOR8

MPFVGAFNHKSPAKPLNKFYKSDIESTIQYSRWFLQSLGLWPMISKNSSTIEKYISKCLIVICFVAMIYLIVPAALYIILKEKSTIGKVMRLGPLGACLSIIFKYVFIVFRCKTIKLCLEHMEYDWMTVEKDNEREIMTKNARVGRAVTIIACVFMYTGGMFYNMIMPLLKGNVINERNETIRPLVYPGFDIFVDPQKSPNYEIIFCTTCAAASVRYTVTIAACNLAAVFVSHTCGQIQIVISRLERLFDGIDGEQNGEKLQERISSLIQCHVNSLRLSARIDDVLQEICLIEVIAATFVICLLEYHLLMGWSNSETVSIITFFALLLSYIFNIFIFCYIGELLKEQCNQVGTSTYLIDWYRLPGKTGLAIVMIIAMSNYPRKITAGRMMDLSITSFGMIMKTSAAYLNMIRTMAD

>IkuwOR9

MANVRNREAIFDKISNKDHEADINYALQHTRWFLTSLGVWPYVASNPTKMEKHVSKFMLPYCSISMFVLIIPIFFHLALRDVESTELILLLGPISFGVTDILKHFILIVHSDAIKLCIKHMETDWRRIDNESDREIALEYLKVGRGLTITCTICMYSCGLFYNILMPLCSGNIINELNETVRPLVFPGNDIFINLQKGYNYEILFFSNCVSAFFQFTVVTTIFNIASIFVTHACGQIQIVISRLENLVSSDDGECDNFTIEERIAFITASHVRVLSFSSAIDEVLREMCLMEVVSSTVIICLVEYYCITEYRQSDSVAIITYVLLLISLSFNIFIFCHVGELLKEKCQQVGKAAYMIDWYKLPGRTGLSLIMIISMGNYPRKLTAGRMIELSITTFGSIMRTSFAYLGMLQTVTES

>IkuwOR10

MEVSINGAASKDMDSSIWRNKNHQTDIDFVVKIARTLLTPIGIYPLYGNENQTARILARLQTIIVFCLMCFLLTPHFIYTFFDAEDLRPLMKVIAAQIFSLLAIIKFWTMIINKEDLRSCLEDLESHWRDVTCEEDRSVMTESARIGRFCTIAYLGLSYGGALPYHIVLPLVAERIVKEDNSTQIPLPYPSDYVFFVPEDSPGYEMLFVSQILISSIILSTNCGVYSLIAVYVMHACCLFQVVQRQLETMFKDSGSLDELTKRLAVIIENHTIALRYADRVEKALNVVFLSEMVGCTVIICFLEFGVLMDWEDRAVIGVMTHAVLMTSIFVNVYIFSFTGDRLKEQSEKVCECTYGLEWYDLPKHLAKDLMFMMIRAGKPATLTAGKVFDLSLQGFCEVVKTSAAYLNFIRAMVAL

>IkuwOR11

MSGAPIISCDSTMEHDTTEKSVTWNSDTTYALGLYKLITRILGIWPPKCEDIFSKTRVALLAFLQITMMASFIGEVNTDCSSINDIVEVISLLACAVLSLLKVVVLRAFRPKMLEIINSSLEDWTTVKRPKSRKIMKNYAKIGRSVCIFQMTSAYVTTIPMIIAALPFLAPEVNATGSNESVPALRGLPLRTVCIFGDMPDLIYALVFTLQALQLLATCTGNIGNDVYFFGITMHLCGQFHLLGEDLESFQMDVDEWAQRKKLVNLIKRHVRLSQLAQYLEDSFNFIILVQLSANAFQMCLMGIQMILSLKLGNTLMVVNTVIVIYVMSLQLFLYSYAGDRLSSQIENLRVSAYFFPWYEFSPKLGRDVLFMIMRNHKSFSITAGKVYRIDIDNFKNLIKALGSYFSVLRIMFDA

>IkuwOR12

MNINNRDRKVDEIENKNHVFDLKNAIIHTRWFLTFLGIWPYVISKPSRTEKYISKFLLPFCSISMIVLVIPILTYVILQDVDRLDLLILLGPISFQTTNIVKHFVLVFRSGSIKLCIEHMENDWRNIVSQNDRDIMIRNLRVGHGLTMMCTICMYSGAISYHTIMPLWSGNTINEMNETVRPLAYPGTDLFVDLRSGFNYEIVFCSNCLSAFFHFTVVTAICNIAAIFVSHACGQIQIVISRLENLVDDDNGIDDDKNDVEERIAFIIRCHVRVLRFSAIIDEVLQEICLMEVGASTLIICMLEYYCMTEWSNSESVAIVTYVVLLISECFNIYIFCHIGELLKEQFAEVGKASYLIDWYKLPGRTGLAIILIIAMANYPRKLTAGGMMELSIESFSNIMKTSVGYLNMVRTIAT

>IkuwOR13

MLALDQNYLSFNIRSLTMFGMWNPFHETDQKSLVYLYYAVTLFCLAGVTQTSAEIIHVWKSRDDVVMFTQRFTIATGMFSTMVKVVNLWRCRLNIEDVLDLLNWERRQPCNRKFAIYRDKIVTSTIRICRTFSLSFIIMVFWYSVFTYGKLLIYHKGNIDMLPLRPLLHLRSNHSTIYWLLFTLDEATFFYIAGAVASHDSLFMVFLIHVGTQLDLLKRRLESCQEEINDKDSIENDYSSYSLKVECVCRTSFQEQHLNPINELHTCIQHHQKILRYVSIIQSTFSNTLLLQFASSLVMITMIGFQIVGENTLSSNELIETLSLLICALFQLFLYCWFGTDIIAKSESIALSAYSSNWYVSDEKYKQSLKILLCGGQKPMRLRAGYICELSSSTFMNVISKCYSSMALLNRVNE

>IkuwOR14

MTKEHTAMGKSIKWNSDSVYALGLCRIMAGALGIWPLIDDFFSRIRVFIVAFSQVYLNVSLIRALVMDCGAMNKLVDSVALIACSSSVFLKIVTLRINQRRMFRIVSSALEDWCVIQDAKSRKVMKSYAGAGRFVFILQICTAYLGSIPRLIYSLPRTVPVSAIITNETVANLTATGSVTIRGLPMGAACTVANVSSQVYVAIYVLQIVQFLVTASGNIGSDVYFFGVAMHVCAQFELLKTRFEDFGRDAVTENDKCVRDQLIVLVKRHNFLAGLSDDFESTFSIIILTQLTVNAMHLSLLGIRLILGIRYGETVGIIYVCMAIYVLTLQLYLYCYAGEYLSSLMEDLGDAAFKCCWYNLSPTIIKDLLFVVLRSQCPFYLTAGKFYAMNIENFKNIVKAIASYFSFLKLMID

>IkuwOR15

MSSKPKDNYPTWNADTDYAIGFYKYISQLFGVWPFDPRNVFSEIRIIVAFMFQVTMGVHCIREILSSCVQDREVVGLFGLFTASVLVAIKVVVLRLNQTRMAFIITSAVVDWCDVKDPQSRDTMRLYAHTGRIIFTFEAILVTLAIGSLALISLPTIVDTEITGNSSLLASSGDPLTVPIATKRLLPMGTDCFVADFSSALYVSFFAFQVVQLFVNGVGNMGNDAYFFSLTMHVCAQFELLKRRLEKFGYNQDKRICREEFANLVRRHNHLMAVTMNFEKVYNPIVFWVLATNAVHLSILGLEVLICMKSGDLSGVMQVITKICVLYAQLLLYSYAGDCLSSQNSKLRDAAYNCRWYDLSPIIARDFIFVIMKSNQSFRLTAGKVYEMNMNNFKNIIKTMFSYFSMLRIMFNM

>IkuwOR16

MAPASNKLPSIRLTSLFLRFVGFWVATTAREQWILDFALSYTVIAVIWGTGVIMMDAYYSIGDFNRFAYALTNVMTLLMVLFKVVIFGIKRQKMVELIKYSKKNFWEADYDDIGKKVLNDCEKECFVFVCAFTVFALGTVISYTITPIIDNRGRNETDRNLPFNIWIDVPATTTPYFEIIFVIQTLSSFHVGIIYFCFDNLLCIFNVHVAGQFRILNSRLAIAVCDVGKEHKTNGTANLTANEKSLFDPYHSLQTIKTCIRQHQGLISFVEEMESTYSLCILGQVLVLSALTCLVAYQAFLVSGPFLRRIIFITHCSGTFTQLFMFTLTCHKLWDASVEVNDAAFYSGWHLLNSDNFPAVSLKRDILLMMMRAQRPCCLTAFGFFPVSLETFMKINSTAISYLTLLRQSAGDN

>IkuwOR17

MYDRKHWSNDARKALALFAAITWPFGLWPLIPVNLFLNARVILGIVLVFGTVAIPLREICVRCGTAEDMIDDVIVVASGLLALSKLVCYSVYRDRLRPNVISAIEDWSSQEGKDFRKIMAAQERTYKSVAVALISTAAASTFLYSVKIFFTEPDRFIEAEDNGDFIETDGASNNTTRLVLRRRFLFPSTCTLNNVPDMIYPTIVLTQYLQVLATCTVNTGSDAFFIAMTSHLCGQLEILKIKFSSLGQEDDPVESRRKMSTLIARHGHLLKLAEMLEDAYNMIVFTQLLVSVMLITVFGFCFLMTLEANNYVGAIKNIVVIEFMLLQTFMYSYVGENLQCQGDDIIQSVYDSSWYQLPNSLSKDLIFVMMRSNVPLQLTAGKFFSMTLATFMDVIKTSASYLSVLRIMIQE

>IkuwOR18

MSVHNKVTIENNNFTNDRESDINYVLQYTKFFLRCIGIWPLVSSNSTKIEKAASKFVIPYCSVTMCLLILPISLHLTMRDVGTTETILLLGPFCHSSTDIIEHFILIFHWDLIKYGVQQLENDWRGIESQNDREIAMRNIKVGRSMSFMCAFGMYSSGVFYVVLMPLCSGNTINEFNETVRPLIYPGNDIMIDLQNGYNYEIVFCNNCIATFLHFTVVNAIFNLASIFVTHACGQMQIIMSRLESLVEETDVTKTQDRISFIIRRHVSILKFSLKIDKLLREICLIEVVASTINICMLEYYCLLEWRNGNKLAVITYGIVLVSMVFNILIYCYVGELLKEKCEEIGKAAYMIEWYKLSGKEGLALVMILIISNNPRKLTAGQIIELSIATFCNIVKSSFAYLGILQAVADQ

>IkuwOR19

MTSVQMSTVDVKFVNDHETDIDYVLRYTRFFLNCIGIWPLVSSNPTRIEKIVSKFMIPYCSFTMFSLILPSYLHLVLREVGTIETILLLGPLCHSSSDVLEHLMLISHSEKIKSCIQQMRNDWLSLESENDRGIAMKNVEVGRNLTLLCTVTMYSGGLFFAVIMPLCWGNTINELNETVRPLVFPGNDILINLQVGFNYEIVFCNSCIASFLHWSVVNAIFNLACIFVTHACGQLQIIVTRLENLVDETDAITIQNRIASITRRHLRVLKFSSTIDQLLQEICLMEVVVSTIIICLLEYYCLLEWKNGNKIGIITYVMILFSMVFNIFIYCYVGELLQEQCKAIGKAAYMIEWYKLPGKTGLGLIMITIMSNNPRKLTAGRIVELSYNTFCSIVKTSFAYLGMLRAVADD

>IkuwOR20

MSAHNEVSSVDSKLKNDQQSDIDYLLQYTRFFLSCIGIWPLVSSNPTRIQKIVSKFVMPYCSITMLTLILPAYLHLLLRDVGTTETILLLGPLCHTSSDILEHFILIFHSDLIKFCVQQMENDWRQLESKNDRDIAMQNLKVGRSLTFMCTVIMYSGGLFYAVLMPLCTGNTINELNQTVRPLTYPGNDIIIDLQNGFNYEIVFFNACVASFIHWTVVNAIFNLACISVTHACGQLQIIKSRLDNLVEDTDVMTIQNRIGTITRLHVSVLKFSATIDKLLREICLMEVIASTIIICMLEYYCLLEWRNGNKIGVITYVLILGSMTFNIFIYCYVGELLQEQCKAIGKAAYMIEWYRLPGKTGLALIMINIISNNPPKLTAGRIIDLSIETFCSIVKSSFAYLGILQAVDE

>IkuwOR21

MGFAINFRNGVGDCREKAEDLFQQPRWRLNIISLSLIGNWPFQKRSERIMLSALTFFFFGTLLTAQIRKVYFERDNMKVIIDSIAPFIFEGVASSKIFNNIINIGKMHKMVKHIEKDWEEIEGEERKILIKFANQGHMFNVVYCVWIYGAMVGFLILPITPRIIDDLGWANITDTARFQVPVDYYVDENENYFYIQLHIFIAVIFLCIIVVGTDIMFITLVQHACGMFSAISYTLESLGADEDANYDLYPERSADETFWIVVGCIKKQNSILQFAEILDSNFCWSFLVIVGLNMTIITFTGFQMTTKLDSVDEAIRQGIFTIGNLVHLFFESYISQRLTDHSLCIYEALKQTRFYNTSIRTRKLLNLMLLKSVIPCTMKAGKLYVMSMENFSMILRTSMSYFTILRSFQ

>IkuwOR22

MEKKNPGYVYAYGWNRINMQVIGVWPEIKQHWIVKNRVWGYASLIMLIIWIPQAASMAFLRGNLNELIDCLVTNVPVGISVMKLVVFRLRRQALLAILALMAKDWSISRTDDERNAMMKMAKYSRFISIMSVSLANAMLLAFPGFRAWSAVYERKLITNETVLAIGFLYPAYFPFDTKEMSSFLPTWFGQWVATIFSMIAYSGPDSFVAMMVLHLCGQLATVRIALVNLVDEESVKDHSIYWTRLSDIVRRHEELNRYGELLEGSFNGMLLIQMILCTITFCFQGFVTFTTMIEGMSSAEDFPVLQMVFFVTHGFYTILHLFVYCWVGDLLVVESTAISRAPYECDWFRLPATHARALMMVTNRSRIPLQMTAGKFVAFSLELFTSIMKTSMGYLSVLLAMKDRLID

>IkuwOR23

MTTVKSQGFKDLQWAVGLNRLSTKICGFGRVRDGGSDWLSIVLKLRIPIFAVYLSIVLIIPMATALLTVWGDLFLVSDNLKLSLLWVIVELQYITLWQKDEEIAKMMRYIEEDWMKPKTEKERDIMVSYGKLSRILTIGGYVIVVVTILSDHIPVLFGVILRTPTNLTDFDFDRPLVMQTIYFFDVYHPPVYQIVVANQFIAGSIGGLCYTTVGTLFGVIVLHVSGQFEILYSRIENLVEGDDTDNLQIKFRITIEEHSRLIRFAEMVEDTFSLMLLEVAANFAMIFCLQGYLVIVMISDEIDRPLSQVLFGVMYGLNLLFVSLVYSAVGDTLVAQSEKIQYATYNCEWYKLEPWEAAQFIPLLVRSQKPQVITTGKFASLTLPTFATLLKTVAGYISCLLAVKE

>IkuwOR24

MPPNKVWQSDIETTIQYSRWFLQFLGVWAMVSRTSSQFDKTISKFFVVAYLIFMAYPLLPTLMDTFLRQTITIVKIIRIGPVGAILTSIFKYLYIVLRCKSIKLSLEQIEYDWMQVDNENEREIMTRNAKLGRGLTVISCVFMYIGAVFYQILMPIMKGNTINARNETVKPMVYPGFDMFFDLQNNRTYEIVFGTNAAAAFIRYTVTIASCNLAAVFVCHACGQIQVLMSRLERLFDEIDDEKENSEELQERISSVIHCHVRVLRLSTRIDHIMREICLIEVLNATFLIILIEYSAVTGLANSEIVTIITFGVLLFSYSFNIFILCYIGELLQEQCYEVGTSTYLIDWYKLPGKTGLAIVMILAMASYPRKITAGGMIDLSIANFGAIIKTTVVYSNMIRTMAD

>IkuwOR25

MVSTELQPDKDIEWAIGVNSWSLKVCGIWRSENNSNWLNAFSNFLVPFYVLIIIIFGLFPQTFALFRVWGDLTLMVENLITYLPFVVTLCKIVTMWYKKEVIITMMNFVREDWRKLKSKKEREVMIKYAHASRMITFGGYLVIVATVLVYHPPVIFGVVLRTLSNITDTGNRPLVLQTIYLFDVYKTPIYELTVITQAMSCSLAGFCYTTVGALFGVIVLHVCSQLENLTFRLEEMLKNDKEQMNFRKLFSLTVKEHQRLIRFVDMIENTFSIMLLMIVPAFTITFCVQGFQLINTLGDDVKRPMVQVVFCVVYMSFIAFVMFVYSSVGQALATQSEEIQYAAYNCEWYNLRPKEAAQLILILIRAQRPLQITAGKFVPLTMSTFATLLKTTAGYLSCLLAVHE

>IkuwOR26

MKLRNFADYSWFNRILLHACGVLPLESRDFLSFLILLTPFLSSGFLSLPAIHTLVFDWNKLTGMARMDLVVQHVEIIVGVIKVLCLIPKRTKLTRLTKSCSRLWESVDYDRDCETVEPYAMRGLYMTYGFALNVFACCSSFFLTPLFSRFVVDENGTVLVSKSLPYTAGIFHENIALFNVWHLLQVPIGFTSVTAIIAIDTATAFYILHACAHLRLCQTFFRRVANDFATEKPLAMLDNEWPSNSDKIFKNVIRCVVHHQDVLQYSRDVEHIFGPVMLAQTLLSISAICGFCYNLLVEEDMSGRPRFMIHLIGVIVQLLIYCWPANTLQEESIMVADAAYNLPWYDWKSKQGQLVCIIIARSQIPATISAGKFTMVSLETYASILKTAFSMVTLLLRVLE

>IkuwOR27

MYRQFATMHLAKSSNKPLNRDYEPDIEKSEQYSRWFFEFLGVWPMITKNETMAKKCVSKFMMVVCFLAMCFPLVPVSLDTFLVQKSIFVRLLRLIGPISAALSTLFKYIIIIYRSEKIALCMEHIKSDWMEVGKEKERAIMIKNVKVGRSLTVSACVIMYSSVMFYFLMKPLIIGSKLNEFNETVRPEVYPGFNLFFDSKKSPTYEIMFCTLCVSACIRYTVTMAAYNLATTFVCHACGQIQIVISRLQCLFDEIEEGLNHGKLRERFSAIVYCHVRGLRLSTSIDDVLREICFVEVVSSTLLICLYEYMIQSGWENSAILELSTYIFLLCSWIFNVFIFCYIGELLKEQYEEVGKSTYLIDWYRLPSKTSLAVIMIIAMANIPRKITAGPMFDLSMASF

>IkuwOR28

MGDEKMGDVFQQSRYRINVILLTVVGQWPFQETNQRRITFGVTLFFSCSLFVAQVRKVYFEGDDLSVVFEAVAPFIFEGICASNLLNNVFNVGIMRQMLKFIEGDWKNIQGEEKRILTAFADEGYMLNVFYAVWIYGSMTLFLILPIVSKVIVAFGWANMSEAVRFQVPVDYYVDDHEYYVYLQMHLCIAVTLMCTIIIASDIMFIMLVQHACGMFSAVSHTLEHLVEDEDLELDLYPRRTDDETFWIVVDCIKKQNSAIKFTELLESGYCWSFFFVVGFNMGLLTFAGFQIIMHSDSVDEAIRQGLFTGGEMVHLFFENYLSQRLTDHSLCVYEAINKARWYKTSMRTRKLLNFMLLRSVIPCTLRAGKIYDLSMENFSKLVRTSVSYFTVLCSFQ

>IkuwOR29

MDIFQSRFYRANKTLLSFIGLWPYQKHKTWRMFQQFFCPFFVISVITPQLIKLKDIWGDMDVMVESLTAVSVQMVACIKFFNGLFHQKAMKKLLDNVKRDWSSLRNKKEIEILTQYGNEGRNLTILHLVFIYSATFGYLMIPLMPTLMDIVIPLNESRGPVYLYQSEYFVDPDEYFLLITLHTYLASLMTMTIIIAVDTMFICSVIHVCGILALIGHRLENLLPKRSDRDFGFYKLSKADHDRCHQEIVLCIDHHFKVTEVAKNIESSYSMSYLLVLGISMVCLSLSGVQLLIKFGQIEEMVRLFQFNLGQCSHLLFNSWPCQRLIDESVRLRESIYAAEWYSLSEENKRLLRFVMLRILNPLQITAGKLYLMSIENFGLVIKTSMSYFTVFASIR

>IkuwOR30

MEKKSSSKLLSYLSYTSTTLRLVGLWPATEKNSKADSGIKGILNFVYFVVVALSLIVQAGQMLTNCWINYTNFESAAESIGPMMALVTSFGKMCIYRRQRAILGRLIQSLENCLNHGPSEVLENLENYVKYGSLGCGSLLGMSWLLTVGYLSAPIVGRARVLPFASWYPFDLENSMILYSLAYSHEVFLTVLGCCTMSTEITFVLSIFHCCARLKVLRGKLETVADPESHDNYDDFHNKIGAKLSSIVKLHCEILRDIEEINFAYTYIVMVLFFAAVIAICCAGLQVTSDSAESTSWTILFLVLAMYYAEQLLFYYLPSEILVQEALAVSFSAYACGWESFEIKHRKTIGLMIMRSYEPPKLLAGNLSPLRLENYNAFLTTTASYFTSIRAVADA

>IkuwOR31

MDFFESLHYRFNKRVLCCLGQWPLQSQNEHYFYRTMTVLIIASMIVPQMIKFISYLGDLRGMIECIAAIGLHFRSVVRFINSSVKTTTMRKLANRIKDDWTVRINEYDETLLRSCAERGQLLSVVYSVYMFGGTMLFLSIPLMPIVLDAVVPLNQSRGRIYLFQLEYFVDQDEYYICIMIHACIAIPVGIAIIVACDTMHAVYVHHACGIFATMGARLQDIQSIANHEKLEICEDHRKRTDKAYDDIVACIKMHIEAVEIAKLIESSCCISFLFVIGASIFTTTVTGFMTVTNLDQPIVALRYALVVVADLMHLFYICWQGHMLVKYSEDIFIKAYNVDWCDMPNQTKKLLIVIMLRSFHPCTLTAGKIFVLSMETYAAALKSTMSYFTVLLSMQ

>IkuwOR32

MTRFYMKIVGMWYVEKKRDRIISNVVLVYTVLTMLIALVVMGTDFYYSWGDLHAVSYNAPCTITVMLELLKLLLFVYNRRNVMDFNAFTENTFWKIKYEIVDMTILNECNKKTMVMNGVLALLMQVIAWHYLSIPMAESIGKNASERILPFKLWFNMPFTETPYYEIAFSLQAAATFSVSICTTTFASFLFTICIYATGQFKILQRRLESCCDTFEKNMLHDGSLKNIDHLTYDDLKSCIIQHQMLIQYMDRVENLYCYIMLGVALGSVLQICFSGFQVLLGADESIPRTALSIEFFVGSIILLYLFSWACHKIIEESTAVAEAVYRGSWYILPSYKWGNDYRTAILMVVTRARRPCVLTVGKFTPMSLETFTSVFSTSLSYFTILRQMNEETE

>IkuwOR33

MDVFEGPYYRINKFLLTCLGQWPYQKTFQKRIIRTVLFIFSVSVIYPEILYMKASWGDMDAVIESASAFGVEVATGMKISNYIFNADKMKIIFNRIHEDWKVNMLGPQLAVLMKYADEGRQLTTFYTAYLYATLVAYLMFPLVPKFLDQFMDLNQTVPIIPFPIKYGDLDPNEYYIPMMIHSNCTALLLITTIVAMDSTYLVYVQHACGIFAAIGDRLEHLSDLSDYEELDELSAKKQEEATYREIISCVKLHSEAIEFADTLESTYVVIFFFVLGLSIFCMSLAGYQTLMNLDKPNEALRFATFTLAQVAHIFTLSYPGQKLIDHSERIHEWVYGSQWFKVSERCKRLLMIMMMRSIKPSNITAGGMYVMSFPNFSMVIQTSVSYFTVLTSFT

>IkuwOR34

MCLFAITVFSDLCLNYNDLIILTDDGCILAGISVIIFKIFNFQLRSKRIKSLIKAVHTPVVTLNQCSDQRVRVLIQTCSFYEKILLYGFWAVGAILSVALILLVPVEEGALPIRAQYPFSVRTFPLHQIAFSLQASAVSIGLVSIIGMDTIVIGLYKWTNLQLVILNANYANCLKSKNKRATLIWEKLPMRTIGGTASKPSIEEPVNQITCFIPFNVKEAANTDGDTFIRRFKTCIKHHQRLINCVDELNEIFGISMLVQLFASFSMICFTGFQAVLGAKNLSSLLKFGVYLGAAFSQLLNWCWNGNSLKYQSASLPTSQWLSGWEHEYSPQVISLMIISLMCSKKSLGLKAGKFYTMSMETFIAILRSSYSFFALLTKMNEAKSGYESHIEP

>IkuwOR35

MKVLTVNFLVLQYVGLWRPLFWTSWWQKMLYGLYTCFILFLVFTVTASQLIALAIGVDSAEEFANCTFMSLGFVAVCGKSITILAKRSAIIKCVDELGREPCKLRSEEELVIQSGFDKIVRISFLVWATAVSVTVAAILASSTMLLVPNRILPYKAWLPYEAHFSLSGYLISYVHQMVALIAGGTVNIGFDTLVPGLMVQTCAQLNVLKHRFHEMPQAIINNGNTLRNGSKPISSSTRLEMELVSQCVGHHLAIFNFARTSNALFAEMLFSQYAISTLILCVNVYILSKLEPMSPEFIASFIYTGTVVTQIFIYCFFGCEATFESLSIAEALYTIDWDTFSVYAQRTLLIIMARSLRPIEFTSGHFVTLNLDYFTSLLKLSYSAFNVLQQSD

>IkuwOR36

MDFRSENKFNAIINILSGNFLPMTGEKTKLGFFRLTYMMIVWIIRLIYIITTGIGCFSYVPIMVAIRDGGVTGIVIVETIILWIYLNLRRDYLHNLIGKIESILVDSDDLRRIIRDTVEPNKNRMKIYTIATVGSVVLWAALPVLLVLEKNTFTYTDYVLPTYFPGEPFTVKTFVFGIIVDTIGGSYVIVNKNAIDIYVSYLITILTSEFRYVNEQITMILCGTNDEKDTDKMITSLRKCVEHHCIAIDIGQMLAKLLYLNVGVTYLNCILRFCLLGFALVATPGAYFAKCIYMLFTLGNLVQVYFLCSCVQELLEASTSITDDAFHEDWYGRGSAIRNMFQTMGLSNRIECRLTAFRIVDLTVPSFAAILNHAYSACLLLLRMNVSAHADD

>IkuwOR37

MKTLEYSFTALQWCGLWRPAHWPPGWKSKLYDIYTWFALFILVSFTLAQFVEVVHSINDVGELANNSFLMLTLCADCGKAVNVLMKRSEIIELTESLQHDPCLPKNKKELAVQHQFDNMARFNVLRFAAASGFTVVVLVVKSLVEDLPQRSLPFNVWLPFESSESLLGYWIAYSHQMLGICISCGIGVAFDTFVPALMLQICAQLNILKHRFIEMPRSLLDMTNNFKGEEHSHSCTLKAESKLLSLHVQHHLKIFKFAENVNDLFGLMIFLQYTLSTLIICACLLNASQMKILSSLFAVLFIYIAEMSLQVLMYCFYGGEVTIESINLCDGIYEMDWTALSVDSKRSLLMIMARTTRPITFTSAHILTMNLESFKSLLKLSYSTFNVLQTRT

>IkuwOR38

MNYTIQYTRWFLEFLGIWPMVKKNPSRSEKYFSKILIFLGYGLMAFIMIPCMLHMIFRERDSTIRIKLLGPIGLRLTNIIKYSSIILHRKSIKLCIEHVENDWMMAESENDREIMMRNVNIGRSITVLCFVFMFSGGLSYHTIMPLWRGNKINSLNQTIRPLVYPGYDIFVDPQSSPTYEIIFYTTCVSACVTYTVITAACNLAAVFVTHACGQIQIMMSRLDNLFDSVNDKSDLLKDRVNFVIRCHVRVLRFTKIIERVLREICLVEVVASTLIICLLEYYCMTEWNNSDTVAIITYVLLLVSLSFNIFIFCHIGELLKDQSYEIGRATYMIDWYRLPGKIGLALVMIIAMANYPRKLTAGRMMELSVTSFGTIIKTSVTYLSMLRAVTA

>IkuwOR39

MQILSYSFAILTYLGGWRPVIWTTKYSIRLYGLFSSFTIFTIYTFAITEFIDLFNTDDVSELINNCFMLLSIIGACSKVTNVLGRRESILKLVDILCEDLCKPKNLREIEIQDKFERKIRRNTYLYVGLLEIATIAVTTNSLVNDLPNRVLPFKAWIPYNLETFPAFLLAYFHQTLANIICATVCAANETLVTGLMLQACAQLEILSHRLENLPKLIEYPKTVEENKKRIGKHNTLELKLFSDCIKHHHRIIEFSTSLNATFSHVIFVQFAISIIVVCTSLFKLSKMKIMSGEFLSMILYLLAILVQIFIYCWYGNEVMIKSIEVGNAAYAMDWTLLNVNIRKNILILMIRALRPIKFTSGYIMVLSIDSYNNLMKLSYSAYNGLQQSANR

>IkuwOR40

MIKRPTMDFQSLNNFNVIMNSISGNFLPMSGEKKGLGFIRSTYQIFTWIIETIYLSSTAIGLLFYVPAMTAVRDGGVSAIVSVEMLILVPYLSSRHDDLRKLVGKINSILVDSENLRKCIRDSVEPHKKRLQIYTVITISVVTMWGSLSMFELLDQDKHLFTYTDFVIPTYLPGAPFTVNVFFCAVVLQIVGAAYLICKKSSVDVYISYLITLLTAEYRYVHEEITKALDEQGEKTEEFVIASLQRCVQHHCVVIEAGHMLTELMSLNVAVTYINCILRFCFCGFSFVTHPEIHEKALYVMYTIGTMIQVYMLCLCVQELLEASTTVTDDAFHKDWYERGNTVKSIFRTMGLGNRVECRLTAFRIIDLTVPTFGSILNQAYSVCLLLLRV

>IkuwOR41

MRVLPFIFTLLKFCGVWQPKGWSSGWKKNVYWMYTWLVIVAVYTFCVSETVHAFQCVNLEDMANSLFMPLTMACAVCKAGNIIKGRQDIIRFINILKNDNCRPSGLDEAKMLEKFDESIKQTILWYLAMVGTSVGTLSTSSFFIDVPRRTLPFDAWIPFNYTTPLCFWSAYLHQIFAHGFGAAIGTTYDILLCGLISQACGQLRILKFRFEFMTHAIVDQINNGKELNHEENVQDVENKILAKRIDQHRDIFTFATSVNEAFSIVIFMQCAVSTFVLCISIYTLSRMKEFTTKFIFVVVYTSCMLIQIFIYCWFGNEIILESKDVGNAAYAMDWTQLSIRSQKKLIVIMVRSLEPMRFTSGNIILSLDTFISLLKLSYSAFHLLQQTSEE

>IkuwOR42

MKALRYNFIVFECVGLWRPVRWSPGWKTKLYDAYTWFMVFFMSSMTVSEFIDLMGSINNVEAFANNSFILLTMVSICGKALNILVKRNEVIKLENILQNDLCHPRTNEESVIQDKFDQLTRLNTVRYGALTGIGVFVIVMSSFVKDVPRKTLPFPTWLPYNHTTVTGFWIAYLHQILSHVVGAYINVAFDTLVPGLMLQTCGQLNILKHRIGRVPSTVTTCDRKNEVSEKSIKVVEVQQIAGCVKHHLEIFKFAETSNEIFSFVIFLQYTVSTIVLCVSVFGLSKTKLFSPEFFAIFMYLACMSLQIFMFCLYGYEVTLESLNIGDAIYEMNWSTLGITAQRSLVMIMLRSLRPIEFTSVHIVKLNIESFNSLVKLSYSAFNVLQQSQE

>IkuwOR43

MSDLLRTYHLYDDTIRRLLIFTGLWPTANPGILYRLRTLAHGLSALVTSCAILNFCNHHSANLGLFLKGLGLAFSFITIIQKTICLTIYRHRLVEVHGTLASTFSQDLKDRKLQPIVLSPLLSFYRPSLMLSIVTYTVIVMYWITPPIVIAIQYSRGVDVIKYILPYPTRYPWTINGNSWLYPAHYILDVYAGICLGSFTSSIDSLFGYYVFQISGQLRTLSHRLTSIKSTENYGQVIRECAARHQILIRCQKNLECIYGPIVLWMLVTSAIIMCALIFQVSQMNPGKAVLVVVYIIMKSTQILLYGFFGTFLTNENDKFREAVYATDWAGSGKKCFMTDILIMVTYTPPILRACNLSNISVDMFVAMSNTAMSYFFMLRTLEENNEV

>IkuwOR44

MNFRSINKFNVVVNALSGNFLPLSEEKTSANFACTIYVIFTWVLKFIFLSSMSIGLLCYVPAFEALQRGAVTTIVAVETLSLSAYWNFHRENLQNLIGKMNKILVDSEDLKRCIHETIGPHKKRLKIYTIATVITVFFWALLPVMKISESSQFTYVDFVLPSYLPGAPFSTNFFIFWIIIEAFGGTYLIFKKIGMDVYVNYVITLLTAQYRYVHEIIYNALRRDDCGEDEGKSLVIDSLRKCVRYQCEVMEIGQMVRKLLAVNVALTYLSCVLRFCFLAFFIITIPGNYFEKCFYLSYTIGILIQVYMFCSCCQGLLDASTSITDDAFHEDWYGRGKTVKRIFQTIGLSNRMECRLSAFRVVDLTVPTFVAILNQAYSACLLLLRVQ

>IkuwOR45

MADDFSRAKDLYFWNKCVLSIIGVWPLQPSYIIFGLWMVYICIHLTMGYNDLLHVFGDLELMIMNLSETALESMVMVKLLLLRFSKSIANLMDQFIHGLEPESYDGTEEKQIYLNYNRIAKTFFKLTITCGSSTAIIYHLKPMEYRLRAVLNNESAPFVLPYRSRIFFEVNDATTFWLVYIYQTPTIYIHLFHTVAISYLVTLVLHVCAQLSILSLRIKNIKIDPLNEVRSTRLMFQEMVERHLKIIWMAKEIDDTFNLMLLEELVMTTVILGLTSYNVIVNSDMADKTVFISFCLYVSTMLMMVYGYCFAGEYLISESEKVYNAYYQCQWYDLSSSFKKQLSICMTGSAKPLLLTGGGFYVFSLAGFTSVLKSSMAYVSMLRTLV

>IkuwOR46

MVLGVCSKSSEGSIAKQRAWAWAILMIIINWIPRTATLPFLWGNLNAVIECLAVNLSIGVSIAKLIVLQCQRRVIGSILDEIARDCIAPKSKEEIVVTFETAKTSRFISVMSVSLTNMMFIAYTIGQILTGLQTGGVSVVDSRIAFGCYFDSYFPFDTKNPIILIPIWLGQCFSTLLSMASYTGPDSIVSMMVLHLCGQLRVIRHSLKNLVNEKTVRQPKNYWKTLIPIVQRHDELNKLSFLIKETFSSILLVQMLVCSMTFCFQGYVMFTTLMDRNEDSPPMHNLGFAFVYAGVTVIHLFIYCYVGDKLLVESTEIPDDFYDTPWYDLAPEEAKAFLFVCHRSSIPLQLNAGKFCTFNLQLFNAIMKNSMGYLSMLMAMKDRLID

>IkuwOR47

MTDLLQRYHLYDSTIRRLLLFIGLWPFANPSILYRLLPFAHGLSAIATSCAILNFCYHHSANLGVFLKGLGSAVSFITITQKIICLTFYRKRLFELHTSLAGTFNEDFEDPKLRPALLSPFLSFYRPSLTLSIVTYMTIAMYSMTPLIAIAIQHSRDVDVIRYFLPYPTRYPWTINGGSWLYLAHYIFEMYAGMCLATFTSFIDSLFGYYVFQISGQLRILSKRLTSVKPTDYYDKVLRDCIARHQNLVKCQKHLECIYGPIVLWMLVTSAIVMCALIYQISHMTPGKGVILVFYIIMKSMQILLYGFFGTYLTNENDKFRESIYSADWAGSGEKCFMTDILMMLTYKPPLLKACSLSTISVDMSVAVSNTALSYFFMLRTLEEGK

>IkuwOR48

MMKCFSNQRYYRLNKLYMSSLGIWPEQTLFYRCLIPFFFSTTLISIIIPELIRIRDVWGNVDKVIEGIPPLLVMIVSFIKVFNSSINIGKMRKVIHRISHDWEYLNDPESAEVLHNYAARGRLITVVYSIYIYGSMSLYLILPVMPGILDILIPLNETRPRKPLYEAEYGVDADDYFFEILIHSYVTTIVTISVLVSVDSMYFINVQHACALFKVVGVNLKMSLEEKHFKGEHGFGTIRHCINLHKDALSFADLLESTYSTAFAGIIFIYLLTMSISGVLTLIKIGQPDDMLRFASFTLAQAFSLYLNSVPGQNLIDHSLHIHSVFYEFPWYEMPAKVQRLIILMMLRSIRPCVLTAGKVYLISMESYSSVMKSAMSYFTVLSSMR

>IkuwOR49

MRTLPFIFTLLKFCGIWHPSGWSSGWRKNVYWLYTAFVIGTMYVFCISETVHAFQCEDLEEMANCLFMPLSTACSVCKAGNIINRRRDIIKYINILKNDNCRPIGVEEDLILEKYDKQIKQTILWYLAMVGTSVGTLTAGSFFIDVPRKTLPFNAWIPFNYTTPLCFWSAYLHQIFAHGYGAAVGTVYDILLCALISQACGQLKILQFRFQFMTRTIADQIIADENKFNHEDDKQKVESKILAKHINQHLDIYQFASSVNDAFSIVIFMQCAVSTFVLCISIYTLSRLDEISTKFIFIVVYTTCMLIQIFVYCWFGNEIMLEVRDKAWNTINNGPHHTEIYGECDWMIALECNNTARKKLKQSAKNISTIFCAMWEVMYTIVYCFR

>IkuwOR50

MADQIAKYETYASDIKRMVILTGLWPGPVSWELYRYLPIIHVLTALMASTAIINFVMNHISNIALVTRGLSISFSLLSAIQKVIVLTINRDYLIELHRILDETFHQDFAHDELRPKLLSGIAWFYRPTLVLSLSTYFLLPMYMFVPPISILLQYIHGVSPIKYRLPFPSQYPWATSDNLLVFGTHYIIEACAGFAVAGITAATDALFGFYIFQMTSQFRTLSHRMSNLKATDDYETVIKECAVRHQTLTHCRDNLEQIYGPIILWMLTTSAMIMCALIYQTSHMSLEKAIVFSVYIVMKLMQTLLYGWFGMSLTSETEAFRESVYCSDWPGSGEKSFMSNVLIMITCKPLILTACKFSVIGLDMFLAITNTAVSYFFLLQTLEEK

>IkuwOR51

MHILSWNFTILEFCGLWRTRDFSSDWKKHVYNAYTCFSIFLMYTFTLSELIEFVLSIDNVDEVVNNSLMLLSMLGICYKSANLVYKRDQILEVTDLLVNDVCRPQSLEEISIQKRFDARGRHNTLIFGVLSEIAVIAITVGSFLGNVPNRTLPFRAWLPFDHDNFLGFWVAFLHQILAHAMAATIGSIHDTLFHGLMAQACGQLNILKFRLRSMPRMVRENQSKNSGGIAERNALSKCIRHHQEICRFVEMSNNVFSLVIFIQFSVSTFVICVSTYTLSNTSFLSAEFTFVIVYLMCMIVQIFLMCWNGNEVITESLDVGTAAYEMDWSSLEQSTKKDLQIIMARTLYPIKYTSGHVITLSLDSYNSLMKLSYSVYNLLQRTS

>IkuwOR52

MKAHQDMGQLFDWISVPLSLVGAWPLSKTYFRFTGWIVYYSVYLIGAYADLASVFGDLELMVLNFVETGLQNMIVVRLLVFRFSKILPILIDAAKKDMRDENWENDEERQIYFHYYSSAMTFFKTFVGCSCCTTVMYSSRPIQEYFVYGLPNGTNMIMPAYHMRVFVDLDNVRNVVLVHIFQMPLMAGAIFHVTSICLLVALVFNVCGQLSVLSYRIVTLNPSESDDANSVFRKFVTQHLRVIWMAKSIENVFQMLLLNELVGTTVVLGLIAYSSLTTLDNAEGAALATFGSYTLSMIILVYANCLVGEHLNIESERLRDAFYQCNWLELPKSYRKALLICIRAQVPLQLTAGGFYPFTHESFTDIIKKSGAYVSMLRTMTMQ

>IkuwOR53

MQILQHTFIVLKWVGLWRPGHWSQGKEAKLYNAYTWLVIFFLIIVILSQFIGLVKSVNDLDAFANNIFLLLTLVADCGKAINILIKRENIIGLINCLEQDPCQPRTEEELVIQRKFDRIVRFNTLRYAAVVLITVFVALLNSMYEDIPKRTLPFNAWVPFEYVESRWRYAAAYTYQTFGILIGAGIGIGFDTLVPGMMLQTCAQLNILMNRFNKMPEMLRASNSVIPNAEITLLAQNVKHHITIFNFAEKSNAVFGIMIFVQYAISSSVICVSLLRLSKVKLFSSMFAALFVCLAEMSIQILLYCYYGGEVGIESLKVFDAVYEMDWPTLSMSARKSLLTIMVRTLRPIKFTTAHVITLNLESFKSLIKFSYSTYNVLGEVKA

>IkuwOR54

MLEGFDKAKDLIFWNRRLLSVVGLWPLESRPTLFYSWMTYSLLHLFLGFADLAQVFGNLNSMIGNLGETAYMVMVMAKIFVLRYSSVLRKFMKQVEFNNYEVGYKNEEERRIYMSYTNSGLRFFVIAIGWSAVTTTVYYLKALRFTFNSEQPEFPLPFRLRIFFNVTDIATYYLVYAYEGPVIYIYTCHGIIACFIWSLVLNVCGQLSVLSFRIKNMTSDVSKTNNRLESTIREIVQKHREIIWSSSVIDSAFKLALLVELVVCTVIMGLCMYNIIMNFDFAAINEFLAFFMYIFMMLLVMYGYCVAGDFLERESLNVQDSYFECDWYNMPLRCQKLILMCMIRAQIPLHITGGGFYVFKIESFTSIVKTAAAYGSMLRQVA

>IkuwOR55

MNKILMSSIGQWPYQTRRTSRAVLSIVLFLCTTQIGPQLMAVSLYHNEPEILVECLAPLLFDGLCAAKLFTCIVKSQKMLKLLNRIRDDWQVWANDPEVDILHEYAENARKFTIVYAVIIYSTGIMFLTEPILPTIIDILLKNGSEPRIYPFPVHYGQIDMQKYYVYIILYTYVCVSMIMLITIAGDVMFIGTVLHACGIFAAVGSKLRKIGENEKSAGDVYSVKGRDRDYETIAFCIDRHNEAIEYAKLLEETYSSCLFFVVGFNMFMMSITGVQLVTRDNNPQDVIRFVNFVAAQMIHLFIEMYISQLLMDGSGNIRYHIQSCQWYKISLKARKLLHLMTMRCNAPSKLTAGKICVMSVETYGVVVKTSMSYFTLLQSMQ

>IkuwOR56

MVFENINGETFFLHKRILKISGLWPLDRWRIGPLFILAISSTLKIMIAMSRMIMFDQGIISGATALSQLWALALQLSASLSVRINSDSIVRLIVSTTDSSMTDSSLTTSPKEREIMKRHQMFGRPFFVVVPIFFVSSVILHTITHFPSVGRAKLTIHQQTALNDHYTWLAVYEVLFTVATVYAVVEGMAVLMLLYSLTMHLSGQFKILRTKFQKFLRIKNKNKGSVTFRRLVDRHNQLLQLTNDLRNSFSTTLAASVLEYQITICFAAYELALALYNARLVESVCATMFVAFTLWLLFVLYNSGEYLVTCAREIGEVFQQCQWYNFSKDERTNISIVMLQSRTIKTMTAAGMCKMNHSNYKDIVKAVYSYVTLILAITKDE

>IkuwOR57

MLLGLWPMVSTYSTKSQYYLFTFLIIVNCLLMAVITLPCLSNMLFREMDPMIRLMLIGPITFYIASILKYSSIVYRRRSIRDCIEHLENDWTNIENENDWNIMIKNVQVGRNLTVLCGILLLPSTVCYRVILPLWTGKTIIEFNETVRIPVHYGFDVFVDAQKSPMYECIFYTCAVAALISSTVAVTSCNLVAMFVTHACGQFQIVVSRLENLIISVDDLDEEILKRRIKFIVYTHVRVLGFSSKIDEAVREISCVEVAASTLTLCLDEYYCMTEWNNSDPVAILTYAGAFIAFTFNIFLFCYIGELLKGQCDKIERAAYMSDWYKLRGTSGLAIVLIISTGLHPRKIEAGRIVELSFLTFGSIMKTTFAYLNMLRTIVF

>IkuwOR58

MKDNPKYVYAYGWNRFNMGVIGVWPEADENILLRYRAWAYSLLIFILIWVPQLASVTVFWGNINATIECLSINVPVGVSIMKLVVFRYRRKVLSDLLKLVEEDWAHPWTKEEEAIMTTLMKISRVISLISVYVTSSLLVAYVSSGILIGVQNWNNPDVDPRLSVGFLYSLILPYNTRNMYNFVSTWIAQLAGTWFSLVAYSGPDALIAMLVLHLCGQLAIVRLNIKNIVNEACLKDPRIFHQKLGAIVERHEELNRRNQMIEDSFNLMLLAQTLVCTIILCFQGFATLTTLMDLPEGEISYLNLTIFVLHSIFFAIYTIMHLFVYCWVGDLLITESSDIGISPYESQWYLMAPTEIKALMFVTHRSRTPLQITAGKFCS

>IkuwOR59

MTSVGAWPYQGKASRAFALFIFFIVGGSELYFEIAFVVLTGGTILVIVECATAIFIKFIGLIKVFNCLLKIKELRALLEQMASNNGCLLNSSESLIMQDYTEKGRKITIIWSSYVAMAVLTCIGLPVVPAILATGENATRRLPNPVYCHMDITDYYYPVLTHQVLASWFFCMGIAAADTIFVVCVQHACGMFTVLGYKVRNAIEEKDENVDMNIIKTNDLTYRNLIGCIDHHNKAIKFTELIESTHNKAFLFTVGINMVIVSVTGVRLITVSSETETPVILRQITTLIGVTTHLFIENYYGQQLLDHSIIAYAEILQCNWYRSSFRTKKLLNLFIMKSFIPSVVTIGGRYVMCMENFSEVLRLSASYFTILRSVQ

>IkuwOR60

MKSETLRLEKAIQFTRRSVYLAYSWPPPPNSTKWQNKKFNILWAMSFISSLALLAPLLASIYVFQGDTLIVTKSTIFVFAVSNFAIKMIVCRVHRKKIQVLISEMMDFVNLASPKERAILECYMDKCSGFHATITIMYYMTAACIICGPLILPQPFPTNAIYPFPVSSPLVKFAIYIHQGFVGFQCSTGLTLDFQSAVLLWYSGARLELLAKEAQMIENKREFRTFIKKHQHLLWYAGEVRTVIRYVSLTTAAMTGIATAFGLLQLISNQPLLVKLQFATVVISSGINLYTCAWPADNLTSVCRLVGAGIYSSPWFRMPAKLLKDYNFVLHMSQKPVVISIGGFIPVLSLQYYGSERNERVGRKPATETITGR

>IkuwOR61

MDLASASTATNPKNPLNKVYESDIERTMQYTRWFLQVLGLWPTISKNPTTAQKHVSKIARIVCFFALNFTLVPVGLDTILREKDPFVRFFRFIGPILASLSSICKYAFIVIRRKNIRLCMEHLESDWMTVEKEDERVIMRKNVNVGRRITVNACVVVYASCMFYVLLIPILKGTTINERNETVRPVLYPGYDFFVNPQKSPAYEIITFSIGATGLVRHTVTMTACNFAAMFVSHACGQIQIVMARLEGLFEELQDEQHNDTLQKRISAIVQCHVRGLRLSAKIDDVLREMCLIEVVTSTLIMCLFTYNMHTAWRNGQFLVIITNLFPLSSFVLNLFIFCYIGELLKEQYYEVGKSTYFIDWQKFPGKSGL

>IkuwOR62

METTRSYEPLEAFSLNLGIFTVCGHWSAGVKNRSLRYLYKVWGILAPGICTGAFFTLQFINMILVFGDLQKVMETCYLLVTYVGEMSKFACLRWHSKRVEILFEKLETPIFMPRRQEHFDFMKEAMGIVRRDSLLFLSTAISAVTFWSFYPLVDSAQGRKLAYVMWCPVDLNNTAIYVGTYSFQVVVVVYNTAINTMMDTTICGLMRMMSGHLDILSLDFSSLFDEHYIKPGSSSPRKNSINMSTRIRDNFFVKKNDSLDSMADLATVRSSTELTSEEIHSRLVACVKYYLAIEGFVKELNNIFEKGMLMQFAASCLIVCVTSFELTMAPVASIQFASIIQYQGCMILQIFIYCWRGNELTIKFSQLSD

>IkuwOR63

MSIGGMWPLQNQPSLFYLWLTFCILNLCLMLGDLIQVLGDLNCVITNLCATAPLIMITSKMLVLKYSTMLRKLMRQVELSENEIDFKNEEERRIYMSYNSIGLKFFRIVLWISLAATSVYYIKNLKINVNNEQLAESIKILLPYRIYIFHIIQNIRNYYIFYACECPMVYIATCHGIIACFVWSLIIDVCGQLSVLSFRIRNMQSNSPVNRLESVLRDIIQRHDKLIWNSKIIDGAFNLSLLVELVACTIIMALCMYNMIVNSNFSDATEFLSFLLYILMMFVVIYGYCFAGELLAQESLNVRDSCYECDWYNMPPRCKKMLIMCMIRTRTPLQMTGGGFYIYNIESLTSVLKTAMAYGSMLRHVA

>IkuwOR64

MSIGGMWPLQTQPSLFYFWLTFCILQVCLLLVDLVQVLDDLNCVITNLCATAPMITITSKMLVLKFSPMLRKFMRQVEMSENEIAYENEEERRIYMSYNSIGLKFFKIVLWITFAATAFYYIKNFKINVNDEQLAESIKTLLPYPICTFHIIKNIRNYYIVYACEGPMVYIATCHGILACFVWSLIIDVCGQLSVLSFRIRNMQTNSSVKRLESELRDIIKRHDKLMWNSKVIDGAFNISLLVELVGCTIILGLCMYNMIVNSDFSDATEFLSFFLYISMMLAVIYGYCLAGEFLAQESLNVRDSCYECDWYNMPPRCKKMLIICMIRTRTPLQMTGGGFYIYNIESLTSVIKTAMAYGSMLRHVA

>IkuwOR65

MSIGGLWPLQTEPTLFYFWITCCTLQTCLMLVDLVEGLSDLNCVINNFCALAPMITIMAKMLAVKYSPKLRKLMRQVEMSENEIDYKNEEERKIYMSYNCLGVKLFKIVLWITFAAVIFYYLKNFKINATNEELAESIKTLLPYPICTFDIIKNIRDYYFVYICESTMIYISTCQSIISCFVWSLIIDVCGQLSVLSFRIRNMQKNSSVNCLESVLCDIVKRHEKLIWNSRVIDGAFNLSLLVELVGCTIIIGLGMFSMIVNSSVSDATEFLSFLLYIMMMLAVIYGYCLAGELLAQESLNVRDSWYECDWYNMSPRCKKMLIICMIRSRVPLRLTGGGFYIYNIERLTGVLKTAMAYGSMLRTVA

>IkuwOR66

MLRLPAMLLPSKSNFMPPNDSLNRKLHLRCDTSSIPEGLPVYLLNMPSKTSSSEVTWNADIVHAFGLYKMVNQIIGIWPLNCHDLFSKARVLVITILQISMTANLFRELKSDCVTAEEVVTFLGLMGVSVIALVKIMVLRLNQQRMNLLIRTAVEDWSKVEDTEERSIMREHASTGRFVFIFQMSSAYATIVSMILGSLPFFNQEIMEGAMENNVYNYSNFSVSSPPPFLLTTSPRNSQRTLPMGTACFVADMPTVLYGLIYIVQVIQLMTTAAGNIGTDVYFFGVALHVCGQFELLKTSFKKFGQEPDIHKCRMELKQLVRRHNQLIILSNNFEETFNLLILAQLCLNSFYMSLLGILLSLINRC

>IkuwOR69

MVTFVWIPQVATLPIIRHDMNMTIDCLSTNLSITIAIVKLFVLQYQRSVVGTVVNSMAKDWQNIQTKDEWEAMMVTGRISSLNSKISFCVTTLSFSGVVVIQLFVILGSGEDPDRDPRLAYGFVMESYFPFNTSSPLIFVPLWLTQTFSTGLSAATYAAPDCFVSTLGLHLCGQLNIVRYLLRNLANDTTTQQPVEYWKRLCVIVRRHEHLNQRTYVMDKLFSTLLLAQMLICSVTFCCQGYAMFRRTVDLNGEALPIPVLVFRIFYAACTIEHLFVCCYVGERLSAESTSISDAFYETPWYDLAPKEARAFLLVCQRSNRPLELRAGKFCTFNLQLFNTIMKNSMGYISMLMAMKDRLID

>IkuwOR70

MDFYYSMGDFYKFAYALTNVMTLLMVLFKVTIFSLKRDKIIELIKYSKENFWDVEYDEFGTEVLEDCERQCVLFVFTFTVFAQGTVCSYTITPIIDNIGKNETDRNLIFDIWVDLPVTETPYFECLFFIETLSLYHVGILYFCFDNLLCILNVHVNGQFRILSHRLETSCDVRKEEKIYSDEKLCIDERHEDRIPDSSASLKNFKTCIRQHQALISFVDKMEGVYSLVILGQVIVFSALICLVAYQAFLVGGPFLRRVIFVVHCAGTFTQLFMFTLTCHNLWDGSSDVADAAYRSDWHLLENDSDSNSLRKDLILMIMRVKRPCCLTACGFFLISLETFMTINSTAVSYLTLLRQGAAM

>IkuwOR71

MLRHCKEVGVVVNFLKMCGRLTSTWPSDPGAPVLENLFGEILWFASFLNVLGLLFPLMLAAYHYRLELSAVMKSLSELTALSEVFFNLILCKIERPRLQKLLLEITDYVKNAKESERLILQKHVDRYFPFLMSVGGSYLLTAVVFSCGPLLITTSLPADAWYPFSIEPLFTKCGLYILQVLAILQTGLCITVDFMVGMMLWYTAARLEILCSKITNVVNETQLNTYIEEHQKLISFAEETANAVRYIILKGNVTMAIVVICGGFPLIRHEPLLVLSQFFLMVVGGLLRLYVSAWPADDLAEMSEHVGLTTYCSQWIDGSPQMRKTVLLVMQRSRKPLVISVVGILPALTLKFYASFVSS

>IkuwOR72

MFFVVILVLSLIPQATALFKVRGHLLLMIENMIISVLFCVSELELTILWNKNEVIATMMEYMKNDWLQPKTEQERDVMLSYGKATRILTIGGYLIIAVTIMFYHSPVFFGVALRTLSNLTDIGDRPFALQSYYFFYPYNSPVYELVVLSQLGICFVGTFCYTTVGTLFGAIVLHVSAQLENLYNRMENMAKGDDAENFEIEFRTNMDEHERLIRFSGMIESTFSLMLLGVIAGFTMMFCMQGYEIIEMLSDDIERPIIQIAVNIFYVIYATYLMFGFSAVGQTLVTQSEKIQYATYNCEWYNRSAQEAAQLIPVLVRSQRPLVITAGKFVSLNLAAFATLLKTTGGYISCLLAAKD

>IkuwOR73

MLAFFFVPHGYHIFLVEKDYTAKMKMIGAWSFCAMAILKYAIVLARRDGIKRCIDRIAMDWKNVDKSYHREIMLRNAKTCRVFTKLCVVFMFSGSMFHSTLLPVVTTTKSSGTSGIHNLSANKVLPFPSEFIMFDAKISPMYEIVFVGHTVSVAVLCTVASGVCTLAVKFVMHAYSQYQIVISLLECLEVDENLDSNNTEKQMNDILRRHLHVLTFVPKIETVLNEICLVELVGCTLNICFVGYHLIMKWEDSEPLGIITYIVLLTSFVSNIFIFCYIGELLTEQSKKVGLACYMIDWWYLPRGQARAVVMFIAASDFPIKFTAGKIINLSLQSFCSVIKASVTYLNVLRNSMV

>IkuwOR74

MNYNLIQEFVRGCVSIYHAVDFIGVLGTTSVSLLKISVLRMCHKKMGFILESAVNDWSMDHCEKSREIMRRHAVFGTFVSVFQFSSAAASAVLIVIVAPPTLEETPSDNVENGNLNITEYRNVPMGSGCSVVGMPIFLYLTFYVFQLCQLICLCFCSVGIDSIFFAIVMHLCAQFKLLNVDIARLGHHVDQRNNVRENFISNIERHKHLSRLAKLVEDIFHPIILGQLAASGLHITLLGIEILFGLRDGNYSILVYSAVTVSLLLLQLYIYCYAGDYLASQAKGIRDAAYSCSWYNFRPSFAKDIMFVVVRSNRLFHLTAGKMFRMNIQGFTTLLKTIMSFFSVLKLTIVG

>IkuwOR75

MGWVLYFMVHLSMAYADFVAVFGDLELMILNFMETGLQSMILVRLIVFRSSKILPRIIVAAKEDMRDDNYESEEEKEIYFHYYSSAVSFFKTVTSFACCTTVMYCIKPIQEYYASVLKNESSTLMPPYRVRAFFDLNEIRNVVLVYIFQIPIMCTAIFYVASIGLLVALVFNVCGQLSILSYRIINLNPGERDSAKSIFRKFVTRHLRVIWMAKSIENVFHMVLLNELVGTTIVLGLIAYNSLTTIDNAEGAALAVFGFYALTMMVLIYGNCLVGEHLNFESTRLRDAFYQCNWYEMPLSYRKALIICIVQAQIPLQLTAGGFYPFSLSSFTDIIKKSMAYMSMLRTVAVK

>IkuwOR76

MCFTMSCVVLNFCRDHLTNLDLLTKSIGIMGSYLSAVLKVICFLVNRKELMELHQTLEKYFDETFTCDPEVRIGIFDSLSIFIRPSFAITILVFIGTLVFFLTPLIVLFVQYSHDVHPLKYILPYPGKYPWIFEGGGFVYYVHYSWEILAGLYLFCVTSGVDSLFGYYVFQIHAIFRMMSHRMRNLSSDDEDYGATIRDCVYKHRMLGHCKDLFQKIYGPIVLWMFLTSAIIMCTLIFQASETPEMTIGYAILFTVYISMKLLQALMYAWYGGIVYTESEEFREAVYASGWPGSGDKTLMSNILIMMSHKPLVIVACKFLTVSTDMFANIVNATMSYFFLLQTLDEGN

>IkuwOR77

MVLCSILMAFIMIPSTLHMVCREKNPIVRLMLFGPIGFCLTNILKYCSIVFRSDSIKLCIEHVETDWMMIENEKDRQIMRKNVNVGRDLTALCGIFMYTGGLSYHTIMPLWCGSRINELNQTIRPLVYPGYDIFVDPQASPTYEIIFYTNCISACVTYTVTTAACNLAAIFVTHSCGQIQIMMSRLETLFDDVKENEVLNDVLKNRVGFVIRCHVRVLRFTSIVERVLREICLVEVVASTLIICLLEYYCMTEWNNSEAVAIITYFMLLISLSFNIFIFCHIGELLKEQCYQVGKATYMIDWYRLPSKTGLALVMIIAMANYPRKITAGRMMELSVTSFGAVFIRS

>IkuwOR78

MIMEFADLYDSFGDLELMILNLSESTLETMIILKLMVLRFSGTLKKLIIRVIDGVKSELYEGPEEKKIYLGYNRIAKIFFKACLTAGISTSVMYHMKPLETRLRAVVNGNESVPFVLPYRTRLFFDVEDWPTFWFVFVYQSPMIYIHLFHTVTIGVLFSFVLHVCGKLAVLAFRIRNLKVDPEANSRHTKRVFHDIVDNHLEIIWMAKAIDDTFCMLLLEELVTTTVILCLAAYNVLVNSDMADMTEFLSFLLYGSTMLLIVYGYCVAGEYLITESLNVHNAFYECQWYDMPNSFRKQLTICMATTNQPLYLTGGHFYIFSMAGFTSVVKTSMAYLSMLRTII

>IkuwOR79

MIDNLIASLLFIVIEFELITLWNKNEVISTMMEYMKNDWMQPRTQQERDVMLKYGKLSRIITIGGYLIIAVTVVCYHSPVIFGFVLRTLTNLTDIGDRPFVLQTSYPFDAYKSPVYELVVVSQLLICTFCGFCYTTVGTLFGVIVLHVSAQLENLYNRLEGTAKNNDTDNFQIEFKFNVEEHERLIRFSEMIENTFSLMLLEVVTGFTLMVCLQGYQIIVILRDDIQRPLIQVVFCITYMMYVIFITFVYSAVGDILVSQSEKIQYATYNCGWYKLKPQEAAQLIPILIRSQRPLVITAGKFISLTLPTFAKLLKTTAGYISCLLAMKD

>IkuwOR80

MLFGPLSFYIAHFLKLACIVFRCKTIKLCMDHVENDWMRIESENDREIMTSNVRVGRGLTILFGAFIYGSGMAYHAIMPLWSGSTINELNQTVRPLVYPGYDIFVESQMSPTYEIIFCTTCVSAFVVYTVTTAACNIAAIFVTHACGQIQIVMSRLESLVDGIDGNGNSRKIQGRISFIIKCHVRVLRLTSNIEVVLREICLVEVVASSMIICLQEYYCMTEWNKGETFAVMTYVIGLISLSFNIFIFCHIGELLQEKWHQIAKTTYMIEWYRLPGKTGLALVMVIAMANFPRKLTAGGMMELSVCSFGNVMKTSFAYLNMLRTIAE

>IkuwOR81

MSDNMLDRNNNNSRLLNKNVRYEIDVEYAIQINRWLFKPLGVWPLSHQAGGVERNFARFLIVVCSFLLGFILVPGSLYTFVKEKNAGVRVKLVGALSFCVMAIVKYGSLICSRRDIGQCIEHLVDDWRRVGNSGDRDIMLAHALFGRYGSVICAVFMYGGGLFYAGIMPLLRGSVVVAELNMTIRPLAYPSYYVIFDPQMKPAYRIVLSTHWCCAFVMHSIATAGCSMAVVFVMHACGQLEILVSWLNSLVDGNEKQLESLDTRIACVIDHHVRVLRFVSCVENILRTICLVEMAGCTLNLCLLGHYFLLVRFLVIIKVQIQI

>IkuwOR82

MKNVFTGESKNHRASNWEGVPFAVGIFHILFAASCEFRTVTRVWADDPDYAIEVFTPMLSAILIAVKGIRLWFWRHELYALLRGLAVMWEESHGRVEIRKKILASAEGTKRVGKYYGNMIIILVTNYALTPYIRLFQYYLYKNNMSEPYDYTVTVYPTTYPFATTTLTRYIICVTWEQFIFIFFVLYWMASDSLFAQLTTHTAIQYRILCHDLKNIAKSDDPTKSTNESERIRRLCVISQRHHYLYRCCRRIEKMFNPILFLMMLLTALNMCLCAFRLDKEVAQGNWSGVIKYLVHATTLIIQAVIYCGYAESLSRQML

>IkuwOR83

MLLARPSTAITPKAPLNHLYKSDIERSIQYSRWFLQILGVWPMISKNASTMEKYFSKIVMVACFIALNFTLIPVSLETILREKNAIKKLLHILGPITAALSSVFKYLFMIFRCKEIKLCLEHMKTDWMTVEKENERMIMMKNVNVGRRITVNASAIMYTTCTFYMTLLPIAKGTTINERNETIRPLPYPGYDFFVNPQKSPTYEILYFAVCATSLIRYTVTMTACNFAAMFVSHACGQIQIVMTRLDDLFDDLEEEHYGDTLQERISSIIICHVRGLRLTTTIDDVLREICLIELVASTLVMCYFIYNIQSV

>IkuwOR84

MWDEAHLRIRIRGENLKSAGDVSFVGKCYVTMVIILVTSYAVRPYILLLHHHWYEKHTNISYDYTETVYPTNYPFSTETMTAYIMCISWEQVVIVFVALYWMSSDTIFAQLTTHTAIQFRVLRHDLEFITAADENDITYKEKDLVDRLCIIARRHHDLYMYCEIIETIYNPIIFLTMLLTGANMCFCVFRVEKELSHGNWDEVIKYLFHAVTLVVQAVIYCGYADKLTQQSSLMAKAAYDCKWVQRSKEFKILLQIIMMRSQKPFNCTAYGFFSVNLNQITVIANTAASYFALLKTMT

>IkuwOR85

MKLHEILEATFRKDLENTELQPVLLSPLKYFYRPTIWLSVSTWAIVTIYFFTPPISISIQLARGVSPIKYRLPFPSQYPWAVEGNSILYPTQYFIEVCAGLGLAGITAATDALFGFYIFQMSSQFRTLSYRMNNLKSADNHLAVMKECAGRHRTLTLCRDYLERIYGPIILWMLMTSAMTMCANIFQASQISFDKAILVMVYIVMKLMQTLLYGWYGLFLTTESEVFRESVYCSGWAGSGDKSFMSNVLIMLMYKPLVLTACHFSVISLDIFMAVGILNISIKVLLIFLQT

>IkuwOR86

MEDFRKAAKPNELAVLQRYVDRCKSVHITITLINYLTPVLVLCGTLIKPDEILPAPAAYPFSVDSGLMLYLAYIHQCFAAFQCSAGATIDCQTAMLMWYVGARLEILAAELEKTRNPKTLHNLIERHQQLLGLAYEAKSTMSYIALTTTTTSGIATVCSCLQLVSNEPMVVKMQFGPVALISIACLFVCAWPADNIIAVCDSVGVAAYNSPWVGMPPKLRRHILMILRRSQRPVVASIGGFIPALSLRYYASFLSAAFSYFTTLSATMAADNQP

Supplementary Data S4. The amino acid sequences of gustatory receptors (GRs) from 11 Hymenoptera species.

>BdioGR43a1

MSDAIDQLITLHGTLCDSVDCVNRAYGTAILAGTISCLIHLIITPYFLYNRIYSRNPNNWLLLFSQMFWLLFHVYGMLLFVQPCHRVVVKSKKTGALVNEALTTNLNLE

VEKQLRIFSIQLLQRPIEFSACGLFYLNRDLMTSIAGSVTTYLVILVQFQ

>BdioGR43a2

MEAWGDVKEKRIARSKSQSSTTEAKAHQQTKSDVFYALTPIYHISKICGLLPVRFAPNKAGRYSGQLDYPQVGYGILLVLALAGAQCWGLYRDLRNGWQNSTRLSSE

TAITVTCSDVFAVISVTLVTILGSSSRWRHVQQGLNKLI

>BdioGR43a3

MDWSTVRAKEFPRRKSEITNADEKSHRAEFDILRNIMPIYHISKICGLLPVKFVLDKTGKYSGLVDYPQVGYGILLVLALTGAQCYGLYRDLRDGWQNSTRLSSESSITV

TVGDVFAVMSVAVVAILGSPHRWYYLQRALRKLVEVDEKLGIPTSSNLRKLSISVISITLIWLVIISILDFISWGVSATTENSDID

>BdioGR43a4

MEAWNNLKTSNRSKVHCFAFIFKYLLEVFAEKSSTQKNQNIKPPESKSHHARSELLRALAPISYLSKICGLLPVKFTLDKDDKFIGQVDSKRVGYGILLALTLAGLQCYG

MHRDLRDGWQNSTRLFSKTLIMVTSCDVFFVVSVTSFSILSSTYRWHHMRKALDKIVEADEKLDVATSPHLRKLSIAMMICTLIYLIIISIVDFVTWGLIVASKGSPVTAD

KGPINYSPLYFMYIVIVCLQMQYAVVLFNLGERFAKLNKVIENLTRTNSIVEYFRSDMGLAAQERRRQISFGSSELTQARPGRANRSMGSTIASEGVIYGNAASETIDQLI

NVHDTLCDSITHVNSAYGVILMMCTLSCLLHLVITLYFLYIEVNAETQRWYIFTRQTFWTIFHLWKMMLFVQPPYSVASKARNTGSLVSQALANNWNPAVQKQLEKF

TLQILHRPVEFTACGMFYLDRGLITSIAGAVTTYLVILVQFQNDEDTPTKELLQNATKLLRNVSGIEGS

>BdioGR43a5

MEIWDFASLIFWLAVKITILYFMCIIPEEISEKENKAKIIFSKIINVLNIQEAQQYNELKVFLLELFQREPGVSVYGLFELNSKSFYHVRFTKYLKLLLRIINKTGNYNFKYTF

LRLLQQLRCM

>BdioGR28b1

MTMLKCNIFGFKSFLILLHYFFVLNGLSTFSITQRKNTATFKLKQRYLFKKSSFSIFYNILLICMSGYVCYVGVYAVYYKVYKTKLFLFQIVDLSHAVFGTVVTASVLLSFCL

QADSLVSLVAKTYNTYTIFVYLDVIHYKKSIVYYVTSVFIIHIISYTLFMISGFFLFRNSFIFLIGFIPNFMITCLNMQHMFIVRVLFSMYKNLNEVIKKNASLIISTNQYQKF

MNVLSVTHKTNVFNLSSFQDLHKNLCDISHDISEFYNFPLLGSVLYIFVSLVVYNYFLLNLILERKTPFGIVEYVHCIMWDLMFVSSAFLLTRNVTNAVNEVNEH

>BdioGR28b2

MEELAREMQFTYTIYVEPGKNNGNCESTKVHDDYICKCTGMMEKIRTYEVDMAITDLTQTESRARCVQFSTSFMNLGITILAKKPQKVPSWYSFLTPFDYKVWLYVG

LSMILIPMLMVALARLCPTEWTNPYPCIDEPEELH

>BdioGR28b3

MEIPHLETRWDFRLKREGCLVNLYPHPATLSKAYVDLVTSLGWKGFTIIYENNEGLVRLQELLKAHGPTEFPITIRQLGEESNIGHGYRPLLKQIKNSAESHIILDCSTDKI

YTVLKQAQEIGMMTDYHSYFITSLDLHTVNLNEFKHGGTNITAFRIVNPDRTQETVQDWIFGEQRYFRKLEIEHNEKNYTFIKTETALMYDAVYLFARALHVLDASQ

QIEIRTLSCESSDTWDHGYSLINYMKNVEMDGLTGAIKFDNQGFRSDFELDIIELNTKDGLKKIGNWNSTKGINFTRSYGEVYTQIVDSLHNKTFIVTTILSAPYCMWK

ESSKKLSGNSQFEGYSVDLIQEIARILKFNYTIRLVPDGRYGSYNKELKEWDGMIKELLDQKADLAIADLTITYDREQAVDFTMPFMNLGISILYRKPVKQPPNLFSFLSP

LSLDVWIYMATAYLGVSVLLFILARFSPYEWENSHMMNNQTSGIENEYTLLNSLWFTIGSLMQQGSDIAPRAISTRMVAGMWWFFTLIMISSYTANLAAFLTVERMDS

PIESAEDLAKQTKIKYGALKGGSTAAFFRDSNFSTYQRMWHFMETAKPPNDVFTKSNVEGVERVVKGKGSYAFLMESTSIEYVIERNCELTQIGGLLDSKGYGIAMPP

NSPYRTAISGAILKLQEEGKLHVLKTKWWKEKHGGGACRDETSKSSSTASELGLANVGGVFVVLMGGMGIACVIAVCEFLWKSRKIAVEERRQRSSEKPMCIGFTDLR

>BdioGR64f1

MHRVDELDDDCNLQQITVCDEVMTMDGNYANNRNDTKRHSPGFGSRMLAIFGSSTSYGKTTRIFKSPKLSKVNAVQPRAAAMQNRRFSPSDDDPECFHRAISRILL

LAQFFGLLPIKGIRAHSVRRFTFKRFSPRAIYSYCTLFAIGVMTSISVLHLFRTLDAKSFSTKGGIADATAGAIFYGNSLLGNIMFLRLCPRWISIQYDWRAMERLLDNNA

GIAKCKRPALRWRFNLIAGIILSLALIEHILSMINNTPMEVFGRNHTLEDFLVVYTNKSHRFIVKNVDYNFTLGLFIFLVSKISTFTWNFTDLFIMVVSTGLAERYKCLNQ

RVTKVLPAQLSATDWQEFRQSYAALSALVKKVDHEISGIILLSFGNNIYFICLQLLNGLTPEGSGNQFINSLYFFGSFIFLIGRTTAVTLLCARINDECKVILPILYNCPSMNYNLEAQRLQQQIATDDVALTGHRFFSITRNFMLAVAGAIVTYEVVLLQFNVALQRDI

>BdioGR1

MRLWDQYAELSRISRAVSNFYSFSILLVIIVEITTQMSIMYTVFRPVILGGQFLNTSQLVNGFFFYLVSSIPIIMLTIAVTNMISEVRKFQHSNTND

>BdioGR2

MSCIATANALTWYYRITEGFQLKFKHIVGTIMAHCAGVCTINAFSILRKKQIFILNNINQIRINLNEDCNSRESCISRKVKLIVFLHMGIWLGYAISAMFFDFYTNLANLI

FNINFFILNAVVLQYCIVIIFIKYLFFKLNHNLLYLLRNIYTNDASPFVTGFDKDLVHLWNKYTKLRKISRTVAKFYSFNILFVIIETLFELISVTYTVTIPMIFGGQRLKIAQY

VNLIFFLLAIVTPLILLTTEIANTKNEVNFSL

>BdioGR3

MTCMILANGLVWYYRIRFTPYFSLKSHPGNAVSTTAAICYILSTFCIKREKQIFILNSMIQIKDNLDKKGNSTKQNTDVNLKIMLFVYWCVWFGLTISLFFFDVFKALTIF

VFNMNHFIISAVALQYFVVVTFIQDLFIKLNENLLLTLKHTCTHNTFVLIFKTNDDISLLWNQYGELCKVSRVISNFYSSSILLVIIEIFSNAISAAYFIIKSTFREDQPLNIIRY

SNDICFVLALIIPLILLTRSIDNAVDEVRKFCIIIYINILLIW

>BdioGR4

MTGAINTTGVVEQLEDKQDKYLKYLFYCFKVCGIAPYNLNIEKVQNVNITKWMFAYSQRSIIYNIIVMSALIVMSSTVLYFYATSKLYEKIMYFAVDALGLLNALFIVGM

SSMKCQTQINMWNKINGMRKSLYLEHRSYEKNNIVPRKIKIIFLVHLLPWLVWTLSKFSSNDNSIVIYFICDIGHTISTIMIMQYCFTVVLIKNLFIKLNENLIYDLKLTSHI

IQERSVTKTYNDLSRLWNQYVELSKLYNDVSNYYSSNISLITINAIIMVPAAAIYYVIAKPIICTKTDITFFDITLAIFFALTYVCPCVLLTTSVCTAVNEVGSIFCLKSDVEFIE

NLFTLEICIFLRVKKHVKLFGTI

>BdioGR5

MIIHYCVVVEFIKYLFIHLNENLNCSLRHARCLRGDLSAAETNNDLLRISRLWDHYFDLSKLSGKVSNFYSLNLSLITINAIMVPASAIYYVIAKPLVCKDTYTTAFDLAV

AISFAFSYVCAYMHLTVSVCTAINESKRTREIIWNHLRKSHAPVIVEKLTQFSNYLLQENVQFSVFYVFSLNGSLLVSVGIITIKIEYICDKFIFVVFSYFYRW

>BdioGR6

MMRRVEKIIQNLKVDDMFLKWLIYFFKICGIATVDFSTEGCSNRTDRKKWTFTYSHKNIAINSIIMAFMFACSGFTVYVYKISGFYTRLIHFIGDMFEFFAATMVIGIFIIRS

NKETVILNEISNIREKLKDESCRYDERDVFKKTKFILFMHISLWMALTVSILFLSPYQILLYLIINTGSFVSCTILVQYSIIIEFIKHLIVQLNENLSHTLKDANASYSWSSVVKI

NNEFTRLWKIHMDIRNISRDVSSFYSVCILLNISSLLLLSFATLYYDF

>BdioGR7

MYAVELFFLPALLTPLILVTTSASSTLNESKRTREIVNDQLRKTESQIIKDKLTSFSMYLLHDNIKFRVFDLFSLNNSFLLTITGTVATYLFIVL

>BdioGR8

MIEPILLQGKYSSASTYINQVFFLLVTLSPLVFLTASVNATVGESQRTSEIVNDQLRNPLSRVIKDKLHQFSVYLLYDNMQFRVYDLFKLNGSLLVSFTGSVATYLFIVLQF

QD

>BdioGR9 MVKNVVQKYFHNIFLLLVRETKSCRTMSLTKRLENLKNNDSVWFNFLVYYFKIFGLAPVSFRVQKEEHSRRRRWIFAHSRMSIIFSYFVMSLLITWNALMFFKYMKKV

YVQDTIINTSANIFEILCSLCIIMIFCLRKTSGIMVFNKFNGVTELIPFNNQVNSLPKIVIVVFFMNTLIFIGIASTLFFYDFISSMIYSGTLLCHMVLNAMMLQYFVVLKLIE

HLFNVINNNLLAIVSDSNALWEPVTVVEINTKILNLWKAHSKLCVLSRDMSKLYSLPALLVTATEFLSMTVFAYFLAKPFFIDGKYLSGNDYVNWILFTLINLLLFVHLT

LSVSAAINESKKTRVIVNDLLQKPQMQVVKNKVR

>BdioGR10

MVENKLYELWNSYVNLCVLSKDVSHFYSLPTLLNIMYKILSATVSVYFIAKPLVLETIHSPIFYYIHESFYVLACLIYTIFFTMCITATINESRRTRKIVYDFLRMPQTPIMKA

MLSNFSTYLDCDNVKFAVFNLFNLDGTLLISIAGSITTYLVIVLQFQS

>BdioGR11

MTRRWKTFKNSLSCQKSSSHNYLFYYFRACGIFPINVEVRTNVNVRRWAFTCSTSGIFYNLFLLGCISICNFLTFYNYAHHVYGNGRIIFKIADLFQIFSSIFMIIVFSIQQK

REVNLFNQICNIKEALNIGNWNYKPSTLRKKVSYIIFANACITLGLIFTTFIYDFQRKLLYNSLNLCIISRNAITLQYCVVLMGLHNLFHTLNKKLVLILESSALFYALPSSI

ARKRLHDLWESYTNLCELSKNVSHFYSIPMLLNIIYTITTATASVYYIAKPLMLGGSSKRTFHYIHEIFFGVTYLLPLILLTTCVISAVNEVNIIGFYVL

>BdioGR12

MIRILKNTGNMESISSRCLFYYFKLCGVAPVNLNIQTINQGKIDRWTFTYNWVGTLYNLFLTCLIIMCNYSSFLLYYTIDKYNFSFETTVYIIVNVIYVINTACIVLVFCVKR

SATSILFNRLNYMREIIRNSDGWMGNSKVLFKKILTLSVINASIWVVLITTIFLYDDIELLLSLIFCILVQNALTMQYCINLKLIEDLFSIINRN

>BdioGR13

MIKIAKNHRFMESLHLKCLFYYFKVCGLAPVNLNVNAIDNTKVVRWSFVRAWIGIVYNLLLICCIVVWNYFSFYRSYFKNNTIFTFDRTVYIVVDLYSIFNTLCIILIFSFR

QKQLLTLFNKLNDMRETIKFSSDSSYESKRLFHKIMTLLVINIPIWVILIVTIATFDYESALMFSGLGFCIFVRNAMTLQYCMNLKLIEHLLYVLNRNLSTLSVCFSSPHNIE

NIDTVDNKVSQLWEWYSLMCKLTRNISDFYSFPMLLNIQCEFLMTITVNYYILKPIVFGISSSMNYLDYMNSLCFVLTHMCPIILLTTSVSKVINEVRYLFVYSPVCMISIF

FVNLLCTLQSQRTREIVNDYVKEPKARIVKERVNLMI

>BdioGR14

MLDLSTMKNITRKLKFTETIHLKILYYYFRLCGVAPLNVDIQAINSAKANRWTFTRSWKDTLYSLFLLTLIIAWCSTNLNDNYYKQKHLGFDNSVYAVVDTCATINTLCI

VLIFCIQQNKVLAIFSRVNNITEIIKRNNNSTSEHDTLLYKIMILLIINVLSWVFLITTIAMFEYEDVISLAASTFCTFIRNALALQYCISIILISDLLKTLNENLSDLSKYFSLM

PEVTSINRIEINNKFSELWEWYSLINKLSEDIAYFYSLPMLLNIFCDLLMTITIIYYATKPLIFENSDLDVLDYVNSVAFSFIHICPTILLTTSATTAIEKGRRTHELVNNYLKEP

ETQIIKDKLLHFSIYLLHHEIKFIFVGWFIASFGRYLK

>BdioGR15

MLSKESVFAKYLYYYFKIFGIMPVSLNVAHKKNDDSLFKHSKVGIVYNMLLTFFLILKSYFGLKYVDLAFYMHIKSPFEKTFDDLLNILSLLTVVFIFVKFSFSQRKIAN

>BdioGR16

MSKQPEIIYQIEQFFWVSCHIYVLIILTTWASATVDESRKTRLIINGYLKKRTSKTIEKQLKRFSTSVSYDNVRFKVFELFDLDGSLLMSIVGSVTTYLVIIIQFEMSTH

>BdioGR17 MGKKISYFKNVIDIETLRGICIFYYFKFCGLATMRLKINKSQKIKFEDCSLHESIWGCCYNVIIAVCVVCSSYYGMTHRGKFFEKESHFEEVYYLIIDVIITASVVIILMYFCF

ERAKANDILHRILRVEKLSKIIKGNTDDGKLWRNMRIIITLHLLIWLGIYVSTAFLDRSLYLYE

>BdioGR18

MNESNSLKRLYKLYRGAVVFYYFKICGLATMSYSYENSKKGRCWVMRESIWGRFYNVAMIGVLITMSYFGMKDYTSYNKRYSNFKLIASEVKDLLIAINAIAVLLFFSIK

QKELNDIIREVYDIEQKLTLFMGNRNKNKNNLRRAIGIIFLIHTLIFIGRLSLFCEWYPSLLLHSCVLCAYLTILDSVALKYSILLLLIRRHFKLTNDELSTALTISNRPNSIQI

VTVNDVKHYRELSKLFDIHSRLCKISCKISSYYSMPALFYILYKFSYLTASFYNLLVHVVWNPSNRFDSFDFRVNKMLNSIFPIFYLVVLTKCVTDITIEVHIFKSYIIFILYFC

RKWRILIMSF

>BdioGR19

MQSFSISALKNRQKIKKRRFMMTQDREPIKTVKKEKIMLLNWLFYYFKVSGVAPINFEFKLMNCGKLKRWVFTTNRKNLYYNVLLIFGVGVANYYSLLLILDPSYRYD

KHYFYMQAISMLCTIFILVTICIQQNKLPAILNGIVETKEAILNSCLSSVPDKLFQEIMLIFSMSSILWLATNVTLCLYPYGLFSFQSLLLSTSDAIQSALALQYIVALKFFKYL

LKIINDRFISQSNNAMIADRMSSVSLAKTELEIHNFLRLRNSFSSMCKISQELSDYYSFLLLFFLVAKFVIFTIQLYFIVELILNQEVLIAIIAFFICTFYILDCAFFMVLLAASV

SQIANERGKTCEIINIYLEHSRSPKMKEKV

>BdioGR20

MMLLSTTKECIFVNFIYDFFKIAGVVPFKLHINVNENKKIQKLIFQHSRTGIIYNLLLVILALVTNFIGFRVSLERYDFGRRSKFERIIDTIHEIFATFPCCYILITICLQQNKVI

KLDEQVLDKTSSVSCGILKIISINFITWILVLVTSRSEKIFEIIIYYIGLYFCSSIINHIILVYSVLWIIVKQLFNIMNQNFIKLAEKLSLPRGIEIIE

>BdioGR21

MIPTAIMWCKFGFRITNMYICDAIITGTMLQYSLLLILVRLLFKSVNNKFGKIGSHQEVECILVKCMRTVDIVNLRNKYSSIRDVCEQIERFYSMPMLLASSYVFISLIVYS

YGTLAPFFSGDNQLETKNVLYYVSRIIHGLTALCILTSTVSAVVDESGRTGKVVNTMIWKSTDDQEITKLSQFTDFLLHQNLRFTAAGLFPIDGTLVMSIIASITTYLVILIN

MQE

>BdioGR22

MLTRRVSAVVHESKRTTNIVNDYLLMVASDDVKNKLGEFSTYLLHTGIKFSAFDLFPLDGSLMISVRMEYFFVKLIML

>BdioGR23

MTLFYVVTYVCEIIVNGAIFQYSITLNLIKRLFVTNNDHLGDIAFLRNLAKDRFLRLHKQHCVLIDICEDLNRFYSIPVLSSISHIFLTLVLSSYYICKPFLYHKINLNIALLL

HCLAAIIHD

>BdioGR24

MAKHSTPPCIKFIFHLFKIFGVAPISFDSNFRFSPSKIGIAYNVSLIILVLINTYFAVNASYFSNFAARVQLEKISDTLHTLILIFTALFILIIYSVRQKEIANIANELRRLIDVSST

LCCKKTYDEKS

>BdioGR25

MNFTIYLFYHFKIFGIATISYRISYKNKTVHRLYFNRSKTDILYNIFLAIVLLVMNYFSIKFFYEFDVKQGLENFDRLFIRLVDVLNLSSAVFISFIYCTRQERVVIIANKIDRIREILFANNNSSNSLKCINYITKVFVINNAMWCLLLFTTTLYGIQYFPYFFGQLSSKLTITALVVQYTAILKILEEFYEIINNDLSKVATKCAFTTLNDTQDKVSRILQLREVHS

QLQ

>BdioGR26

MKSINDLVVKMDNQYYDYYGKIRRSLKIIFCIKGLIWFPIIATIDMTQLDISLSYVYIQACNLTILCAMLQYSITLNVLRHILGAVNTNFLNITK

>BdioGR27

MIHFDFFIIIFRSENITAEAQKTGQMIREIDDPRKNIIDEIHQFSMQMMHHPLNFTASGLYVLNFNFVQAVRIIIGFIPNSTIYLRLFFSSLLDQSHFT

>BdioGR28

MNWIAFRDASEAITLTIIFDVPLLINPMVEVNFSIAVSTLGKRFERLNALVQSVTDTPPASISPRDAQKYENILNSDQKKVAVQPISHQQNRSNLELLLKVTRQLHLDLC

GISRKVNDTCSKQMSMQMAATFLLLTGFSYSLYLLYNEPNIPLQNKIQHYVSLAVWILTSIFRMIQVVRISVNVTTEAQKTSQIAHEIQVPRSKNKLIDEIHQLSLQIMQH

PLYFTASGLIVLDFGYVRGFVGSVTTYLMILIQNQPDMIKAANTLVEGATDNGTISTTTTKST

>BdioGR29

MFLIFILSSCVNYRFEELNRFLKNIIPDLTNFLEFSFQNPISDIRKLNSQIVNPTHGNYVRTIEGVRQIHLQLKKLCQHASRMYGLQILMSILVAFTVLIGDMYMLYVTLVE

VHVTRDVIFKSITAAVIWGSYYIVKMMKFSSVCSYCVYQSVKTGDIINKLYDHTDPETQNEIREFNVQLIQSPLKFTAYGFFDLNYTLIQGMISSITTYLMILIQLDKLPLVT

VLKRNSVKILNNRTVNSN

>BdioGR30

MAINCNYIAYIMINIILISWFCDSLSKESMVTGYLISELYDEPYINENTK

>BdioGR31

MEKSYSKEIRKVALPIFASNWIFGIGIIEYPLGRPRRIFSCIYISTLLGIYTFASIYSFPYLKEFGLRMAANSIITKSFFGSHVFLVLSSILLGWHRTEVGIVIEIIIDFMYVFLELTG

ICIM

>BdioGR32

MAKAGNASQKCILPVFALNWIFGMGIIEYPAGNQRKTISIIYTALCFIVYASLAAYAYPYIIQMTREFEANQNVIRAIFFFPILLTIFTIFSGWVRNQGMHSILHQTECVDA

LLEKMSAVPRCTKVFRINWYDHVKSFILVFSVMSANVLMAILNDKHVKFQQIIALFVINHPIFIMFIVDSTFINTVKCAHRKFVILNSLLNNMLTCTTDCPQHMKIIQR

HFRSDGNLNEKMDNITLDNPANIIQTAKMIHSTLARVCQTADETFGLHNLLSIISSIIAITASLYHIYVLILYTHIPKADLYRILINTAIWLVYCFIKTYIITSCCSAIAEESKTS

GDIISKIYDEDYINSEAQLQIKDFCYQLTESSVTFTARGFVTIDFTMIHWIIGSVTTYLMISSQFGNFMAPT

>BdioGR33

MSEVHHRRRQVRRSVFGGRGSESPLYELVSPVLYVVRVFGLAPYAYPRGNRPPRLQASRAYCLYSLLWAGIYSWIVVTTMMRFGGLDRDKPVLGVTENGKLILNYLTSL

AELALTVGHREQFVHVWNGIQDFDESFQLGYELPRPPMLRRTRTCVWLSLAVSALAWTAINQLGMQAFGEPYVQNVSYMLTYVGTYVATLKFVGLVALLGQRFAYL

NRLLAQRRLARDPQADALAKAEEKTEDRNVVQQAAGHEREAERAVLVLALPVPAQPLLPRGQQHVLLHHLDDRRPELPQGLQRRAVSVYLAAGLPAAAAPPPRL

LPLYQPRGQPHGKRAAGLAKTHRAPEQTTRFQVDSALFEQETQVHRGRLLRRQHARSHHDLWTSHHLPSHSTADTRQRLLARLSAYSYHPSHVLVNVVNKIVPK

>BdioGR34

MVSLKDIKPLLYAARFFGCGPHVVSERDVLLSPVGLVYSGLWALGFVCSCGYGLYLIARGRESEPKIVALAAGRTLLAYVCFFSDGIVSVRRNERLRAALLQLRSFDAAV

GYGIARPSTWRHSCASWMAVATVFLFWLGVGYITYKCDMTSPLFNAIIYVVANAAISMQLIKFAGLLILLHQRFRYLRILLQPEGGIALTTGMAR

>BdioGR35

MSQLNKKMYYSNKLFLVWHEKKNSFIRYHLLVRKVGEQAGISISLGNSDLKSFAGGIALATGMARVRKGISSAVQRQEMQLQDIRWLHCTLSNAADTVNSMYSMQL

LFWLATMWLNCLSRIYAISENLAGTIGILPKIRESLLVTAYIVNMLIITTACHFTAHEANTIGKAVFKPQSALARKRHSFEQTVEIGTYFNLRELHFSAAGGFIYVDLPLLL

SIAGTMTTYLVVLHNNT

>BdioGR36

MDALGLLFQYCSVVCSWLTVIFRHDKLKSILCEFDNAKELAKALSVTLYENEFKTLLYIILRLSTINILYLAIFLTDHYSLSLYKKFQEQASVWVWFNVPKIVLYNVGAFF

LELMLILKQNFRVINKVLIHSFSSKTTEFRSFSTTSNPIQKLQKIGQLYESSSDLLETVTHFFSLSILLSIIATFIHSFLDIYTVYQYVTNKRTWEVGDFGTYSLNIIWMTTKFLT

LYFICGVPDSTCTEANKIIFNFDLLINNYCHMKESRDAMQKLTLQFHQKRTRVSVYGLVSLDYHLFKNIMGTIIMFLVFMFQLDDLVD

>BdioGR37

MERKKMLLRWLPLLMLLNIVDGDDAGFGYGGGGSGTSPGGIQRTGSTIKIGKTDRSSGQSTGRGSSIIKIGEGNKFLNSTRVVRPVLTTSMTSTSIPLAYASVQPDASSEF

TNGTKMLKVGLAVPYKSFGYREYTKAVSRVVTALQKSTKRPNLGLFQHYDIFVKVAMQELTPSPMNILNSLCKEFLSLNVSAILYLMNYEQYGRSTASTQYFLQLAGY

LGIPVIAWNADNSGLERRASQSSLHLQLAPSIEHQAAAMLSILERYKWHQFSVVTSQIAGHDDFVQAVRERIGDMQERFKFTMLNAVTVTKSQDLKDLVNVESRVML

LYSTKEEANNIFRAAAEFKITGENYVWVVTQSVIQNIQPGHHFPVGMIGVHFDTSSTSIVNEIATAIKVYAYGVEDFVNDRRNYGYSLNTQLSCEDLSSESRWSTGEYFF

KYLKNVSVEAEHYGKPPVEFTQDGVLKSAELKIMNLRPGPSMQLVWEEIGTWKSWEKDGLDIKDIVWPGNTHTPPPGVPEKFHVKITFLEEPPYINLAPPDPVTGKC

LVERGVHCRVAPKDPDPEAEIQAQGGRNGTAFQCCSGFCIDLLQKFSEEMGFTYELVRVEDGKWGTLENGKWNGLMAELVNRKTDMVMTSLKINSEREAVVDFTV

PFMETGSAIVVAKRTGIISPTAFLASSPSSPPSTSSSPPSPLPKRSRPRTSPAAPQVAEAPPFFPLSRLLARLGGALPGGRARRLAARIYSKVHDERLGDVRRCVLGHLHGQ

FGGFYDHARGVFRLHGSGRS

>BdioGR38

MHSMRKPKWGKKTSSMTFDEYKQRQFQLQVMNIQAGRETVVGEWNGKELVIDRNEKEMNNTLTEAAQNKIFKVTTRVGAPYIMLAEGETKGRQIGDKKYHGYCI

DLISKIEEFLKIKCEFDIVADGEYGSLNPQTHQWSGLVKQLLELKADFAICDLTITSERQSAVDFTAPFMNLGISILFSKPSKEVPKLFAFMDPLSTEVWMYMATAYLIVSL

MLFFQARIAPGEWVNPHPCNPNPDELENNFTLMNSMWLTMGSLMQQGSDILPRTPSIRMVAGIWWFFVLIMVSSYTANLAAFLTAVKMEDSINDVEDLAKQTKISY

GAVKGGSTYSFFKNSNTSLYQRIFNSMTDTKPSVFTSDNDEGVDRVKKGKRKYAFFMESTTIEYQIERHCELQMVGTLLDNKGYGIAMPPNSPYRTMISTAILHLQEKG

DLQQLKQKWWKEMGGGKCNDDSDEPTNSNELGMPHVGGVFLVLMLGCVISTMIAVMEFLWNIRKVAIDEKITLLEAFIKEIKFVINIWAVTKPVKIEKSSKSASSQNR

SSSKSESVSISPAHSLHRTDMTYAVNTNQIH

>BdioGR39

MYDSVQVFAVGLRTLEQSHALRPMNISCELEHPWDGGLSLINYINTVDRKGISGPIGFKEGRRIQFKLDLLKLRQQSLVKVGEWRPGSGVNITDKSAFFEPGATNVTLVVITILETPYVMLRSKGNFSGNDRYEGFCIDLLKEIAHMVGFAYRIELVPDGKYGVYDYETGEWNGIVRQLMDKKADLAVGSMTINYARESVIDFTKPFMNLGISILFKV

PTSHPARLFSFMNPLAIEIWLYVLAAYILVSVTMFVVARFSPYEWNNPHPCHSQNSDVVENQFSLANSFWFTIGTLMQQGSDLNPKATSTRIVSGVWWFFTLIIISSYTA

NLAAFLTVERMITPIENAEDLASQTDISYGTLESGSTMTFFRDSMIETYKKMWRFMENRKPSVFVPTYEEGIQRVLQGNYAFLMESTMLDYIVQRDCNLTQIGGLLDSK

GYGIATPMGSPWRDKISLAILELQEKGEIQILYDKWWKSPSDTCMKNDKDKGSKANALGVDNIGGIFVVLLCGLTFAVLIAIFEFCYNSKRSVPVERVSIYIDRLNGIDC

CRYRESMLFAWL

>BdioGR40

MVSTYTANLAAFLTIEKPVKLLNGIDDLFNQDKIKFGAKINGSTYSYFKSSAKYYPLYEKMSDPEWQKEYMVAENEDGVQMVKRNDTDYVFFMESSSIDYEVKRNCE

LEKVGDLIDHKIYGIAYAKSENEKKKLIFLYRIS

>CvesGR1

MLSPKGSYSNTRRSVDYKSACRKVWPFLVTEDNNMSNSRDDRALHHYTVNRSVPVKNFLA

PEVSGKRNTPDENNESFHKAIGSILAVAQFFGVLPLYGIRAPSSQKLSFKLNSLKTFYSI

SLMIALIFMAVISIIHMVRTLNSDAFQIHGGIAAATAGAVFYGNSLFGLGLFMWLSPRWI

SLQQQWKSMELQLDRCKQSRPRLRWKFRAITITIMTLALIEHVLSILVNLPDNREPESSN

NTWKDSLRIYSQKSHAFILSSLNYNVALGIFLFTISKIATFTWNFTDVFVMLVSTGLAER

YKSLNKYLLKTSSIKNSTIDWGEFRENYATLSSLVKRTDSNMSPVILLSFVNNLYFICLQ

LLNGLSTEDMSMLNTVYFFFSFAFLLSRTIAVTLFTARINDQSKVALPILYNSTAANYTV

EMQRLQFQLTTDEVALTGLKFFYITRNFMLAVAGAIVTYEVVLLQFNVAMKK

>CvesGR2

MNKVTKSDLYQGLFPIYHLSKVLGLLPVRFVRQRSDRYLGSIYIIDIVYGICLLVLFSVA

EAWGLWRDLRDGWENSTRLKHQTALNITIGDVTAVALLAAAGVLGAPFRWKHIREIMARL

IHADERLGYITPKKTQRFAIILSISTMVFLIILASLDIYSWDLQTKMKRKMPDKGPINYS

PLYFFYLQALFTEIQYTIATYNLYERFIRLNKNLEHLLKNSKTYLRKDIDLVSELSDKDK

FPMTILKSEASGGSNKHDRRLFRTPKISGWTAEERESRDVMDTVIQLITIHASLCDVNKL

INKAFGLPMLIVALTALFHLIITPYFLLMEASSDRETFFIIVQCLWCILHVYRIVVVVQP

CYATTNESQKTAVLASQLLTYSWQPEIRKQLEIFSLQILHRPLHFTACGLFSLDRALVTS

MASAVTTYLVILLQFQKADDTKDSTNVLRNATLLLKNVSSTGIKLIT

>CvesGR3

MIRPADKSGQLALVVAEIKQKGQPSEPAFDTWNLPKKKSEKMRNSDCLHVALRPVITLAQ

CFGLFPVNGIRAPDTSGLQFTWRSLKILYCVLALFMSMSMTICSFIRIISTKFHTTKMTT LVFSVSSCLTNIIFLKLARKWPEFAASWEKVEQEIKVRYRQPPKYSLIKRFKIVTVIIIT

LAFCEHALSLASGYISARECADLYDNSDVTAVYFKTQFPQVFTKTSYALWKGIVVQFTQV

LTTFSWNFMDLFLILICTALTHHFHQLNERLYNVKNKTMPEWWWAEARSDYNDLANLTRQ

VDSYVADVVLLSFGTDLYFICIQLMFSFDRMTSLMRTIYLCYSFGFLLGRTTAVSLTAAS

VHDESLLPAPILYGVHASSYSTEVVRFLTQVTTDNIGLTGMKFFSITRSFVLTVAGTIVT

YELVLVQFNNVQQTSHLNMTNVCEVK

>CvesGR4

MYQNAYKKYNQNLIISKFYFFKILGLSPWSLNLSAVLPKNRHLKITLCKFSNIGSLYNIF

LTIFVTTSGFYAFHHRSLIQGEHDALLTVSTVRLMEYFAILKSSVVFLIYTLRQKKMISM

INGINNVDYRLEKYGWNISGDDVIINMIFVINLFLCVFIVALEWYILSFSEALMRCFPTT

LFCWFLVQYTIIVDVINKRFKFINLCIAKLGSLKENSELPQRVFITKLSFLHESVIFNVI

NLKRAYNNLCEICRVVADFYGLMFLGIILHNGAVTIFILYFTLLRFFKSKDIVFIKLISH

GVCVLWMMFQIVVFTTYVDKTINQSKKTANIINAVIRQNRMDDKVEKELLKFLRDLSFRK

IKFTAYEIISLDRSILATLAGTVATYLIILIQFRVSAPPESLTSTQYNPTTMASTHTKEY

IDENMEYAHKI

>CvesGR5

MIMPYGTVQEAAFERQQKLFYKRENSYKDSFNSLRNKLKFYSLLLVFKVLGLLPWKVNVN

KILAAQNQKNNHENLFEVSKFGYFYNILLIIIMTTYCATLITLGLDKDGYVDSDLVNKSE

VILMLYGTLVLVVIWLNHILQMKKIVNIVNGLFNINHNLKSCNKYTFKSDCRLYTIFIIN

FFLTSSSLVPQFLINDPYSAVMWIALPVISSWVLIQYSLVLEIILQLFKLINEIILQLGE

INIENYYRTSLRSKILLRESIIEDIIRVDCAIMELCDICDQIADFYAIPTLMIILYLIAM

TTFNAYYIFVMRILLHELESLKFRVIICVIICVMFLTAAYNLVVFTSNVTRITREFSKTS

RYISMLTKRCTMNSTTKEALLDCSRDISQRNIIFSAYGVITLDTSLLQMISGAMVTYLII

LVQFHK

>CvesGR6

MLFIRLMSIQMISRVIMWKPKNFLQALLPIYILNFLFCHGAVEFLNVDKSKTKYLFLYTV

ITLVIHLSSYMYVLFNYFDPHWASGYLISYFINTNITFFVMIINIVVGWAFKTKSAMINT

RLIEADVMLHTLGVPLNFKKEFFFSIKIAVFWIVYLLFINISMVSIYREYDLFLRTFVAI

VIQHAYYVNLIIDLSFYLLINHMKVRFKNINKILIDILQLQSNNSMHKEETDYKWAISRK ISFEKDFTEIIRKLKDIHLELGILCRELMKVYGIPIVFTMIRAFTNTTSFLFLIFVILKD

QKMIMPDKILFLSNFTIWLIVFICKVISINYICAGTINEWQETGSTIHKLECNSKDSNFQ

GEIQKFSIQMLQNPLKFSPCGFFDLGYYFLRDFFGSVSTQIFLLIQTYPIHNSATKQ

>CvesGR7

MKDVSSNNLSNKMFNNNRKSFLGSYKIIQHISSKIIGLAPWTLKVSSTFSDREQIPNRNI

TYSSSHVGTVYNIILFLGIASFGIYRMIANALSQRFNDSLLVITVYQLLFVTLINASFIP

LIYVIRQKIMIKAINNLKTVDFLLNQCADYTLESDYTNDVIYAFNMLMNFGLITVDLFNS

EVVSVLFESIPSIISSGVIIQYAIQLNKMNRRFSSINSAFSKLEDHNLKSGLNYVPSVTQ

VVQSRALIIHAIEITKKAYIELCEMCEMITDFYGIPILIAIFSFSVRALFTVYISILSIV

QIHLSTMVQWYLLAIRIIFAIFLFTTLTCSVTTITKQNKRLALTINHQTDQPEIDEKVEK

SLLKFASDLRHLKIEVTACNIIPLDRTLLAIVTGTIATYLVIGVQFALSSRPTKNN

>CvesGR8

MELINLKLKNKFFCDQYRSGYNRYFIFVQHIFYKIIGLSPWSLDMSNVILKKPPNDNDQI

IVCKLSYLGSCYNLLLFLFISSTNFYILYNSTSPYFLYDSILTPTVRAKLKFIAVLCITF

IPLIYICRQKLMIGVINRLKNVDIKLRNCQSYKARRRNCYTHFIFIMNFLSFISHIVIVF

FYFSKSSVIVHLIILFPDVISSWMIIQFTILLQKIFNRFKSINFAISKLDIRNKFNTSDK

NVSLLTESAIFEIRTIKFAFIELCEICQDSVDFYGLPILISIIHYMVISIIRLYFVILTL

LQKKEPNNMIYVCAGIVNVSIIFLLLVLTSIVTKTTKESNKTGKVINLLMDQCSIDQKIE

KQLAKFSSDILHLKIEFTAYDVIPLDRRLLAMIVGTVATYLVIVIQFNFGTASN

>CvesGR9

MELLNLKEKFNLYQYNLVCRRYFIIIQYVFYKLIGLSPWVVDTSEILSKSLNHIGEINLC

EISYFGSYYNLCIFSFIGLSNIYFELNSSLPHAQSDSILTPAFRARLKFIAILCINFIPL

IYVCRQKILITVINRLKTTDQKLKKCANYLSNKNNKHIYFIFMVKFLCSATSTSILLHHS

NFSFVTLLLRIYPDLIGGWVMIQFSTLLKVINKRFKSINTTITKLDNIVNDRNQIKVLSE

KEVSFTHETEIIKHAYVELCEVCDNVVDFYGLPLLISIIHYLTINIIRLYFIILSVLSIA

SYDRVIYICNGINFSLASFIFLTLTSSVTATMKESKKTLKVISLLVNRCPVDSKIEKQLT

KFSSDISHFQVEFTACDVIPLDRRLLLMIVGTIASYLVIVVQFRINSPSN

>CvesGR10

MQKKLFCQRANAQKSYFKLSCERISIYVSLFVFKVLGLFPWKFNVDTILKDENQDNNKKN LLEIWKYGYLYNILMIIVSPTFCAMTINLGLWQENYVESNLVDKIEVSLMSYGVFLLVVV

WVNYIWQQRNFVNNSNNLYSIYKNFEIYHRHIENYCYLFIIFVVHFFLCLFILFTGFFAN

DAFSGLLWFVPFFTSSWILMQYLIILDVIFQLFKRINHIILQLGNINLENYYRAALPSII

PLREFAIKDIVCVNHATMQLCDICDQVADFYAIPMLLIIIYFITTTTFNGYYGIVSLLFQ

KVSGLATTYWIIGAWFFLVAFDLVVFTLHIIKITREFSKIPHHICLLLHRCSMNLTTKEI

VLDFLRDISHRNVNFTAYGVITLNGFLLQTIFGTMVTYLIILVQFHN

>CvesGR11

MQQNMMHKRVNSHQYIFDSLNRCMTIQGLLFVFKVLGLSPWKVNKYKISDKNKDNQRNLV

ESSNYGCVYNILLIIILSAICATVIELGLWKEEYMESDLVNKIDLCLMIYGISLIVIVWL

NYVLLQKKIVNIVNKLYSIYDNLMICNRYNFKSDYRLYIFPLLNFFLCGSLVIIDMVKSG

IYITIMWSTPLIISSWVLMQYTLLLNIIFQLLKCMSMKILELGDIDMENYYRTVLRSKIS

LREFAIKDINFLKYAIMQLCEICDQIADFYAIPLLMIVVYSITRAIFDIYYLIVSLFLLD

ESDLIKIYFFVGILCLIISFNLIVFTSNITRITREFSKIPQYVSLLLNRCAMNSTTKEAL

LDFLRDTSNRDINFTTYGIITLNGTLLQTIFGTMVTYLIILVQFRN

>CvesGR12

MYQNLYSSIHYRNLVIAQHIFFKILGLSPWALNFPEKLPKNRDGKIKFCKFSYLGSIYNI

LLVTLAISFATFAFYQRYTVLPQTDALMTNSTLTTIQLLSLLQMSFIFTIYTVRQERMIS

ALNKIFNVDLILQKYTYSKNYNSWKSDNVIINLFFILSLLISIFFLSVGLYLPSFLITLL

RVTPWVLFFWVIAHYTILLDTVNKRLKLINSHIMDLGPAEVDLEKSRPLFFIKPSILYES

VLQDVIKIKDTYKELCEVCEDIACFYGELVLVVILCIGGGVTVVSYFIILSFFKQVEILP

VMFVNDTVFISWATLQFIVFTSYVSLVLKESERTPIIINSLMSQCVVHDKVEKELLNFLR

ELAFRKIKFTACEIIPIDRSFLATAAGTVATYLIILIQFRMSTPSE

>CvesGR13

MKLNHLNEFNEVPTSIHHYSAYKLRFICFSNIWFKILGLSPWTIDTRMLRKNVSAEDKNF

KSKLSFWGTFYNVLLVIFMLITDIWIIYSLSLLENSTLTLETVTVKLSFVSIICASIIPI

IYVFRQKLLVNMNNRFEGVNRILSDCSDYSADDSNKNYLIFTVTSLLTIIIIILRVLYYL

SSAKVFVISLPYFISSWLIVQFVMFLNMIKVRITSVNNTLSQLGTSDNKILLSRESVLSD

IFIIKRIYVEICEISDGIMSFFGLPILIVIIVFSIRSIFNLYYIILILIHIQEIDLRLYE

YGFFLLRNVFLFLMMTSSATEIIKQNRKTARIINLLIDRYLLDKKIKNKLIKFANELWHL TLNFNACDIIPLDRTLLAALTGTVATYLVIAVQFRISAIPKPAS

>CvesGR14

MYQSVYGSVHQRNLIYTQYIFFKILGLAPWKINIVTKPSKNRIAKTTVCKFSYLGLLYNV

LLTTSVFLMTSYFCHQHNSVDAQVDSLVTPSTMMNLQYFAAIISSSVFLNYTCRQKDMIG

IINEIIKVDRKLQKYAFNSAKNGNIIINLIFLGHLIACSTLLCLEYSFLQSFWLSLLRCW

PAFLYCWVIVQYTIMLDMMEKRFKFINLNILKLGEIKVSSEESEPLFTTKLSFLRESVLY

DVINIKDNYNKLCDICDDFSDFYGLSFLKVIMYHGTSTILILYFMLVAYYESKEFHLVLF

IKNVGFVLWMAFQIIIFTTYVNKTINKSEETPNIINTLMSRCAMHEKVEKELVNFLRELS

FRKVKFTAWGIISIDRSLLATIAGTVATYLIILIQFRTSTPN

>CvesGR15

MIVRNTKIYKRSKIQNTSCYRYYKFLQHMPCKVLGLSPWKIDSNNFWSVSYIGSFYNIQL

SFGLIAFSIIEHLYSKARIYLALAALMVSVVHQSLLFTALSASFIPLFYTIYQRSLIRIN

NRLAKVDGILTKCADYKLKRDYTNEVIFIANLLVIVFLIVIFDACYYDVQHILYGNFPTI

IGGSVMIQFAMLLNRIEKRISSINSTVSKIGTAEDNIIGTQILSLSKKVIMRESLIYNID

NFKCAFNELHEICFDSAYFYGVPILIALFCGSVRVFFTIYLALLTVLKLSKQTVVWHVVG

ARLLWIVSTIIILTSSVTTIQKQHRKLANTITRIVDRKTLNDKVSKKLSDFSNDLRFLEI

ELSACDVIPIGRSLLGVITGTISMYIIIATQLALIQSS

>CvesGR16

MHIRSKIILKLLFYYFKILGFMPYVYCKSGILKRSKSATIYTLILTLGYTKNVMNVMLSR

SSFIRPRETILAVIVDFVSLMLDYIAISMIWIYSITRFNQVQGILKLFLNTLESTSVIMK

IKMTKMYDDILREMFVFVLSLNTLFVITVTTDLIVCYGEIKDFDFPVWTIFNYPRIITLN

YAIVHIYFVKILERQFCLLNKSIGYLPEVFADEDSSMEVVKKRLKPREIDEKLREFDKLD

LDLRNQIKMSNEIFALPLITVLLLQFTHSIFNSYLFMNSLLKKSFSWPILINVSWVLMRM

SLLLFFVDNCHTVCEEANKKVKILHESWAFKRLDGFKEMLKSISLHQLQEPVEIKFHDAL

KLNHELFYKMAGVTTTYLIIMIQLDQQVQHSHDHRI

>CvesGR17

MNYRKIKSVSYRIFVISQYLFFKLIGLSPWSIDASKIITSNGRIESHNFKYSFSYIGVCY

NIIFIVVASSLNIYYFYYITSNRIIDQIMDTFPTAFAFISSFCIVFIVLFITTRQKLFIN

FINNHLQNVDKTLNTCADYDLKYDSTNDITFISNFIFICVIVLSKHFFSKLKLIVFINLP HFLMTWPLIHYAIFINMIKLRFKSMNSMLSKLGTTESKISRSRVLILDNLDSIKRAYAEI

CKGSDEIVTFYGVPTLIVLIIFSAKTVRSLYFVMIPLISSPKIGTVTYFTGLTLLYPIYV

FIFFTSSVTQVVKENKETVRIINSLRDRFDMDEEIFEKLLKFSSHLSYLTVEFTCCGIIP

LNRTLLVIVFSTIATYLVISVQFYISLSAN

>CvesGR18

MDWSSVLNITTDSPEASPTVNYFSESNTTSKIPNKTIGNLTLECKTELSDGALFEFITNG

ILLNLVGVFGLFGNIISMIILSRPQMKSSINYLLIGLARCDTILIITAVLIHGLPAIYSY

TGLLFDYKFKTYPHIVRYLYPLSCMAQMVTVYLTLTVTIERYVAVCHPLKARSFCTYGRA

RLAVLCIVIVSTLYNLPKFWEVNLEEEIHWRYNVTIYCVGPAILRSNDLYISIYVNWMYF

FFYYAFPFVLLVVFNVAIYRRVRKANRDLQQLSRHQRREINLATMLLCVVIVFIVCNVLP

LVSNVFEMFQVPPVWLVQAGNLLVTINSSINFIVYVIFGRNFKRLFIRLFCSSRFFRAGR

DSPEFQTNDESVVTNMTNIELKNSIRRNHLQRSNTTVVRANNLHTNGSSRRQSVKILTTR

ASNPGPCVYYPAPASSSPVANQHQGSRSNVQNGWSPKNNSEHALN

>CvesGR19

MKNTRNNSDFYRSYKFLQRISCKALGLSPWGVSSKQNNLYNVSYVGTYYNILLIFVLIVL

GVCEVFSGSLSDDYPGKLMPLIMVEVLFITILCASLIPLLYIIRQRKLINIYNRLKFVDK

LLKKCENHKLKYDYTNDVIFIVNLLTTVWLIIILQLCYAEAHRVFFENIPTVIGGGVMIQ

YAMLLNAVENRFRSINLIISKFSLIKSNHDYPQIFSVTQKVLKRESVLYNIDNIKAAYVE

LYEMCHDAADFYGVPILITILCFAERVIYCVYLCVLTILKVQGFHVPWLLMILRLIWIVF

IFLAFTSSVTTIKKQNCKLAKTITLLTDKNTMDEKIMKKLSFFSSDLFHLEINLTACDIL

PLDRTLLAITTGTIAMYLVIAVQFGSSSISH

>CvesGR20

METLLPLFILDCVFCHGVMPYKSVKKLKINHSLLYSVISLILYLILLIFILLKFPTQHES

KMLDGAIKIMRGIYTIIMITNIIISWIFRNRATKLVTHILKADETLKSLGITMNIQKQFC

FVLKVAVSWIVYNVLTCPVVILYDFINLDLITKTVVIVLVYHGFFVNLLIILKFFLLIKH

MRLRFENVNKVLENVLRSHTKNMTQERTNDGWTTSVRKNLGLDFIRNVRRIHLELGILCR

ETTTVYGTPLAFTTIGLFANIIGSLYCQSIRVLSPDLEIPYKIRSIVITLICMVPCSLMF

VSVNYICKDTINEWRKTGIILDKLELKYKETEIQTEIRNFSAQVQRNTLKFSPGGFFDLD

FYFVRDFAAAVATYLVIMLQTYPSKN

>CvesGR21

MISHRPRNLIKESWSSLCMTGIVGLRPIELCKTKLFGYIYVIGVLILYYTLIYFTRDEAD

KVYEYLDKTTIYVAKIRRIEYYVSAVVLSLMLITSAFKFNLGITGVYSYLNEIDKKLKLL

NQKLNYDKNMRDNILNITGIVIFTILIGLTDYSTIKNAASNITMFNLMWFGNQFPQIVNS

IATATFVTIIASCCTRQQIINDLIFKLRNIDKESYNTDVISQEMHNGLKLKLLRKIFEIL

SNTVIIINEAYGFMLILTFITHFIGISAHLYIVYMTFGEQNYTVDLIVEFLWACFYFGKL

IYIISACHSFEREGKRASKLLHECRIDSDHNLLKQETESFARQVRNVDIKITASNLFTVD

YPALWKIVLGQTAYVFFLSQFTSAK

>CvesGR22

MKLVCHRLSEIWQYYFFKLIGLSPCSIDSLKIICGKRTVQNKNYKCCFSYIGIFYNFILI

AVTAVYNTWYIFYFLPTRSDFAQLKKFIVPMAAFAFLGIILVELAYTIRGKLLINFIDRL

RIVDQHLDTCADYNVGCDNTNDWIFFVNLVFASIITIMFQFLEKDLHLKIFICIPVFLTT

WPLIHFTMFINMVKLRFEGINCALSKLGTSKSKLLRTRELVLNNIACIERAYVEICKACD

DIVSFYGFPLLIVILIVSVRFVRLIYTVILNFISSIYYPVGNFSIVLLSQATIISIVLTT

EVTNVIKQNKKTLQVINLLRDRFDMDEEIFKKLLKFSSYLPYLTVEFTCCGIIPLDRSFL

AIATSAIMTYLVVAVQFYIDTSTN

>CvesGR23

MMLIFIFRQRSLISIIHQIKLVTKKIGQCDNFKKELDCTIYLTLMTDCLIISSIMIVEIC

YNFSVTMIVQFILECFFEGGMIIQFVIFLNIITKHFEAINSSISDVDNVKINTAQVHPSY

VINMAVSVPEPDLQIIDSDSVNAYVDLYKICDSLKKFYGLPILIDILNLSVKTLCMLYFT

IWNSIRYMQEDAREIMQMVFMSLRNIFLLIVLTSNVTKTINQSHETTKIINLLMLRPSAN

QEIKKQLIQFSSIISHFKVKFTACDMVPLDQTLLVNICSTITAYLVIIILIRINLSPYIN

>CvesGR24

MRHNYLNSVYFKITIFIKHIYFKLMGLSPWSLNTTKDNSKKQNYVIICVFSYLGSIYNIF

LALGIASLTIIKLYKNFDPIYKDSLMSLSFLASYHLVSMIGISFVILYYTIQQKKLIIVF

SEISKLDKLSYKCGFSSIKNRKFIINLIFSIDVIVRVVLILIEWYRSSLWRSLSNCCTMV

FFGCIVTQYIIILEMIDERFKLINSNIIKLCNKEVESIIPEPSFIALPSQLRRSVLVDVI

SIRKAYNKLCNICNKTADFYGVPLLITLIYNSILLMNALYFGIISYFGMNDPLPIEERIR

GVIVMWFSTQFVILTSYASKIINQSEETPIIVNALMSRCTFDGKIEREVNLFLVNKIAIN YPFY

>CvesGR25

MLSQVHSQTRRPLTQRILTQMRRLKKTQYSGSNSPLYASICPIVYAARMFGLAPYEFKDN

KLVPSDTYVSFTFFWFIVYTYFIWGYLEGFTSSKQNKKATLTYTESAKTVSNYIVAITDL

IVCMVTRKQIAWIWNKIQDYDQAMRDLGYARTEKKARMLAWFIIGFNIVLWALINNLGMT

AFNESFLYNASYLIVYVGAATAVTKFSGLVLILGQRFKQLNEIAKTNVYKTRWIHADPII

DDKLVDCFHSELTTIGKELNYLYRWSLILWLGNLSFHSVCCSYFVMDWVLQGNIYPDLIN

CLLAWFASTVTQLFLIDYSCHYTSSEVSNLDLEEKNYANCSTSHHFQVKNSQISKYL

>CvesGR26

MAIAHKIKHRNTMLSQVHRQTERPLTQRIFSHIRRTKEKESRGSNSPLYKSICPLIYAVR

IFGLAPYEFEDNKLVPSDSYLSFAFFWFCVYTYVIWRYLVGVLDPSTDMKTTLYHTEFTK

TVGNYFVTVMDFIVCISTRKEISWIWNKIEDFDQAMRDLGYARNEKKTRVVVWFIIGYNI

IIWGIINNLGMAAFHETFFYNVTYLIVYVGAAVAVTKFSGLILILGQRFKQLNEIAKSHA

YKSRWIHADPIIDDKLVDCLHSELTAVGIKLNNIYKFSLIIWLGNLSFHSISSSYFVINW

VMEGKFQMHFINCLLGWFVAIFSQLFFLNYSCHYTSSEVSNLSFIFKKKQQ

>CvesGR27

MIFNIILGWIHRNKNYIINLKTIKIEETISAIGESIDNQRAFRYSLAVSICWIITLVLLN

YNKVAWFNMNIPLIHKIVIIFVTQHPYYINLLVDLIFCLSINHIKIRFKSLNKVLKSFVS

EDNFKNRITSDNLFSTGSRKTSEDNWAIRKSENVDVIKIIQTIKYLHLELGILSGEFMKT

YGLQIILGIIASFGLITHVLLFVYFVVQTKSQSTEDKIIQTVGSIVTVAINSFKMIFVNK

ICSETILEYQKTGELIHKLEIQTEDIKLKKEIQRFSIQILQNPLIFSPCGLLNLSYPFIK

DFAGSVTAQLLILIQTSDENTVLYSSYNETAVNDA

>CvesGR28

MNVTTDFRVIQDHDHGYQQAYPRAVTLTAAVCAILFSIVGVLGNLVTVIALMKYTRLRRH

ATTAFVISLSISDLIFSTVNLPLTASRYLNEAWVLGETLCQIFPLFFYGNVAVSLLSMVA

ITVNRYVLISKSDIYARLYTNRGITIMLIAIWVVSFSLLLPPLTGIWGRLGLDSRTFSCT

ILQKNGKSPKKMLFVIGFVIPCVVIIVSYLCIYWKVRQSRKNLEAHMVNGGMRRNTGFQR

REDSRVTKLMLTIFLCFLLCFLPLMLVNVVDDKVKIPILHVVASILAWASSVINPFIYAG

TNKLYREAYRQVLCPITSSKSNVPVKPTGSHSSKISSHQIT

>CvesGR29

MSVTEILISITWFVETISVSWIQSFYVYKQKTMIKVINRLNYVDRTLNIGVDSYAKKISS

YFIFMLNFLFVSAKIISAIPIGAAPIIVIVYENFPTVMYSWIIVQYTILLGIVEEQFKAL

NSSIKTSNFNQISTSIARLSLIEESAFQEIDHLENLYIELHDICEEINNFYGLPILMSIV

CLNNDLINLISVFILEDSIPSETLEFVFYLAQAIFVLWVIPLTLLLTFVVSKTIDQSQET

GQLIILLSEQCSMNPQVNERLSKFSRDLLFFKVKFSAWDTLPLDRDLLGIVCGTVATFVV

IMVA

>CvesGR30

MVFIKVHLVIFYFLGLIPFSYKKNTNVVDKKKFGPDTITLVPTEIHTCYSLVLIIIIVIG

NSIQIPLFLKERYSGDGNELTETLGLAISVSGNVVMVIMLLLYIVQRQKIIKLGNQLLDL

DVAMKKLHNIYKLESEKMELILICYINTIPCVIITLLTLLIEASFIRATCMYTFHTTVFN

YFVIQYAIVLTLIEKKLKCCNDAFLRMKKSIELQFRVYNTQKNTLEKTSIVEIFALKRCH

TILCKMCSDIADFYSFGFLFIIPYSIVCVILNIYDLLTPFLKIYPTDDVVVRRIGNIAWI

TARLFPILTTAICATKVSKQVSCKIYFSSITLRMLGM

>CvesGR31

MNVSMNINIIVSWFYKTKILMINTRIIEADTTLDKLGVPVHSQKEYCFSKKILFLWIVHL

IFINSVRIIWCSYPLDLQSIILIVFVLQHAYHVNFLIDLIFFVTIKHMKVRFNNVNELLS

DTYKQQINFTSISLADRKWAITRQLKYNTSSADILQSIKRIHLELGLLCDELVKIFQVPI

VLTMITSFVVFVGLLMRLYLNIIDSKTSVNSKVAAMIVIITWFSIYAIKIIAMNYICEET

VKEWKKTGEIVHKIEIETKNPELRNELQKFSIQLIKNPLKFTPCGLFDLSYYFVRDFAGS

VTAYLVLLIQTYSYDS

>CvesGR32

MLRKNYRSNNLNESLTPVLILNLIFGHQIMPHTMDGYKFIQTFFYFILVIIIYGATMGYS

IFSIVTAEWFKYSESVYFAVLVTNLLIMPVNFILGWVHRNELLLINIKSLNVDKKLGKMG

VILDQKVCNFATKIVIYWLVCCVTINFAAMLWTMKALSWYKNFSMVFSLQHPVHVNFLVD

LLFCSLIRNMQVRFKKINEELIKLEYNSHVTNTRVDDNKPAYILQLSKEIHLELEQQCGK

ITRVFGIQLIMSMASLFILMTTMTYNLYVTVFGPNIQDWALRISVIAFWITIHCSKLLFI

NHICSKTVRE

>CvesGR33 MIVLIWILFVLFLDISHIVATEKSDDSSEKIVRSIILQHGHHVNALINTIFCLFVKHMKI

RFKSLNKVLLDIFQLQDNDSKHKKSTEYKWAVSRRINFEKDFIKILHDVKRIHLELGILC

REITKIYGIPIVLSMITAFISISSLILVTFIIIMIPSNPNFDKFVTASNLLLWVAVFSFR

IFIINYNCAECVLEWKKTGEIIHKLEFDSKDEKFQKEIEQFSIQILQNPLKFSPCGLFDL

GYYCIRDFAGAVTAQVILSIQTYRFTPK

>CvesGR34

MILILNQLKDVDERLQKCAFFKIDNSNTIHVIFITNLVISLIFIIIYSFYHKIYVVPVLL

FPILITNWIIFQYSMLLDTITKRFKSINLTLAKLGDIKNYENSTNTLSVTKISLLRGSLF

YDIVNLKLAYIKLCEISQSVSDFLGLTILHGIVYVGQASTIILYSAILVYLEIDHIDFLA

MIDLFSVVWMNIAIFVLTNYVTKTINESTETPIIVNYLIDRCTMDERVEKELDYFLYELS

SQKVEFTAFGIIPLDRSLLATMTGTCVTYLIICIQFRSK

>CvesGR35

MTLTNSFYGLNVACAKIIPSVINSGVLIQYAMLLNKINKRFEGINSIFLKLDYTKINSTQ

ISTITQIVPLRVLILKDINNVKCTYKKLIEACEDTSNFFGAPVLITLISMIGEGLVSTYL

GVLVFINIPSTFIVSWHLIAVRMSWTMFLFIVLTSWITTITEQNSKLAKILTLLTDQSTL

DNKISRNLNKFLNDLWNLKIKITAYDIIPLDRKLLAIVTNLLTTYLIIGVQFVFNVPNTR

SSS

>CvesGR36

MVLNKINKRFEGINLIFLKLDITKINSTQISTITQIVPLRVLVLKDIINIKYAYGKLIEA

CEDISNFYGAPVLISFISLVGKGLVSLYLGILLLMNMNKVTSPWYKYVIRISWIELLFII

LTSKISTITEQNEKLAKILISLTDRSILDDKISRNLDKFLNDLWNLKIKITACNIIPLDR

KLLAIVSNLITTYLVVGVQFLFNVSE

>CvesGR37

MFVYSTTILVLKLLDQNHVESAMVKIIDKILLMSGIFIVLFVWLIYVLQKKTIVTILNRL

YDVNYSLKKCRKYTLESDSFVYITGFCNFALCFSIAILEIIVDSKYTAIMWAIPFIVGTS

VFAQYTILLSIIVQFFKSINKTILKIGNLSSKNEIKVSFVTKILYEDSLIKDIYNINFDF

INLCEISNQIADFYAIPILVLTIYFVPTTTYNLYFMILSFIVSDDKSTIALYFDCGILIF

CIFLSYAALTTNVTRITREVKYLYNLFHHHFGK

>CvesGR38 MRLRFKNINKVLKTFLKSHSKNMTQEGTNDRWATSVQKNLGLDFIRNLRRIHLTLGILCR

KTTTVYGTQLVFTIIGFFVSIVSSLYCIYFRLMKMNFDTCEIMLFIGISMFWLVPFSLSF

LSVNNICKETVNEWRQTGVILDELELESKDTEIQIEIRNFSAQVQRNDLKFSPCGFFDLD

FYFVRDLTGAVATYLVIMLQTYPSKN

>CvesGR39

MYLNAYSSVHQRNLFFGQFIFFKVLGLSPWTLNFSAKASKARNTKFTVYKFSYFGTFYNI

SLATIAISFILYAYHQHNVNQIDSLVTRSITTNLEYLGLIVISLFLVIYTFRQKKIIKIF

NEMNSIDQALQRYAFYSSENGNVIISLIFTFNILICVALVTLGCNLPHPFFKTCLRCGAT

IFYCWVMMQYTMLLDMIQKRFKFINSNIIKLGKIEEDSKLSPAFFLQRLPAQRRSALHDV

INIRHTYHKLCEICEDVSEFY

>CvesGR40

MCKILGAPNQNNNQESLAEVSKYGFLYNILLIIIVPAYLATNQILALAKHGKNNSDLVKT

VDVFLQTYGILVIVGIWLNYVMQQKKIVNIVNGLWRINNNLMGCNRYSCKSECRLYIIPL

INFFLCCCQSGFHILVFGIHRAPLWITPFIISSWVLIECTLLLNIIFQLFESIDAKILDL

GDINDINEENFYQTINLKAFLRESDIKDINCINSSIMQLCEIFDQIGDFYAIPTLLIIIY

FITSTTFALYVTIVKFS

>CvesGR41

MIQYAMVVNKLNKRFDIINTIFLKLNSFKVNATPQVFSVTQVASSRRLVINDIDNLKYAF

LELYEMCQYTADFYGMSVLISILCYAERIIFCVYLSLLPALELGNFETIWQVTAPRLIWI

VFVFLMFTASITTIKKQTSHLAKNITTLRDRCMTDDKIVEKLSQFSIDLLHLKVEFTAYD

IMPLDRTLLAIVTGTITMYLIIAIQFADS

>CvesGR42

MPFVINSYIIMQFTMLLDAIYKRFEMINFAISNLDVNKKVSSVPDRLCATNSSPSHQLII

YEIGSIKCAYKELCEICLEINNFYGLIMVFIILITGTISVIILYFEFFALSGEIEFNIYN

VTDAIWLLWIAYDFVVLTVFVSSTEQESQKTANVINIRKDQFNIDEIVENKLFNFSLDLL

HRRVQFIACGIFPLNRKLLQTIVGTVVTYLIIMVQFHPDVVKQKP

>CvesGR43

MLIRHMCLRFRKINKALRKFIALQSNDLIFIENNESITENRIVLSQTSKRLNHSLQTLKN

IHLELTSLCEKITQIFGVQLIMTIVSSFVLITSLSYDLYLTARDPEVMNSDKIFESFILS SWMIVNVINFQFINYIAARTVHEWSQTGRIIHNLKSKSQDTDLCLTIQKFSLQMLQNPLK

FSPCGFIDLGFPFVRDFFGTITTYLIILIQMAPNTLNK

>CvesGR44

MSIRMVRSLYIAIVKIIYSSAIDGRIAIVGLSLLQYVFNFVMFTTAVTKVIKQNKNTSRI

LNLLRDRFDMDEKIFKKVLKFSSHLPFLTVDFTCWGIFPLDRTFLTLVSTLLT

>CvesGR45

MVKTSKRIFVFDLKSCVFLSVSQCLWPRAPIYQVLHQFLSTH

>CvesGR46

MIRKFIHITGYLYQEVAILRNRATIVPAKIPYTLTFLSWLLPSIYTLISINYACEKTIQE

WKQTREILARLELESKDPKLQEEIRNFSSQTQRNFLKFSPCGLFDLGSYFIRDFAAAVIA

YLIISIQNF

>CvesGR47

MASLFCCRLLCPLHVYWHTWQSHHNHRTLPYKEDEKRHRCIHNESFNLGSDVLLLQFTIS

NIYILVWLVDAWTTVVSSISFIALWSRCCKSVYGIGNHDQSIRNDWTSSTVSKVITKYFF

LSLVLLLTSNIIHNS

>CvesGR48

MVHNGILVTLVSYFLLVFFIGMIKLDLISCITYGVIIVWVAFQTTVLTSFVTKTIFQIEK

TANVINKLIRQCAMDEKVEKELLNFRCELAFQKVKFTAWGIFSLDRSFLASVSLINL

>NvitGR64f

MRSYHIEPAKTTDQAVQLPVWTITKRSLANTSELRSSKIDSSPKRGRYESLKMDSLPADVSRPSASNSGA

NLVESTRSFHCALRPIIILAQCFAVFPVSGVRSPDATHLKFTWRSFKILYCCLSTLGSIVLMFFSVYRLA

TTTISSNKTIGKLAGNLVFSLTAGITTLLFLKLARQWPSFAVSWENMERELATRHNPRRSSGINLATKFKILSVVVMVFALVEHTLSILSGYVSAVECASLRGDKDIMATYFAL

QFPQMFTDSNYTLWKGLIVQFVNFLSTFSWNFMDLFLILVSVALTDQFRQLNQRLYSIRGKHCFNVKAMPEWWWAEARIDFNRLATMTRRVDSQISDIVLLSFSTNLYFICIQ

LLNSFKPMPNAIQTVYFCFSFGFLLSRTSAVSLYAATVHDESLLPAPILYSVC

SASYSTEVRRFLTQVTTDNISLTGMKFFSITRSLILTVSTFVAGTIVTYELVLVQFNAVQAEHQQSESNI

TKVCETLEITDVKIEDF

>NvitGR2

MYEFAEPYSDAYKLKNIIVCNEVMTAEAKPKGHRNASPRRIHFGIGRKMMSFFRSSKSGRGKPRSQHTPI

FSKIHPAKRPALHSRRQSSNEDEPECFHRAIGNILLMSQFFGILPIRYIRSSSVRNFSFYKFAPRVIYSY FVLLAISVMTSISFLHLFRTLNANSFQTKGGIADATVGAMFYGNSLLGNLMFLRLCPKWISIQHDWRAMERLIDNNGKWKGPVLRWRFTLISSTILSLALLEHILSMVNNTPS

DVWFGKKNLEDFLIIYTNKSHRFIVRN

AGVDYNFTLGLFIFFISKVSTFTWNFTDLFIMLVSTGLAERYKRLNARILEATPAQLSVTDWHELRECYA

VLSALVKKVDNEISGIILLSFTNNIYFICLQLLNGLSPSTAEHPIINSIYFFGSFIFLIGRTTAVTLLTA

RINDQCKLILPILYNCPSVNYCREAQRLQQQIATDDVALTGHRFFSITRNFMLAVAGAIVTYEVVLLQFN

IALQRDEELNNMAAGSNG

>NvitGR18

MTLATTKISECYDYVFKLRILLEFNIKWLQFMQPPRSLKAMIIFQLDLSVPNVYDLSYQFMSHVKAPSVK

MFLPSNTADKLLFLIKLFIIIRIPTCGKNIHVIVHSAWQTFPAMRRSKCDDLFLKCLFYVLKFLGVAPMA

IDNSPAPEKDSPRYVRFVASKLGVFYNGIIACLTVYPSYMTVRYLTSSEYTKNIELEKVIDEAQSTFAMI

TSTFIIVNICVRQKRAAILANQLSSIHSVIMDLAIDVGDDVRRNTIISYIKKIVFVNLVTTIVWVASTPP

EEYQYLSYFIVMSFYNIIIHAMLLQYSLVLKLLQQLYRSVNADLSSLLKKSSSISDDNNCHLMLKRLKHL

RQIHATLCQISQDVSNFYSLPMLFCVTHVFLTQIIYCYYVVMTLIVWNINEKPILVILNCVTLVTLLAVS

MTILVRDAGVTAVESKSTGEIVSGSIDDCQDHEIERQLNVFSNYLLHKDVHFSVFNLFPLNESLLISIVG

SITTYLVILLEFEVDSTKK

>NvitGR51

MGDIFEDMEKPFLPMLISNWIFGIGIIEYPIRRQLKLLSIVYSTLILVVYAYLVYICHAHIYLTAVAQIK

PIIEMLHYYTNILITISIIIFGWFQTQGLQKCMLKAAQANLLMQQIGIFKNHSNILKNELRKFMAFFLFI

LSIIIINSTVTFYNFVPNYQQIIFIVILQNVPLLYGYIADSSFLNIIGYAYFKFDSLNKLLKSISITKAD

NPMHKIIAKQPFYEKVYPQVYSSIDYKDYTFLIKKIKLAHLRLVKLCREANNLYSFHILLSIAIAFVMII

NKIFNIYVVLNDDDIDEGSKFRTIVRSVNWLIYYIVRNLTSCCLCTTVLNTATKTGDLICELYDEPYITE

NTRAEIRYFNIELVQNKLEFSAYGVVNIDLTLLQVMASTIATYIIIIVQFQKLHFVPNALVGNQTNTYRI

>NvitGR49

MYSGKVSPPASTSKKAPISFRDTCLPILWLNRILSMVVIEVPEGRPWLTLSIIYATAKWVGYGYLLWYTV

KNDESRINSIPIMAAVFQVILYVNVVIAVLSTYLGLANYKKYELYFKKIELADETLEIFGIDPEYSSGFK

DYMKITAIWSLGGALVCATDFAIACYTFSSVPYAIIRILVFEIPMVLNPMVELNFSLMINAIGTRFERLN

ALIQSVAVTPLQSMNSRNFDKYQNILNRNQSKIAVKPNYYYYKNRNNIELLLRTARQLHLDLCATAREVN

DVCSRQMSMQMAAKFLLITGFAYCLYLIYNDPNIPLSGKLQHYVSLGAWIVINIARMIFVVRTSVNVTSE

AQKTSQIAHEIQVSKSQSNLIDEIHQLSLQIMQHPLFFTASGLLVLDFGYVRGFVGSVTTYLMILIQNQS DMLKAATTLANPNNDTSATTPSP

>NvitGR43

MILRKSTEDIIFFTTCLFYYFKVLGIAPISLYIKSTKKSASQCVVFTRSNRALVYDVVLILNLVTANIYK

ILYLCLRVSSTKIITIEAVTNCLEDFVTCLSAVFILIIICFSREKLSAMVNAISGLTECLDGFGVENPKK

HKLQLEIGMIILVNITTWILVFVTTAVAEFSYLLYDTIMYSNVIVVNALLIQYGVVLKLLRHNFKMLNEN

LLVISQEVPIKIQSPVESNRRVERLSQLRKLHASMCKVSRDVSNYYSYPALACVVCVFYTLIYTCYYLTR

PIVLYDQNLRGDMFVMSLVYGLLLVFSVVILTKSVTATIDESDRTKEIINAGLLRFEDDEKMSKKLNQFS

SYLLHTDVKFKVSKLFSLDDSLLTSMASSIATYLVIVLQFLQK

>NvitGR42

MFLKCLFYAFKLFGIAPMAIKALTSKKNKACHFLFVSSRLGILHNCILLCISISTIYFIIDDTLSRSLFT

DKSNLELVLDTACGICVALTSVVILLKMSINREKAIIIINKLNIIYQRKVESDKKNPSILLVGSVKIIIF

SIFIPTIFAAIALGLEQSSILISCLPFTTYQMTIIQYTLILKLLHYLYQSTNTELQSVLTSKVPISIVQN

RLLGMDTQRVSTKIELLREIHVVLSHLSNEVSGFYALPMFFCISNKFLVLIQYCYYIATVLSHKQDTTGQ

YEIILHCMSFSTVEALSIVYLTRAAGLVVTESKRTGEIVSQLIVDCPNKLVLKQLNGFFSYLLQVQVDFS

VFNLYQINESLLTSITSYITTYMVILLQFKETSCRSGSTEHTENMSTPPSVD

>NvitGR41

MFLKCLFYAFQFLGTAPITIKALGTKKNKACHFLFVSSRLGILHNCILLCISLPTIYLMIEDILARSFLR

KKTNLELVIDGVCAIYVVVPAFAFLLKISISAEKAIMIINKLNVIYQKRKIEFKKESPPVLLLRPVKIIV

FTNVVPLIIGCFVSGQHHISNLLPLPSFLTYQMTFMQYTLILKLLHYLYQSTNTELQSVLRSKVPIFIVH

NRFLGIDSQRISNKIELLREIHVLLCHLSKEVSDFYALPMFFCISNKFLILVQYFYYAAAILSDKQETAT

QYEILILTIWFTIVEALSLVVLARVAGLVVKESRRTGEIVGGLIAECPNKLILKQLNGFFCHLLLVQVDF

NVYNLYQINEPLLTSFTSYITTYIVILLQFKGISCPSDSTDHTENVSTPPSVN

>NvitGR29

MLNYFSIDLLYAKCLYYYFKCVGLATMSVSFKSTVENKKVPYSLFSPSKIGFLPNLVIVLIVIGTHFFSL

KMAFEVDEIETSVKFDRTVESVRLTFGVGVSVFILVFFCAKQEAAIDIANNIKKASVLSANFSTKTVSQK

ELFSVYRATGWIFSAHMVIWFLIYCSTPWSFGLMIYYVSLNIYELVITSTLVQYSILLKIVRQIFRNVNA

NILDIFGDSCAIDFHTVGTIGNNRSEVRFRRKMRKFSQLKDLHISVCDVAASLGQFYSIPALFCIKYEFI

SFTFYFYFVTKLFTGMYHETITIHTIFFYVFGILHFIVPLIDLVGSTSAVVNEGKTSVELISKWIEVVKD

QEQSTVRMSHFPNYFAQKKLKFTAAGLFPLDGSLILSIAGSITTYLMILLQFEGIKPYSS

>NvitGR15

MVKGTKYLFDIFKVFGLATMSMTDCTKKNNFKNRKMFSYSYHGIIYNGVLICFLIIAGIYKMYYIRDKLIDQSRMSEVIDVFGNFIIYAVSVVLLSKYMISQTLAVRIGNNLYS

INLVLKRFNLKYKNQYMIMHYKLVLLFDITIWLGVIIIGSFSDCTFIAAILTYIPNFIINCLVIQYVVIIIFIYGEAKALNNQLRKYVDRAFSNTLLYQFRRPVLSVHYYLPENNEII

LLQKSCLSIYEVSNNVSKFYSLSILICIVKLFFSIILNTYFFLKPSIFGKSMITSTMNHVWSISWLTLDTFSLCILTQYITMTVNEIKKTGDIVHQILRHSTSLGVIKQLNNFSLHLL

HKNIQFTAMDMFSLDCTLLHSIVGSITTYLVILIQFQENSSEKHKP

>NvitGR11

MKTTIINCILIKCVFYFMKLIGVCPFVLDKKEILKSSTSGKMYNLLLIVSYIYSYVIVIKCRRNLHYSEETQLGIIIDMIGITLKYSAVIVCWYTLAVHQTQVKSIIQHLKVIANN

QTMLASKCRREKINNEFKTFRYGLIVINILGLTILTQNNFINNYYKNCTTDFTFTLFDIFQIVIYNVIFIFLRIVLYTQENYRIINKALNKCTNYNELDNVNVTYDTILSLKKLQSA

GLAHKNISDLLENIVDFFRLPVLLIITAVFVQILIDVHLILYFIKTENWNHIKYYSLIHLLITFAIRVSATYFICSISDSTGIEGNNTKNIINVILNKWRFTKSHKNLAKMFIFNLHEH

KIQISLYGLFNVDYSLLKNLCSSTIMYVIFMFQLDGIIK

>NvitGR10

MVNLSDIKPLFYAARFFGCAPHRVTDSDVLLTTSGLIYSGIWALGFVCCCCYGLRLICAGVYTGERNMLALTAVRTLLAYVCFLADDALTMRWNERLRSALLQLRNFDVAVS

YGRKRSVNWKLRCCCWMLVGTIIAYWIGVGYVTYKCEMTNPLFNAITYVIANAAISMQLIKFAGLLILLRQRFRYLRELLPLEAAHPNSARRAIQLQDIWWLHCSLANAAE

TINSCYSLQLLLWIFTMWLNALSRIYAMNETLVDSGQFLLMLRESLLVTACIGNLMLIALACHYTAREANSVGRAAFAPQTSFSRKRSLLEHSLEVGVYFSLRQLHFSAAGGF

IQVDLPLLLSIAGAMTTYLVVLHNNS

>NvitGR7

KNSSSGSSPSSSIQDIRPTFLIARVFGLAPYAITNSSINVSKRGILYSVPWLGFYLYALYNRLNLYTHSDLETKFRILSVTRTALAVIALLVDLVVCTFRDDRFQNALDCVRKYDL

AVKYDVETNARLMRIHSWTIYSFMITYYLAIGWFTYVDEPYEGVMAAVIYVYLYLPLSIAVMKFVALITSILLRFRHLHRMLLPGFLSIMMELDSEPKRLHLRDVCWLHSCL

CAAAANVNSLYSLQLMLWFANLTFNTISRINDFGQPQNSIDAFKLARDAGLVLIFVTLVFFIAGVCHVTSTQANKVGAVVFSPGSRYFRSRVVDHQDKEDKFYIGQYFALHP

LHFSAASGFFQINLSLLLKIAGAMTTYLVILKSPSNC

>NvitGR45

KNMLFGKQIKKFDYLKLLYYYFKVFGLATMTFVTDSTKTTPNRFGTFSRSKYTIVYNVVIILVFVMPCLYNMTIFCVGTNRVKFEDFADCIQINMALFVTIFILSKFCISSDSLI

SIANSISRITESLLTLSSISLQKRIKVSFEIKQAFIVNITMWIAFIVINLSEIEPWMKNAVNMYVSNFLVSVLILQYSVILKFLQYDFKILNENLIEFRNEDSMKIRSPTETKAKIDGL

LKLQKLHESLSDTSRRVSMFYSYLMLVSVLNIFIMLIFVCYYLAKPIILTHDSNFSSIMLLRCFWYGLLFVVLLVTLTKFVTATIEESRRTKEIISSCLMIPDADEKLLNKLNQFS

LYLLHRDVKFTVWGLFTLDESLLTSMAGSITTYMVIVLQFQQKD

>NvitGR58

MGKKPMTRPILPLLISNWVLGIGIIEYPIGTPRPTFSFIYSTTLLVIYCTTSIMIRHEIFRVSIILKNNTVPMTIVFYTNIFLTISIVTLGWYRSKGLRRYVAKAAVADDLMERIGIPN

NHGKMLRAVAGQVIKGFFLVTVLIAIIAVIVLVEDAPLQTKILISSVMSFPLFTMFVSDAMFTSCVRCACYRFTELNKVLKAVLTSTHAFPQHKRVCSSVFESGGQDSNFVINNVSQRKNPAVIVKLAKEIHLQLISACQEINNTYGLHLLLSIIFAFAVITGNMYLCYMSSRNSNIPHYILVKTLVVSGIWIVHYGMKICYFSIVCGCCTENSIKTGDYINEFYDEPST

TNETKLKIRQFNMQLIQKPCKFTAWGFVDLNCHLIQVMIGTITTYLMILIQLGTTTYVADDSYSKYLKSFSSLTY

>NvitGR47

MFFGKPINKKIHSFKLLFHYFRALGLATMTCDLAPAKNATKYYWSFASSKSAIVYNVILVLIFVTSNGYSMTYFCSSNYQVDFDTIADCGQTTIYSFVALFILVRSCISRNGLIN

IANSISQITESLQSLSSIEIREKNKVGLDIKKLLFVNITIWTGLFVSTVLEVMPWTKYTITVHISNFIIIVLMIQYSVILKFLQYDFKVLNENLVEFRNEELTKVRLPTETKTKVDR

LLKLEKLHESLSDASRDVSMFYSYPMLASFLEVFIYLIFVCYYLTKPMILGNTYTTFMLIRSFWSGFTYAILLVTFTKSVTATIDESRRTKEIISSCLIIPVDEKVLSKLNQFSNYL

LHRDIKFTVFGLFSLDQSLLTSMAGSIATYMVIVLQFQQNNRLLFHVPYKSCYNKKYAK

>NvitGR53

MSDIINKLEKVVLSIAYYTNWFCGIGIIEYPIGKQHRVMSFLYTGVVLIVYSVLSVYVYSDFAIVSRDYEVNQTMMKGVYCATFILTFSTIVMGWYRNKEIRSILQRMNIAMRI

IDKLGASKNYTKAFTVQVGYAVGTLTFLIIIVIINALVVYKRDPKHDSHVLTVMAVNYPLIILQVVDTLFINIIQYARKNMRVINDVLREMLTSTQDFPQHTKIVRRYLRTLDSP

ELDTDIVDQKTDAEDKMYTINMSKKAHLTLVKICQETDDTFGLHILLSVIVAIITITVSIYHIYMLVDYLSISRAIYDNTLLPVCILLIYYYVKIHAISHFCSSTSEEVAAVITGDII

SELYDDSSIGIESQTEIRQFGDQIVQNSLTFKAHGFVTLDFTLIQNVVGFVTTYLMILIQFGSSTSIEISR

>NvitGR30

GNMLIKNLSLNETVLEKCILYFFKLSGIATLNFDFKLSTNRSKKFSSTFTRSKTGIAYNAALISLITIVTNYLIEFQINHNMYKNFYDKLDIGYAALISVTAVLILVKFSFQQEKTL

TIANELNEIRDSLSLNDCSVDGKGHALRRFIVLVFLAHFLFLTILFSTSYVLNNTTINIVRTTLNYIAIYLSNFIMHSMMLQYSIILKLIEHLSRGINDDLVEFSRPPQGLNSLTFTK

KTTSQRVGQLANLRKNFSSLCKVSQDVSEFYSWPMLLCLSCNFIAFVRAAFYIAMPIVHGTDAFTANIYVRCCCYISHNAFSLIILTKSVTASMTENRKTREIVNDCIENCDD

QEILKKLEKFSCYLMHKKITFSVFNLFSLDESLLMSVIGSITTYLVIILQFQNNNAE

>NvitGR28

PKKFYQNARISDLWFAKCVYYYFKTVGLATVSLRLKSVKKNKKNSSSLCTSSKLGILINVVLSLIVIAIFSYTTIVIAEGTFKNSLKFDRAIGVIRIILGSSAALIILITFSCKQGSI

TEIANNMQVLTIFSVLSANFKTKIGNTNESFSIFRETGGVFFVNIIAWLLLFVTVPTTNWKVFAVTPYVPEVIMTSMLVQYNMVLNLVKRLMEVVNANLLYTSQYDDKYEDN

QITMIKNDRNENSFKRKIIKFTQLRDSHYMLCDISEDLEKFYSRLVLLCITYIFGSLILCSYFNTKEVLKQGVEFLTLRATLFFGVTVIHYIMPLVNLTRSTSAVIAESKRTVKIVN

RWSGNFHNQPEIAMFNQFPNYLDQPNLEFTAGELLALDGSLLISIAASITTYLMILLQVQDTSPN

>NvitGR21

MICKPHYTSDFFFLKCLFYWFKIFGTSPMGIDFTSAVKSNDVPQDVHFVFSKLGILHNAILVCLAIIPSCVTIKEAYHTEYTDRLQLERVIDTVHAVATIMTFYFILINVCINQKR

AVAIANQLNSIYSQSTSLFSKSKIRPNRAFRSVKKIVSIHMVLMLLLCLFAFTFVHQNLIYHLFINFTNVTIYVMALQYSLVLKLLQHLYRSLNADLRSFLITRDRRDPSSISLPI

DELQCRLMQVYEIHASVSRVSQDVCDFYSLPLFFLFAIAFFTLVLFFYYFMLVLLLMNKMIDYGFVLPFFLTLLGLTILAISTLARIAGGTVKESNITREIVSESIMNQRNQPISG

QLRDFLHYLQQKNAKFTVFDLFPINESLLMSIASSISTYLVILLQFKESNSTQQTAPSSAT

>NvitGR14

MKKTLYVCVYYFVKILGLCPFTRKKGRFVKVSHVGMSYNVLITILYSRAFVKAIQNRHSIRLSQETPLAVIIDTFTHVLSYSTIVSSWLVCAFRQKIFIKVFQSFKNVENLENDLLPSMHCSKNGLEENLKEFRARFIVVNLICIIFTGSTVVIISMCEDMKNQSWFWFIYNIPINVTFNVAFILTEFMRCLRKHYKIINREASKLARSRKRSFARMPMAFSKKLQTIG

RIHSDLTELGETVVKLFSLPVLMTVHGHSANIILAIHGLYRILKSDQSMGGPCVLYAPTVKFMIYSIIIFFICSIPVSTCNEADKTLRIIGQIPYEWHEEEMHNKMIKNLMFQLYQ

KRLQVSIFGFFNLDYSLFRNVWIVIIMYLIFVLQLDPSSFIFAILK

>NvitGR6

QKKSPGNEESPLYEVVCPAVYLARVFGLAPYELEDARPDNNRPKRLGASTVYCFFSIFWLIVYTYIVVISLIRFGGLDRDKPVLGVTEDGKLILNYLVSMVDTLLCIRCRERFV

HVWNSIQDFDESFQLGNVPAGRDSPRYSPILRRARFWVWTILTTNVVGWTMINQLGMHAFGEPYLQNIGYMLTYVGTCVAVLKFVGVVMLLGQRFAYLNEELARQRKKE

EGRRSRAADEIVKKIESSYNKLLSTSEELGNIYSFSLFLYLLNLFCHAVSNMYFFTIWTILDPGYLKNPKIVFCLFSWLLIYLVQMLLIHVACHFTSLEANRMASVLLDWRRQA

YRQSKYEFSSTLHYLNRRLNFTAAGCFNVNLPLLTSIFGHLTTYLVILLQIPDSSNS

>NvitGR4

MYKDLYNTLEPIMWVWRFVGAYPFVIRGPIGSQQYVLSTYSIMLSLIFLIVTLQYCYKSVDFINQSATEYSLFLITISVQQVSNVICFFDSVVLKLFFGKKITRSIENIAIQDKKL

SKIGCSLNYSQAVRKGRLYIFILFIFLCFHIHSELVYFNGGAPLLLRIFGNYLAMLQVANVILFAWLMFNVGLRFQVINCKIKTCIFDIEWADQNSSCLLVLRTTAKAHAQLCQA

AKIINGTFVLSIINCVLSAFIFTTTMLYYIFMELKNTLPFSHAVYYCSVILIHATTIVIIVQSCNWVHRNAHATVKVLHEFSKENNRFDDDKHLNQIIHNFSMQILHHNLTFSAW

GLFPIDSTLLQSLAEAVTTYLVILIQFDPLVT

>NvitGR46

MLFLKKSNNKNLDYLKLLFYFFKVFGLASMTIDATTAKNTRNHFWTFTRSKSTVIYNVIFILVFVISNIYSMTFFCRGTYVVNFETIGDCGQTTLSLFVALFILTKSCISRNTLIII

ANSISRITDSLLSLSSTSIQENSKISSEIKKMFIINISTWTVLFGTFAFDLKPLTKYGIVVFFSNCIINHLVIQYSVILKLIKHNYKILNENLIEFGDQESMAIRSPSEAKIKVDRLLKL

QKLHESLSDTSREVSNYYSYPMLVCVLHVFIILIFVCYYFFKPMILHSKNLSTFTFLRTIGYGFAYGLLLVTLTKCVAATIDEQNRRTKEIIGSCLMISADEKVLNKLNKFSTYLL

HRDIKFTVLGLFSLDESLLTTMVGSITTYMVIVLQFQQNLKR

>NvitGR23

STHCFLFNFDEMFLKSLFYFYKIFGVAPMTLDSTKNRPSDVSFAYSKFGILYNLFLVILTIFAFYQCAILVHFDVSVGMDFQRFVNTTHLIFFVFTTLIVLIIFCVRQERAVALANR

LSSIYYLNKNIKLSAILPSIKGIVSMTFITTIMWLVTTPYDDAHLLTYYVAISLYNFVINSVFLQYSVLLKLLYHLYRSLNTDLRSLLESLDIAIEMDRHSNNEIKLTSGRLKRLRE

IHMLLCHLSGDVADFYSLPIFFCITNAFFVLIIYSYYVFRGFAIAIMPVLVTVHCTTMMVVIVVSLTILLRTASVTAAESRVSGEIVSESMASCSNQFIGRQLEVLSIYFLHKNVK

FCVFNLYSLDESLLMSIVGVITTYLMILLQLDGSSNCK

>NvitGR52

MVDIFVDMEKPFLPMLVSNWIFGIGIAQYPIGVPHRVLSFTYSLLNITLYCVVAFFAYPYYIKFIDVTKSTLTTMIFSFSISILLTIIMITSGWFQAKGVRKCIIKAAIVNYLMQQI

MIPKESTVIFFKEFIKFLIPLTSIFLIITFNLFITFSESFAHIGQIGANFTMNYPIIVMFIIDSSFVNIIGKVKNYILILMYANFKFIKLNELLYSLLTSSADVPQHKRTFKEFIYKEKNSK

FQYLKSIRKDYSDVIKCAKQIHLRLVELCQHASNTYGLHFLISTAFAIGIMIYNTYNIYNILASIVITSAEYNIHIMKPILYNCNWLTYNILKIVRLSWFCDSICKESVRSGDIASE

LYDEPFISENTKSEIRDFENELISNKLTLTAYGFFHLDFTLVHAMICTVATYLMIIIQVKSTCR

>NvitGR50 RNNKINPRKGRPILNIADSFRPFVWINGLMGFGMIEMPYGRPWPKLSVFYGLLRAIAFSILSWYVFKNIQPNTRISALMFLIYKIIIAASVGAVVISSIMGLINHEKSKKLYKKIK

LVDETLKMFGVEPEYASDLRRNRNIIINYYRAIIVLFIIKLGSSYIFSREAFCTRNILNVLYFNIPSIINPLVDINYTSKIHVLEKRFERLNALIHNVTTSPSKMMHTHDFKKYEMIL

NNRGVISVIPKYCFKNRNNIEHLLKVTRQLHLDLCNTARNMNNLIYTQMSAQLSAIFVHLTAGTYCFYFIFNEKTIIPLQAKIHSYVLLIFSIICGIVRIILITYATAGKISKILHEIQ

IQNTEKKLTNEIHQFCMQLKQHPLSFTVCGFVELNFSYVTGFVGAVTTYLMILIQNQTDMIEAAKTMVDPIKSNSTSVTPA

>NvitGR48

RRTKPDADALPSVENVTRTLTPVLWLSRFSGLTVFEMPAGTPWPKFSAAYALFLCSAYGTMIWFGETFIVKETTSVPLVIFIYALVKYVNAFLAAVSFAVGLLHYKKTMKFTK

RLKHVDETLKVFGIEPEYAASRKENIRIVLIWIVATVFQIIGDAAICFVIYDPAYIAILKFFIFHIPFQSMSLLELTFAMKISTVRSRFEKLNALFQNVLENPVLPMHFKHVNKYHN

ILRRQHSEEGDRNRKNLELLLMTSRQLHLELCAITREINEVYGKQLAMSIAAKFIYVTGYGYVFYLYYNEPSISLSIKILNCTYIAYNLTFITVMMIYFIGQSVAAQKTTQIAHE

MPVTQSQTKIIDEIHQFSLQVTQHPLEITAASLFTLNFAFMRGFIGSMTTYLIILIQYQPNIAAAAKSMIDEIMANMQNVSAFYHFANFST

>NvitGR40

MFIKDFINKKDKVFVKFIFYYFKVLGTATISFNTESTKSRKRNEWKFTHSKSSIMYNIGLIIFVTTVSSFGFIYASFQHQTNFKKFERVTDRAEDVFNILSVTIIMMMFCFKYKN

MAGIANKMSMIYQSLISSCPQTLYKSFTDNILLHIILIISPYIIIWPFIIVFNFINFPEFEIYNFTIFMNDIVITALLMHYSTVLILLKYFFKMFNVRLSFMLEEQDYLCEIQYLNCNN

RSKGKIKELFHMRKLYASLYEVSQDVSSFYSGPMFLCIFKILVSATLSLYYVAKPIIIDSHTILNVEIIRNSMFGLIYATALLIFTTLVTQTARESVKTREITNRCIINFENKYIIKELS

QFSTFLLQADVTFTVYGFFSLNQSLLTSMTASMTTYLVIILQFQQNN

>NvitGR39

MDILKITLNFFKMCGLATMRFDAGTTQNTSVQSSWCTSSKKGQVYNLFLICLITASNGYVATIVYEYNISTQEFDKSFDVAQYIYTSATTVAILMLYCFCQGRAVSIVNNLKIM

HKLVTNVNSRLSKEEEPTMGGLKRIAIMTTVIWFVVVFTSCNLSFGVVMYYLTLYPCILIINCTFLQYTMILHLLKQLFAILNANFRYVSRQSIVPKIAVAATNSMLQISTKKTQ

PFSDLCELYTSLCDLSMDISKFYHLAMLFCVSHVFITLTTWLYYITKPLVTGAIELSIIDYTHSLLILMHNFFMLFILTKSVDAVVDEKTGKITNRWLANLQDQHLVNELNLFSN

YLLHKNVSFTVYGLFSLNETLLMSITGSITTYLVIILQFQSGVQK

>NvitGR38

MLSIKHMFYFFKLSGVATMKFNTNLIETGRVQGSWFSGSRKGIAHNIVLICLIFVFNCFGVRTVYYWSHIQFERVIDVVLYAYTTVIAILILIVYCFRQKQAIAIANKLQILREFT

MSINGQLNQGEQLVVSSLKRISVAHLVIWFALIMSTSTEMYMLVYSIATYPCILIINCTIVQYSVVLKYLRQLYVILNANFFNCSKQFSANTSSVRTNSLSDLRELYMSLCNLSA

DVSEFYHLLMLLCLSYLFVTLLLWCYYIVAPIFVKATVLPILYGYVRSLIIVIHHVLMLVILTQSVSALTRENKKTGEIINKGISNLGNQRVLNELNMFSNYLLHKDMKFTVYG

LFELNESILMTFAGSITTYLVIILQFHSRD

>NvitGR37

HQSFQYKLSEKNMITLKRIFYFFKICGLATMKFDSNMAVKERLQGSWFVNSCKGKVYNAILIILLSIATYYVTAFVYDLSISSGEVGKLFDIVSYVFTTITTIVILAVFCLCQKD

AVLIANNLRRTHMLIANINSQLSNEKINILRTAKIICIVNLVMLILVFITTLRQEFGIIMYYTTVYPCLFVINFTFLQYSLILQSLKQQFTILNRNFHYVLRQCIMQKNLGATGSSF

QTHKVRAQSLSKLCELYASLCDLSTDLSKFYYPTMLFCVLYTFMMSTTWIYYTVEPVIVGKTKLTTFKYIHSLIFLIHHISMLIILSKSVNAVVLENKRTGEITNRGLANMQNQ

QTINELNFFSNYLLHKNVSFTVYGLFSLDESLLMSITGSITTYIVILLQFQSSVQ

>NvitGR35

LFMILKNWKISDLLFLKCVFYLFKLFGLATTSIQTKPSTSRFHLPLFTRSKLGQIYNVILAIGISFVYACLIRWTIKHYEHHIISRSHQAIDYTHTTMAMITAIFVLLVFCIQQEKF

LNLGNRTVRLGELLVGFYEVQRPSKQKTLTKHVKEIYIMVGMTWLSIFVTTETGGYFKNVVYFSMIYLCNQIITLTLLQYSAILRCLQQILWFVNENFLQFSKEPCQMDKIKI

QFSKLRELYLSVCEIAEDIERFYAKPMLLCIVYVFVTLIFFASFITKPMVSAVVISDFQICHCSFRILHYVVALIILVKSVTAAVSESKRTGKIVNKWLGDCNTLQVDPKIYHFSN

YLLHHNLHFSVLELFSLDGSLLMSITASITTYLVIFLQLQE

>NvitGR34

LKMPFNNPLTSGAAVLKCVYYVCKACGLAPIAIRSNDGRKLRFPPFEHSKAGLLYNAVLILIILSMSAAIIQCTFVYRTKAEILKFDGVIDVTHNTMASVTAIFVLTVFCIQQRK

ILELANRMRVLGEMSQSLCDVEICGGRKRLLRDVMMICLTTCCTWLSIFFTTQVESYKGLLYFSYIYLCNLIITLTLMQYSIVLRLMQQILRVVNANFHHFSTEPSQRKLKVQI

IETSCQGIGRFTRLRELYLSLSEVAEGFEEFYSQPMLLCIAYIFLTLIFYAHLITKPMVVGTRSVTNPQLCHCVFRIMHYVISLITLAKSVSTVITESKKTSKIFNKWLGTLDSLQL

DPKLYLFSNYLLHHSLQFSVFQLFSLDGSLLMSITASITTYLVIFLQFQNHQTTDS

>NvitGR33

MFGKFDETILEKLLFYFFKMFGMATMKYEISTIKNEKIKKRRLFTYSKIDIVYNSFLILVTTILNIILVGLKIDDKTSLPNVRGVQKITDVVQFGFATLTCVFILVYFCARQKKAI

EMADQICQIYGSMIVNNCDTGEKRSILLITLFVFSINFIFWLVMIITSVNVTMATPNNLIFYYLAVYSCHVIMQTLLMQYSIILNMIGYFFLHINKSLVILLKKPNQLFLDAQCRN

IDKTRGERLLKMRKTYLILCKISEDISDFYSPLMFFCLSVTFVTLIRSGLYIAVSIADKESNLTIKGMIHCIGYVVHYYFLLVMLTKKASKIVTESKRTGEIVSDCVHYVDNQEII

LNQFSNYLLHKKIKFTVFNLFVLDESLLLLFAGSMATYLVIMMDF

>NvitGR32

MWFSNFHDTREAFFVMFVYLFFKAFGLATVKFNFESIKKTLIAGKEASEVLKPSRVGIAYNMLLIIILSILNYVAIRVSYERPDFTDRSELEMKIDTVKAVTACFSSFIILLIFSFQ

QEKYVLTVHEVLSIRQSLISINSAIYFENESIWKIITKLLIFMFVNWILLFITIEIQNDYQFLLYFVTTNLCDMIMTHTVLQFSIALKMIEQLFRVTNANFDHDSKASFRLNDEICL

NVALKKVQVILNKLSRLQDLHLSLCNVFEDLAGFYAQSMLLCVWYIFVSMILSAFYVTKPIITGNTGLSVVMYLRTVIHFLHHTSLLIMLTKCVTDLIAEREKTGKIISVWLA

KIDNQQFEKKLTKFSIYLMHQKVKFSVFGIFSLDNSILLSIIGTITTYLIILQQENLSSNSNNSNCH

>NvitGR26

MHIRNIHCKITIGKVLHYSLKIFGLAPFSLDVEFLSNNKNQVSSEALTCSQLGVIYNLILAVLIMVITYLTFKISNKTHIFGSGTDLDMAIEAIKTVWACISSVIILFLFGTQQKKL

VQCGNIMLMIRERLITINETLYLENKFLWKSITKISLVVIVMYILIIVTLGGYIDLARLIYVIGATLCDVIIIFTVIVYGIKLKMIKQLIKIINANINSISTEFNRASNNILQNNEMKN

AQIICDKLSRLQNLHLLLFNATEDLTNVYATSILLCTLYIFLSIILNLFYILKNVMTGVASLSAILIRHIFIQFIHCTCSLIILTNSVTDLVLESNRTGKIVSEWLTKLKNSRVENEVT

KFLLYLKEHELQFSVFGIFSLDTSMLLSITSSITTYLVILLQLQFQQN

>NvitGR25

VKMLHKNIVNKESIILKFIFYYFKLVGLSCVSFSSKSRLDICFLTSKLGALYNVILALLITCFNYYVVLIVVKVSFGSLHFDRAIDFGRVCLAVISSVFILITYCFKRKKATIILNRI

NTIAELSVNLRSNGKSGHDGLCKPAKRIFFVFLVTWLVLIAVTPKLKFYALLYFAAQYSCEMVIMCMLVQYSMLLSILKQLFETINARFTISSEANFQVRRFSQHRSNEFGLEV

KLNRFSYLRELHLSLCEVAEDLSQFYSQSLLFCIAYVFSSLVLYAYFFVKIVTQKGDGIINTATTRFIIVKLLHYIGPTVTVTWAACAVVNESNRTGKIVNKWMGDSRDQYVAIKLNQFSNYLLHQKLSFRAAGLFSLDGTLMMSIAASITTYIMILLQFQDSTKR

>NvitGR22

MFIKCLFYAFKIFGLAPMVIDTTSTEKNNKEAHKIIFLSSKLGVLYNAALAILITLPTYLAITFAYSDYVGRLEFEKITDTIQSVFTIFTSVFILINVCVHQKRAVDLANRLQTVN

YLSMTKVSCSDKSVKLLSSIKRIVLANAVTTILYFAVTPSNETRVLIYFLVINVYNTIIQATLMQYSLILKLLHHIYRSLNSELSSLNKSLIFVGEFNQFLNNSVQTILRRLQTVW

VTHLLLSHVSREVSDFYSLPMLLCLSNAFLTLIMYSYHFVRALFIWKEHSGNMVVLILRTFMQVVTVAVSLTILTRAAGLTVSESKRTGEIVSESTVYGHNRQIRSRLKEFADY

LLHKELKFCVFNLFALNEELVMSIAGSISTYLVILVQFNETSSIEN

>NvitGR20

MIVSKCVFYFFKIFGLATMRLDENETVRDSWCSGSKKGQVYNAILTCSIIASNCYVARLVYKENLSHREFEKTFDVVQYVYTTVTVAVILTVFCFCQGRAVLIANNLRKTYVL

VENINSQMSKKEEDPVISGLKRIWITSTVIWISVVFTTSKLQFAVVMYYMTVYPCILIVNCAFLQYTIILHLLKQLFTILNANFLYVSTRQSVVTRKVEAAHSSFQAAEQSSQQ

FSDLRRLYMLLCDLSMDVSKFYHLIMLFCVTYVFSTLTMWLYYITAPLVTGTTPSKLQYIHSLMIVTYHIFMLIILTKSVDAVVQEKNKRTGEITNGWLANLQNQQLINELNL

FSNYLLHKNVSFTAYGLFSLDESLLMSITGSITTYLVILLQFQ

>NvitGR13

MQSRHTYTKLFVRCFLRIIGLFPLFLDINGNPIFSYLGLFFNLCLVFAYIFMSIIAFQKRMTLVLPKETVVAQIVDMIADGLENLNIISCLLVVAFRQKCLVKFYEKLKAIDLRLY

DINVKHCKTFDINMNIISLGRKLTIVGISFFIICTVDHLRLLFDNYLLSIRFWIAYQSTKIVIYNLIIVFCETMIFFRKSFAKLNLLFQQSSSSYDKIQDIGQLHKILSELVDDFVGFY

SFMVGSTIVHNFIHLSSNMYRIYLFLKFNGDWSLLDFLDFTSIMIWLNVKILILYFLCALPAAVSEEANKKSIFIHRMLKAVRENDLTSNNKRIARLLTILYQTNLEISVYGVFIL

DFKCFQSILTTSTMYIVFMIQLEHLK

>NvitGR12

MKKVNGIHIIKTLYFYEKLMGLCPFILSNKIVIKFSYIGAVYNLLITLIYTYYFILIIGLRFELHLTRESTLSIALDAFGLAFQYCSIVSAWLTLTFRQECLKKILVTFAKVNLLANN

LSMTLTRYCLRKLQYIAVRLMLINLMYIVIFLSEHYLLKTYKKFEEHASTWIWFNLPKLVIYNIFGIFIELMIILQQDYRALNKVISYSFSEKIDATSFCNFSESPGVISKKLCTIA

EFHENLSDILEYTTNLFSLPLLFALLASFLHLTLDSYIVYQHLLSKRMWEFNDFSSYVICLVWISTKILGFYFLCSVPDSTSAEANHTVIILIKIINNCYKVRSCRDMMKKLMLQ

FKQKKNYASLYGLFSLDYYLFKNIMSTSVMFLVFMFQLDDLVT

>NvitGR9

GKKWKIFSATDFLSLIKPSLLVCRFFGLISYKILNGKIEQSKNCGSYCAIVTFVYICASLLILYIINVSPYMNRASTWMLQGNCFYTLVNFMLVSNFVFKSSTIKILQNLADTTAK

LPSEKFVKISKWIHSKDLVLYLLLLLHVPKVFVGNIYAVLSKIIGTYAAMTIYLLDFQYNSYVFIIASCFEHINEELVQLNYNACKERGHLLRRVYHHQFNPLLFVKLRYLKQW

HYELNEIIRKINSNFSLQVVATVIMTFTELTFGLYFYILDRRHKVRSLDKEIWYFYYHTMVMYFSTKLLLLTLTCQYANNENYKTRTIVNEIIISTDNKLFKEEIYLFSLQLLHTD

NKFIAKGVQLDATLLTGMAKGIFTYLLILIQFLITN

>NvitGR8

CKNLTFVQITNIYQLMRPYFFLYKLYGLFPYKISKNQIHSSKIGLCHTFFVAMSCIVYFVIAMYQCFYSLDIVFDTTESLMQFTSYFMLGTFIAVYSCASNKYKFLLLKKLILLS

SMLSEKEFFEVAKVIYFKDIIGYIFLMGQIFNIASEDLTAQNISKMFALHITMIVFLMDMQYSNFVFLLKSCLKNVNNNLQLLTKSYEGCEIISCNKSMQLLQFNNLQLIKLRKLQHNHHHVSCVIKELNTVFTLQIIATVLMTFAEVTFGLYFFILHIQGKKGIDLDKQLWFNYFITSVTYYSLKMAVMVWICQETKNESLKTGIIVHDVILNNNNEQLKSELSLFSL

QLLQCNNEFTSKCIVMNANLISGVVSGIATYLLILIQFLNTKKSTSKNNEQ

>AmelGR64f

MHSEDQIQLMMLKTKDGLGEIPKGKGRGSNLKIWSSVMYHKDDNNIEDISANQENDLSTKRPRAERNYFR

NSEALENFHCAIGPVLKAAQIFGMFPVSGIGSSSLSKLQFKIFSLLTMYSGFIALMISFMTIVSMIHMLK

TFNASTFQIRGGLGAATVGAVFYGNSLVGSILFFSLSSRWVSLQYEWRAMERYIDSNSTEPTRLRWKFFI

ISTMVLVLSLIEHVLSIFNNIDGYEWNESNSTFHNFLEIYTLRSHSFIFDTLNYNFVYGLYVFVVSKLAT

FTWNFTDLFIMLVATGLAERYKSLNKKLAVTMTKCQAAFNWRELREDYAILSCIVKKVDDHISPIILLSF

ANNVYFICLQLLNGLSISDKNSVLSEAYFFGSFAFLICRTCAVTLLTARIHDQSKQALPYLYNCSTSSYS

VEVQRLQCQLATDDIALTGLRFFSITRNFMLAVAGAIITYEVVLLQFNGK

>AmelGR64f3

MSEPVAFSANSFNPKTDSLHASMRPIIMLAQFFSLFPVSGVNSPDSSYLRFTWRSPKFIYCTISFLSSSI

MTIFNVLRIVTTGISSIKMTTFVFNGTNLIASFLFLKLAMRWPCLMVTWEKLEKELSQRHRKISKISLSM

KFKIVTIVVMTFALVEHSLSIIHGYFKAKECIEFHREQSILGVYFQMQFPQIFSRTSYSLWKGILVDIIN

ILSTFSWNFVDLFLILISIALTDQFRQLNSRLYSIRGKYHFIVKAMPEWWWAEARSDYNHLATLTRQLDS

HISIMVLLSFATDLYFICIQLLFSFNPMRGIIEKIYFGFSFGFLLARTTVVSLCAATIHDESLLPAPILY

SVSSSSFSTEVMRFLSQVTTDNICLTGMKFFSVTRSLVLTVAGTIVTYELVLVQFNTTQQTDASNATIVC

ELVSLDSLSS

>AmelGR43a

MEVKRVEEKRKILFNNELCQAIFPIYYLGKFCGLVPVRFFVHTSEGCQARLNIIDLIYSLCVLVLLLSAE

IWGLWRDLKDGWEYSTRLKSRTAVIATCSDVLGVMSLTVVCIVGSPFRWKYLQLVINKLIEVDEKIGVSS

AKVARRFTIVLTICSLSYLWFNSIIDFYTWNRKTKVDNKAMTGKGPINYAPLYFMYTVIISTEIQYTVST

YNIGQRFIRLNTSLKDLFNANSNNNDNAIDYFRKCPETAHDMDDKKIWNLKPKRQIVLGSYRLSRKLDEN

KMYVNNISELIMVHSSLCDAVSLINSTFGVVILAVTVTCLLHLVITPYFLILQAGERHEWIFLIVQGGWC

IFHITRMLIIVQPSYSAIAEAKKTAVLVSQLLSCTFEANIRRELEIFSLQLLHRPLEFSACGLFSLDRNL

ITSIAGVVTTYLVILIQFQNADDTKDDFDIIRNATQILKNASPLQNFTGLKTIV

>DmelGR21a

MTFLDRTMSFWAVSRGLTPPSKVVPMLNPNQRQFLEDEVRYREKLKLMARGDAMEEVYVRKQETVDDPLE

LDKHDSFYQTTKSLLVLFQIMGVMPIHRNPPEKNLPRTGYSWGSKQVMWAIFIYSCQTTIVVLVLRERVK KFVTSPDKRFDEAIYNVIFISLLFTNFLLPVASWRHGPQVAIFKNMWTNYQYKFFKTTGSPIVFPNLYPL

TWSLCVFSWLLSIAINLSQYFLQPDFRLWYTFAYYPIIAMLNCFCSLWYINCNAFGTASRALSDALQTTI

RGEKPAQKLTEYRHLWVDLSHMMQQLGRAYSNMYGMYCLVIFFTTIIATYGSISEIIDHGATYKEVGLFV

IVFYCMGLLYIICNEAHYASRKVGLDFQTKLLNINLTAVDAATQKEVEMLLVAINKNPPIMNLDGYANIN

RELITTNISFMATYLVVLLQFKITEQRRIGQQQA

>DmelGR63a

MANYYRRKKGDAVFLNAKPLNSANAQAYLYGVRKYSIGLAERLDADYEAPPLDRKKSSDSTASNNPEFKP

SVFYRNIDPINWFLRIIGVLPIVRHGPARAKFEMNSASFIYSVVFFVLLACYVGYVANNRIHIVRSLSGP

FEEAVIAYLFLVNILPIMIIPILWYEARKIAKLFNDWDDFEVLYYQISGHSLPLKLRQKAVYIAIVLPIL

SVLSVVITHVTMSDLNINQVVPYCILDNLTAMLGAWWFLICEAMSITAHLLAERFQKALKHIGPAAMVAD

YRVLWLRLSKLTRDTGNALCYTFVFMSLYLFFIITLSIYGLMSQLSEGFGIKDIGLTITALWNIGLLFYI

CDEAHYASVNVRTNFQKKLLMVELNWMNSDAQTEINMFLRATEMNPSTINCGGFFDVNRTLFKGLLTTMV

TYLVVLLQFQISIPTDKGDSEGANNITVVDFVMDSLDNDMSLMGASTLSTTTVGTTLPPPIMKLKGRKG

>DmelGR43a

MEISQPSIGIFYISKVLALAPYATVRNSKGRVEIGRSWLFTVYSATLTVVMVFLTYRGLLFDANSEIPVR

MKSATSKVVTALDVSVVVMAIVSGVYCGLFSLNDTLELNDRLNKIDNTLNAYNNFRRDRWRALGMAAVSL

LAISILVGLDVGTWMRIAQDMNIAQSDTELNVHWYIPFYSLYFILTGLQVNIANTAYGLGRRFGRLNRML

SSSFLAENNATSAIKPQKVSTVKNVSVNRPAMPSALHASLTKLNGETLPSEAAAKNKGLLLKSLADSHES

LGKCVHLLSNSFGIAVLFILVSCLLHLVATAYFLFLELLSKRDNGYLWVQMLWICFHFLRLLMVVEPCHL

AARESRKTIQIVCEIERKVHEPILAEAVKKFWQQLLVVDADFSACGLCRVNRTILTSFASAIATYLVILI

QFQRTNG

>DmelGR64f

MKILPKLERKLRRLKKRVTRTSLFRKLDLVHESARKKAFQESCETYKNQIENEYEIRNSLPKLSRSDKEA

FLSDGSFHQAVGRVLLVAEFFAMMPVKGVTGKHPSDLSFSWRNIRTCFSLLFIASSLANFGLSLFKVLNN

PISFNSIKPIIFRGSVLLVLIVALNLARQWPQLMMYWHTVEKDLPQYKTQLTKWKMGHTISMVMLLGMML

SFAEHILSMVSAINYASFCNRTADPIQNYFLRTNDEIFFVTSYSTTLALWGKFQNVFSTFIWNYMDLFVM

IVSIGLASKFRQLNDDLRNFKGMNMAPSYWSERRIQYRNICILCDKMDDAISLITMVSFSNNLYFICVQL

LRSLNTMPSVAHAVYFYFSLIFLIGRTLAVSLYSSSVHDESRLTLRYLRCVPKESWCPEVKRFTEEVISD

EVALTGMKFFHLTRKLVLSVAGTIVTYELVLIQFHEDNDLWDCDQSYYS

>CfloGR28a

MPKHVTSILNALRPLCLYNGILGLTIFEMPIGIPWPKLSILYAVVRSIIYVYFFWQFRRMSHINYFAIETMITTIRIIHL

SNIFIAVVSTILGFKNYKEVKTFAKKITLADETLEIFGIDPEYKATFDLCMQAIFIWCFGSCVILSSDLAIAYYYFDDFY

DMLVRVLLFQFPLILNLTNELNFYLIIYILGTRFERLNSVVQSATSSALQPDDLKNHNKYQNTMKKYINKVTVQPVHYNK

NRNNIEFVLRIVRQLHLDLCAMSREVNDTFSKQLSLQMAATFLLLTGFGYCTYVVYIDVNYSLAKKIHHFYTLGIWIAMS

IFRIMCVIRVTVNVSEESQKTSQLAHEIQVSRWQKKITDEIHQISLQIMQHPLYFTASGLIVLDFGFVRGFVGSVTTYLM

ILIQNEPDMVKAANALVEVSSDNETSSKS

>CfloGR64f

MSELRFRATLAESPQHGRYETFKMDSIPIDASRSSASNSGANLIESTRSFHCALKPIVTLAQCFAVFPVDGVQSSDASSL

KFTWKSFKVLYCCLSATGSIVLTMFSVYRLATTSITSSKTSNLVFFFTAGITVLLFLKLSRQWPSFAVSWENMERELAAR

HNSRRLNAISLILKFKILSAVVMILALVEHTLSILSGYVSAIECAHIRGHSDIVATYFSLQFPQIFTETNYANWKGVIVQ

YINILSTFSWSFMDLFLILISVALTDQFKQLNHRLYSIRGKHCFVVKAMPEWWWAEARVDFNRLAAMTRRVDDKISDIVM

LSFSTNLYFICIQLLNSFKPLPNAIQTVYFCFSFGFLLSRTVAVSLYAASVHDESLLPAPILYSVCSASYSAEVRRFLNQ

VTTDHVSLTGMKFFSITRSLILTVAGTIVTYELILVQFNAVQSDHQHSVSNITKICESPDSSITDVKIEERYFCFLIAEH

ILSILSGYARSVQCARNHGNIDVANVYFILKFPELFTKHNYALWKAFIIKVVNIISTFSWTFIDLFLILMSVSLTDQFKY

FNRRLYTTFDKIMPEDWWTEARKDFNYLATITRKVDSEISSIVLLSFSANLYFICIQLLNSFNPMPNVIHRIYFCFSFGF

LLLRTVAVSLYAANIHEESLLPASVLYNVETTSFSIEVERFLSQVTTDHISLTGMKFFSVTRSLILTVVGTIVTYELVLM

QFNSIQDDQQENSSNMTKVCNLK

>CfloGR43a

MEVWSDEPKKNKTTTTRPRNDRLEAESKVGPNSEKIKSDVFHTLAPIYHMSKIFGLLPVKFTKDSGGRYRGRLQGSQIIY

GIVVLLGYMGAQCYGLYRDLRNGWQNSTRLSSETAITVTCSDVLAVISVVTSAIIGSSFRWRHLQAALNMIVDVDEKLGI

MTSKNLRRGSIIVISCTFVYLVTISLLDYISWSYSFDKKNVQVYDDKGPINYSPIYFMYIVIMTFEMQYALVLFNVGERF

LKLNKTIENLTKTNLIIEYFRKDMGLTAPSDPRKNLFQAISFVSSDIGHSRLRRTNKVSDFIVSSEGNGGTSEAIDQLIT

LHGTLCDCIIRINKAYGGTILIGTISCLIHLIITPYFLYNEIYLDNSSNWYVLALQVFWIIFHVYRLLLFVQPCYMVSVK

AKITGALVSQALAQNWDPKAKKQLEIFSLQLLHRPVEFTACGLFFLDRGLVTSIVGAVTTYLVILVQFQNADDTKGTKHL

LQNATELLKNASSFKNISVFKNTS

>TchiGR43a

MGIRRHAIPRPTTSTYHVKSDNMDAWSISPKDLKPIGVAAADQQKQQQLQLQQQPLGPKKLTSDDLKKGPDTGSGGGGGS

KSDVFHTLAPVYHLSKICGLLPVKFKANKAGKYEGRLDVAEVAYGIVLVAALAGAQCYGLYRDLRNGWENSTRLSSETAI TVTCSDVFAVISAAFVAILGSGYRWHHLQDALNKIVDVDDKLLDVPTSERLRKVSIIVIVSSLVYIVVISSLDFVSWRAS

SAGKNNAHFGDKGPINYAPLYFMYIVVTVFEVQYALVLFNVGERFLKLNKSVANLTRSNMALEQLFRRYTHQPHHQQQQEQSMAFFSNEIGHIGRFRRVNNKISDFGPGAG

TETASKTAELIGRLIGLHGILCDSVKNVNKAYGGAVVVGTISCLIHLII

TPYFLYNEIFSDSISSWYVLTMQVFWTFFHVCRLLFLVQPCHMVSVEARKTGALVSQALASNWQPEAKKQLEIFSLQLLQ

RPVEFTACGLFFLDRGLVTSIAGAVTTYLVILVQFQNADETKGTKNLLQNATELLKNASSFKNITFKVR

>TchiGR64f1

MQQQADLEEDPYELKRIIVLDNDKNTMANGDAADGTDHNHHNHHHHVTSNGLISKNDVANGRIFSKAVVA

AANNNNNNAKKRQQVGSDESTLFAKVHHHNRTEARGALDTRKLSTNSDDQECFHRAISPILLLAQFFGIL

PINFIRAESITKLSFHKLGPRVIYSYCVICCIVFMTSVSFLHLFVTLNASSFQTRGGIADATAGAVFYGN

SLLGNFMFLRLCPRWIAVQYDWRAMERLLDKVKTKRPRLRWRFATIAAAILGLALVEHLLSMVNNTPASV

VGGNHSFEEFLAVYTQKSHGFIVKHVDYNFTLGLFIFFISKISTFTWNFTDVFIMMVSTGIAERYKVLNA

RLVGLTTSQLTVSDWHDLRECYASLSVLVKKIDDEISGIILLSFGNNIYFICLQLLNGLSPSGDDTSLVN

SIYFFGSFIFLIGRTISVTLLTARINDQCKVILPVLYNCPSANFCMEAQRLQQQIASDDVALTGFRFFSI

TRNFMLAVAGAIVTYEVVLLQFNIALQREEDFLEEQLLYANLDDDDD

>TchiGR64f2

MRPHRIDPVANSLTTIMNNNNINNNNNNNNNSNNNNGSIYDNNAEDNPADGKDYFYQPAWAIVNRRNVFNQHQHRRAPGGSAEIEEAVEQSNRREMHKLDTMPIEASTQP

SALSNSGGGGIDDLVDGQRSLHCALRPIIILAQVFAVFPISGVNSSDASTLEFTWRSPKIVYCCLSSLGSLVLTLFSIYRLATTSISSSKTSNLVFFFTAGITTILFLKLARQWPAFA

TTWQSMERELAT

RYTATTTTAQEGENNQRDDNPSGLEALSLSAKFKVLSTVVMSLALVEHSLSLLSGYVSALECASLRGHANIAATYFSLQF

PQIFTESNFALWKGALVQSINVLSTFSWNFMDLFLILVSVALTDQFKQLNRRLHSIRGKHGVAVKTMPEWWWAEARIDFN

RLASMTRRVDSQISDIVLLSFSTNLYFICIQLLNSFKPMPNAIQTIYFCFSFGFLLLRTAAVSLYAAAIYDESRLPAPVL

YGVCSSNYSTEVRRFLNQVTTDSISLTGMKFFSITRSLILTVAGTIVTYELVLVQFNAVQADHLQSDSNITKVCETHELT

DVVIDEF

>TpreGR28b1

MKCTGELVAAKFAKMFTALKLTELTFIRLLLRIFNVFGIAPLTLVQRGPQKEMRFVSSRLAVLYTYAFIAAIGVSNVMTV

DAIYTHRYEKKMSLFHIIDFCEIFLGTFVTTMILCTNCLKNRTFSAIATKMYRINESIGQLSAFEDGSGNKARRGADHCF

SIVGLVGFHALLTLIVLSSSAFYQENFVLFVSGATRNFVITWLCLQYAVIVNILQRSFSRINDLLRNLAGGRDAARINNN

PVKTIEMKNRYVIKNGHVDETTVPQLIAKASELHYALVRTIGEVTDFYDYTILGAVIYIFVCLVVFSYFILDYIIEKRIF

STVEYVNLFLWIVSFMSAFIALTMYVTKTLNEIDKTGMLVQELIRAKVNNQISIELKNFSSYLLHVKVNFTACGFITLNG SLVQSILGSITTYLVILMQFQLDTSSKMKCQHRNIESP

>TpreGR28b2

MITENSSSGVEKKARAKRSSTLLRYPSDLTCLKFLLLIFKSLGLATFSIVESNDKNQSRVDFVDSTSSLVYTLFLLGLIA

LTNCWGFLSVYNFRYKRTLKLFNAIDLLEVFAGIVNSLAIGLFYCWNQTRSAGLAARIYRLKLSGDSLRDRDRNSPLDAV

LLVGFELLLFLALLVTCVVFYDRMLYTISSTLRNLVVAWLFLQYALVVRSLLGVAARINSALRALPPRISSGTSCCSVLV

NAKCLQALLRLRRMHCSLVETYHEVAKFYSLVVLGSVMYAFLCFVVILYFLMNLLLERRLMLSAIEYVQLLLRFVGLMSS

LVALLIYVTKIGEEFDQTGILVHRLIQKTLNKDVLTELNDFSLYLLHARTNFTAYGFFTLDGSLIISIFGSIATYLVILV

QFQLEFRSDEAR

>TpreGR28b3

MSAFLLRLHYFFKIFGLSTMSVEKLSKFNRYRFATSRKDLAYNVALILGFLLIGSYYTRVTWLMDYEGRSLFEKTWEVFD

IVFAFSVSITLYVLYCARQRRIVRLADRFYALARSLAGNSDELSKAITRRTRRTFVTYLILYAIFTISAQPAAYINGYLD

HAVMAGLALNFILLTVLLQYCLVLICLVEMFAMANCHLEGIFRRSSHKSYIEPRFKSSSNFLNFELYKNQDSQFSYHRSQ

YFSLCDLSQDLSDFFGLPMLAVVSFIFFLIIFAIYYPARTVINQVVIMGYTTFFFYCQTWFGFLATGYLLVVLTNSTARI

GKEKERTAEIIIKWLAIVDNAATEKQVCVARDKSVMPCIVSNRVFTLQLDQFYKYLQSKNVQFSVFGLFKLDQSLLLSIV

SSTTTYLVIVLQFRETK

>TpreGR2a

MRSQERVRKESALYEVVCPAVYVSRAMGLAPYELTARGQLDGQARLAPSRLNCLYSLFWTSLYSYIVVTSLMRFAGSKRD

KPVLGVTETGKLLLNYAVSLVELSLCVLRRAEFAGVWNAIQAFDEAYDIGLDNNKGGGDRDQQQQQHHPLLRQAKHWLWLLLFGFVLAWVSVNQTGMYAFNESYVNNI

GYMLTYVGTCVAVLKFCGMAALLLQRFRHLNQLLQAKLDTNVNDSKVDYARETEDVDRIETSYNYLLAIGERLNEIYSLPLFLYLLNLFAHAVSNMYYFSIWTIVDRDYVS

QPRVLLCLVAWLVVYFGQMCL

IHIACHFVSAEANKMPIVLLDWRRRDITSNEYRSTLHYLNRKMRFNAAGCFYVNLQLLTSTFGHLTTYLVILLQIPSEGSE

>TpreGR64f

MRPHRIDPLANSLTTVMNNNNLNNNNINNNNNNNGSICDNNAEDSPADGKDYFYQPAWAIISRRNVFNQHQHQHHQRRAPGGSAEIQEVVEQQSNRREMHKLDTMPMEG

STQPSAPSNSGGGGLDDPVDDGQRSLHCALRPIIILAQVFAVFPISGVNSSDASTLEFTWRSPKIVYCCLSSLGSLVLTLFSIYRLATTSITSSKTSNLVFFFTAGITTILFLKLARQ

WPAFAATWQSMER ELATRYTRTTTTTTTNTAEEGENRGDDNPSGLDALSLSAKFKVLSTVVMSLALVEHSLSLLSGYVSALECASLRGHANTA

ATYFSLQFPQIFTESNFALWKGALVQFINVLSTFSWNFMDLFLILLSVALTDQFKQLNRRLHSIRGKHGVAVKTMPEWWW

AEARIDFNRLASMTRRVDSQISDIVLLSFSTNLYFICIQLLNSFKPMPNAIQTIYFCFSFGFLLLRTAAVSLYAAAIYDE

SRLPAPVLYGVCSSNYSTEVRRFLHQVTTDSISLTGMKFFSITRSLILTVAGTIVTYELVLVQFNAVQADHLQSDSNITK VCEVK

>TpreGR66a

MKREIKNIVEAYQPLLWLNRILGLAVFEVPIGRVWFFFSIFYALIRSLAYGFLLWYAFLLIPPMPLSYHSVMLMFRIIVY

INVVIASVTTILGIYNHKKTKKFFKNVSMIDATLECFEIEPVYYDDLKENLRLVLAWLTGVIIIFTCDLILIYAIFDHLG

HALAVVVAFEIPLQINSMIEVNFIVYIRTIGRRFEKLNELIKNITTHPSQNDLQHVKSLDLLSPKKTKKNKNKISVRSSS

YIKNKYDVEIILKMSRQLHLNLCTTSREVNQTLSKQISMQIASSFFILTGFGYCIYLVYHLPNVSLPRKIQLFCSLGAWI

VVIVWRMLQVVRTTVKVSSEAHKVSQIAHEIHVTKFQSKLVDDIHQLSLQVMQHPLFFSACGLIVLDFKYVRGFVGSVTT

YWMILIQNQPDMIRAANVLVSSIDDNSTLSTTAP

>TpreGR68a

MRLLPRTAVEKPLYLTYLVNWLCGIGVIEYPMGRPRPWLSFGYSGGCLVVYCTLAVLAAPELAHCFPAEMLLPTTILFYS

HIVLTVSTIVLGWLRSEGMRACILNLAATDSLMDRFEATSKNYSRVAPCRMLEIVARLAMVLFIMILSSYLFYEEDTPSR

TRVLVSVVLSYPVMLMFVADTTFINIVNCVTYRFRNLNDLLENMLSESNEFRRSDRSKRSFEEKYTKWNMNISESAKKDQ

WNNIKLAKKIHLALVNICQEADRSYGLQIILSSVVAFAIITGNMYVNYLVLVELHLPRQIMMKSIIGGAIWIAYYTLKIR

CFSCVCTRCVEQSVTIGDIVNKFYDDPVIQLETQAEIRDFNIQMIQQPLKFTACGFLTIDFTLVQGMTATITTYLMVMVQ

LRKSSTSYAMMNAINSTK

>TpreGR43a

MTARRFTAVRSNSDDCTHSAARDPTTNNEYSQIGRYGCLVHQSQRSEADRRWGSRSAKAAAATATAATPWTQEIDDGGDGGNKSDVFHTLAPVYHLSKICGLLPVKFKVN

KAGKYEGRLDVAEVVYGIVLVAALAGAQCYGLYRDLRNGWENSTRLSSETAITVTCSDVFAVISAAFVAILGSGYRWHHLQDALNKIVDVDDKLLDVPTSERLRRVSIIVIV

ASLVYIVVISSLDFVSWRASSAGKNNAHFGDKGPINYAPIYFMYIVVTVFEVQYALVLFNVGERFLKLNKSVANLTKSNMALEQLFRRFTHRHQQQEQSMAFFSNEIGHIGR

FRRANNNNKISDFGPGAGIGTEAPSKTAELIGRLIGLHGILCDSVKNINKAYGGAVVVGTISCLIHLIITPYFLYNEIFSDSISSWYVLTMQVFWTFFHVCRLLFLVQPCHMVSV

EARKTGTLVSQALASNWQPEAKKQLEIFSLQLLQRPVEFTACGLFFLDRGLVTSIAGAVTTYLVILVQFQNADETKGTKNMLQNATELLKNASSFKNITFKVR

>MmedGR64f

MLWLEITNDSSRNSAIEYSFTFRQNERPLTQRILSHIHRMKKKQFLGENSPLYTSVCPLV

YIIRGFGLVPYEFEDNQLVPCDSYMIISFFWLFMYTYIVSGFIIEFIESEKNRKKVLLYA

EQARTVFNFAVVISDLLLCMRTRKEITWIWNKIQDYDQAMRDLGYAKNEKSARMWVWFII

GGNTIIWAVVSSSGMNAFNEPWLHNVSFMIIYVGAAAAITKFSGLVMILGDRFKQLNEIA

RSSVQRSRWIHSYPIIDDKLIDCLHSELTVIGNNINKVYKFSLLLWCANLSFHSVCCGYF

VLNWLLDGNFRWKYIECLTAWFVASVYQLFLIHYSCHYTSSEANCMSYIMLGWKRWLYTH

DSKMEVETSIHLVNRQLHFSAAGCFYVNLPLLHSTAAILTTYMVILLQID

>MmedGR6

MIHPAGKSAQPSLIASEIKHKAVPCEPTFNTWNILKKDQVKPNRSGLMRNSDSLHVALRP

VITLAQCFALFPVNGINAPDASGLSFTWGSFKILYCALTLIMSAFMTVASIIRILSTKFH

TTKITTLVFSVTSCLTSLMFLKLARKWPKFAKSWEKIEGELTIRYNQPSKYSLVKRFKVV

TIIIVTLAFLEHALSLASGYISARECACLLGDNDVAAIYFKTQFPQVFNKTNYALWKGIV

VQCTNLLSTFSWNFMDLFLILLSTALTYHFNLLNKRLNNVKNKTMPEWWWAEARSDYNNL

ASLTRQVDSYVAHIVLLSFGTDLYFICIQLMYSFDRMTSVMRTIYLSYSFGFLLGRTTAV

SLTAASVHDESLLPAPVLYGVNGSSYSSEVIRFLTQVTTDNIGLTGMKFFSITRSFVLTV

AGTIVTYELVLIQFNNVQQVNHLNLTNVCEVK

>TjapGR46f

MRPHRIDPLANSLTTIMNNNNNNSNNGSNYENNCDDKQADGKDYFYQPAWAVVSRRNVFNGLGGGQHHRRASGGSAEIQEATEQQSNRREMLKMDTMPLEASNSDGGI

GQLVDSQRSLHCALRPIIILAQVFAVFPISGVNSSDASTLEFTWRSPKIVYCCLSSLGSLVLTLFSIYRLATTSITSSKTSNLVFFFTAGITTILFLKLARQWPAFAATWQSMEREL

ATRYTTSSSSAATTMTTAEIRRNSESGGGGGGGLQALSLAARFKVLSTVVMTLALGSFVHLFICIYFFSHNEDNDVKMRTILHALSRALVVAVVGLRERPGVRLAARPRQRR

RDLLLPAVSSSGQRFSFFFYDLFFSPHLHHTL

>TjapGR66a

MKREIKNIVEAYQPLLWLNRILGLAVIEAPIGRVWFFFSIFYASIRSFGYGLLLWYAFQLIPPMPPSYHSVMLMFRIIVYINVIIASVTTILGIYNHKKTKKFFKNVSMIDATLECF

EIEPVYYEDLKENLRLVLAWLIGVIIIFTCDVILIYGIFDNLGHALALVIAFEIPLQINSMIEVNFIVYIRTIGRRFEKLNELIKNITTHPSQNDLQHVKSLDLLSPKKTKKNKNKIS

VRSSSYIKNKFDVEIILKMSRQLHLNLCTTSREVNQTLSKQISMQIASSFFILTGFGYCIYLVYHLPNVSLSRKIQLFCSLGAWIVVIVWRMLQVVRTTVKVSSEAHKVSQIAH

EIHVTKFQSKLVDDIHQLSLQVMQHPLCFSACGLIVLDFKYVRGFVGSVTTYWMILIQNQPDMIRAANVLASSIDINDTLPTTVP

>TjapGR35

MQIAYNLFVSLTLISLYCLLLLDTPKNFHDNHLVFNRIFDTIHTTLAVSAACFILLVFSCRESRINDLARKLGELIVLDKQFSSDAKILTSIPCSTLLANILTTRTSGTDSKLVIYFG

LVYACNFIVTCALLQYSLTLRSIRRILLTVNRDLESMLELSAWSAASIRRDLSAKISKSRQSCSDACELAKQVAELYSLPMLFCITYVFVTLIFFAHFIMRPFVIDEASLTDFKLF

HLSLRILHYIVVLILLTKSASLLIKTVLSDPAMSEPKRAFIRNHESICVFQKNITSAIVNKSLEHFEENINDHQIVLKVRALASVDFEKRKTHCIHSCIIFPINFSAKTSTF

>TjapGR28b3

MAFSYFECIVMYVLYCTRQREIVRLANKFYAIAQSVAGNSDKLLRAILRRAKIIFVTHLVLFSIFTLSVQPLVDPEGSLDHTVLTCLIIDFILMSVILQYCLLLICLIEMFATINRR

LEGLSRKSSHKSIDARFKLSSHFALETNESQNSQFSYHRSQYFSLCDLSQELSDFFGLPMLMIVSFTFFVIIFSIYYPARKLINKVEIAGYDTLLSYFRTWFWFIVIGYLFVVLTN

STVGIGKEKERTAEIIIKWSAIVDNTATEKQLDQFYKYLQSKKVQFGVFGLFKLDQSLLLSIVSSTTTYLAIILQFRETN

>TjapGR43a

MYIVVTVFEVQYALVLFNVGERFLKLNKSVANLTRCNLALEQLFRRYTHQQQQQEQSMAFFSNEIGHAGRFRRANKVSDFGPVGDSPSKTAELIGRLIGLHGILCDSVKNVNKAYGGAVVVGTISCLIHLIITPYFLYNEIFSDSISSWYVLTMQVFWTFFHVCRLLFLVQPCYMVSVEARRTGALVSQALASNWNPEAKKQLEIFSLQLLQRPVEFTACGLFFL

DRGLVTSIAGAVTTYLVILVQFQNADETKGTKNLLQNATELLKNASTFKNITFKI

>TjapGR2a

MRSQVRVRKESALYEVVCPAIYVSRVMGLAPYKLTARGQADGRARFAPSGLNCLYSLFWASLYSYIVVMALMRFAGSKRDKPVLGVTESGKLLLNYFVSLVELSLCVLRRA

DFAVVWNAIQAFDEAYDIGLKNGEHKKQDHPLLRQAKLWLWVLLFGFVLAWVSVNQTGMYAFNESYVNNIGYMLTYVGTCVAVLKFCGMAALLLQRFRYLNQLLTDKL

AKDWTKPEDYARETEEVEVIQMSFGRASTKLT

>TjapGR68a

MLSESHEFSRSDRTQISFEEKYSKWNMNISESAKKDQSNNIKLAKKIHLGLINICQEADRSYGWQIILTSVAAFAIITGNIYVNYLVLVELHLPRTIMIKSIIGGIIWIAYYTSKIRC

FSSCCTYCVEQSVSIGDIVNKFYDDPVIQLETQAEIRDFNIQMIQQPLKFTACGFITIDFTLVQGMTATITTYLMVMVQLRKSSTAIAMMNGINSTK

>TjapGR28b2

MLLRYPSSLTRLKFLLLIFKSLGLATFSIVQSDNDDDDDDDVKRQSSVVFVGSSASLYYTLSLIGLIALTNCWGFLSVYNWRYKRTLKLFNVIDLLEVFAGIVNSLAIGSFYCW

NRQRSADLAARVYRLILGAARHLRRLLRPNALHGQLISTQSRGHLAIFAVWSGGQDIARRRSCHQRRASGAPSHINFVPEPIQQRPLERQVSSGAA

>RcyaGR28b1

MMHVSRGVFDVETTVRKLSSRFRRPPQASRPEWPVISAARPMFYLLRFFGLAPFEISDDR

FIPGSYAAMYSFLWIVVYIYVVYKVLVDNMTKRESVMIETIQTAKVIFNCSIAILNLLIA

VWARKEFIRVLNVVKNFDSRIRDLGHARKEGVTKVWVWSTGIFTAFLWVTVNRTGMAAFTESWVYNIAYIFNYLVNSLSTIKFSSTVLLLGQRFKLLNEIANRNKASTTVGQKSTIVDSK

VIQQLHNSLMNAGESLGSQYSWPLLLWLMNLCVHSVSNLYFLVNWLMVTPEWASTRWPLVHCLTWWLVAFVAQLLLLHIACHFTSTEANSIGSIMITRKSLASSRNYRVESSLHLINRRL

NFSAAGCFYVNLPLLSSITAILTTYLALLMQYQG*

>RcyaGR43a

VMMMEIQIALAAYSLGQRFVRLNNSLGNMLKTERLATFFPNDLAASDFSEHGQFRAVIRG

DLRGEPLFRIRKISDIELIRNGTSSSAEMIYDLVTVHSSLSDTVLLINSAFGLPALIAVL

TCLLHLIITPYFLILEANGEHNELFLAVQLMWCIAHFGRLLIIVQPCYAASVQAKGTSVL

VSQLLSVNWEPDVRKQLEIFSLQLLHRPLEFSACGLCSLDRSLVTSIAGAVTTYLVILIQ

FQKDDDTKETNTILKNATMLLKNATTLRNTTLLKQF*

>RcyaGR23a

MKIFSTPPVCILPWMVRVIVYSFRMIGLAPVSLHYHVELPVIDPGDSSVRGFVCSKMGLF

YNLSLLTMTLFVASAGISDLSSWEYSNKSAITQTVDLVITIFGITTTCFIVVNWVFAQKR

ATVIFNRLLGVHYLLSGPKKQFSDKKNYVTLALHMIAYAILWIAVTVSGAIWLKSISTVF

LIVPPTFIVYSFILEYA

>RcyaGR68a1

FGKEAHGRRMTHTLRNARNIYRDLCSVARNFNEAFAVQMLLSLSMTLATGIALLFLMYSA

LTTSAEITVHIALHVLNFFLIFCTYVIRTIFVIAACSKASTEAQRTGDLIHEFTSLTTRI

EVKEEICAFSIEIMHDPLRFTACGFFFLDYKIIRAMIGTAATYLVFIIQIPHASIAMRG*

>RcyaGR28a2

FNWTLLIVLTHVYPVTSLALNVTRIKKEAGLTKRIVNKLLLATRKGSEVQTELEQFSREL

LHEDVDVFTAYGLFSLDSTLLPSVLGNTVTYFIILIQLRSPGDN*

>RcyaGR28b2

SLTIVKFSGIALLVGQRFRHLNNVAERGEGSKNVGRK

QNAIEFKVIQQLHNNLMNACESLNSQYSWPLLLWVINLCVHSVTNLYFLIDRLVAATADR

ISTQWIFVFCIILWLVSFTAQIILLHIACHFTSREANRMGSILIGWQSASGGRNYTVESS

LHLVHRRLNFSAAGCFYVNLSLLRSITAILTTYLVLLMQL*

>RcyaGR2

QIARCNRVADPWEQSMINILQDIRKIRRELFTAARKINDAFGVQIVLSMSVSLFAITTLL

FNIYDSTL

>RcyaGR68a2

DPSAFGPTPRKTEENNSRQDVKSDLETYRRTYRTIAGIIDSINSIYGFELLMIVIYNQIR

CLLLAFSYNSVLFVSSITDLEGKVYKMVVKPILGCLWCFVKVSVIFHGFEIVVSEVQTTR

NYVASIDASEIDKESKIELLEFLEEIDGRKIRFTASNIFSLDYSTLYVIVTQTFTYIIIS

VQYSSPNLYDD*

>RcyaGR28b3

TLASREAARTGVLIHEIGLKNNQLTVKRLSGINSGNRRSLSYHSETKSYDGSSAVQNEIG

YFSSQLEQNPVAFTACNFFVFNNALLQSVSKKSFDIYHE*

>RcyaGR5a

MAIEMTTSGNCIDNDNYRSKNTTNSRQVWPVINRRTVNNNDNSRNENNNLTFKLNKSRTYKIGVVKSRSKILLKNSSSEIKRKKLSEQFQNPESFHCAIGKILSVAQCFGLLPVSGVLSS

SSRGLNFRRRSFRTIYATTLSLVMIIVAVSSLIHMINSIDTRTFEIKDGIGAATSGAVFY

GNSVIASLTFLWLAPRWAPLQNEWRAMELLLDRWGRPKLRRKFSLITAIVLLCALVEHVL

SVMKNTPSYTRRNGWSSNSSSFANFIHEYSINSHNFIVKLWDYNIGIGIFLFVVSKMATF

TWNFTDLFVMLISTGLSEAFEVLNKRMTSESSASPTISEWKLLRENYAALSGLVKRVDND

VSPIVLLSFANNLYFICLQLLNGLSPDEDGILSSVYFFGSFIFLVARTVGVTLFAARIND

RSRIALPVLYTCPAKTYCIETQRLEHQLATDEIALSGLRFFSITRNFMLAVAGAIVTYEV

VLLQFNLAMNHK*

>RcyaGR28a3

FLLARSKVVILINDLGTLKMKLKNLGIKEDYGNVFENNFLIALTINIVTLISMIVFYVFQFNVHQTYYFLIYSTFRKLIDTNTIIIFAVALLYIKQCFTLVNKKL

>Rcya28b

GENFFFSHPLTWVTWIWPYVIRIASTCLFADVVLVLKHRFTTLNKHLRKMIEESKHSFPE

VN*

>RcyaGR68a3

RIYNVCERAERAIFQDKKTMENLLALSRSRLSHELVHEVEVFLTQVQLSPIQFKAGLNTR

VNIAQFFSILVSIFTYLIILTQFSGLS*

>RcyaGR28b5

WLMGTGICRPGEWKKVTILIKFFHFAMCSSNVAYGIKDYFTIGSVLKGDTYKAIYYMNKA

VIYITSYHCVIFGL

>RcyaGR28a4

QVPWTG-PHRSASNFFLLAKSNESNKLLPIVVQAERTGLVIHKLLTRVRNEEIQVALERFSI

QLIQEKHNFTACGFFSLDLTLMRSIFGTTLTYLVIMIQFMLPTTNTSKTDTPSYLSQ

Supplementary Data S5. The amino acid sequences of ionotropic receptors (IRs) from 15 Hymenoptera species.

>BdioIR8a

MKFYLWLMLLLTFGANGIVSQAPVTLLFVIEQPDAELMSNLNDVVAEAESQFGANLVKLDVKLVQVDREFVDENYERVCAELYKGITMILDMTWTGWDKLRDLARDFNII

YKRGDTTISPYVQAVDETMMYKNSTDAALIFENEKELNQTLYYLIGNSIIRLVVIDSLTAQTVERINNMRPLPSYYVIYARTQQMEELFRTALEGGLVRRDKVWYLVFTDNN

YADFSYFKQPNQLKVSVSVFTMKHEVCCHLLYQQSPCVCPPDFRIFQHYFRRLVQLVVETLSELQAINQLQEPQTGQCQNKNATESTASQSNGNNSTLSDFDRRLLNKIANN

DTFEYVPKRTLLTYKAAADLKLLHAHGELETIGTWSRETSIQPLPNKTIEAARRYFRVGTTEAIPWTYKKIDPSTKQVERDSEGEIVYEGYCIDLIKKLSELMDFEYDLVIPKE

GSFGQKVNGQWDGLVGDLAKGQTDIAVSALTMTSEREEVIDFVAPYFEQSGILIVMRKPVRKASLFKFMTVLRLEVWLSIVGALTLTGIMIWVLDKYSPYSARNNKHMYPY

PCREFTLKESFWFALTSFTPQGGGEAPKALSSRTLVAAYWLFVVLMLATFTANLAAFLTVERMQSPVQSLEQLARQSRINYTVLENSTIHQYFKNMKQAEEKLYQVWKEITL

NSSSDQVEYRVWDYPIKEQYGHILQAISQVGPVATVEEGFEKVEASENAEFAFIHDSSEIKYQVTLNCNLTEVGEVFAEQPYAIAVQQGSHLQEEISRKILDLQKDRHFEQLSS

KYWNQSRKGSCANADDNEGITLESLGGVFIATLFGLALAMLTLAGEVIYYRRRNARQAQDQADSKRNSGGAGKPNLINVNDNDQMIIQKLTAKLQLKPAPPVAFDASHKS

SPNINTTTKPRVSHISVYPRPFPFKE

>BdioIR21a.1

MRTCGWLLAPLALALCASARQAFLREERARPSSDSLARLLRHLAREHLHDCVLSLVYDGSYERGRPLDFREYFGALPLVFTQESVEASAGAERRQSKCANYVLFVADMGV

ARGVLARKIGVASKIVVVSAATPWRVKDFLKSDVAGRYANLLVVCRSTSRKSGHGVYLLYTNELYADGSGASQPLLLASWLNGSLSRPSVNLFYDKLQKGFMGHRLLVST

VENPPFTIRRSKSSQDEAQWDGLEVRVLQLAGSHLNFSVEFTEPRSQLPASLNAAKADVAQGLSSMAIGGIYQTIDLTEAFDATAPHYEDCAAFISLASTALPKYRAVLGPFQP

AVWIMLIVAYFALIVPLSFNSKYSVLSLLRHPSGLNNMFWFVFSTYTNSFVVKSPLLGYGIAQNSITLLMGIYWIFTIIVTACYTGSIVAFITLPVFPAAVESAEDLAYYRYRLGT

LDHNGWEERFNASEMEEPALRRLFRRLEHVPSLLEGVQNASRAYFWPYAFLASRTALDYLVQTDFAPSHSTKRALMHVSAECFVRYQVVQLFPRESLYTDKMSSFVVRAH

EHGLLERIVGEVDWEVQRVASMSGKKITKGLSQAVVLEDRVLSVEDTQGMFLILGSGVLAALLALTCENLNSRLRRRRALAKRGPEHASAHWNHRAPTPQSWIADHQRDN

PHPELRLRNSRGSV

>BdioIR21a.2

MLLIIAKILNFRPDFYLPDNIQNERWGNLQSDTYTGLFGEAKDGNAEFYLGDIYYNLRHLQILDLSWPYNAECLTFLTLESLTENSWKLLILPFRLYGWIAVILTLLLAGAVFL

LFAYIYENHINLEDKTAPTTIFTRRFVNDKWFLFIEKKPIVEEWKGLYLFADVQNSFLYTYSMLLQVSLPMLPNAWSIRIFIGWWWIYTILITVTYKASMTASLANSVDR

>BdioIR25a

MCAILLWLLVVAGGGGGGYVAAQTRDVANRPVNVFVINDVGNDVANKSLTNSLRALKEQNADNLGKVYVAQVNVTDSKETLNVICETWKSAINAGSANLPDFVLDTTTY

GVGAETVNRFTALLGIPTLSAQFGQEGDLLGWREISEDQKQYLVQVMNPADLMPEVVREQCSHFNISNAAILFDESFVMDHKYKSLLLNVPTRHVIVPTKPAGTALREQISR

LRDLDIVNFFVLGSEATISAALQAASSLDFTDHRYGWFGVNLNEDFTAQCPDCPRAKLMIFKPAPSPSQQQLSELTSKGALPKPLIQSAFYYDLARIGVLGAKAAIEAGEWRT

TTRTYRDCDGVDENSTVPARNFDFRKRLQQVTSNAANGFVPTYASFAWGKNGESQAKFEVNGVAIEMKDSRVTKEDTVENWQAGIDVPLTIKNEELAKNQTAVTSYRVVT

VIKPPFVMYNNNTGKWSGYCIELLDKIRDHVPFEYTIEEVADKEYGNMDEQGNWNGMVKVLKDKKADIGLGALAVMAERENVIDYTVPYYDLVGISILRKKPRIQTSLFK

FLTVLETDVWLCILGAYFFTSLLMWVFDKFSPYSYQNNREKYKNDDEKREFTLKECLWFCMTSLTPQGGGEAPKNLSGRLVAATWWLFGFIIIASYTANLAAFLTVSRLEAP

IESLEDLSKQYKIQYAPVLNSSEYRYFERMAAIEKRFYEIWKDMSLNDSLTDVERSKLAVWDYPVSDKYTKIFQTMQDAGFPKSKEEAIERVRKSTPTEFAFIGDATDIKYLV

MTNCEFTIIGEEFSRKPYAIAVQQGSPLKDQFNNAILLMLNRRELEKLKDTWWNKNPERRSCTKEDDQSDGISIQNIGGVFIVIFVGIGLACVTLIFEYYYYRYRPQARMKHQ

REQQQQQMNQRNNNTPKNPVATIGAMKFNLRPAPTQNLEPINHRF

>BdioIR25a.3

MKNMTQLRVRTIIKPPFVMYDEATNRFEGILPELMHELGIRLSIDFNVSIQEDGRYGHLDENTGEWDGVIGELTSGRADVGLAAFSVMAERMAVVDFSEPVYKPTGISVLML

KTQPITSFFRFLTILEAEVWWCIVGAYLFTSFLVWIFDTWSPYSYQNNKEKYKDDSEKRIFTLKESLWFCLTSLTPQGGGEAPKNLSGRLVAATWWLFGFIIVASYTANLAAFF

TITKYEKTIESFDDLIGQYRYSYTVIRNSTTHTYFRRMNDLEYIFYEKWKDMTLNDSLTPYERAQLAVWEYPLSDKFIKIYSAIEHNNMVNNFSEALAKLNEKDSRFSLITEA

TDVQYMALTDCRFREIGPEFSKKPLAIALPKGSVWTGKFNEVMMELNKEGWMYWANRRWWQENPDRVTCNDYDVNTGITIENIGGVFVVIGIGIITATCTLIYEFFYFTFW

REKMERFYDRNLKKLKSIISLKIRVKSVSGKALNHP

>BdioIR75a.1

MLNIFRIIKILKVVLITFLFLPVDYCDIDVNNAFIAEYFLFRAPSTVLAFTCNQDDSNIQLFKKFSDVKLQSAIWKLENTTELFSFARMLYQKIGIFIDLRCQQPENVKATFNEATNYKMFDELYYWLILGSSLDQSLSLMNDDSFGLSTDLVIAVFENNHFYLYDVYNPCKKRGGTLKVSRVGSWDETNGLTMPNEMRKLRRWNLNGMKLKISGIVTNKPSNMS

VAEYLLDNNFRLSDRMTRIAYALWLHIAYKFNFTIEFIESNNTNEANENDPVVIALMKDEIDASGTAEIMTTERVDFLKAVYPTIPYRTSFIFRSTSSDRLSVRDIFLPLSSTVWY

LTLALSILSVNALALLSVFAKEDFFEYYLRSIIINVGAFCQQGTEFSSNTLSGRIAILHILLFYLLLYNYYLASAVSNRLSEPIIFINDSLHELRNKDFEYASEPMLDFDQHMKSPD

WETRSFYTSRWSKIPESQRFLPPEKGMSLVLKGGFAYHTRPEISYPYVERHFDHRKICEVQEVHLIRPMHLSIFVNINSSFIEMFKSG

>BdioIR75a.10

MERFSTRMIFFFTLLFSLLIYCYYSACVVSARLDEPIYKINDSLVEMGKIPLKMASERIAYLEYLFKAPVWEIQQFYANHWLKLPESERLMEPENAMALVQKGGFTYHV

HPDVAYTLIDKFYNNREICELMEVHLAKPQNTMFGVNNNCTYSELVRVGLTKISEVGLRRRQLLKWQYRKPRCRHDILSASSVDIYEFAPHLILLLIGLLLGVFIYFFETKGN

RKGNHFYTRPCFRNKRLILRKKLFVRRTIV

>BdioIR75a.2

MMKKNEWPSFLNSIHTRVGVVIDFQCPMFEDVQILLDKASDYGMFDERFNWLIIATDLRQILKIINDKPFGLSVDFAIAIKTRYEYTLYDVYSMCRNCKSSLNITLIGTWNRK

HGFHFIAELHKPDRWNFHGSKLKLSGLISQKPENTTTVEFLQDYNSKHLEPTAKLAYALWVPLSEMYNFTIIYQERAIWKKGDKNGPVMNALLAGEADATGTPLTMTLERL

RLAYPVYPALPFRSCFFFRSVSSSQINYKVILEPFTEKVWHYIIVFGFFSINVMVILSAFQDIKLGHKYLNAIILNIGAFCQQGVDFKNDHLSGRIALLFIFVFNLLLNNYYMASL

VSSRLRNYHSKLNDSLNQLTKVNLDFAAEKSLYFDFYMKRNDWETKSFFTNVWTKIPDNKKFLDPNSGMSLVAKGGFAYHTLPETAYPHIERFFDDRKICDMSEVHLVRPT

QLSFFISKNSSFGEMMKCGFAKLTEEGVRNREIRRWLARKPICRIDVLTTEKVTFDETAPLILFMFLSMTLSVTLLVVEKIYYDKILNRLISKILRYLRSI

>BdioIR75a.3

MKYGEILRPFASEIWNLMTFTLIICGVTLFVTLSFEGTDDSLMRCSNSLLITIGAICQQGTNMVLNQISSRITFLCIMVYSYLMYNYYSTCVVSARLSEPITTINDSLNELFKTG

LKVASEPLLYFDFFIKENKWETRMFYTKRWLTTPEQERFMHPDRGMQLVREGSHAYHTHPDVGYPYINRFYTNRQICELTEVNLARLTYATIAVTYNSTMVELMKIGFARLS

EYGIRRRQLNWLTAVKPHCQQDILVATSITMNEFAPHLVVLAIGAVIAVTTCAFEKYIYEHYHHPEKFSRLHDLLRRKFHDASICSAELKVTDIGDT

>BdioIR75a.4

MVLLLSLSMIVLLAIVRYDWNYPEIMNVYHTFLLIIGSLCQQGTDLRMKNLSTRIAYLSLLIFGLLIYNYYSAGVVSARLNEPIVRINDSLNELGKLPLKLASEFMVYFDFFIK

RTDWETRTFYTQRWELVPESDRFMLPEKAMQLVQTGQYAYHAHPEVAYPFVDRFYDNHEICELTEVHLARPTWSTFALTFNSTIVEVVRIG

>BdioIR75a.5

MIFSILCYTYYSASVVSTRLNEPIFKINDSLNELGKLELKMSSEPMIYFEFIFNRITEWDKRVFYEDRWMKIPESEQFTYPENAIPLVREGGYAYHTHPEVSYPIIEKTFSFREICE

LMEVHPLVPAYSTLSVNYNSTFIELSKIGLSRMTEVGIRNRQVQRWTSRKPLCRKDVINVSSTDIYEFAPHLILLVMGMIMAGTIFTFEFIFANYWSSRDRYL

>BdioIR75a.6

MGFFMPFTVTILLIAMHQDFHESNVVIFSNAFLVTIGSLCQQCTDLRIARISTRIAFLFVMIFSLLIFNYYSASVVSARLDEPIFKINDSLIQLGKLRMKMASEDMVYLEFFLKK

PDWETKMFYENYWKPTVPDQEWFVEPEVGMRLVKKGGFAYHTHAEIAYILIEKLFDHREVCELMEVHMGGPFYTSFGLHLNSTVVEIGRVGMIRIAETGLTIRQIHRWQFR

KPRCRKDILSAESITIYEFAPHLIFLGIGAILAVAIFALEIYIKKRVHLLVRSRAHAIMEIIASRVKDEIADSFHG

>BdioIR75a.7 MYNYYSAMVVSARLDEPIFKINDSLNEMMKLHLKWSSERMPYIQNFFKAQFWEIKIFQKEVWDKVKDEEKFMDPEAGMRLVQKGGFAYHIHPDVGYGIVSRLFDNREIC

DLTEVHFSRPKMTQFAVTNNSTFTELMRIGLTKISETGLEIQQLQRRQYKKPVCRKDILSATSVDIYEFAPHLILMMIGVLFAFIIYAVEIVNINRRTILKKIDKRIEIEITQSWEML

T

>BdioIR75a.8

MYFEFAVSLLFASTLFVIFRTCFIFRNPQPTSIKMNEIFRPFANSIWVLLCINIVMVIFTFNMALSYDCNESQIMRMSNSCIMVVGALCQQGSDIKMTRVSTRIIFIFVMTTSLLLY

NYYSACVVSARLDEPIYKINDSLVELGKMNLRMASEKIVYIEYFFRLPYWETRIFHRDYWSKIPEPRRYMDPEIGVPLVQEGGFAYHAHPEAVYPLIDKLYDNREICELMEVH

LFRPAYTMFAVTNNCTFTEVMRVGYDVYFALKYHQKYLLFNQDFFSGYRDSQKPDSAIENSKNGNIKNQDAVETF

>BdioIR75a.9

MVQVYFNLPCSCFFHMKEFQYIDSILFFHYPLFLDDISLIKKFSEKGLRATFRKFDNKSNINRLASNLYYRIGILLDTRCCSMKNVAVILDNATNCRMFDELYYWLILGSNMSN

ILNVINDAAFGISTDLVIAISTGNGSYALHDAFNVFKGRGGILNITYYGNWNTSKGLAIKAGQIKSIARGDLRGLPLKAMFFQSPYKPLNMSLPDYYRNTQNGTKDGRSKFG

FWILSHLAEMYNFTIEPVETRKWIANDTIGPLIRAMMTHEIDLTGTPSNINSKRAHLAKFLHQDWPFRTCFIFRNPQPQNIKIGEILRPFADSVWFLMCLTIGMGIIILSLALRHD

LHEVDFISIANSFTMTIGAVCQQATCVDMQLISTRIAFLFIMIFSLVIYDYYSALVVSARLDEPIYKINDSLVEMAKMRLPMASERMVYLENFWKQPYWETQIFYQNYWLQW

PEEKRFMEPELALELVRKGGFSYHVHPDVAYTIIEKTFDNREICELNEVHLGKLVNSMFGVNNNCTYAELVRVGLTKISEVGIRNRQILKWQYRKPRCRQDVLSASSVDMFE

FAPHLVLLAIGFILAFLVYVLETIGSKWTIESRSDMCNKKIKLILRKKVHKRVHNLFF

>BdioIR93a

MSKYTMFLLLIFLQRFGRIDGHNDFPSLITANATMAVIVEKGFFDDKDDYRDALMDIADVVTGTIKNNMKQGGIDIFVFENTNVDLGRDYTVLLSVATCQTTWNLFKRAQK

EKLVHLAITGPDCPRLLEGDGISLPLIDPGGELAQIFLDLRMSEALAWAKVNFLHDDTFDSDTISRVMKALSVELPNKKLLLSTRAIFSVQYDKSDTVMKQRIHKMLGGFQV

DELGSCFMVFVTVDMVPAMMEVAKSLRMVHPASQWLYVISDGTSHKAANVTMFLDLLVEGENVAFVYNASSLGPECNMGLTCHVKEFARALAISLESSLSTELELYDSVT

EEEFEVVRLSKAERKDEIIKSMNRELTEQRASTTNTCGECTSWKIASAITWGASFVVNESKRHRKANKTDTAKRSIGELINSGTWSPTPGVRMNEELFPHIAHKFRGRSLPVT

TFHNPPWQVVSLTDTGQPEFGGLVFNILDYLSQKLNFTYTVHLPSSQDTLSKLRPDNTTAKAQKAIKFEVSEAAISVARKVPTEVIELVRDSRVFLAAAAMTVNENTKNVNL

TYMIAQQTYSLLSAKPKSLSRALLFMAPFTPETWACLTSSLFIVGPFLYLMIKMSPVPIAPDDKNGLKTTWQCTWYVYGALLQQGGMSLPKADSARLVVGTWWIVVMVVV

ATYSGNLIAFLTFPRMDEPIDTVDDLVARKSEFTWAYPNGSAVENYLVAAAQNTEKYKEILDAAQQEDPTDPKRALAKVKDGQRVLIDWRTSEAFLMRLDLMDTGVCNFH

VGTEDFLHENMGLLVAADSPYLELINSA

>BdioIR75b

MMMQANDLRVYDEMHSWLIFADGDLTKTVKKMDKLNGFGTSTDSVIAVRIVDGYELFDVYNPWKEGGAKINISRFGTWNRSSRLHITLTQGQFRRRCNLHGLVMRANFF

RVKFSDISNSYTRFPIQDVIFIAE

>BdioIR75c

MKIFAIIICIIGLEVFADRSDKFVVDYFVYKKVTSVVTLNCNAYKDNLSLVKQLNYVGIKTSAAKVNEDLNIYSLAKTEYHKVGVFVNGQCHKNGNLSSALYEAGYDRLYG

ELHHWLLVISECDDWANLVHDNYFDLSTDLVVALAKNGYEMYDIYNPGKSRNFKLNVTFMGTWTAGDGLKISLTQSKYARRANLHGMVWRVAYLTSKYKPTSVLLENHLRDFENTGTKDNLAKFGYSVVSHLAEMHNAT

>BdioIR75d

MYENLHYWFILAQNLTQVVQYIDDRAFGVSTDLVIAISLDFNNYELYDVFNFCKDRGGVLNITFLGYWKQDTSFDISLKESKFVRRSNLHGLVLRAAFFQTVYRPPGMPLEE

YYEDHAHAQRDGLSKFGFHLMTHLSELFNFNLKLHQAKQWEIGDRIGPIVRALNSSDADLTGSPLTMNIPRTHWVKFVHQDWPFRFRINMNKVI

>BdioIR75e

MQERCTNNPQDHVAKIHVSYLEMYFILILANIFLVHAHGAHDSDFIVDYFFNKKVINVIGFTCYDLLGDVSLIRSLNKKHITASTYKLNQSKIHLLTRATYWKIGILVDTRCYN

TADITLAFNEATEYRLFDELRSWLILGNNLKNVLNLVNDKAFGISTDFVIATLVHPSSCTFHDVYNIFKERGSALNVTFYGNWNSIVGLNVSLTQSKFRRRANFHRLVIKAMY

YKSLFKAADTPLEEYYEDFEHKTRDSQSKFSYHVLSHLSDIYNFSLHSRESPLWVKGDKVGPIERALTNRDIDITGTPISFTTRRLLVMKYVHQDWPFRY

>BdioIR75u

MRTLYRIWLLIALLHAGVKFCESANNADELTELLVQLKSTGISSFSTVTIFGCSDDNYKLKIAGELSKAFISNNMHDLDSDQFAWKELIASFPAYQRLLILDLDCPHSESFLLEA

KAEMMFVAPNKWLMTTHDCPNTDCVLSELVDLDKKLLPDSEVLIWLSQSQRLISVYKVSVESGRDWQIEERTQYLHNHTLLLEDNSAIISKRRSDLQRAHLKSSLVLTDYD

SLKHLDDYQNREIDTISKCNYPWTKFLTSMLNATISFKLTPTWGYPRANGSWDGMTGMMQRGEIEFGASHSFVTRERLKVVHYLAGLTTPSHSRFVFRRPALSSIANLFALP

FRGSVWLAVLALALLFGFLLYPAMMLEWRRHQYSMTEPRLGDETLVVIGALSQQGFWYEARAASTRVLVLAGLLGFLSLHAAYAANIVALLQSTSSSIKSLKDLLVSPLDFG

VHDTVFNRYYFKSLGNLEPKIRGAIAEKSEWLDLDEGVRRLRGGNFALHAVLGWAYKLVHESFEEDEKCDFEEIDFLNVFEPHMVVAKFSPYKELLRVKALRIRETGMRTR

ETSRLYSRRPRCDAAASSRRFISVGFEECKGAFYALGYGLLVAVGLFVAEMVYRYLPVWICSDRLKQ

>BdioIR1

MYTFNPFTIFAPEPWELVKIYQQENGHPIALFRLAQKRDVRMALKFDKTLTLGGYPIKLVAKHNPPFTTYDDKNKKFIGLGGILFQVMMEKLDVRAEWHAYSGGPR

>BdioIR2

MSYFFIPSMYFQVVFLFLLVKDVYAVIENNLIVDYFVQEQVSSVIGYSCNIFKDDLLLFKKFSSHGLTSALFKINDETNRYSLTLNQYSYNLSLIYRKIGIFFDTRCYSTENISAV

YSEVRYMIFNK

>DmelIR7a

MFHHLWLLMGLRSLAMGALHPPQPEAMTPLVAAALEILAEQVSPSQSTLAVMDLTQDAEHRDERQEQLMTIILRSVGSEMALRTFQKPPAEVPASFVVFLVNSAQAFNTLG

FHFTDIHSTREFNFLILLTHRMSSRAERLQVLRDISRTCVRFHTSNVILLTEKRDGVVLVYAYRLLNMDCDLSVNLELIDIYKNGLFRHGHEARSFNRVLSLSGCPLQVSWYPL

PPFVSFIGNSSDPEERAQIWRLTGIDGELIKLLASIFDFRILLEEPCNKCLSPDIKDDCSGCFDQVIISNSSILIGAMSGSHQHRSHFSFTSSYHQSSLVFIMHMSSQFGAVAQLAVP

FTVIVWLALVVSSLLLVLVLWMRNRLVCGRSDLASHALQVLTTLMGNPLEARSLPRSSRLRILYAGWLLLVLVLRVVYQGKLFDSFRLPYHKPLPTEISELIRSNYTLINQEYL

DYYPRELTVLTRNGSKDRFDYIQGLGKEGKFTTTSLIATMEYYNMMHWSTSRLTHIKEHIFLYQMVIYLRRHSLLKFAFDRKIKQLLSAGIIGYFVREFDACQYRKPFEEDYE

VTPIPLDSFCGLYYISLIWLSAAVVAFILELLSQRIVWLRRIFE

>DmelIR7b

MKYWLYILSCCSLVASTMESSSDWDLAEALAQVVANSEMGRFKTLYIYTHTNSQSTGGHLEELLDQVLMIVPNNLQARRLLLQQSMEYKPYVHAVLALVDGLPSLSAIYARIRATQDLSHTLIYMSMPTDAYGEEMQATLRFLWRLSVLNVGVVLRPPGDHILMVSYFPFSALHGCQVISANVVNRYQVGTKRWASQDYFPSKLGNFYGCLLTCATWEDMP

YLVWRPDGSGSFVGIEGALLQFMAENLNFTVGLYWMNKEEVLATFDESGRIFDEIFGHHADFSLGGFHFKPSAGSEIPYSQSTYYFMSHIMLVTNLQSAYSAYEKLSFPFTPL

LWRAIGLVLILACLLLMLLVRWRHHHELPRNPYYELLVLTMGGNLEDRWVPQRFPSRLVLLTWLFATLVLRSGYQSGMYQLLRQDTQRNPPQTISEVLAQHFTIQLAEVNE

ARILASLPELRPEQLVYLEGSELQSFPALAQQSGSSARVAILTPYEYFGYFRKVHPMSRRLHLVRERIYTQQLAFYVRRHSHLVGVLNKQIQHAHTHGFLEHWTRQYVSAVD

EKDESVARIASTSYSTLDGIDGDPSLSESEEDQQVAPVRQNVLSMRELAALFWLILWANLGAVVVFVLELLLPRIKLRKILRKMKSDIKKQISKLVRK

>DmelIR7d

MDIRCVVALLLGLCKVQAVVWPHQHLLEEQLASQISATLQKIFINGLAVYNFGVFISTSYEEMDRDRVILVHQVLNRNLYPPNFPVAVVLASKMNRKITAQVFTQLLFVQNA

EQAIAIAEGVNRNGLCVIVLLTSQPERPIMTKIFTYFMQERYNINVVILVPRLHGVQAFNVRPYTPTSCSSLEPVEIDIKDGDLWDVFPRRLKNLHGCPLSVIVWDIPPYMRIN

WKSSDPMDGLDGLDGLLLRIVARKMNFTLKLIPNEPNGLIGGSSFMNGTFTGAYKMLRERRANITIGCAACTPERSTFLEATSPYSQMSYIIVLQARGGYSIYEVMLFPFEKY

TWLLLSTILGLHWIVGSRWRMPSPILAGWMLWIFVIRASYEASVFNFIQNSPVKPSPRTLDQALSGGFRFITDHASYRMTLKIPSFQGKTLISAGQPVDVFDALLKAPWKTGA

FTSRAFLADHLVRHRKHRNQLVILAEKIVDNMLCMYFPHGSYFAWEINKLLFNMRSFGIFQHHSQILAWDNLPTTTDTDTPGKRIHSSTESVATGFAESMSFVVAALNCLMG

ALCISIVVFGLELLSRRRHWTGLEWLFERV

>DmelIR7e

MNISALLNSYYDLSGEQMNHINEFVARAVLHVVHHYILSVTPSLVLTLCCRSNHTCNFYNKMMSTLFREWGLAPLQIVNVLRGVPWHPVPGRRHFNVIFTDSFAAFEEIRM

EYYSREYNYNEHYFIFLQARDRLLQGEMRLIFDYCWRYRLIHCSIQVQKSNGDILFYSYYPFGEHGCSDMEPQLINRYNGSMLVEPDLFPRKLRNFFGCPLRCALWDVPPFL

TLDEDQEEVLRVNGGYEGRLLLALAEKMNFTIAVRKVHVNMRDEALEMLRRDEVDLTLGGIRQTVARGMVATSSHNYHQTREVFGVLASSYELSSFDILFYPYRLQIWMG

ILGVVALSALIQLIVGRMLRERMGSRFWLNLELVFVGMPLLECPRSHTARLYCVMLMMYTLIIRTIYQGLLYHLIRTHQLNRWPQTIESLVQKNFTVVLTPIVQEVLDEIPSVQ

HMRFRLLEANSELDPLYFLEANHQLRQHVTASALDIFIHFNRLSADKVHQRGEQGSGAHFEIVPEDIISMQLTMYLAKHSFLIDQLNEEIMWMRSVGLLSVWSRWELSESYL

RNEQSFQVLGTMELYAIFLMVLVGLIVGLLVFILELVSMRSIYLRKLFT

>DmelIR52a

MALGWSVIILGFIGQLSAQILNYTQSRDLELLEGSLFRVLSRLNLEEEYNTLLIYGKECVFHSLLRKLEI

SAVTVPSGSTDYDWSFSTAILILSCGYDAENEENSYTLMKLQRTRRLIYLEDNSEPESVCMRYSLKEQHN

IAMVKSDFDQSDTFYSCRLFQTPNYVEGHFFKDQPIYIENFQNMRGATIRTVADSLVPRTILYRDEKSGE

TKMMGYLGHMINTYAQKLNAKLHFIDTSKLGAKKPSVLDIMNWVNEDIVDIGTALASSLQFKNMDSVWYP

YLLTGYCLMVPVPAKMPYNLVYSMIVDPLVLSIIFVMLCLFSVLIIYTQHLSWKNLTLANILLNDKSLRG

LLGQSFPFPPNPSKHLKLIIFVLCFASVMITTMYEAYLQSYFTQPPSEPYIRSFRDIGNSSLKMAISRLE

VNVLTSLNNSHFREISEDHLLIFDDLSEYLVLRDSFNTSFIFPVSVDRWNGYEEQQKLFAEPAFYLATNL

CFNQFMLFSPPLRRYLPHRHLFEDHMMRQHEFGLVTFWKSQSFIEMVRLGLASMEDLSRKRNEEVSLLLD

DISWILKLYLGAMFISSFCFILEILRCGERCKRLWRCRW

>DmelIR7f

MNTTSDSNAGSSLSSGSGYSIYKSYLENSRIDMQGEDANLYVARALRLVIENVLAQLSTTLVVTISTRHLGTAHWFEYMMNILMDSWRMVAVQLLRIRPDLVVNPVPGRKR

VSLLMVDSYQGLLDTNITASNANFDDPDYYFIFLQARDHLIPKELQLILDHCLAHFWLHCNVMIQTAQVEVLVYTYYPYTADACQKAYPIPVNTFDGRKWKASQMFPDKL

SQMHGCPLTVLTWHQPPFVELVWDPKHNRSRGSGFEIQLVEHLARRMNFSLELVNIALLRPNAYRLAEGSSEGPIEKLLQRNVNISMGYFRKTARRNQLLTTPMSYYSANLV

AVLQLERYRIGSLALLVFPFELSVWMLLLLALLIHLGIHLPSARRGNEEDGGGGLQVVALLLGAALARLPRSWRHRFIAAHWLWASIPLRISYQSLLFHLIRLQLYNTPSFSLD

QLLAEGFQGICTANTQRLLLEMPQLARDPDSIQSVDTPFDWDVLNVLTRNRNRKIFAVANQDVTLSFLHSSAHPNAFHVVKQPVNVEYAGMYMPKHSFLYEKMDDDIRRL

DASGFIHAWRRASFASVHRKEQVHMTSRRYINHAKLSGIYMVMAGLYLLAGLLFAGEVLLRQRN

>DmelIR52b

MTWLVILLCFLGYMAAHIADISVQNQSLMDNELINLLLKLRNEEFYDTLLVYGKDCEFHSVIKNVDVAVVLVSDSMNFEWNFSSLTLILSCGPDIDNGGPNSTSIKLQRNRRL

VLLKEDFQPSNICNIYTQKEQYNIALVRENFTKSKSIYTCRYFQDPNVDEVNLSGTKPIFIEQFQNMKGKAIRIVPDLLPPRVMLYQDANDGELKMIGYVANLITNFAQKVNA

TLQLDFLKPSTSITEISRMAKDDELDMGITLEASLNTSNLETSSYPYLLTSYCLMVQVPAKFPYNLVYALIVDPLVLGIIFVLFLLLSVLLIYSQKMSWQDLSVANILLNDKSLR

GLLGQSFPFPLNASKKLRLIFTILCFASIMLTTMYEAYLQSFFTNPPSEPEICSFQDVGSYNRRIAMSALEVNGLIKTNNSHFREIRMDDLEIFDNMPECYELRDAFNLSYNYVV

TGDRWRSYAEQQTLFKEPVFYFARDLCFSRLIFLSVPLRRHLPYRHLFDEHMMQQHEFGFVNYWMSHSFFDMVRLGLTSLKDLSRPLAYTPSLLMDDISWIMKIYLAAIVL

CVFCFLLEIGVDKWKRWMKFRNLQILNTC

>DmelIR52c

MVWLIIILFCLGNSSSQILDVTNNSHLDFDYRLFGLLQRLQVEKSYDTLLVYGEDCAIPSLFERLQVPAVLVSSGSTNFDWNFSSLTLILSCNFQDEREENYRTLMKLQTSRRLI

LLKGHIKPESVCDFYSKKEQHNVAMVKENFYQLEVVYSCRLFQDQNYEKLNLFDGKSIYKDQFRNMHGAPIRTLSDKEPPRTIPYIDSKTGEEKFKGYVGMLISQFVKKVN

ATMQIREDLIKDDEEVSFVDITNFTSNDILDIGICEARTLEMSNYDAISYPYLMSSYCFMAPLPDSLPFSDVYMAIVAPSILIMFLIIFCICSVLIIYIQERSYRSLTIRSVLMNDICL

RGFLAQPFPFPRQYNRKLKLIFMLVCFSSLISTTMYTAYLQAFLWGPPIEPRLTSFDDVKKSRYTMAINIYEREFLEALNVSLEDVEIYDYGKFSKLRSTFNTNYLFPVTALQW

FTINEEQKLFKYKIFYYCDAFCLNQFDILSIPLRRHLPYRDIFEEHMLLQKEFGLTKYWIDQSYRDMIRANLTTFKDFSPLLENDYIEVHNLYWVFTMYFVGMGMGLCFFILEI

LRPLRYWRNCKIKCEYCYAFLKNFAK

>DmelIR52d

MVRIIIILLCLGYTKARILDATNTNHTDLEERLLSLLLRLQQEQFFNTLLIYGEDCAFSSLSRRLQVPTILVSSGSTSFEWNYSSLALILTCEFKAEREENYQTLKKLQMNRRLIL

LNGNIKPDSVCDFYSKKDQYNIAMVNNNFHQVGIIYACRLFQERNYEKVYLSEGNPIYVDQFRNMQGALLKSITFNLIPGSMAYRDPKTGQEKHIGYVANLLNNFVEKVNA

TLDMQVKLHKAGKKTSFYNITKWASEDLVDIGMSYAAYFEMTNFDTISYPYLMTSTCFMVPLPDMMPNSEIYMGIVDPPVLVVLIAIFCIFSVMLNYIKQRSWRSLSLVNVL

LNDICLRGFLAQPFPFPRQSNRKLKLISMLVCFFSVITTTMYTSYLQSFMWGPPIDPKMCSFADLENSRYKLAIRRYDIEMLRPFNVSMDHVVVFDESSQLEYLRDSFDDNY

MYPMSALSWSAFKEQQKLFAFPLFYYSEKLCLKPISFFSFPIRRHLPYRDLFEEHMLQQNEFGLSTYWIDRSFSDMVRLKLATMNDFSPPRLEDYIEVSDLSWVFGMYFTGL

GISCCCFGLELLGLPSWTRRLRLTNWLRVRN

>DmelIR54a

MWTVITGIVLWAPVLVAGSAVDFIFRAAAEHSLSVIMIRIDYCPYNWAKDIFENQTIPVVVLSDSETFINIRMFSRPLHVACLPGHELQKDLALLENFTSSLMDFPSQKKIVYIS

NNFSDPTRMDYIFETCYHRRIWNIVGLLASDEHRYFYRYHLYPSFRTEYRSLESSTIFDKDFPNMHGHPLTVMPDQWLPRSVLYVDRRTGKQILAGSVGRFFHVLSWKLNAT

LQLSKKVTTGRFLNATALKELSESFSVDVPASLTIMERVEQLASTSYPMEVTHVCLMVPVARRIPIKDIYFILSSASNMFLAIVIVSSYGLALNLLRNMTHRDVRLVDFVLNDK

ALRGILGQSFNLPLSRSFSTRLIFLMLGIVGLNVSSIFGAGLDTLMAHPPRQFQARSFAGLRRTKIPLVTTEEDFPTWMKLRVPMLVVNVSEYNHLRNGRNTSNAYFASRLYW

NLFSEQQKRFTRELFIYSTDDCLWSLALLSFQWPQNSLFTEPVSQLILEVNANGLYDFWVGMHYYDMTAAGLSGLEDPSLQLKEREHPTSLRIVDFQWMWQAYGTFMVIAI

LVFLLEVSWHRITSLFVSLVY

>DmelIR56a

MGSRFFIRNLILFGLLASSNMQIPFGELEKKFELDVDFLLGVTELVGHIQGLYSITVYADCIDIHPSIQQRIMDKFMVPVNTIGSNLSRPNYHKLDNSRIRIVLFTGLNDTILVNL

NKTDVPYSDNFYMLAYASAIKNKCIELDFIEEVFTLLWKMSIQNAILLIRGEFMMEMWSYLYMGKIHKIKLTKPNSYLESLRKYNYRFSLEVINDPPAIFWYNSSEQADVTG

GGNLSVSGPLGLIIINFLRHLNVTIDIVPIPGKQTSQYELFQQPDNLRAENGVNMVGSALLKYSPMVTQSRMCLLVSNRRMIPFSRFLDRLVSPGVHKLTFVSSIGIFVIKYFSH

RPRSFVDAIFCTIRFFFAIPLPSIILNRLPVVDRFIEVFIIIFVQILLSSNISITTSALTTGFWEPPIINVETMRASGLHILTEDPTILQAFKENILPSSLADLVILVDEDTYFHHVTTLNN

SYVYVVQAHNWQIFRLYQQQMTNEPFEIASEELCSKWRILGIPLNPKSPLRFMFKDYFYRILESGLREQWVHSGFKKFCEFNNLKKLPVDSVDSWQPLSIEFYSNVIRAYIIG

LVIATLAFVAELLHNGYRRKNVKKT

>DmelIR56b

MLLDTDLASGVIRSPYSFDIPHAFIFNETQFVVPKFCGPYMEIVKHFAEVYHYQLFLDSLESLPKKSVVEQDIISGKYNLSLHGVIIRPEETSDFFNATQHSYPLELMTNCVMV

PLAPELPKWMYMVWPLGKYIWTCLFLGTFYVALLLRYVHWREPGNATRSYTRNVLHAMALLMFSANMNMSVKLKHASIRVIIFYTLLYIFGFILTNYHLSHMTAFDMKPV

FLRPIDTWSDLIHSRLRIVIHDSLLEELRWLPVYQALLASPSRSYAYVVTQDAWLFFNRQQKVLIQPYFHLSKVCFGGLFNALPMASNASFADSLNKFILNVWQAGLWNYW

EELAFRYAEQAGYAKVFLDTYPVEPLNLEFFTTAWIVLSAGIPISSLAFCLELFIHRRKQRRPQYERFECYDY

>DmelIR56d

MDNRAAELILRERNIFPTNGSDNITLLNNMFVLEMFYRITQLYHFKNFIFYISERLDLNNKDSQEFFHNFWTYFPMAPNLIITREHHLGIPMMQFISTPSLVMVFTTGKDDPIM

ELASHNQQGIHWLKTIFVLFPSLQSRDFETNPESLAQFTAEIKDVYDWVWRKQFINTFLITIKDNVFILDPYPTPSIVNKTGVWQAEEFFHKYAKNMKGYLVRTPILYDMPRV

FKSDRPTNRYEKNFIHGTSGNLFLGFLEFVNATLMDTSANVTADYLNMTNLLDLVSQGVYETLIHSFTEITTKFVVSYSYPIGINDCCIMVPYRNQSPADQYMHEALQENVW

VLISLFTLYITVAIYLCSPLRPRDLSAAFLQSICTLTYSVPTFIIRTPTLRMRYLYILLAIWGIVTSNLYISRMTSYFTTAPPVRQINTVQDVVEANLRIKMLAIEYERMAKSPLQYP

ESYLNQVDLVDKHMLDLHRDPFNTSFGYTVSSDRWRFLNLQQLHLRKPIFRLTEICEGPFYHVFPLHKDSHMRSVMTEYIMIAQQAGLMNHWERETFWEAVHLHRIHVHL

FDDEPMALSLDFFSSLLRTWTLGLILAGLAFAAEMKWHEHVTFKRRPVIRITRKPRSFLRRFMKL

>DmelIR60a

MWCNNPGLIIIIFLGQILNLCQGIVNLSNETANTVIFMLPEKDLGPDVWKAGVGCLDSFAQIFFFRNPKERFTRAYNLMLVHAFHLSSPADQIQEGFSKLINEAVTNPGPPDRE

ELFQMRVASDYNITNGTEDKGELILADNYVIVVDSVDRLKELMKKKIVEMRSWNPGARFLVLFHNATCRNRPLGVASNIFKDLMEMFYVHRVALLYANSTMNYNLLVNDY

YSNVNCRILNVQSVGQCHDGKLYPNNAVVKASMQDYVSGFSPRNCTFFACSSISAPFVEADCILGLEMRILGFMKNRLKFDVNQTCSLESRGEMDGPANWTGLLGKVQNNECDFVFGGYYPDNEVADHFWGSDTYLQDAHTWYIKMADRRPAWQALVGIFEAYTWIGFILILIISWLFWFTLVMILPEPKYYQQLSLTAINALAVTISIAVQERPICETTRLFF

MALTLYGLNVVATYTSKMIATFQDPGYLHQLDELTEVVAAGIPFGGHEESRDWFENDDDMWIFNGYNISPEFIPQSKNLEAVKWGQRCILSNRMYTMQSPLADVIYAFPNN

VFSSPVQMIMKAGFPFLFEMNSIIRLMRDVGIFQKIDADFRYNNTYLNRINKMRPQFPETAIVLTTEHLKGPFFILVVGSCWAALTFIGELIIHRWRTQLVSTSEQQDRRSDKRR

RRRRRRKPEKDNRWQRQVQVAPVVRFTPVKRRKVFQGQTSQK

>DmelIR60b

MRRSLYLIIAIGLVDVHCVSLRYILNALENELQYRAILLVESASEIESCWEQKYIQGAVPILNFNANQSLYLKDALNTNILALVCLNENVESTMQALYENLEDMRDTPTILFVL

SDSKVQDVFLECLRRKMLNVLAFKGLDRGFVYSFRAFPTFRVIERNVMDILQYFEQQLEDLGGHTLTTLPDNIIPRTVVYKSPDGSRQLAGYLYPFLRNYVSTINATLKVCW

HLVPEDGMIQLGEVVRLSEIHDVDFPLGMHGIEHGSTSQNVPLEVSSWFLMLPMEPSLSRAQFFIMLGFEKVTPVLLLLTILLSTAHRIEMGLRPSWRCYVLGDRVLQGTLG

QAFFLPRRLSVKLMLVYSLILLNGFTFSNYSITSLETWLVHPPSGHPIHSWEQMRTLNLKVLIVPSELDSMTKALGKQFTESNSDLFELSKSGNFQDKRLAMDQSYAYPVTCT

LWPLLEHAQIRLPKPEFRRSREMVLIPLLIMAMPLPKNSMFHKSLNRYRALTHQSGLYEFWFKRSFNELVALRKIHYKVNGDHQIYRDFEWQDFSYVWLGFVGGTIASILVL

LAEIGYHRWQLNQN

>DmelIR60d

MRLAIYVAFLSSIGNRSGFLSSLLMSLGKELHYKTILLVGGSSTCWSLEPFETGVPILNLRGENNAYPQDTFNSQMLALACLQTESEDAVKLLYRSLKDMRDTPTLLFASSEE

HIHDTLFLGCFRENMLNVLALTASSKEFIYSYQAFPTFRVIKRKLVEIHRYFEPQLKDLGGHIVSALPGNIMPRTMCYRNAEGERQLAGYLNTFIRNYVESINGTLRISWGLVP

EDDMRHLTISRLSKIQHVDFPLGIIPLYNKTDKQHVYMEISSWFLMLPMETSVPRAHLFVKLGLERLLPIIVVVGAVLGNAHRIEVGLGPSWRCYYLADKVLRGALAQPIVLP

RRLSPKLMLIYSLLLLSGFFLSNYYMASLTTWLVHPPASDRILEWDQLRYLHLKVLTIPEEFKYMSLILGTDFMTAYGSIFQLTNSTDFQRRRISMDPSYAYPVTTSLWPFLELS

QVRLRRPLFRRSYDMVLQPFQVMSLPLPRNSIFHKSLLRYAALTRETGLYYYWFRRSYYELVALGKISYKEEEGNPYCDLKWNDFRIVWLAFLGGTIISCLALLLEVAHYRW

HLGNSSL

>DmelIR60e

MVIKMISFLLVSVLLCLVGASDSESMQVQVLQDLNLALQTELNVFIDFECCATSEILHKLDSPRILLSSNSREARDLRIRGNFTESTLIIVSVMDSDLNPLVASLLPRLLDELHEL

HIVFLSNEEPGFPKQDLYTYCFKEGFVNVILMSGKGLYSYLPYPSIQPISLSNVSEYFDRARIIRNFQGFPVRILRSTLAPRDFEYSNEQGGLVRAGYLFTAVKELTYRYNATIES

VPIPDLPEYDVYLAVAEMLHTKKIDIVCYFKDFSLEVAYTAPLSIIREYFMAPHARPISSYLYYSKPFGWTLWAVVISTVLYGTVMLHLAARGARVEIGKCLLYSLSHILYNCH

QKIRVAGWRDVAIHGILTIGGFILTNVYLATLSSILTSGLYDEEYNTLEDLARAPYPSLHDEYYRSQMKAKTFLPERLRRNSLSLNATLLKAYRDGLNQSYIYILYEDRLELILM

QQYLLKTPRFNMIRQAVGFTLESYCVSNSLPYLAMTSEFMRRLQEHGISIKMKADTFRELIHQGIYTLMRDDEPPAKAFDLDYYFFAFVLWTVGLISSLLVFFAELVSGHL

>DmelIR64a

MHWWLLVFLPLSCQGLPEHELLELELDYGLAEPQRTSLLQSSLILQFSQDYKHIPRITYFTCQKPHLQTPNQIPNAAEHRDAFAAKNFQLIKSLYESELFVRIVLLDVLAQSPT

SGRPNRPGNGPTGGFSQTPSQAQSNSEWLEGVLRMEALRQIAVVDLACGAVSRRFLELASAKMLYSEKFHWLLIEDFAWHGRTQTAEGSGKRDDGEMEEEEPPGQQIQAT

DDEDLPSIESFLGGMNLYMNTELTLAKRMSEAAHYTLFDVWNPGLNYGGHVNLTEIGSFTPTEGIQLHTWFRTTSTVRRRMDMQHARVRCMVVVTNKNMTGTLMYYLT

HTMSGHIDTMNRFNFNLLMAVRDMFNWTFVLSRTTSWGYVKNGRFDGMIGALIRNETDIGGAPIFYWLERHKWIDVAGRSWSSRPCFIFRHPRSTQKDRIVFLQPFTNDVWILIVGCGVLTVFILWFLTTIEWKLVPHDGSALIKPKGGAPPRHHYQQQQQQEQVEAPVRPITAVSVVVSKEKVEEKQEEYEDSTPIDAGTLWQRCYQKLNKYIKDRKAKQ

KKAPERVGLFLESVLFFVGIICQQGLGFSTSFVSGRCIVITSLLFSFCIYQFYSASIVGTLLMEKPKTIKTLSDLVHSSLKVGMEDILYNRDYFLHTKDPVSMELYAKKITSVPTT

KENEADEDEPVDPNPVSTDPAKSYRDIVHSHETGAHAKDNAASNWLDPETGLLRHLGFAFHVDVAAAYKIIAETFSEQDICDLTEVSMFPPQKTVSIMQKNSPMRKVISYGL

RRVTETGILTYHFNVWHSRKPPCVKKIETSDLHVDMDTVSSALLILLFSYAITLMILGTEILYSKWHNRIQLKWVGAT

>DmelIR67a

MLPILVPVLLLFNETSWINPILTSIYKDRHHETVLLLQHSQHGNASGLERFPWPVFSFNEQMDFYVRGKYNSEMLVLIWQTGNSDWDLDLWQALDRSLLNMRKVRVLLLR

KWEKIPTADVAATAEHLLFLHVAVIGQGNRIYRLQPYAPQSWLQVDPIESPIFIKIRNYFGRYIVTLPDQFPPRSIVYRNPKTDEIQMTGYVYKFLLEFIRIYNFTFRWQRPIVQG

ERMNLILLRNMTLNGTINLAISLCGFETPSELGVFSDVYDMEEWYIMVPRAQEISIADVYVVMVSGNFLIVLIIFYFIFTILDTCFGPLLLKERVDWSNLMLNERMISGIMGQS

FNMSARNTISSKVTNATLFLLGLVLSTLYAAHLKTLLTKRPTSQQISNFKQLRDSPVTVFFEEAERFYLKHAWDRPIRYIKDQLNFRETIEYNALRMGLNRSNAFSALTSEWMI

VAKRQELFKQPIFTVQPELRVIQTSVLLSLVMQSNSIYEDHINDLIHRVQSAGIVEYWKHQTLREMITMGMISQKDPFPYVAFREFKVGDLFWIWLLWVSFLFMSFVIFLCELL

VDCFISKTLIRNKRPH

>DmelIR67b

MELLYLNTLQSLSLLEGNRLVQTVQELNNIYQTELNVFLEFGNGADILESAQGTFVPTLWIKNPQNQKVMKGNFTSCTLTILYLEDEHLDRGLYYLANWLWEYHHLEVLIFF

NGGSYDKLIQIFSRCFNEGFVNVLVMLPGSDELYTFMPYQDLKILNLKSIKEFYSLSRKKMDLNGYNITSGLVIAGAPRWFSFRDRQNRLILTGYMLRMIVDFTNHFNGSVRL

MNVLTVNDGLELLANRTIDFFPFLIRPLKSFSMSNILYLENCGLIVPTSRPLPNWVYLLRPYAFDTWIAWLIMLIYCSLALRILSKGQISISAAFLKVLRLVMYLSGSRDMGTRP

TTRRLFLFVILTTSGFILTNLYVAQLSSNSAAGLYEKQINTWEDLDKSDSIWPLIDVDIKTMEKLIPDRTKLLKKIVPTLEADVDTYRRNLNTSCIHSGFFDRIDFALYQQKFLRF

PIFRKFPHLLYQQPLQISAAFGRPYLQLFNWFVRKIFESGIYLKMKDDAYRHGIQSGLLNLAFRDRHLEVKSNDVEYYYLIAGLWFGGLTLATVCFLLELLIGYAKIKVTISCK

MNIM

>DmelIR67c

MFCWLIFLNIILLSDRSESWSAREVIHQFNHDQQLQLNIYLDCNDVELQIGQEVSNLFVNSTADKMKILGRFSSHSLIIACFKDSTRNRTLNGVKELLWGLQYLPILFVVDSN

MDFYFQQALRHGFIHVLALNFMNGSLYTYKPYPKVEVHQIKDMQKFYKLTKLRNLQGQAVRTTVETMTPRCFRYRNRHGQLVYAGYMYRMVKEFISTYNGTEEHVFGN

VDTVPYKEGLAALKNGEIDMMPRIIHALEWYYFYRSHILYNIKTYIMVPWAEPLPKSLYFIQPFRGTVWITIMVSFVYASIVIWWIRYRQQGNSSLTQSFMDVLQLLFQLPLS

KIWHFNMGTHQVVSFIVLFVFGFMLTNLYTAQLSSYLTTGLFKSQINTFDDLFREKRTLLVESFDAEVLHNMTKEKIIQKEFESIILITSIEEVFKHRKSLNTSYAYEAYEDRIAF

ELSQQRYLRVPIFKILKEVYDQRPVFVALRHGLPYVELFNNYLRRIFESGIWIKLQEDSFLEGIASGEISFRKSKSREIKIFDKDFYFFAYILLGMGWCVSTIALFLELWSFKYSV

TNVLHEG

>DmelIR68b

MKFLVGLLLQWYLPGIYALAEIACRIAVEQNVQVTYLYRCASCPASFDADYSALELDLYRCVGSRLPVITRNMEAHELEPFRRTDSLSIFQIPAAEKGDSLVRRILDMLNPHQ

RRKHMHKYLFVWPNAGRHQLLRLFRGSWAKKLLYGLAITGRENGTFDFDPFAWGGLQVIQRLDGEVPYARKVKDLRGYPLRFSMFTDPLMAMPRSPVETAGYQAVDGV

AARVVGEMLNASVTYVFPEDNESYGRCLPNGNYTGVVSDIVGGHTHFAPNSRFVLDCIWPAVEVLYPYTRRNLHLVVPASAIQPEYLIFVRVFRRTVWYLLLVTLLVVVLVFWVMQRLQRRIPRRGVIQFQATWYEILEMFGKTHVGEPAGRLSSFSSMRTFLMGWILFSYVLSTIYFAKLESGFVRPSYEEQVDRVDDLVHLDVHIYAVTTMYDAVRSALTEH

QYGLLENRSRQLPLGIATSYYQPVVRRRDRRAAFIMRDFHARDFLAITYDSQAERPAYHIAREYLRSMICTYILPRGSPFLHRLESLYSGFLEHGFFEHWRQMDLITRVGASP

DAEEFLEDLGDQTDTDSGSNELAIRNKKVVLTLDILQGAFYLWSVGIGISCLGFAVEHAHWFWRRQTLRNAVEARTS

>DmelIR75a

MQLVQLANFVLDNLVQSRIGFIVLFHCWQSDESLKFAQQFMKPIHPILVYHQFVQMRGVLNWSHLELSYMGHTQPTLAIYVDIKCDQTQDLLEEASREQIYNQHYHWLLV

GNQSKLEFYDLFGLFNISIDADVSYVKEQIQDNNDSVAYAVHDVYNNGKIIGGQLNVTGSHEMSCDPFVCRRTRHLSSLQKRSKYGNREQLTDVVLRVATVVTQRPLTLSDD

ELIRFLSQENDTHIDSLARFGFHLTLILRDLLHCKMKFIFSDSWSKSDVVGGSVGAVVDQTADLTATPSLATEGRLKYLSAIIETGFFRSVCIFRTPHNAGLRGDVFLQPFSPLV

WYLFGGVLSLIGVLLWITFYMECKRMQKRWRLDYLPSLLSTFLISFGAACIQSSSLIPRSAGGRLIYFALFLISFIMYNYYTSVVVSSLLSSPVKSKIKTMRQLAESSLTVGLEP

LPFTKSYLNYSRLPEIHLFIKRKIESQTQNPELWLPAEQGVLRVRDNPGYVYVFETSSGYAYVERYFTAQEICDLNEVLFRPEQLFYTHLHRNSTYKELFRLRFLRILETGVYR

KQRSYWVHMKLHCVAQNFVITVGMEYVAPLLLMLICADILVVVILLVELAWKRFFTRHLTFHP

>DmelIR75b

MLQLHNLILHNLIHMAKLSHVLILHCSLSHLALLAQSKNIFTQFQPLHSDIQLNDDFLNHNILKLGVFLDINCDKSGTVLDMASAKRFFSHRYHWLIYDRSMNFSVLESHFK

EAQIFVDADVTYVTHDPFSKNFLLYDVYNKGRQLGGELNITADREIFCNKTNCRVERYLSELYTRSALQHRKSFTGLTMRATAVVTALPLNVSIKEIFDFMNSKYRIQLDTYA

RLGYQARQPLRDMLDCKFKYIFRDRWSDGNATGGMIGDLILDKADLAIAPFIYSFDRALFLQPITKFSVFREICMFRNPRSVSAGLSATEFLQPFSGGVWLTFALLLLLAGCL

LWVTFILERRKQWKPSLLTSCLLSFGAGCIQGAWLTPRSMGGRMAFFALMVTSYLMYNYYTSIVVSKLLGQPIKSNIRTLQQLADSNLDVGIEPTVYTRIYVETSEEPDVRD

LYRKKVLGSKRSPDKIWIPTEAGVLSVRDQEGFVYITGVATGYEFVRKHFLAHQICELNEIPLRDASHTHTVLAKRSPYAELIKLSELRMLETGVHFKHERSWMETKLHCYQ

HNHTVAVGLEYAAPLFIILLGAIILCMGILGLEVIWHRHCTLH

>DmelIR75c

MTSWPLYRLIVFNLLEINLSNLMVFHCWSIKEAFPLVEMLNQNGIFSQYIDVQNPDNLANVHKEYLDSDLVRLGVFLDLGCDKAELVTNQSSRARLYNQNLHWLLYDEAG

NFTKLTQLFEGANLSLNADVTYVSREDEERFILHDVYNKGSHLGGKLNITVDQTLQCNRSHCQVKEYLSELHLRPRLQHRMDLSSVTFRLAALVSVLPINSSEEELLEFLNS

DRDSHMDSISRIGNRLIMHTQEILGFKLHYIWCGTWSVQDAFGGAIGMLTNESAELCTTPFVPSWNRLHYLHPMTEQAQFRAVCMFRTPHNAGIKAAVFLEPFMPSVWFAF

AGLLIFAGVLLWMIFHLERHWMQRCLDFIPSLLSSCLISFGAACIQGSYLMPKSAGGRLAFIAVMLTSFLMYNYYTSIVVSTLLGSPVRSNIRTIQQLADSSLDVGFDTVPFTK

TYLVSSPRPDIRSLYKQKVESKRDPNSVWLSPEEGVIRVRDQPGFVYTSEASFMYHFVEKHYLPREISDLNEIILRPESAVYGMVHLNSTYRQLLTQLQVRMLETGITSKQSRF

FSKTKLHTFSNSFVIQVGMEYAAPLFISLLVAYFLALLILILEICWARYAKKKFSTIIPQNQ

>DmelIR75d

MKVQVAHWLPLIFFLLVSGTPRVAGSWRSEYSRQDPDPKTRWGNQLPDMLVAYYRHHGVHSLMLVVCHTDIADFRLWKLWQHFNLNNFYVQVSTESSLRDLQHVDALDE

HKDAPPPKSFHANNSTHWETSFLLPALPYKMGILLLEFSSECALNLLRWSAASEHNYFTTNRFWLLLTEDPGDIDLLEDPEIFIPPDSELRVLHYENVGNFSCSLIDLYKVAAW

KPLKRTLVGHNIRNSRHVIHALQHFGSAITYRQDLEGIVFNSAIVIAFPDLFTNIEDLSLRHIDTISKVNHRLMLELANRLNMSYNTYQTVNYGWRQPNGSFDGLMGRFQRY

ELDLAQLAIFMRLDRIALVDFVAETYRVRAGIMFRQPPLSAVANIFAMPFENDVWVSILMLLIITTVVLVLELFFSPHNHDMSYMDTLNFVWGAMCQQGFYVEVRNRSARIIVFTTFVAALFLFTSFSANIVALLQSPSDAIQSLSDLGQSPLEIGVQDTQYNKIYFTESTDPVTKNLYHKKIASKGENIYMRPLLGMEKMRTGLFAYQVELQAGYQIVSDTFSEP

EKCGLMELEPFQLPMLAIPTRKNFPYKELIRRQLRWQREVSLVNREERKWIPQKPKCEGGVGGFVSIGITECRYALGIFGCGAAVSFVLFLFEFIFRHFKQVYRIIKGYREVQR

>DmelIR76b

MATGIELLVAAALCVACPPLNDSPPTNLIQMGENGTLSPVTELPMDVDASEAGFDADAPVETLETINRKKPKLREMLDWIGGKHLRIATLEDFPLSYTEVLENGTRVGHGVS

FQIIDFLKKKFNFTYEVVVPQDNIIGSPSDFDRSLIEMVNSSTVDLAAAFIPSLSDQRSFVYYSTTTLDEGEWIMVMQRPRESASGSGLLAPFEFWVWILILVSLLAVGPIIYALII

LRNRLTGDGQQTPYSLGHCAWFVYGALMKQGSTLSPIADSTRLLFATWWIFITILTSFYTANLTAFLTLSKFTLPYNTVNDILTKNKHFVSMRGGGVEYAIRTTNESLSMLNR

MIQNNYAVFSDETNDTYNLQNYVEKNGYVFVRDRPAINIMLYRDYLYRKTVSFSDEKVHCPFAMAKEPFLKKKRTFAYPIGSNLSQLFDPELLHLVESGIVKHLSKRNLPSA

EICPQDLGGTERQLRNGDLMMTYYIMLAGFATALAVFSTELMFRYVNSRQEANKWARHGIGRTPNGQSVAPSRWLRGWRRLNSGHGQLLGASTHGQNVTPPPPYQSIFNG

GSHGDPLNRWRRPLANGNALGNGVLLGGDSEGGVRRLINGRDYMVFRNPNGQSQLVPVRSPSAALFQYSYTE

>DmelIR85a

MSIQWLKHILLLAILVNLAGTRENHIPLDLKKSSIVMVKMSQILCKARIKVLFVYFENQTSHEHTGQILKEVTKCDISNQNTPLEAVKDDGILMYMVMITTNISQPLELSLIRK

KSAAKHRSHVFLLVRDADTVSDAWMRASFRQFWKIWLLNIVILYWRDGRLNAYRYNPFMDNYLIPVDNKPNEVPTLEQLFPKTIPNMQRKPLRMCIYKDDVRAIFWRQGT

ILGTDGLLAAYVAERLNATMMITRPHSYNNHNLSSDICFLEVAKEYVDVAMNIRFLVPDTFRKQAESTVSHTRDDLCVIVPKAKTAPTFWNIFRSFGSLVWALILVSVLVANV

FCYILKSEVGRVPMQLFAGALTMPMTQIPPNHSIRLFLIFWLYFGLLICSAFKGNLTSMMVFQPYLPDINQLGALARSHYHIIIRPRHVKHIQHFLTLGHKHESRIREQMLEVSD

TQMYEMMRNNDIRFAYLEKYHIARFQVNSRVHMHLGRPLFHLMNSCLVPFHAVYIVPYGSPYLGFLDSLIRSSHEFGFERYWDRIMNSAFIKSGVKVVNRRRGSGNDEPVV

LKLQHFHAVFALWLVGIGMACIVLAWEHLTHNYNLAVTKRRD

>DmelIR87a

MSTPEQRFWLAALLFLLSQHSEVRGFGINLMKVQTEDKGQEACILALLRKYFDSGDGLSGSVLCINRNYQLPNIEEQLLRGVNNYENYPWSLLITNSREGPSPAKFLMNEKP

QCYFLIVDNLEDEDLDEVFEHWKGMVNWNPLAQFVVYLASLEETDEEMNDLMVELLLTFINKKIFNVNVIGQSEENQFYYGKTVFPYHPDNNCGNRVISVELLDACDYPS

EETDSEDENDEDEGDGAQEEDDGPQEEGDGEQEEEDGPQEQEDGDQAKGDEGQENDDGGLENKVENEFRIGASDDDELENDLSSNSSEPEAIIEEFFRAKFEDKFPRDLSG

CPLTASFRPWEPYIFRNSEEQPVDDYYYGLQGDEDDYNDTSPNYGESDDESYADPGEDGDGAIPDTETQSGGKLKLSGIEYEMVQTIAERLHVSIEMQGENSNLYHLFQQLI

DGEIEMIVGGIDEDPSISQFVSSSIPYHQDELTWCVARAKRRHGFFNFVATFNADAGFLIGIFVVTCSLVVWLAQRVSGFQLRNLNGYFPTCLRVLGILLNQAIPAQDFPITLRQ

LFALSFLMGFFFSNTYQSFLISTLTTPRSSYQIHTLQEIYSNKMTVMGTSEHVRHLNKDGEIFKYIREKFQMCYNLVDCLNDAAQNEHIAVAVSRQHSFYNPRIQRDRLYCFDR

RESLYVYLVTMLLPKKYHLLHQINPVIQHIIESGHMQKWARDLDMRRMIHEEITRVREDPFKALTFDQFRGAIAFSGGLLLVASCVFAFELCYVKYVYRTEKRERKTKKITKK

VHNIKIQHD

>DmelIR92a

MLLQPLVMHLSQLLRIIVGQYFAEFPSILIVYNNSASTTPLQLEYLSALELVLRELSKPIRLQWINVAFLKDLNDLEDQVMGALNSSVTEGFITILSQTHHFIHARYYATRNANV

RLKDKRYLFLCEDESPAELLCMDILQFYPHHLMVRPGTETAPTGPTGPHPDPRRGGGASVSTKNKDDGEGGAGNKTTSPYRDINFELWTQKFVGAVGNLDALLLDAFLPNE

TFANRVELYPNKLLNLQRRSLLVGSITYVPYTITNYVPAGQGDVDPIHPQWPNRSLTFDGAEANVMKTFCQVHNCHLRVEAYGADNWGGIYDNESSDGMLGDIYEQRVEMAIGCIYNWYDGITETSHTIARSSVTILGPAPAPLPSWRTNIMPFNNRAWLVLISTLVICGTFLYFMKYVSYRLRYSGTQVKFHHSRKLEKSMLDIFALFIQQPSAPLSFDRFAPRF

FLATILCATITLENIYSGQLKSMLTFPFYSAPVDTIEKWAQSGWKWSAPSIIWVHTVQSSDLETEQILARNFEVHDYSYLSNVSFMPNYGFGIERLSSGSLSVGDYVSTEALEN

RIVLHDDLYFDYTRAVSIRGWILMPELNKHIRTCQETGLYFHWELEFIDKYMDKKKQEVLMDLANGHKVKGAPQALDVRNIAGALFVLAFGVAFAGCALVAELLIHRMDL

SK

>DmelIR93a

MNPGEMRPSACLLLLAGLQLSILVPTEANDFSSFLSANASLAVVVDHEYMTVHGENILAHFEKILSDVIRENLRNGGINVKYFSWNAVRLKKDFLAAITVTDCENTWNFYK

NTQETSILLIAITDSDCPRLPLNRALMVPIVENGDEFPQLILDAKVQQILNWKTAVVFVDQTILEENALLVKSIVHESITNHITPISLILYEINDSLRGQQKRVALRQALSQFAPKK

HEEMRQQFLVISAFHEDIIEIAETLNMFHVGNQWMIFVLDMVARDFDAGTVTINLDEGANIAFALNETDPNCQDSLNCTISEISLALVNAISKITVEEESIYGEISDEEWEAIRF

TKQEKQAEILEYMKEFLKTNAKCSSCARWRVETAITWGKSQENRKFRSTPQRDAKNRNFEFINIGYWTPVLGFVCQELAFPHIEHHFRNITMDILTVHNPPWQILTKNSNGV

IVEHKGIVMEIVKELSRALNFSYYLHEASAWKEEDSLSTSAGGNESDELVGSMTFRIPYRVVEMVQGNQFFIAAVAATVEDPDQKPFNYTQPISVQKYSFITRKPDEVSRIYLF

TAPFTVETWFCLMGIILLTAPTLYAINRLAPLKEMRIVGLSTVKSCFWYIFGALLQQGGMYLPTADSGRLVVGFWWIVVIVLVTTYCGNLVAFLTFPKFQPGVDYLNQLEDHK

DIVQYGLRNGTFFERYVQSTTREDFKHYLERAKIYGSAQEEDIEAVKRGERINIDWRINLQLIVQRHFEREKECHFALGRESFVDEQIAMIVPAQSAYLHLVNRHIKSMFRMG

FIERWHQMNLPSAGKCNGKSAQRQVTNHKVNMDDMQGCFLVLLLGFTLALLIVCGEFWYRRFRASRKRRQFTN

>TjapIR93a

MTEPLFPHVSQGFRGINLPVTSYHNPPFQIISQTSSGSLRYSGLIFDILNHLSLKLNFTYTMQLLPGFSPVVTAAAATAAVAKETTAASFMTDNVTSSKLDVPTSHAAQVPPQLT

ELVRKRKVFLGAMAITVSDNLAGVNFTATVSTQTYGLMQAKPEILSRALLFVAPYTNEAWACLISALILTGPFLYLMVKLSPLSAEDRGSLGLATTWQCSWYVYGALLQQG

GMNLPKADSARLVVGTWWLAVMVVVATYSGNLIAFLTFPRTDAPIDSVDDLLGRGNEFSWSFANGSVVENYLSLAAANGDVKYKELFDGATRQETSKAANILESVKRDRL

VYIDWKMSLEHLATSDLKTTGVCNLHVGTEDFLPENLAMMIASDSPYLSLINDAIKRMHESGLIKKWTEDRLPPKNKCHENMKAQEATNHKVNMGDMQGIFFVLAIGFTV

AVAFIGMELAWHRKKEAAERLLIKPFVS

>TjapGluR1

MTINYARESVIDFTKPFMNLGIGILFKVPSSQPTRLFSFMNPLAVEIWLYVLAAYMLVSFTLFVMARFSPYEWNNPHPCLGETEVVENQFTISNSFWFITGTFLRQGSGLNPKA

TSTRIVGGIWWFFTLIIISSYTANLAAFLTVERMITPIENAADLAEQTDIPYGTLEGGSTMTFFRDSKIAIYQKMWRFMESKQPSVFVSDYEKGVKRVLEGNYAFLMESTMLD

YAVQRDCNLTQIGALLDSKGYGIATPKGSPWRDKISLAILELQEKGVIQILYDKWWKNTGDVCNRDDKSKESKANALGIENIGGVFVVLLCGLALAILVAILEFCWNSKKNA

QSDRRAAGHAVPMTAMKKSLSYDQMTVDLSNSNEGIS

>TjapIR25a

MPSSSSSSSSSSSLIWTLVCVGLVHLIITPGIRAQRGGGGDDSANIPVRPINLLVINDFDNDLANKSVSNSLKALKDKSPDKLGQVYVALVNISDGEETINSVCSVWKSALRSNP

DEIPDFVLDVTTFGAGAETVNRFTALLGIPTVSAQFGQEGDLLGWREITEEQKQYLIQVMNPADLMPQVIRQQCLEFNISNAAILFDDNFVMDHKYKSLLLNVPTRHVIVPT

REAGEPLEQQISRLRDLDIVNFFVLGDEATIAAALAAASRLNFTGHKYGWFGISLVQEFSLRCQDCSSMSLMLFKPKQSQNQQQLNELMSKGLLQIPLIMSAFYYDLAKLSV

LAMKSALDAGEWRRPRYVDCDEFNENVTVAMRNVDLRRRLRQVSGGSGFSPTYAGFHWGNKNGENHAKFDVDVKLWIIKDSRVVNEDQVAYWEAGIDNKLKVEKPTMAADHTAVTSYRVVTVIKPPFVMRDNVTGNWSGYCIDLLNQIRDLVQFEYEIREVEDKEYGNMDEAGNWNGMVRELKDKKADIALGALAVMAERENVVDYTVPYYDLVG

VSIMRRKPKAATSLFQFLTVLETDVWLCILGAYFFTSLLMWIFDKFSPYSYQNNREKYKDDEEKREFTLKECLWFCMTSLTPQGGGEAPKNLSGRLVAATWWLFGFIIIASYT

ANLAAFLTVSRLDAPVESLEDLSKQYKIQYAPIINSSEYRYFERMAAIENRFYEIWKDMSLNDSLSDVERAKLAVWDFPVSDKYTKMFQTMKDTGFPKNLDEALERVRAED

KTEFAFIGDATDIKYLVMTNCEFMQVGDEFSRKPYAIAVQQGSPLKDQFNNAILMMLNKRKLEALKDQWWNKNPLKQQCDKADDQSDGISIQNIGGVFIVIFVGIGLACITL

IFEYYYYRYRPQARQRHRDRSSKTKFAPGGISGKPMKFNLRPAPTQSFEQSADTDSGGHRSRY

>TjapIR21a

MMANYLNLTMEFSSPRSSGLSPLESTKQDLLLGLTSSAVGGIYQTADLYERFDTSMPLLDDCASFISLASTALPKYRAMLGPFQLTVWLMLCASYLALVVPLSFNSKYSKRQ

LLRQPGAVNAIFWYIFSTYTNSFSVENPLLDYGIAKNSTTLLLAIYWLFTIIVTACYTGSIVAFITLPVYPEAIETAAELQAYRYRIGTLDHDGWNEWFGPDNGQEPLLDRLFRK

MEYVPSLMEGVRNASRAYFWPYAFLGSRAALDYLVQTDFALARQSKRSLMHISQECFVRYNVVQLFPRNSLYTSYADGFVLRAQQSGLLDRMRNDVDWQVQRAAINDN

KQVSSTSSASSFSLFT

>CvesIR1

MFNNVFLYFLIVPSVIAFSKSIILGGLFPEEDLSKQAFELSINAVNTIRAETDESDDPFFKPEVITIGDDVFDISQGVCALAGQGVAAIFGPEDTISSIHVQSMCDTMDLPNLVAR

WDSNLLRMKAINFYPHSETLPLIYLYLVTEFKWEKFTILYDSTEGLIRLNRLLQRWDTKGYPVTLRFLGEGPDYRGILKQVRNSGEENIIIDCHYPALEEILKQSQQVGILSER

HKVIITSLDLQTLDLDPYSHSGVNITGVRLLDPEDPDSVSIFNDYLADMGLEDLSKMRTEWALIFDAVQLFSRAFEQLEEAVEVEVKELACDGVDNWEHGASLGNFIRATEM

KGLTGLIKFHTNGFRSDFKLNVVRLTTDGLRTIGNWNSTGKIEWIPEPPPALPNGLIDLANQTFTVLISLLDPFNMLTESAATKSGNDRYEGFAIDIIHELSEILHFNYTLVEQLD

KATGGYDEKSKKWTGMLGKIIDGEADLAITDLTITSEREKVVDFTMPFMHLGISILYKKPKKAPPSLFSFLSPFSGAVWIALFGALFFTSLIAFIIGRICSPEWNNPYPCVENPTE

LENQWTFSNCLWFTIGSIMQQGSEVAPIAISTRMLATAWWFFCMLMTASYTANLAAFLTVETIVRPIKSAEDLAALNGDIPYGAKKNGATYKFFQGSNYSTYATMYKYMSE

HPEVLTESNDAGRDRALKEDYAFLMESSSIEYISQRFCDLTQIGGELDNKGYGIAMRKNFPYRNLLNTAVLQLQESGILSELKKKWWNEKRGGGGCSDESQGSAAQELTLD

NVGGVFLVLVVGVSITLLISAADMVSDVWGYARKENLPFKEELKKELAFFIKCRGTVKPSRSARRSSSQPDSSRGDTPPYGFVPTVITSPHSEEP

>CvesIR25a.2

MDNFRWCTIFGVLIFWSWFVFTEQVVQQPTGLRPVNLLVINDQENDLANQSIDIALADIRAKDPTVLGNVIVVQLNESEPKEALDQVCGVWNSTVKSGTSGVPDLVLDTTR

SYIGTKTVNIFTAFLGIPKIAARYGQRGDVKHWEDLTANQTNYLVQIMPPVNLIPKAFRQLDCEKNVSNVAIIVDDAYATNRIYKGLLQNISSQHIVVQAETDNPDIEQQLDRI

RDLDVVNYFVLGNENTLTNYLDVADDKNLTGCRYGIGSNQAHLRSLTAQNLLPPVWLTVAFYYDVVRIGVGAMKSAIEKKSWPTSLEPRFITCEEYNGNNTPSHNFDLLGE

LRNATTNKLEPTFTRFHWGENNGEHHAEFNIRVNMVVINDGNSIFSDDLGLWNVDIRSPFTSKSHSALVHYAPVPTYQIVTIERPPFIEFNKETKKWEGICIDLLEEMQKYTKF

NYEIYTSPDGEYGSLDDDGKWNGMINELITHKADVALGALSVTAAREYVIDFTVPFYEPVGYSVITKRRLDSTSLFVFRKSMSWKVWASSFVAFVSTSVLIYIFDRWSPYSFR

NDPHNRSVTQHTRIFTLRNSFWYTLSCLSPSGGGPPPKNFSGQILACSWWGFGFITIAAYSANLAASTTVGRLQPTIKTWDQVREQFKIQYAPIKDSNAYKYFFGMKAIEESF

YDIWKGISLNDSLTDRERAQYAVWDYPVDDEFSRIVSHMNEYGYPKSKKDALNRMFGLPPYRNNSNFALIAESTELRYWALTNCSFFLFEGEFTKKPYAIAVQQWSPIKDLF

DHALIELEKNYTMERLKKKWWDNNPKRVFNCPERINRSEGLHIGNIGGIFIVLAVGNVLGFLLVILQYWWYCIRSRTRLRKLLENGFSLDKVKPKKFKVKPKLRKITREDKN

SPAGIVVEEL

>CvesIR75u

MKLFVYKIFFCLFIASNSHEIDQVAETFIVDMIKAIRAPLTVTGFFCFSSNLKLSKKLSQNNIINDIKNLISHEYDFEENQELKLSHQNLYILDLDCPDATELLLKAEDSEMFVAP

TRWLILQDIKNNNLSQIDLKKQFDDLGIFPDSELYLAQRLKNDSINILSIYRPSIYVNLIFEYRGNWDALNGVNFMDSIPASQRRRNLHLTPLKTCLVLVNPDTLNHLTDYKDK

RIDAVTKANYIWMMHLVNRINATVTYTWRNTWGYQDQNGTWSGMIGLLDRNEIDFGGTATFLIKQRIGVIEYLHLYTPVGSKFVFRKPPLSYVSNLFTLPFGRTVWYAIAV

MTCVICGFLYITLKWEWKKTLESEENTRHPDDLQKDPSLSDDLLILSSAIFQQGLSYEPRTISSRIITLMLLLAALSLYASYTANIVALLQSTSNSINTLKDLIQSGLKFGIYDIVY

NRYYFGALDDPIRREFRERFVTNKSSVWLTMEDGIERVRKGLFAFHVDTAAGYQLMQETYDEDEKCGLQEIDYMGVLDPMLVIKRRSPYREIFKVGSLWLREAGLQQRDT

PRLFTKKPVCVGQTSFISVGTTECYAAFYTIIYGVAIAFGVLFIEIIYHRCFESKTDDSSESENDVENVDQLQEESRQTSGESLEVIE

>CvesIR76b

MIGLELMLAGIYALTSNNTLNYTLDHRYRWEVSLDDVVSWNYNKTKAAELYDGGLPEELLVTTWDEGPYSSYNNVNGKIIGGGYAFQIFDIIAKKLNFKYRIIPPEDLTVGN

NETGMISMLNQSKVDMAVAFIPIIPEYMNFVEFSPILDSLEVSVLLERPLQSAIGSGLLAPFSKTVWICIFVSLALVGPIIYFVTSFRTWLWDRTNKDRYSFIDCVWFAYGAILKQ

GSAITPEADSNRLLFASWWIFITIITAFYTANLTAFLTLSEFTLEFTSVKDIYNLRKSWTAQRHYIIDITVNRNDPGELEPLKKSLNKTRGMFYNITKEDNKAKKVAGYVTNDRL

FIDEVQFVEDFIYRDYLNRTRLNMIEKEKCYYIKMPNSVYEQNRGFAYPLNSRLRKIIDHQLLHLVETGIIKHIESVNRPMVTYCPLDLGSTERRLENRDFKLTYEVIATGFLL

ALICFIVEVSQHYFKCRVCLCCADSCTCCKTRMKVQVSPAKRPQLPLPPLPITKGPIKTEFSAFPQPQLPIYDSIDNVISSKTRFINGRDYFVIKGITGEKRLVPVRTPSALLFQY

TN

>CvesIR21a

MRIFFLIIMLSAVVNSNDQLDNNRRKVFNKKLSDSSARTESLGRLLKHIFREYFNGCIVIMMYDDKIYTEYPGLLNMLNEELSSVSFIRRNFNNSQSESSDKLQFKCYNYLLF

LNNIYTLQSTLSRQNHKKVVVVTQSTPWTVKEFLKSFPSRSYNNLLIISHTMSERTEPGSYLLYTHKLYADGSGASYPTLLTSWIRDHSTQKAIDLFPEKLTGGFKGHRLLIAT

AHQSPFAIRTGIDWDGIDIRIVKLLSKTLNFTADFRDPVTINSPIYAATTDVITGKASVAAGGIYKTTNITSVLDTSASHMEDCAAFISSSSLALPKYRAVMGPFQPSVWVLICIV

YFIAIIPLTMNTDYSLSSLITRPGRLIHMFWFVFSTFTNSFAVKDPLTVNGFAKNSTALLIGFYWAFTIIITSCYTGSIMAFITVPMFPESIDTIDQLLDEGYDVATLDHDGWEKWF

NWSTIDDPVAVKLLKSLEYVPTIEEGVRNASSSFFWSYTFLGSKMALDYLVQSDYTPSWSTRRSTMHITKECFTNFGVTLVLPKDSIYTQTFDTVIMRARQSGLTQKIIRDVE

WDLQRTAEGTRLPISEDYKRRKVIIEERPLALDDTEGMFLVLGAGILIASLVLGIECCLKRLKKKHTVADAGTTFTSLATTPRMSFLTVPNQPWDIESSNCSPRPRRFIRGSI

>CvesIR68a

MWSLSENYLFPRRFKNVSRIEEMEHQSGIVDLEGRELQVAAFFNPPLCYLFTAINRTVNGINGQFFTAPENEIDGIETILFVIIAERLNFTWLIRKPNDHYRYGRPNGTNWNGG

MIGQLFRNEIDVAFSGIWLKHDHYRFVNLTKPWHQLFINYLVPRPKHRFSFWALTRPLTPGVWLAIFGMIFLHSLNVYTKAWIIPHAERRYRSYITTLIELIARLVGTWAPKRV

QGFKIQTMAWHMAGILIVTAYSCSLATDLTFPDFEKRIDRVDQFILENLTWGRESPVPKFDDYFNLNVSYFIYIA

>CvesIR64a.2

MNLRKGIFLLPLLIRLIKCDQFLENFTRDYFDSIHVYQLIVFGCWNLQEAYDFAKNVMRQEAKVSYNEIRDNINLESTLRLNAQTLGVILDFDCPSSDLILNQFSRQLAFNESY

RWVLLTESLEFPTPSLKDLPLSVASEMTVAIRQNNTYKLYDVYNPSYRHGGVINVTLMGYWTPEHKLVNNFKHQFKYHRRQNFNLLPLNVSVALVNEPKPDLETYLTTPIDI

HLDTMSRFTYQIVLQLQEYYNFSINIKRDKSWGYKVNGSFNGIIGDMEKGIVDISSTPFQLKRERLEVIDYTVHVMTIRTVFFFRHPKKDDMQNGFLKPFDSSLWYIVFGVAGVYWFILFVTTKVESHVKNIKVPDNSLMSLPATETNLITMAALFQQGANDSPRLISGRIAFLSLFVWTLLLFQFYSATVVGFLLAPPAFWITTLKNLTDSSLSCGMEDMDYYR

DFYATTYLETAIEMHEKKIKPTKKLPRGSYYPAVEGLLKVRDEPFAFHIEDTTAYRIIEDLFTEDQICELQEIPIRAPREVYVGVPRHSPFKEIITYGCRKSVEHGLANRLRQHW

RYKKPPCPESHSSKPMPVMMKEFAPALMFLLFGFGLSVFILFAECIYHAKFDRDSNESDNQSITPVQSAGTAEQHIEKKFDHDETVSHFSA

>CvesIR8a

MTHTGWDNVRDIVINNSIIYLRSDGSIIPFTQATDDLLKKKNATDFALIFENPSDVDPALFYLLGASRLRLVIIDNFNNASMHKLRDMKPQPSHYMIYSSTKGMEKLFQTALA

GNLVKRSGVWNLVFTDMDYKNFRYIKGPEVLEHSVGIFSMNVSICCSLIEKLTCDCPPDFKIFDSYIQLLINQLVVTLVMINSEPGAKLKSIKGTCSPNHPEQEDEIIQKFKNAI

MTVTDKTIALEYMPKSSIVVYRAVIDIEILNNGTLTPLAEWTKDSLTPFPGQVIVASQPHFRIGTTASVPWVTIHTDHLGRPLEDANNRVIAEGYCIDFIEELSKKMKFSYDLIV

PKDGKFGEKSEDGSWNGLVGDLANGKTDIAIASLTMTSEREEVIDFVAPYFEQSGILIVMRKPVKETSLFKFMTVLKSEVWLSIVGALVATALMIWILDKYSPYSASNNKQLY

PYPCREFTLKESFWFALTSFTPQGGGEAPKALSSRVLVAAYWLFVVLMLATFTANLAAFLTVERMQVPVQSLEQLARQSKINYTVVNNSNAYQYFSNMKNAEDTLYRVWK

QITLNSTSDQSEFRVWDYPIKEQYGHIFQTIKTVGPVANASEGFEKVLESTKAEFAFIHDSAEIQYQVTKDCNLSEIGEVFAEQPYAVAVQQGSHLQEEISRAILDLQKDRFFER

LSAKYWNASLKDRCPNMNENEGITLESLGGVFIATLFGLALAMITLGIEVLYHRRKNNLDGDKAKEANGRHVKSPVSKLMKPKLHHFKPTPTVAFIGRNRGLKPRVSHISV

YPKTFPYKD

>CvesIR64a.1

MKLSLNEMKSRLSTYWLFIIFLTLSFSSSKGHEILAKFTRDYFRNLYINQIVVFGCWDKYDSLKFSKSIIMDPEIKLIYESIDDNIDLDKLLHVDYWKLGIVLDLDCQRSKIIFD

QFTEQHLRHNESYFWLMPTTGEKIPDYFYNLPLTIANEMTLAIRRDENLYNGNNTDNNNKIIYELYDVYNPSYRHGGKLNITYMGHWSLNDRNEGILKILLTQYKYKRRGD

LQGLVLNASIVIDFPAVPDYNTYIHNPINPHLDTMHRYNYALTLQMRDYYNFTMNLQRGKTWGYLVNGSFNGIIGDMLKGLVDFGATPFQYKPERLDAIEYTVQTWVARPC

FIFRHPSTNDLSNPFLKPFENQVWYYIALFGAVNWIFLYTSVKLEHWLVMKKPQMTLDTYPASEILMIVTSAMAQQGLSDGPRFYAGRIVFIFLFMWGFLLYQFYSASIVGSL

LAKKPRWINTLQDLADSNLEVGIEDIAYNYDFFATTTDPVALQLYRDKVAVNKKRKREPYYSIEDGLKLMQKGGFAFHVDVATAYKIIEETFNTGEICDLVEIQLFPPKHTATA

TARFSPFKKMVTYGMRQIVEHGMARRLRNVWMHRKPECPESHKSDPVPVMIPEFSPALFLLAFGFFVALCLVLGEKIIMRHQKIRDMNDDDNDDSVSDQKTGSTNSASSQ

KQEELNSDKIDI

>CvesIR2

MTLSGKMALLASLTFALVMYNAYAGFITSILSVQATGIKTLEDLLQNNFKVGYSDLDDEFMRNTNDTNLRKLYINAFNTRESRIDTNQGLQKAVKGSYGFFASATLARRTLR

TSLIQERCSLKEIEVGQTFTVVALPMEKFSPYEKIINLNILRMLERGVIDRIGDRMLPDMPKCRDPTTFHSARIADVYSAFIILAIGIVIAVCIGLVERIWSRRLKFKNKLRQIIDIY

LRKKRTSEVHTNKNNPKEFLNDYINNINCNLHFKTYKRRLRHSSSRVKKFNPKVNYDC

>CvesIR25a.1

MSNWYWWNFILTFIVADCSVVFAQQNQQPTNPRPLNLFVINDEENDIGNNSVKNALVTIKDKEPTVLGNVIVVQINGSDPKAALDKICAAWDPAVRDGGPGVPDLVLDVTR

GGYGAETVCSFTAAVGVPTFSAQFGQKNDLRPWLNLDFDQQRYLIQIMPPADLIPEAIRQLCSDMNITNAAIIFDTGFVMDHKYKSLLLNIPTRHVIVRAKTTDKEVNDQLQ

RLRDLDIVNFFLLGNEDTLIKYLDIAEMKNFTGRKFGWYALTMTEQPDLKCNNKNISVLLFEPKLTSSNQQHLSFLTNQGIIQKPYLASAFYYDLVRVGVNAMKSAIKENAW

PNVPSHITCDQYNRNNTPSRDGFNLLKWLMDTTKSGFEPTFAGFAWDKRNGEHHASFDMSINMKVIDNGNVISTTSMGSWSANVDTPLNITAYDAVGSHTAITSFRIVTVQIAPFIYINETTHEWQGYCIDLLKEIQGIMNFEYELYESPDGNFGAMNEKGEWNGMIKELIDKRADIALGTLSVMAERENVVDFTVPYYDLVGISILIRKKKEETSLFNFLTVLN

RTVWLCILGAYFFTSFLMWIFDRWSPYSYQNNREKYKDDEEKRVFHLKECLWFCMTSLTPQGGGEAPKNLSGRLVAATWWLFGFIIIASYTANLAAYLTVARLEQPIESLDD

LSKQYKVQYSPIKPSEAYTYFERMAAIENKFYEIWKDMSLNDSLSEIERAKLAVWDYPVSDKYTKMFQQMHEAGFPKTKEEAIDRVRKKLEAHNNTEYAFIGDATEIRYLE

MTTCDLISIGDEFSRKPYAIAVQQGSPLKDQLNNAILKLLNQRKLESFKSKWWSRNPNRRNCEKESSQSDGISIENIGGVFIVIFAGILLACCTLAFEYWYYRYRPRVNAKKQR

KANAQDGNKIPSQRVKPTRFNLKPARKAFEDNGTEFRARF

>CvesIR93a

MNISGLSIHLSQDTGINLKQDYTILLSVTTCKVAWELFKRARAEKLVHLAITDLDCPRLPINEAITVPLVDPGEELPQIFFDMRLEQSLEWNRVNFIHDSNQPITKVIQAFSTDF

PKKLGLASQSLSGFTRGRSEVATRRSIRDLLTKFSSRKALDQQFLVIVGHKFVSLIIEVARSLGLLHPRSQWLFVIPDMADHNKGNVSYLLDYLEEGENLAFLYNSTKKNGTH

CSARAFCHARELVGALTVALEKVLSQELKLYEGVTEEEYEASGINKLIRSRNIINFMRNELYNESRSNGQRSSCSSCLTWNLDSAITWGSRLMSKTKKPSFKLQKTGSWTSDP

GFEALGFIFPHTKFGFLGKELEIATYHNPPWQFEILETDNHFNVKSRWDGLMINILNELAKNLNFTIKYLVIKVPAEAMLAKSDSKNSAMSAADKVPAALTDLVKTGKVMM

AACSFATSMYVNEKNINFTRVITSQSYGILAPRPKAMTRTLLFTSPFSNEAWACLASSIVLVGPALYFVHALSPRKADEQTRNPESTEMLGLGSPSRCIWYIYGALLQQGGMH

LPSTDGARLIVGTWWLVVMIIVATYSGTLVAFLTFPRMDPAVNTVDDLLARREEFTWSIPAGSLLENFLEISDYQQLLPEFDRHASFHETASYNENVEKVKARGHVMIDWTT

ALRISQRNHQINFGACFFSIGTNVLELVEPIALAVPKGSPYLGIIDQQLQRMQESGLINKWLDNWLPNPGDECSDDKMENQGTSNHQVDFYDMQGIFFVLFIGYLTGSVALLS

EFYKQHRKSNKERKLIRPFLD

>BterIR25a

MRLVGFTIAVCGFLQFCGESAVYAQRNVVGNRGSTKTRAVNLYLINDEANKVAKSSIIAALETIKEKYPNYLGEVWSVQVNESDVNDTLDRICKPWDSAVKEGGTRVPDLVI

DTTTAGLGAKISNSFTAALGIPTLSAQYGQEGDLLYWRNLNTDQESYLIQVMPPTDLIPEAIRQLCIQLNITNAAILYDHNFVMDHKYKSLLLNVPTRHVINEASQQVMEMR

TQLPRLRDLDIVNYFILGDENTINIALEAAEALNFTGKKYGWFLLTPQLNVWPRCECRNMNILFMKPEFNKKSPIESSLSKPVISSAFYYDLIQLGVRAMKSALDDGEWPIEP

RHITCDKYDKTNTPERKVNFFNRLKETYKNMTPTYAGIKWGSKNGEHRANFEMSIHLVDIKDGIVSNTIDSGSWNASISAPLQITNNDVMNTTAVKSYRVVTIIHPPFVMYN

EENGTYYGFCIDLLDEIKDTVGFQYEIRETEDRRYGSLNPNGSWNGMMRELIDKRADIALGSVWVTAERERVVDFTVPYYDLVGLSIMMLKTKTTSSLFKFLTVLENEVWF

CILAAYLFTSVLLWIFDRWSPYSYQNNREKYKDDDEKREFNLRECFWFCMTSLTPQGGGEAPKNLSGRLVAATWWLFGFIIIASYTANLAAFLTVSRLEIPIETLEDLSKQYKI

QYAPVINSSAYIYFKRMAAIEWKFYDIWKEMSLNDSLSDVERANLAVWDYPVSDKYTKMLQAMEEAGFPASTEEALRRVRRLDSNNEFAYIEDSTTIKYLTMTNCDLIQVG

EDFSRKPYAIAVQQGSPLKDQFNNAILILLNKRKLEKLKDTWWKKNPDRKDCDAENSQSDGISIQNIGGVFVVIFLGIIFACFTLAFEYWYYRHRTKITKINLNSTTKGKVTQ

VKPLRFNLQPAPTHGFQNSQLRPRF

>BterIR93a

MISVLLLLWCVNYGDSYNNFPSLITTNATMAVIIDKSFFDNNGDHRNVMGVVHDLIINTVKKEMHIGGIVVRIFRDADVNLWQGYTILLSVASCCITWRLHEVARKEELIHL

AITDPDCPRIPETDGMSMPVVVPGEELSQIFLDLRMMNILPWNVINILHDDTFDRDTISRVMTAISDKLPNKQVNLISRSIFTLKHETTRSERKSSVKKTLNDFHVEQLGHCFL

VIATVDMIADVMGVARSLKMVHPGSQWLYVITDSASKNMTNMTAFVDLLAEGGNVAFMYNATNLSNYCEIKLICYVEELIQALAKALEYSLTSEIDLFKSMEEEKFEMIRL

TKRERRAELLKNIRIHLSQNAFASEGFCGRCLLWRFSSSITWGNFFSRGRNMAHLLDIGTWSPGFGVNLTDVIFPHIAHGFRGTNLPIATYHNPPWQIISVSKTGQKLYEGLVFDAINYLGSKLNFSYTAITPEVTRNSNSWNTSRYAKLGEKIKEMTMSATRKVPKEVIDLVREREVLLGACAITVNENKKDAINFTVPIFVQTYSFLTSRPKQLSRALLFASPFTK

ETWACLAVSIIVMGPILYLVHKYSPYSIKTSGLKSSFQCVWYVYGALLQQGGMYLPHCDSARILIGVWWLIVMVVVATYSGSLVAFLTFPRMDASILTVDDLLARKDGITWS

FPNGSFLEMYMQETDEPKYHTLLSRAESHNDTEEEKLVERVKDGKHALIDWRSSLRFLMRKDLLLTGVCHFSLSMDEFLDEPIAMIIPHDSPYLPVINAELHRMLESGMMN

KWITERMPIKDKCWEVPGSNQAVNKRKVNVTDMQGIFFVLFMGIILAFFFLFCECYCHRRKISKERKLIHPFVS

>BterIR21a

MILVTLFLQIILVSGKSVFYKEHQCENSGNNLKSVVEEIVEEIINQRNCIVFVSDSVYRNLVDVKNIKGSSTVLKYEIALRDNEQFLQPRRRVQRILIDGKAVNCSAYIILIANGF

LAAEFLQYTERERLINTRGLFLLLYDSRLFRSHLHYLWNRIINVVFIRQYNAYKYRSGEKASKERIDLDTVYFPFRKRKSIVTKYIDTWYKGKLLYGTNHFTEKITNLQEKHL

QIAVFEHIPAVTTKSRTYYNKQPNNNTEGLGIEFELMQIISKAMNFKPKYYMPDNITLEKWGINEDNQTHVGLVGEAIQGKAAFYLGDLHYTLHHLNYFDLTIPYNTECLTFL

TPESLTKNSWKLLILPFKFYTWIALVLTLILGGVVFYFLSISYKKHISLYKNQMHFQNTSMKKEIKGLYLFTEIENSILYTYGMLFQISLPSLPSSWAVRVLIGWWWIYSILVAVA

YRASMTATLANPVARVTIDTLEQLAKSSIEVGGWNKENKNFFSMSSDLSSQEIGNKFKLIQEEDKAIEKVANGSFAYYENSYLLQHVRVKRQILEKEQKENITTVDISSKHNL

HIMEECVINMPIALGLEKNSPLKPRVDTLIRRIIEIGLVEKWLSDVMEWSKIMEIRQEAESEKALVDLHKLQGAFIAIIVGYILAFMVLIGEILYWKHIVLKDPKFDKYHLDIFY

SINNPKI

>DallIR8a

MLNLWVVTAIALSFFSYCAESQSQIKLLVVVENLDDGVLKLLNDVIPAAEKAHESEKVSVDVKSVQVDRHNVEGSFQQVCAVLFDGITLVLDITYTGWDRLQALAHNNSIL

YLRTGGSIIPYVQAIDDLLLKKNATDVALIFENTRELNESLYYLIGNSIIRLVVIDDLSEVTVARIRLMRPSPSYYAIYSSTAKMESLFKTAMSGGLVKRHGIWNLVFTDMKYRE

FPYIAGPDTLNTMVGILSMNPSVCCRLIREYPCTCPHNFEIFPKFFERLIFLLVSTITQIQKSGIDVEPIKGQCITTDESPTIDPEKNATLWTFYTTLTTKIESDNDVFEFSKDRYLI

RMRAEINLETLEGGNLEMLGNWTKKNGIVAAPGKDIQPAKRYFRVGTAEALPWTTKKKDPVTGEIMKDKDGKIIWEGYCIDFIQKLSEKMNFDYDLVIPEDNSFGHKLPSG

KWNGLVGDLSRGETDIAIGALTMTSEREEVIDFVAPYFEQSGILIVMRKPVRETSLFKFMTVLRVEVWLSIVGALTLTAIMIWILDKYSPYSARNNKRIYPYPCREFTLKESFW

FALTSFTPQGGGEAPKALSSRTLVAAYWLFVVLMLATFTANLAAFLTVERMQAQVQSLEQLARQSRINYTVVANSTTHQYFQNMKNAEDKLYNVWKEITLNSTSDQVEYR

VWDYPIKEQYGHILQSINTVGPVKDSKEGFRKVIESEKAEFAFIHDSSEIKYEVTRSCNLTEIGEVFSEQPYAVAVQQGSHLQEEISRKILDLQKDRYFETLSATYWNASLKGTC

SVADENEGITLESLGGVFIATLFGLALAMITLAGEVIYYRKRNAAEGIKSKEANGEHVRSGEDKLTKGRLGFKPAPTIAFIGKPHTGPRARISHISVYPKNFPFKE

>DallIR21a

MRVANYIFIILLIFTRLEIIGSHTAHMRRSMKVDLRTDSLDRLLSYILKEYFGGCVIIIIYDDKTIEQQPGLLQGLYTSFPFASFIQKSTNTSLGQVPIIFKDKCYNYMIFLDDVYYI

ENVIEEETVNKVLLITESTPWTVKEFLKSFISRSYTNLVIITHSMSRRTEEGSFLLYTHRLYTDGSGSSKPVLLTSWIKDHMTHKNIDLFPEKLSGGFRGHRLLISTAHKPPFAIRT

DRISLGQIGWDGIDIRMIRLLGKVLNFTADFRDPTASTSPTYAALMDVEKRETTLAIGGIYRTNNVTTRFDSSFSHMEDCAAFISEASLALPKYRAIMGPFQGAVWALVVIAY

VIAVIPLATNTNYSILSLVTHPSRFMHMFWYVFSTFTNSFVVKNPLLDTGIAKNSTSLLIGIYWVFTIIITSCYTGSIMAFITVPVFPEPIDTAEQLLKKNYDIGTLDHDGWEVWF

NWTKIDEPVAKKLLKNLQYVSTVKAGIGNITQAFFWSYAFIGSKILLEYIVQEQFTPSWATMRSPMHISKECLLNFGVTFVLPKNSIYTEEFNKVIIRARQSGLAQKIIRDVKW

DVQRTAEGLLLPVSEEYKRRKIPVQDRSLALDDTQGMFLILGAGTLLAFLTLSIECCVHLWKKRYSNDVGHTMDGSTVVSETITPKMNHFRGLDMWAPDGSTSKRRRFSISS

I

>DallIR25a

MTTLQNQCEKHQFRTQITTKHIDEAVWNIVINDEMNDVANRSVNNALKNIRDSHTDWLREVIIIQINGSDPHDTLDKICTAWDRAVRDGGHGVPDLVVDVTRSGFGAETVN

SFTAAMGVPTLSTQFGQEGDLRHWRDLKEDQKGYLIQVLPPADLIPEAIRQLAITMNISNAAIMFDENFVMDHKYKSLLLNVPTRHVIVRTKEVGAIDAQLSQLRDLDIVNF

FVLAKEEVLTAILDAAEAKNFTGRKYGWFALSLDEFIPKCECKNLSILFFQPQSTSFSQEQLGGLTSKGLLQPPLITAAFYYDVTRLAVQAMREATKNNLWPIDPQHITCDEFS

GNNTPKRNFNFLEKLRNVNREVQFEQTYAGFHWGSKNGEHRANFTMKMSLAVIDDGNAISTNVLGEWPAGIDSPLKMLNHTAVKSFRVVTVITPPFVMYDPETDTWSGYC

IDLLENIRNILKFEYEIREVADREFGWMKPDGTWNGMIRELKDKRADIALGALSVMAERENVVDFTVPYYDLVGISILMQKQKAETSLFKFLTVLENDVWLCILASYFFTSF

LMWLFDRWSPYSYQNNKEKYKDDEEKREFSLKECLWFCMTSLTPQGGGEAPKNLSGRLVAATWWLFGFIIIASYTANLAAFLTVSRLETPVESLDGLSKQYKIQYAPIRPSQ

AYTYFDRMAKIETRFY

>DallIR64a

MHPRWWILVVLLPQCSTGSDDVTGGLTRDYFGGLLIRQIVAFGCWDSEEGVKFSRLIMGDDHSLTYVSIQDDLDMERILKVNYYRLGIFLNLDCPGSEKIFDQFHRQQLRHN

ESYFWLMPTTRTGLPKYFEHLPLNIATEMTAALKKSDGEYTLYDVYNPSYRHGGELNVTRMGSWSVKNGLNIELTEYKYRRRGNLYGLGLNASIVVDHPAVPDYETYIHNP

INPHYDTMHRYNFALTRQLRDYYNFTMNLSRGTTWGYLINGSFNGIIGDMIKGIVDFGATPFQFKPERIDVIEYTVQGWLARPCLIFRHPKKNNLSNPFLRPFEMKVWYWIA

IFGIVLWSALYLTVKVETKFDPQKSVNTIDTHPASETVLITAAAICQQGLSDGPRCISGRITFLTLFIWGLMLYQFYSASIVGSLLSGSSNWITTLQDLVDSDLEVGIEDMAYNH

DFFATTTDPVAQELYNKKVAISKKRKTEPYFSAEEGIKLIQKGGFAFQVDVATAYKFIEETFNVDEICDLVEIQLFPPKHTATGTAKHSPFKKMITYGLRKVMERGTPRRLLNIW

MHRRPQCPESHKANPLPVVLTEFSPALFLLIIGIMFATLVMAVERTFLSFPSLNLLDPESR

>DallIR64a.2

MRHDAAVSFNSITLNMNLEIILKVNYYHLGVILNLDCPLSDSVLHEFSDQLVFNETYVWLLLTTAPSPPSNRLRHLPLSIDTETTVATRDGNKFTLYDIWNPSYRHNGLFHVV

YKGRWSPEEGLINELTQYKYTRRNFNLTPLNFSITLRHPPLPDLETYMTTPINPQFDSMHRYHYALALILRDIFNFTINLHRASSWGYMKPDKTFDGILGDIAKKVIDISISPFR

YRPERFDVAEFTVQTLLVRSFFIFRHPSSASLRNNFLKPFANELWWMILMVSIVYWISLLITIRIQKHYDESRSSLMVPASEATLTTVAALSQQGVSDDPQIISGRIVFLSLFIWG

LLLFQFYSASIVGSLLTTPPHTITTVKNLTDSDIDCGAEDVAWAYDMFKTTPIAEESELYEKKIKPFENTPKNKYFSIVKGMQKVQKGGFAFYTESAPAYKQIKDTYHEDEICE

LQEIQSHPAREVTMVTAKHSPFTKMVIYGLRKIVQHGLSAHVLETWYAPRPRCPETHNSKPTAVKFEQFVPAIFLLLMGMSVSIFVLGIEYLYFYQTEDASHFHQEYSARATQ

TNPTPEHCTEEY

>DallIR64a.3F

KSDRILEDFVRDYYEANNVHQIIVFACWNDFDAFQLTRNVMKFDTTVSFIPIPSAVDFEKILQVNYYHVGVMLDLDCAESGKVQEEFSKQLVFNETYLWLLFTEALTPPTIRL

RQLPLSVDTEMTVATCEGDKFDLYDVYNPSYRHNGAYNVTYKGQWSPETGLIDVLTQYKYKRRGNFQLLPLNFSIVLTNPPKPDFETYIRTPINRQLDTMSRYHYSLVLLLR

EMVLHXSATPFQYKNERFDVAEFTVETLLVKAMFLFRHPKDATLRNNFLKPFTNDIWWMILAVGTVYWVSLWITVKIQIHYNESYMNRKEARGAFEIPGSESGLIALAALS

QQGLSEGLQIISGRIVFLFLFLWALLLFQFYSANVVGSLLTSPPRTINTIKNLSDSQLDAGTEDILWIYDYFNNYFQIMKTPSHIELYQKKIKPSSKRPEGSFWTAVEGMQKVKK

GGFAFYIDTATGYNLAQDMLEENEICELHEMPMITWAKVTLLTAKRSPFKKMIIYGQIVQYGLMIKQFSIWYTPRPKCPESYSSKPIPVGLKEFVPAIFLLLIGVSFAVFVLIIEF

LHFWR

>DallIR64a.4

MKVVALFLLAITLIKFTKSDKILAEFIRDYYGSCDIHQIVIFACWNYAADISQSVMGLDTVVTYQSTMNDVDVTTILRIAHFQVGVVLDFDCPFSKNILDKFSNQLHFNDSYY

WLVLSRLTPISVNFLQHLRLTIEAELTFAVREGDTFKLHDVYNPSYRHGCDVVIVDKGKWSPGDGLSNKLTQYKYERRHLHGVTLNFTVTVANPVDVDIVTYLSSQKNRGL

DPMQKSHYNLMLFLQYLYKFSITVYLSPLWGILVNGSYNGIMGDMVSNEGVDMSISPFEFDWYRLHVVEYVVPTWFTDFTFSFLHPTKSTMRNNFLKPFTQDLWWAILLV

GAVYWVLLLLSLMLEQHHETGRQNINAGAVETGLTTVAALSQQGLSDSPHFPSGRITFLSLFLWALLLYQFYSASIVSSLITAPPRWIKSLKDLTESDLEVGAIDVSFFRDWFKI

TNNSDIRDLYNRKMNSSVSNWPNAFMSVPAGLKKVQEGGYAFLTETASTYRIMRETYSEDEICAVQEIRPQPRNKMSPILPKNSPFKKMITYGFTKIIQSGLLAHVQHYWRG

SVPECPESYSSMPTAMGMKEFSPALFLLCIGAGISIVTLLIEYFHFYLEDQRDRATRHLEELPQ

>DallIR64a.5

MKVFVAILIAFALIHACQSDNILAVFMRDYYKACDIHQIVIFACWENAAHLARNIMGLDTVVAYQSITNGVDLRNILLVNYYRVGVVLDFDCPFGESILDEFSTQLHFNESYH

WLVLSKFTTIPVNYLGRLSLTIASELTFATRADDVFKLYEIYNPSYRHGGAVRIITKGEWIPGTGLIRVQYSLSEYKYKRRADLQGLSLNFSLTLANRPLPDLLTYLSSPTNREL

DPMTRSQYPLALYLQDMYNFSMKLHQATTFGYLVNGSYNGIIGDIISGFIDMSITPFEFHVPRLKVIDYAVVTWYADTTFVFLHPKSSTLRNNFLKPFTNDLWWMILLVAAIY

WLLLLLSLLLEQHHQAGTRDASLSAIETGLTTLAALSQQGLGDSPNFYSGRITFLSLFFWALLLYQFYSASIVSSLMTPPPRWIKSIKDLSESDIEVGAREHPYFHNYFEKMTD

PDCIELYDRKMKSPTKNRNGFLPVDRGFKKVQEGGYAFITESAVTYQILHDTFSEDEICALQEVRVGRPRWLAPILPKNSPFKKMIIYGLRKMVQSGLLNRLQKIWRASRPQ

CPESYNTKPTPMSMKEFSPALILLCIGVIISVVTLMMEYLYFYLETRLNSIRMIVEGSTEQYDDQNAEVFT

>DallIR64a.6

MGFWAVLLSSVVLSRCVQSERVVEKFIRDYYDAENIHHINAFGCWDDMDASEFSRKLMSLDNAVLYTPISPHVNLHRILKVNYHYIGVVLDYDCPMSDFILDKFSKELVFN

ESYFWLLLTNSSSPPNDVLQKLPLTVESELSVATSSGNSFELWDAYNPSYSHGGVLNVTYKGRWNPEDGLKNELNQYKYERRSNFNLLPLNWSIVLRSHPASDLELYLTTPV

NRHLDTMSRYHYALVLHLRDFFNFTINLQIHESWGYLVNGTFGGLIGALMKGQADASVSSYQYKLERMDVVDYLVETLNVKLRFFFRHPRSNDLQNNFLKPFAIHLWWVII

AVGFFYWGIMVILKKFEIYYERIEENENTVSSTALTTIAAISQQGLSTPPTITSGRLVFFSLFLWTLLLFQFYSASIVGSLLAPPQRWITTLDNLTDSNLECVVEDMPYMVDYFAT

TANPHTKKLFERKIKATKKKPKGSYMPAIEGIQRVREGGFAFHINVAAGYKIIEDTFKENEICELQQIDMVGQCLTSMVTAKHSPFNEMFTWSVRKAVESGLTKRLDRVWNQ

QCPQCPKSYSSKPTPVSMQQFSPAIFLLLIGFGSSFLILLIEYLHYWKCSDYLSNVEDTNSVAGTDGTEEEQSYMVEGFHVADDGQAVIF

>DallIR68a

MTQKSKCIVFMIDPYYRKLIRYNWAQLRVLPYYSIYVKESEEFTPPRRRVEDILSESKNDGCDAYVLLITNGLQVSQLLEYAERNRIINTRGNFLMIHDTLLFDVGMKYIWNR

ITKVMFIHRFTVLTRRSNKTTMKEWFNLETVSYPVRANNFVKTRYVNTWHKGRMLNKDVDNPFTNKTLRLERRSLRVAIFEHIPAVTRYSRQLQKHYRDYSEKASGVEFEI

MRVLSDKMHFKPNFYTPVDIEIEKWGTKDDNGSYNGLLGEAERGNAEFFLGDLHYTLRHFELLELSYPYNTECLTFLTPESLTDNSWKLLISPFRLYAWIAVILILLLGACAFH

FFALFYQNQIMPYVRNTNAEGIQMRGLTLFTDMQNSMLYTYSMLLQVSLPRLPRPWALRVFIGWWLLYAILVTVAYRASMTATLANPVAKITIDTLQQLAKSRISVGGWSEE

QRDLFGASLDPDLIEIATRFELTLKEDDAVARVANGTFGYYDNIQTLQEARAKRQLLEEMRKKKSTREEKVIDDRNLHVMSECVIYMPISIGMDRNSPLKPQVDEIVRRVVE

AGFVEKWLSDVTEWSKITELKDESPAAKATVNLHKLHGALVALGIGYFLGFLALIIEKIQWKYFVMKDPAFDKYQMDVFYSMSRSNFINKGGIASCRKS

>DallIR75u MMREIRAIAIAWILLNLLARGRSDRIDAIIGNFITDVSSSLLVSSSFTGFFCMESDDIVKFSRQISRNYLLHKIASFNDSDLIDISQIATHNHYFVVDLDCPDGADFLIKANTRRLF

IAPAKWLILRDLRNQDELRGLPYLQSMVEMNEDTLISLLSNFDIFPDSEVIVGQRLNETTVQLSSLYRPNSDHSLTIENLGSWDDEGGLCLCSHDQSSRRRVNLQGTVLKTSL

VMTDLNTINHLTDYQDKLIDAVTKASYMWIVYLSERMNATFNFTVERTWGYKNEDGNWNGMIGLLDRGEINIGGTATFMISQRIGVVDYVQLYTPTGSRFLFRRPPLSYVS

NIFTLPFARSVWIAIVAFLTISFGFLYITMKWEWEKMQAIPLESRLGGDLEGKPTVTDNLLVLLGAIFQQGFSCEPRTISTRIVVLMVLLIALSLYAAYTANIVALLQSTADSIKTL

DDLMNSPLKIGIFDIVYNRYYFGAFEDPVRKEFYERLVKDKPAVWMPLEEGIRKVREGLFAFHVDLGFGYQMMQETYAEDEKCGIEEIDYLKVYDPLLVIERQSPFREIIRVG

ALWIAETGLKPRVASKFFTQKPPCIGSTSFVSVGIIDCYVAMLAIVYGCAISVGILLLENLWRRCIGERRSHDNTPLKTSLPESSLTRDEKSATQSSTSLQIEELFG

>DallIR75u.2

MSLIDPFYRYQINENKMFSAPGKWLILQESRSSFPQADHSATPTNETQLRGVFENLNIFPDSEVTIAQRIEDTVVKLVSIYRPNTVANLIFEDRGVWSKGNHIQLHNNEETSRR

RTNIMQTQLRAAAVITNPNTMNHWEDFQERRVDGVSKVDYAFTKVLVARMNATVHFTFTPTWGYKSSNGSWDGMIGSLLRNEIDLGGTGIFITEPRLEVVSYINLYTPTRVR

FIFRRPPLSFVSNLFVLPFARNVWFAIVIFCCLGYMVLYFSLSQEWKMIEKIPYEERLWGDLEIKPAFGDNFLIVIGAITQQGSAYEPRTGPARAVVFMLLVTCLSLYAAYTANIV

ALLQSSSDSIKNIKDLMESPLQLALQDIVYNHYYMGKFDDPLRTEFYERRIKNLKNPYMSTEDGVEKVRTELFAFHTDLVMGYDVVKSTYEEDEKCGFEEIDYLYVSDPTFII

QRQSPYAEIFRVGGLWLGETGLAQRFIDKIYHKKPECNNQKKFISVGTVDCYAAYLVIVYGLVVTFTILLCEVLWFKNFDKRSSEIDDEPENHDVASITSAAASDQTFGEELNS

TILEEIM

>DallIR75u.3

MLIVSVIAVLIFSVGVSGDQEMDKILQSFIVDVITSLYASSSFTVFHCAKPDDITEFSRFMSRHYQLHEVATISEAYKFRFIESPLSHQNFYVVDLGCAGVHELLIQANNTGSFV

GPTKWLILQDLQTDSNATANENFHSGATDQAELRSVFEDFHVFPDSEVIVGQKISDNSIKILSVYRPSPVRSLIIEDRGTWNSIDGIQLRDHDVSSRRRTDLQQTPLKACSVVT

HPDTMNHLEDLKDKQVDVITKVGYAFSKLLAARINATVTFTFAASWGYKEKNGSWSGMIGEIDRNEVDFGATATFIIASRIDAVDFIQLYTPNRIRFVFRRPPLSHVSNLFTLP

FTESVWIGISVLSCIGFVVLYLSMAWEWRIVKDLSHDEKLTGDLEIKPAFGDNFLILIGAVTQQGSAYEPRSVPARIVIFMLLVFCLSLYAAYAANIVALLQSTSDSIKNVEDLM

NSPLKLGIQDIVYNRHYFGSFEDPLRKEFYERRIKKQKDIWLSLTEGIGRMRNELFAFHTELTSGYDVVQSTYEEDEKCGFEEIDYLYVSDPAFAIKRRSPYREIFRVGGIWLQ

ETGIKERYIRIMYNKKPPCNNQKKFVGVGTIECYAAYLTIGYGMLLTFGILLFEIIWSKR

>DallIR76b

TPPYSSTIRKNGSLRGEGYAFEVLDLIAKKLDISYEIVQPRTPGLGNESAGLISLLKSKEIDVAVAFIPMLWKFTEFTRYSPIMDEANIVGMMVRPAESASGSGLLAPFDTTVWI

CILISLLVIGPIIFLFTAFRSYLWNHTKVDKYDFTSCIWFTYGALLKQGSSITPVNNSTRFVFATWWIFITILTSFYTANLTAFLTLSRFTLPYKSVEDIMRKRVPWFFEKDRTIDNI

LDTLQILIEVGIIKYLEKRNLPKVEYCPLNLKSTERQLKNSDLTLTYKVIAAGFISACIMFIYEMIRRRQHVSCLCCGKSCSFCWPGIETPDDPILPPPVVLQSENNYVEKESTIR

HTINHNFNNDSNHNNSNRHPQVEQISLIDESIYGAAASARKTYINGRDYWVITAPKGDKRLIPIRTPSALLFQYTT

>DallIR93a

MALILIVVLIYSCRFVVGFNDFPSLMTANATMVIVIEKTFYERKILIKETSIFTREAYEKSVASFTSAATKIARERMNISGLSIHVAQDMGANLARDYTILLSVATCSSTWELFGR

AKKEKLVHLAITDLDCPRLPKDEGISIPLIEPGEELPQIFYDMRISRGLDWKRAIMLFDESFEQDSIGKVVQAFCNELPKSDLGLASSSLYFLKRGKSEISTKRIIKEILAALPPR

KPIDDHIIVVAAYNVISFILEAARSLRMLSTGSQWLFVVPDMAKYTSGNVTYLIELLGEGENIAFLYNDTNLNIRSDQSCRTGATCHVRELVGALGIALEKSLSMEIELYNRVTEEEFEQAGTTKFDELYNDTKPGGRGGTCGRCIKWTVVSALTWGNRIGSEADIEPHTLLGTGVWTPDPGYESKDYLFPHVMHGFRGKTLPVVTYHNPPWQFQMTKTEEITE

STKAQWDGFVFDVFHELSKSLNFTYKIVAVETPPEINLVKSNPLKAAMSAAEKVPEKVTELVRSKSVFIAACAYTVGVYRKDTTIKFTLPMTIQTYGLLAPRPKPLSRVLLFA

SPYTNESWALLTTAIIIVGPILYLVHTFSPRTIDEAVKNPQEPVYIGLSSPSRCTWYIYGALLQQGGMNLPKTDGARLIVGTWWLVVMVVVATYSGSLVAFLTFPKMEAPIKNV

DDVIERRGEITWSLPQDSFIEDFLTVSNEEGLVDYKRLLRGNEPHAQTHDTVSYEDNIHDVKGGKHVVIDWKSSLMISGRNDYIETGRCAFSLGTDVLFLEEPISMVVPTDSP

YLGLINVQLQRMHESGLMDKWIANRFPTQDSCSDSLMGGFEAANHKVDLEDMQGIFFILILGYIMGTVILGYEFFRQHRQLAKERKVIQPFVQ

>DallIR101

MKFSIPLIFFITFILAFFKLNGAHYHGPLLKAVHSKYKTNGGIIVSGTGHMSFGRTTIWHEAVRMLSNDGIFTVIVNLRQFGDKLKSYSGGRMSLLIVIAIDTVEELHSFESMSK

DFHLSYAVWLILFSRDASQDVCDFCRNPHDSLSNLGFGSKVLVSCCDSDMIEEWWSIGENRIERQELGRLMDDNQGILWLSEELVNRRRYSLNGQELRIVTVQDSFSFQEKN

GTYYGFLGEILKELREAMNFTVSIIYEEGYGALNLKTGNYTGYIGRIHRREADLGVAQYFIRKELLHVLSYTSPVLSGYFEFHFRKPDAVNVPWNVYLKVFTGHVWMAILS

LILTSTLLLTLITYRRRSHFVPLLFENHLIVWDIYCQQALPAFPDKTPLRIVYISLALSALVTLSAYSASIISQLAVFSYSPFRTPEEFVEDGSYKIIRLRNTPSHSTVMDYELSDEK

LMKKFESLLQLRDLNPRNPQEAFEQICRERVAFLAFETAKTAVNNEIPCEITSFKFGPVYHVAMLMPLGSSYMDLINHHIQQFKDNGILRRLKRKYSTVPRGNKSALAPVEIH

EIAPILFMLAFAFLIAFIIFISEMNYDPFTKELHKPRRRKTRKRRAKAGHFHLRHRI

>DallIR102

MKFANSSIFSIVSIVIFFELSEAHYYGPVIKDVHDQFGRTEVIIVPQTNYFSFENIMIWHETTRILSNEGISTVILNTRHFEEKLKTYNKETTRSLIVIALDTIEELHAFESTTQDLH

MSYAIWLIFFTRDADRDVCEFCRNPQESLSNMKLGSRILISCCAFNTIEEWRYAGKNRTERQELGRLNRDDRGIVWFSNKQVADIHGGRYSLAGRGLRIVAVKHCPIFWEKD

GHYYGVLGEILRELSQAINFTVSKIIWEDDYGAWNPETSSWTGAIGRIHRQEADLGVSDFMFSTHRSTAVAFTSHFTSAGFYLYLNKRYMARLHWNAYFKPLSMDVWMVIF

GLILTTSILLNLINYTRRSHFFPLLFQHCLYAWGIYCYQALPKFPKGTSSRIVYASILLSSVVTLIAYAAAMTSRLTVVSYIPFKTLQEFVDDGSFHVIKLNVSQDFDHYKFFDQT

LTKKMMSLMMPRNLLPVTDEEAFEQVCSKRVGYYLNDMAKKAIEAQGIRIPCELSSIKYGKTQILAMIMPHGSRCLDLVNYYIMQFRSNGMLQRLEHKYYKELKRNDLKY

SSVSLRGVAPLLLILAIGFLIALIIFIIEQNANAFRKKLRSYQKRRTTFLKTRKASLFLANDCNFKKRLRNLKQFIGRMQLK

>DallIR103F

MYLHSVIMVKLNEAHFYGPAIKAVHDKFEANGVAITAGINHLFWHETSRFLSNEGISTLIVSFQQLRNIWKTQPTRTTRSLIVIAFETFEELHTFELIIKKFRMNYGVWLIFFMR

DADREVCHICCNPHGTLANLKFGTKILISCCDSNMIEEWWSIEENLPKGQEIRRLMDENFTISWFSDELINGDKYSLKGASLRITAVTQSVFFRKKDGQLYGFLAEFLNKLSQ

AMDFKVSEIIWEEDFGVCITGSSDCTGSIGRVQREEVDLGVAAFSATVERHNLVDFTFPIITGNHEIYFRTYNAINVRWNAYFKPFAADVWIFIICLILMTAMFFTLIRYKRESSF

FPLFVDRYLHIWGILCHQSLPAFPRETPLRIVYLTMALSALVFSSTYAASVTSNFTLSFYSPFNTVEEFVKDGTYELSFSDNKLKKKMLSLLRSEDSLPNSSQEAFEEVCKKRV

AFFTHEATKRALFNLIPCEISSIRINTMNPMSMIAPRGSKYTKIINHHIHQFKEVGLLRRLENKYIKMENDKTEHPPISLQEVQSILMILVTGCLLASIIFIIELKLYTYCKNL

>DallIR104PSE

MKFFLLLILLGSSSLVFVNLNEALHHRPLIKDFYDKYKSDXVWIILGSNNLFEKTTIWHGVIKMLSKEGISTRTADFNAFKFMLKTVNENNMRPLIVLVMNEIEELCSFESIIG

KFYTDYATWLILFTADSSQDVCGFCRKPYGSLANPIFGSKLFTLCCNSKVIMKWRYSETNRSRRLEIGRLMDGNQGIVWSSDELDYNSKYSMDGRTLRVFRVRVRTXMISTL

TVSSGSTFNTMDEFVKDGSHKLIVLDSTLVTDMYKVITDSSLYYGNPSRLLNEGHKGQNKCQVGQNEGHEISPLLNRIPCEIVSVQTGVIGTAGMIMPLGSKYRTALNHLQQLKXGLLRRLEHKYLRQFERGKSGHPPVTVERVVPILFILAVGFLIAVIIFTVERNVYLFATILRDRKRRRALSGKCKTFSFPT

>DallIR105

MKFAISTIFLSVSIVIFCELSEAYYYAPVIKDVHNQFGRTEVIIVVPQTNHFSFENIMIWHETTRTLSNEGISVVILNTRPDEKLKIYSEKTTRSLIVIALDTIEELHAFESITKDLH

MSYAIWLIFFTKGDDRDVCEFCRNPHKSLSDMKLGSRVLISCCTSNTIEEWRYDGKNHTERQELGRFKKDDRGIVWFSNEQVADIHGGIYSLAGRGLRIVVVKRARMFWEK

DGYYYGVLGEILRELSQAMNFTVSEIIWEDDYGVWNPETSSWTGAVGMIHRREADLGVSDFLFSIKRTTAIAFTTHFTSADLYLYLNKDYTARLHWNAYFKLLSMDVWMV

IFGLILITTILLTLINYTRRSHFFPLLFQHYLYAWSIYCYQALPKFPEGTPSRIVYGSILLSSMAIISAYGAVMTSRLTVVSYIPFKTLQEFVDDGSFHVIKLNVSQNFDQYEFFDQT

LAKKMMSLMMPTNTLPLNDQEVFEQVCSKRVGYYLNDMARKAIEAQGIRIPCELSSIKYGKTQILAMIMPQGSRYLDLVNYYILQFRTNGMMERLEHKYYKEFKRNDFKY

SSVSLPGVAPLLLILAIGFLIALIIFIIEQNANAFRKKLLSHQKRRTTFLKTRKASLFLANNCNFKKRTRNLKQFIGRMQLK

>DallIR106

MQFFIFLILLCTSSVIIVKLNEAHFYGPAIKAVHDKFEANGVAITAGINHLSFEQLTVWHETSRFLSNEGISTLIVSFQQLRDIWKTQPTYTTSSLIVIAFETFEELHTFELIIKTFH

MNYAVWLIFFMRDADREVCHFCRNPHGTIANLKFGTRILISCCDSNMIEEWWSIGENLPKRQEIGRLMDENFTISWFSDELMNGDKYSLKGASLRITAVTQSVFFRKKDGQI

YGFLAEYLKELSRAMDFKVSEIIWEEDFGVCITGSSDCTGSIGRVQREEVDLGVAAFSATVERHNLVDFTLPIITGNYEIYFSKYDVINVRWNAYFKPFAADVWIVIICSILMTA

IFFTLIRYKRESPFFPLFADHYLHMWGILCHQSVPAFPREAPLRIVYLTMALSALVISSTYAASLTSTLTLSLYSPFNTVEEFVEDGTYELIVLDSALINDMYKFSDKKLKKKML

SLLRSEDSLPKSPQEAFEEVCRTRVAFFTHEATKKALFDLIPCEISFIRINITNPMSMITPRGSKYTEIINHHICQFKEVGLLRRLENKYFIKMENDQTVHAPISLQAVKSIFMILVT

GCLLASIIFIIELKLYTYCKNLCDQRRRKTLLGKRGKFPFSMYNFVIRKFP

>DallIR107

MLLGTSSLIFVNLNGALQRGSLIKHVCDRYNSDKVLIILGSNNLLFEKSTIWYGVINTLSNDGISTSIVDFNALNLSLKTVNAKNMHVLIVLVLDTIEELKNFESIAEGLYTSYA

IWLILFTSDSSQDLCEFCRKPHGNLSNPKFGQKVLTLCCHSNVIMEWRYSETNRIRRLEVGRLMDGKPGIVWSSDELDHNRKYSMDGKTFRVIGVKTSIMLWEEDGVFSGIL

GELLTELSQAMNFTLSKIIWEHDYGIWNPKTSNWTGAIGRIHRREADIGVSDFFMTTQRYAAVSFTSPIFFTPLKLHFKKRHADNLTWNAYFKALTIDVWVVILGLILITPLLL

TLIRYRRRDNFFAFLFEHYSYVWGIYCQQGVPVCPQGISPRIIYLSILMSAMVTLGAYSGSMISTLTVSSDSTFNTMDEFVEGGSHKLIVLDRTLVTDLYKFTDERMRMKMMS

LLKPEHSLPQSIHEAFYQVCREKVAFFTVEATKTALLNRIPCEISSVQTGVIGTAGMIMPLGSKYRTALNHHLQQLKRIGLLQRLEHKYLRQFERGKSGHPPVTVERVVPILFV

LAIGFLIAVIIFTVERNVHLSATISRDRKRRRVLSGKCKTFSFPT

>DallIR108

MKFFILLILLGSSSLIFVNLKEALHHGPLIKDFYDKYKSDGVWIILGSNNLLFEKTTIWHGVIKMLSKEGISTRIADFDAFKFMLKTVNENNMRPLIVLVMNAIEELWTFESIV

KKFYADYTTWLILFTGDSSQDVCGFCRKPYGSLANPKFSSKVFTLCCDSEVIMEWRYSETNRSRRLEVGRLVDGNQGIVWSSDELDYNSKYSMDGRTLRVVGVRMSMLLR

EKNGKLSGILGELLIELSKAMNFTISKIMWEDEFGVWDAEKSNWTGAIARIHHREVDIGVSNFIMTLQRYDAVSFTTPILFGPLKFHFKKRDINYLTWNAYFKALAIDVWMA

TIGLILITPILLTLIRYRRRDHFFPLLLEHYSYIWGIYCQQSLPDCPKGTSLRIIYLSILISAMVTFGGYSGSMISSLTEYSGSPFNTMEDFIKDGSYKIIFLDPTLINDIYTFRDVSLR

KKMMSLLKPSHSLPKNIEEAFHQVCNERVAFFLADVMKKDVVNDIPCEIYSVGTGSIGTIAMIVPLGSRYLDPVNYHLQRFKRNGLLERLKHKYFKLSQRRRSNHPLVTVEA

IVPILLILAVGLLITIVIFIAERHAAHVLVTKLRDRRELKVSLRKRKSFSFPMYDYVP

>DallIR109

MKNSVMLLLCFTGIRPIISTHTCNDVNCYGSLIAQVYNEYNTAGILVASTTTHLLFQTLIYWHEISTTLSDQGIPTVMVNFAEFTERMEFYRRHPNRPFVVIILHRPGDLYFFSQ

ITKSLPMNYVLWLILFIGDADKDACNFCRDPHENLLNLKFNSEVLIMCCNSNIIEDWWSVTRNGTNKGQLGRWIEERNEIEWFAHKSIHRRRTSLEGRAFRISFVQDSSYIWI

KDGHLQGFLADVLRELAKSMNFTISTATVEDTYGILDPGTSIWRGVVGQLQRQATDIGVDGFSRTSARRSVIDFTVPIITVDSRLYIKKPDGTNVQWNAYFQAFTRTLWAVIIA

VILIMPVFLTLIKYNRRFNFFPLIVEHYLHVWGIYCQQGLPEFPDGMPLRILYVSIFISALVVSSAYSASLTSFLAVSQLPFNTMEQFIKDGTYGLTAVYGSEDYNTFKFSNDTVL

RQMMSFMKPKGSLPKSYFEGFSQACKERVAFYTHYEITKGREMYVMPCEMVSFKTGSNQLSGIILPLQSEYRTFINHHLQRFKTNGVIRRIAQKYNRNDEPPKTVHTPVHLR

GIVPILGILIFGFIIASIIFLVERSFYSFRNKLRRRQMRKI

>DallIR110

MLSLTSLILWTTCMASPIVFSHEVTHYGSLIKNIYDKYGRTGVIIASATSHLSFEKTSTWHELTGMLSNEGISALIIDFRQFENRLKVYIEKTYPPLIVIDLDTVEALHSFEIITKN

ADMSYSVWLIFFSGDVDHDVCKYCREPHGNLFNLNFGSKALISCCASKMIEEWWSTQKNHTKRQNVARLTNENPGIVWFSQKLISDGRQSMDGQILRVTALADLQIKNKR

NKDLYGDAGKFLAALSTVMNFTVPNIIWEKTYGAWNRETSKWTGILGRIHRQEADLSINSIVMTSERSNIIRFTTPIMSGVYQLHFRKLDSARFTWDAYFKVFAADVWIVIIG

LILTAPIVLTLIEWNARKSHFLPLLAKHYSFVWGIYCQQGLSDFPDETPLRIIYISLMMSALVVSATYGASFMSILAVSSSFSPFSSMEEFAGDGRYKFIVPRNSSSYYEFKNSNL

TLMKKMMSLMKPVNSLPQTFVEGFQQVCKDRVALYTHEFRKRLLSNLIPCEITSINTGKMETVAMIVPRNSPYIEPINHFIQELTFEGIFRKLVKNSNPQHYEYGFQPAHLQGI

TPLIVVWISGVLIASFIFIFERTSYLSTQESHIRNRRGTKNNAKHPH

>DallIR111

MNFPTLVLLLSTLNAISTIVSDKFSDFNYYGDLIKNVHDKYKGTGVIIASEMDRQPFERITIRHETTRKLSNEGVSTLFLDFSQFENRLNVYMKETDPPLIVIVLDTIGALRSFE

TIAKGLDMGYFVWLIFFSRDAGQDVCDVCCHPRGNLFNLKFNSKVIVLCCDSKIIREWWCVRDNRTWSQEIGHTNNQEITWVSDELLRDRRKSMHGLVLRVAAVKGTALF

LERDGKYYGYIGEILAALSEAMNFTVSQIIWDNDYGYWNRKTLNWTGVIGRIHREEADIGVPDFLITDARYNAVNFAYPIMNGAYQVHVKKLEVAQVAWNAYFKVLTVDV

WMVIIGFILITPILVTLIEYRKRECPLFPLLLEHYMFVWSIFCQEGFTFQIEMSGETSSKIIYVSLSLSTLVIYTAYGALMTSILAVSSSFVPFATMEEFADDGTYKFIVLNNTLFYN

TFKFSNNTLMKKMMALMEPTHFLPQTHEEGFKQVCSGRVGFWASEKIKKIYDNLIPCEITSVGTEMKESSTLITPRHSEFMSLINYNIQQFKYNGMFQRLEKKYWKQSQQN

EKSLSPVHLQEISPFVFALFIGGLIAFVILVIERNSYLSVKKVHNRKSKQVRKNRTSKFPAYSRL

>DallIR112

MKCWIVLILCFTATQPFPLTNEKGKINYYGSLIDIFYHRYKPSGVIILSPEKDYSFESLTFWHAISNEMSKRGITTAIIDSQSFRDRFTFYTAQSVRPLVVILLGSMEDIYTFGKIT

MNLYMSDIAWLVLFSGDSDENACSFCHNPFGNLLNLKFNSEVAIACCDSTIIKEWWSIGNNHTRVGQLGRWIDQNRGIQWFSSEALLQRRRSLEGRAFRVCIVKGSNDAWE

KDGHFHGPLGKLLEALSEFLNFTISTVIIEDNQGYWDSDISRWTGVIGRLVRGEADIGLAPFMMTAERLKVIDFTVPIYDGFSQLYIKKPDTIVLHWNAYFQVPTISRYFSPTVI

CLLSQLIIYLQAFHVNIWVVIIGSILIMPLFLTLIIYRKPLFFVPLIFENYLSVWGIYCQQGLPVFPAETPSKILCISIFLSALIVSATYSASLTSFLAVSSSYLPFHTMEEFVEVGTYK

LTSIKDSSEYLMFKSSNDTVMQKMWSLMKPKESLPANEEQGFYQVCNEKVAFHLTTGYRKEYLNTATTCKITAIETTRIQGSPLVMPFRSEFTAFFNYYIQRYKHSGLVSRWI

EHYHVEQELPRAIYPSVRLEGVIPLLAALAGGFIIALIIFLTERILHRRRDKLRHKKIGKLQLITFQRKQFPRATFHKNLGFRY

>DallIR113

MKLFISLELYLTGIYVFFVAGNDTVVYYTSLFESVHDTYGTAGIIIASSTNYQSPARLTTWHETCTILSDKGIPTAFVSFANFKVRLKFYTRRTVRPLAVVLMRKIEDVHIFEGIAKKLDMSYPVWLLIFTKDADESVCEFCRHPHRNLFNLRFNSEILISCCDSNVIREWWSKARNFTHATKIGEWIGEDRGIRWATNQSLYSRRHFFVQPTVRVSIVRGSSYIWEKN

GELDGYLGEILKELSLTMNFTISALIKEPYYGSYDPKTSKWTGVIGRIVQHEADMGASEFTLSHERINVVDFTIPIAIGDCRLYVKKLDGARLQWNAYFGAFKADVWALIIGSI

IVTPIVLTVIKYTKKRRHAFSMAIEHYLYVWGIYCQQGLSEFPDETALRILYVSIFISALVVSAAYSASLTSFLTVASIYLPFNSMEEFANDGRYKLIVLQDSADYDMFKMSNETI

MKKMMSLMKPSHSLPQTILGGLQQVCTRKVAFYTNEALKRTLNKNLPCDIVSIKTGKIETLGMIMSRHSEYMGIVNYHIQRFKDNGMLMRLQHKYIQQEDTSEGALLPVG

LGGIAPILFVLIIGFFVAFCIFLVEIIFPPISDKLFKRKKRRLNGQNFQY

>DallIR114

MKVCMTLMLFFGAASLMDSSNGLDTIDYGSLIKNIYDTYGTAGIIIASSVNYQSFSRLTVWQRVTRMLSEKKIATGLVNFEQFKDRLEFYTSRTVRPLVVILFGKMEAINRFS

RLAVAIDMSYPVWVFLFTAETNSDVCKFCHAPHQNLLNLRFNSEALILCCNSLIIDEWWSKTENHTNTRELGKWNDERNEIEWFTENALYSRRSSVEGRKFRVAIVKGSGYI

WQKNAEVFGFLGGLLKELSRSMNFTISSIITTIGYGSWNPETSKWSGVIGSLRRNEADMAISEFSMTHKRLDMVDFTIPIAVGYARIYIQKPNGAHVKWNAYFKAFATDVWV

VIIGLLVTMPLFLTLIKYKRRKFSLFPLVVEHYSYVWGIYCQQALAEFPAETPLRIVYLSIFISSLVVSAAYAASLISFLAVSSSYLPFNTVEQFAADGTYKLVVLKDSSDYDTLR

TSNETIANKLMSLMKPYYQLPQTLEEGFQQVCNGRVAFITNEAMKDAVLAPMPCEIASIKTGRIETLGMIMPLRSEYTALVNFHIQRFKDNGILERLKQEYFRQEDSPELSHP

PVDQWEIAPILCVLTGGFFIALVIFLMEHIFHYLRNKFRNYKIKKFSCRKDRHVHFAREAVIP

>DallIR115

MELPVAVILSFITAYWSTLTTGHVHITYYGSLIDEFYKIHDADGILIVSSTNYHSFGSLTFWHEMSRKMSNRGRAADMVNFQELTPTLQLYRRQNVRPLFVIFIKNMKEVHFFG

RITKTLNRSNSLWVILFSGDSSGDACEFCRHPEGNLFNLKFNSKVIVACCESTIIQEWWTSTGNRTHIGELGRWIDESRGIEWFSDKSLYERRTSLEGRPFHINIVQGSTDIWQK

NGDLHGYLGRVVKALSQFMNFTISSVTIERSYGRWDPDASEWTGVLGKLHRNEVDMGVSSFIMTNERREVVDFTIPTVYENSRLYIRMPGANTVQWNAYFEAFGMDVWL

VIIALIMTTPLLLTFIKYKGRSFIFPLVFEHYSSVWGIYCQQGLPEFPDETPLRIVFISLSLSALVITMAYSASLTSFLAVNVSHMPFTSIEEFVKLGTYKLIAIQDTADYTLFKDSD

EVLMKKMAALMEPPGFLPATHHEGFQQVCRKSVAFHTTHEIREGYTSPFIPCKLAWIKTRKIQASGIIMPLNSEYTAFVNYHLQRFKYSGLLDRWKREYHYRIKDVPEIYHPS

VQLKGITPILGVLTAGLLIALIILLIERIFHRHRDQLQRKKIRTSEVEMLQRMLSRPQSSPSWSRDSNDFRTIYRNRQKKLAQAWIINFE

>DallIR116

MNLFVFLLYISIVMSTVNFLKAKKRVTYYGSLIKDIYEEYRTGGIIIAMPDNTRTRFARLTRAYEISRSLSRDEIPSIAVKFETFKERLASYTDRIFRPLVVIGFYKMVEVYTFQQI

AKDLIMGYPVWLIIFAENADADVCEYCRNPHGNLFNLKFDSEVLVLCCDSGIINEWWSTTVNRTERKEIGRWIGEDPGRYWFNHGSIYGRRKSLEGRELRVTAAKGSAYIW

KENGKYTGFFGEILNELSTTMNFTISEVTPTDGFGSLNPETSEWSGVIGRIHRNEADIGVSPMAMTHSRLNAVDFTIPMFSGKSRLYVRKLDGARVQWQAYFKAFAVDVWM

VVIGLILIMPLFLTLIRYRRGNHLLSQVMEHYSNVWGIYCQQGLSRFPDEISLRIVYLSIFISAVVSASVYSASLVSFLTVFSSYSPFNTMEEFASDGTYGLVVLKNSAQYDMYK

NSKDAFRKRMMSLMAPEESLPSSLAEGFRRVCQERVAFETNEAIRKTMAHSIFCEITAIDTKTIETFGMITPRRSEYLEFINYRIRQFELNGVFRRLKNKYFTKPRENKIDYPKV

HVEGVKPILLTLASGFLITLIIFIIELLFSWIQNKLQRREKQRVIQQQTKYFRFSHRAKSEIYFIL

>DallIR117

MILFKTFISAALVVFIKANEEVYDHTPYLITDIYETRETCGIILAAENYHSFKTLIIWHGLSRTLSDEGIPTLMINFKQFEERFEFYTKRTVRPLVVIFLAAMDEVYSFSKIAKNL

DMSCAVWIFLFNGNISSDICEFCHSPRRNVFNLRYGTEVVVSCCNSTMIEEWWSVMEGHTASLELGRWTDGNHGIQWFYNDSVYNRRHSMEGQEFRIAAQSVYFWETNGKYYGYLGEFLGELSQSLNFTPKVIWEESYGTWNPETSRWTGVVGTLERNEADLVLSELRMTNERLYVMDYTIPIGVGGTRLYSRKLDAARLHWNAYFQAFTVEVWMVIV

GLILTIPILLTLITYKKKDCYLLPLVFERYLCVWGIYCQQGLPEFPKEASLRIVYLSIFISALVSSGAYSAALISFLAVSSTYSPFNTIEEFVEDGSYQLIVLKDSPDYDMFKNSNQ

TLMKKMMSLMKPIDLLPQSFQEAFNQACTQQVVFYTHEAIRRAMANRLPCELTSVYTGKTANLALALPRNSQHRHLVNFQIRRFGDNGILQRLGNKYFSEYHRNEICYPSV

HFQGIIPLLTMLAAGFLIACIIFIIERICSPPKKELFDLNRRRRC

>DallIR118

MINNNGKNNNSLSYKKGINFSISLILLETFFSAASVLLVKATEESDYHTPLIRDIYDQRGTCGIVLASAENYQSFGTLTIWHGIFKTLSDEGIPTLMISFEQFEDRFEFYAGLTVR

PLAVIIFVTIGDVQSFSEISRDLDMSYAVWLLLFMGDASPDVCEFCHSPSGNLLNLKYDSEVVVSCCKSNIIQEWWSTLTEHTNSLELGRWTAENRGIEWFFNDSLYSRRHSM

EGQEFRIAATSVYFWERNSKYYGFLGEILRELSDSLNFTIPQVNWGTSYGAWNPETSSWTGIIGKLENNEADLAVSEFRITQERLNVVDYTVPIGVGGTRLYLRKLDAARLQ

WNAYFKAFSMDVWMVIIGLILTIPIFLTLMRYKRKHYYLLPLALEHYLSIWGIYCQQGLSEFPKPTSLRIVYLSIFISALVSSGAYSASLISFLAVSSSYSPFSTIEEFVEDGSYQLI

VLKNSPDYYMYKTSNQTLMKKMMSLMKPTNLLPDSYQEGFEQVCTKRVVFYTHEAIRRAMVNLIPCEITAINTGKTETLGMALPRGSEWRGLINYQIRRFGDNGMLQRL

GYKYFTEYNRNELRYPSVHLQGIIPIVAMLGAGFLIASIIFIIETIFCSSKKKSLNPRRRKSF

>DallIR119

MRKLIILLCISAHTGQSYCQLIRPNVIYESVIKGVHDYYNNTCIILLHATEDPIESQEESENLQRLQAYLSKAYIRTAVMQISTFIDRVGGSYYHIKRPLFVLLNDDDDVRNQFAF

EIAPWIDMSYPNWLVFLRPETSIEGFFDKIYVQFDCTMMVSQPDGNLESPGEIITEVYQIDRGEKLRTGLFATWSRETGIKLPRWSLYQRRSDLQGHLFRVMSIEDPPQSMIRR

DDNGQVTGLGGFFGGLMDLLQESMNCTLVYLETNEWGYLRGNGTWTGAVGSLIDNTSDIVAAELIMTRDRVDAIKFTTPVYSTKIRTYIKRPSLSALKWGAYFIPFEPSVW

VAIVVMIVITTATISLVNSAISLFARQWKDNDDCPTNVPDIFFAVFGVFCSQGMSASILDPIRISHFVIHLTGVIILAAYSAALISALAVKTFVLPFTTMDGLLKDNTYRFGVVRD

SADYSFFQNTTDEILGVLFDKLLVKEKELPNNYLEGLSLVCNEDKYAFMTVDNAVTQLQSEVGCVLVPLDTISQTSIAFGLRPGSPYRGILDSHLLLLRDSGVMQRLLNSHW

AMTGDNVEGGWESVEIGDILPLAVMLLTGIFMGFMILSIEKLVKRNAKIIKKEKKIVKKFLKNAKFLSGQLNHVKKSNK

>DallIR120

MKLLPGFSVFSLLRVVGSIASGESILVWDSENADFIPIWHFSLFRDLIMKNRNNSLGVEKARLQGQTLRIGYHSEVNLMTFENNGTKISGLLGDLWTMLSDLLNFTIEAVEVP

EAKFGAQSSESHIGLMGLLRRNEVDIIPRVAFYRNTNEVMDYSTPLWTNSFRVFVRPQFDSDDSWIFKTFPWPCWISIITSIALFSFFGTLFDRLTAARFQRNSLRHLLLEHFFY

TFGTFCNQGDIPANMERSRLMAFSRRTCAWLIISIFSTSLVASMTHKEMHLPFTGIASLLAKSDFKLVVNNASLGFSKFHDLILPNFTSPKYSRRFEFTRIAEDMYRKGCGSSG

KKAIFESEDRYRAWATRTCTFIPTQETYFSTWITTGMTKGFEYKRPIDNGILKIIEVGLLTALKDRWLIPPLTWPPDKYVVVGMKKVYIIFVVLSIGVMVSLMIFTMEHIVVIHR

RYYLRRKWDKQLRKRARRLKVAWSRRNPFEEKGILEDRNAFLL

>DallIR121

MAIKTREFTIIFLFFVILNGNQGQMHPPPSPLTLQLMMEYAKFRFWEQIVLFDDLSNGNNEILYYARPLISCLSDQGMSISIQSTLTNKLPEALNIRRHRVGAIVLLDRLNHTSA

ENVLKTASSKRLFDYYISWLLITTDSNDASIDLILRNLTIGINSDVVVATSSASAYNVRKEIFNYKNRQFREYIKTYNFKWENSNEVIPENVTRNLEYSLMENRSISFYLVHTYK

IRINDNSSLVVDPLGYWNPGAPMLKLPINVALRNNFFRLPMIVGILNGTSDNQNGEITSYEEEPSEDQPMNDFIDFLAHSLNASLEIVPHEKLGTLTNKVWSNLLGDVYTGAV

DIGLGYITTNEDRRRDMSFTHPLIRYTRNIYIRPPESGTMRDIFLQPFNNHLLLCVALMQFFIIVTIGSINYAANNVLSKRKGRQTGIGEATLWCTSIMCMQGSPWNPSTLSGKT

ALLASLIFALVTYNAYAGFITSILSVQATGIKTLDDLLHNNFKLGYSDVDDEYMRNANDSALRQLYIKAFNGRESRLSTSKGLQRAVGGRYGFFASATLARRALRTSLIHERCLLKEIEIEHTFTTVALPMAQYSPYEKIINLSILKMDERGVIDKIRQRMLPDMPRCQDATTFHSARIADVYSAFIILAIGIITSLFLGVIERLWNQRKMFLAKIIGRVTSRKSVEAPK

NHSVNHNFHGASVTWWRHSVGKNSRLHQGKRFHRAFKLGTFPFHH

>DallIR122

MCKYFIILLHVISSFTSGERGDIILDIDRGLWLNDRDFEMMIKYSYHFSTCCNIFVNGTTRDIGTLFNLFIKIYQYEYTTGSIEYGCRGFFLLGSTGETLALAVGRVPTAVSTTEIL

IVVDADLRDDSPLLNVSLFQHSNVNIIARSGNWTLSENFLQPRMFKKVHRSSQMRHKTGIVDLEGRRLQVTTSNIAPFSYLSTTVNRTVNGIQGQFFVANDERELDGVEVKL

FLIMAEKLNFTWMMRKPNGPYRHGRPNGTSWNGGMIGQLYRKEVDLAFGEVWLEYEKSQYVNLSVPWYEVWINFLVPRPKPTENVWALAKPFRLNVWVAVIAIVILESI

AVWGKARINSKLPPRFRSYVNTLIEVIGRLVGTWAPRKTQGIRIQLQFWHFAGLLVVTAYSSSLAARLTTPDYEPRIDTIAQFVKANLTWGRERTPPNYRHYFDLNDPYAKQL

SNGFLIETSQEDRQSKILEGNYAIIGKISHSIFFPEVNVCNSDLANYRVMRESTAKFFISFGAQSWLVPSIDTMMRRLTETGLVEYHLRDVIRRRVNGSLRDVFIEHDGENTNGP

RALKLKPLGAAFIILLAGYVVATIILYFELKNKNKIDH

>DallIR123

MWKCVVLLGLTGNFVGGDRNVMIDFQRASWLDDQDFKGMIDYSFGGSRCCNIFVEGVTDGVNALFHQFIKLYGHDYTVNKINRKCNAYFLLAEESTSLISAVEKVPTTIAL

TEILIIFNAEIEKNSLLFNASIYENANVNLVSRTGRWSLSEMFLLPRVFKKVSSNSDMKHNKGIVDLEGRELQVATFYVPPLSYLSTSENRTVNGIEGEFFSSNDTMEWDGVEV

KLFMIIAKQLNFTWMIRKPNGGYRYGRAMNSTWHGGMIGQLFRKEVDLAFGGIWFMYDPFRYVNLSVPWYQVSIHFLVPRPHPIINFWALTRPITLEVWIAVAVTIAMQSLN

VWFKAWINPKVPSRFKSFSNTLTELIGRLVGSWAPRKTVGLRVQLQLWHFAGLLIVTAYSSSLAARLTTPDYEQRIDTADQFLKANLTWGREGPIPKFDDYFEEQYREKMRE

RFQSENSPDERQSKIEQGNYAIVGKIIRSIFFPENDIHSSDLHNYRVMKEGFGKYYVCFATQPWLVLSIDR

>DallIr124

MKTPLLRGALKFLVIMMCTGPFEAFHIPEPAWSADLMSYIKENYEHYRQVMIITCKDSGVPFENYWIRKILHTAMATFPTIRINVDFSSNINEEWSFHRTDATATLFIFVDDSD

TWRHHQPKDVGKVVPQQIISIMKDLSLNKKIAKYLALFLSSEQTLNFDDLLRHAWEMQMIDLTIIEVIGCQSVKTTILNDCVDDSSLPVIHHFNPFLDSIIRKTYEPGMKLFPD

IMKNMHGYPLKIGIRHHPPFSSVSWDNNSNYESMSGLDIQLIHTMAESMNFTLQILPQLMTFEEMQDNSSNGLFNFLRSDKIDIFASPHPHYTEDMEEHSFRSEAFIRDQLCA

MVPLRKTVRILLPKTVTETLILTIGIVLIFWASIWLFRFSQSWSIFTIVRVLFGIPVFAHHARLKPAQRVIIQILMIISLLYSAKIYASLTNINIDVVGAVEIETLDDLDQSGLIPKIHP

HLMDKTFGHVNKNDQTLMNLKRKTVSMRSMMKCLSEAEKFKNTTCLMTTVEGYWFIRSTYRHREPALKMTQACFWSDSYAFLFREGSPYRNKIDNTFRLLAEGGIPIIWA

RNDTSGNFEEQRKDNNVFHELQVPPPGVLRDQLTVVLLFGLTIAIITFIGELLWYHRIKRWKSV

>DallIr125

MKTPWQCGSIEHVVIVMCIGKLGAFNPLEPVWLKDLLHYIEHNDDEYHQVIFIASEHTGTSFENYWIQRIQQTIMATYPTIRLNVERPSDADEWSYHGIDATSTLLISVDDAE

VPRLDISKQTISVMKKLSLNKKRAKYLIIFLSSERTQNFSILLRYGWKIQMMDLVILEIVSSRREMITISESSIDDHSSLVIHYFNPFLNLMVRKPYEPGIEWFPNLMSNMHGYP

LKIGIRHQPPFSEVTWDEKANCVSMSGWDITVIQEVAAKMNFTLQILPQLTNFSEIIEDNSSYGLFNLLSSGKVDILASVNPHYTEDMEENLYRSEMIFRDQLCAVIPVKNTTR

ILFPTEIIEAFISTIGILSIFWVSTLLFKFRRSWSVFDIFRMLFGIPKHINHSSLKLAQRLMIKIILIVSLFYCVRIYACLTEIIIDVDHEVEIENFDDLDRSGLIPVVSAYLLNRTFGNV

DENDRALINLKNKAVATTAIWDCPSHADRFKNVTCLMTRNAVQILMKSTYQPGERILKISKACFWSDSYSFLVRSGSPIRKRMDYIINLLSEVGLKIMWFRNDTRIKLWEIDR

EDELIWDEMKYHPTSPLREQLTIVALFGFTTATITFIGELLWYHWLKKWKKTIKLFR

>DallIr126

MELYHFIVVLIITRALTCSGEFNWIEGIEDYASKHENLHQVIFVSESEETLRIPGMSELFRRIAEHRPIIQISANNSDMFNKMRQDTASTLFIYTHTPFGRGILPSTKIIDAMMEAS

FGRTAVRYLIIHYSNSKNDYLSETLKHAWRRQILHCTIIELLYNHKKMMQEEIFQVLVHLYKPFLNQFITANFSSQTELFPNTPNDMNGYPFKIRITHDPPFSTIRRQLDGTTKL

KGANMRLIDTLAKAMNFTVKAEEARVSKNDRLDTFLQPLMNREMDIYAHLYAHPSEHAELRSLRTEPIDVEHLCAIVPYVAKKNSQLPSMGTICGYLLVLLIVVLFWILEHF

THLNSHYWSPWIVIKLLFGVVVVKRPNRCADRIMFGVLCLVSIVYLTKLYSSLTGGIVYTNEVNKWLTLEDLVNSDLIPFISPLYYNKTFSYATGVELKLKEKVKMISSNMMN

CLNHLAEHKNISCIMSKNEYKVFQQYETTRRTELLVPCLIVDSSAFSLSKNSPYHEHIDHLIRIFRDVGLKNKWYDIGFSRRQNITQEESYDARDVLLEKNDFFQQCIIILTIGY

TLATIALLGELIYYHKCEKKHSSVSAFWRKLKLILIVFCFYDCRNGNGDHRLICFLRGEPLHYEGCRIKFC

>DallIr127

MFNRKISLVIFVITILSDDLQGRPEGDWFESVKTRLSNPHQVYSAMIIRDNNTDDFDVLRDELFGKIIESMPSEIFSNLDGVHNSNNWYRNVSSRMASSLLFVYYHRYSGDNT

RVHEVINTMRGLSKLSAKCYFLIVLRTSSVSKEGVEDMLRHSWNNTMLNILICEIRRDENSSVTNWKVPNDESNRVIIHLYNPFLDKFYHKKFFPKLELFPDFASNMYGKKL

NVLIVQQVPLTFVKWDKNNEMTEMSGANIALMQTLAGAMNFTPVILPKWNGTGFSVKTRTFDAWKFFKTTNTDITANLEPHFTEHISEESLRFRPIMAQEVGVLMPVEYAI

DKKYQDNAVESSIITLIIMMIFWFVGILLRLDKKIWNFSIIICLLFSFSVPRQPSKAYERILFLSLSMLGFMYSNQIYASLTNVAVLSLEEREFVTFEEIDASGLIPIVPIAHFERVFR

NAVGAELNLKKKSQIIVNIRDCPKMAMVYRNVCCIMYNTEGEYYRRLSRQDNGQYRLKFAKPILRSDNGAFGVRDTSPYKTKINYLIQRCFEAGLISKWYLEAISPSRSGNI

LNDDKPSRGERSATFRRQLMVVIVFGHSLATLVFFGELLVHRLRISHSNIDKSRLNLRKLWKMKTK

>DallIr128

MFITKTFLVIFFITILSNEFQSRPEIDWFESAYPHLSDSDSPHTALIIHYKGAHDADAIRDELFEKIIQTMPSASIEMNDEGIALKEFDFGNVSKLSTSLLFIFHTEYSGDNVQISRV

MHSLNKLADFSVNCYLLIILRTSSNLNRRLEDILHKAWKKTIMNIAIVEIRGINCNRLTKLSTDNQQFHDCEGKKYSAFSRIYDDSPKRVIIHQFNPFINTFYHKKFSTRRKLFP

NFANNMHGHDLKVRIINQPPFAAVTWNENNEMKKMSGPNIVLMQTITAKLNATPVILPNPKSMEFWLSNFTVEDLINESLNSDLTAHLCVRFTGHILEESVRSRHIITHELGV

LMPKERGINKITLYYAIESTALILVIMLTIWFAAILLKFDKKFFELSRIFRLILSIGVDYQPTRSSQRVLFLVVIMIGFMYSNNIYASLTNLGVDPLVEKEYKTFEDIDNSGLIPIIRA

PVFRKTFNDAVGAKLNLKKKSIQVIDSSNCLRMAMVHRNVCCVLFRAEAELYERLSHRKDSQYQLKLSEPIFWASDAAFRFRQGLPGKKTINEVIDRCNEAGLINKWYWN

MEGSADPNNNTNDDLHAQDNAVQTQLLIQLIVVIAFGHLLATLVFIGELLAHRFKNSSKGKRKVRFCVY

>DallIr129

MFTIKYLVIFFIIILPDELQSRPQVDWFESINTLFTAHKIHTALFIHSNNTDDSDIKDGLFAKIMESIPSVSFEMDHEGIVPKDLDIGVLSKLSTSLLFIHYAKYSGNPVQIYRVMH

SINKLADFSVNCYLLIVLETSSNSSEEIEDILQHAWNKTILNMAIVEIRLAANFNTSTTVIAEISKFSDEANRGLHKNIASRVIIHQFNPFIKKFYHLEFSSGKELFPNYAKNMHG

HGLKVVIVDQPPFASVTWKEDGEVGKMSGPNILLMQTITEKLNATPVILPKPKNMRFWLSNFTVEDLINESLNWDLTAHLCVRFTEHILEESVRSQNIITHELGVLMPRGYAI

NNKIINNILESSALTLVMMLAIWLAAILLKFDRKFWKLSTIFRWIFSISVHHQPSRNFERIFFFVVVMLGFIYANNIYASLTNLGVDPLVENDYETLEAIDDTGLTPMIRNPLFRR

TFKNATGVELNLKRRSIRVMEITDCTQIAILHRNVCCVLFKSEAEYHKQWSRTKNGENQLKFAAPIFWSHHAAFLFRQSLPGRKNINKVIKRCSEAGLLSKWYTHMTRGFG

GIAEDVAHVTDDLHTLRGQLIVVAALGHSLAALVLIGELLTHRFRNSFKKKCRRTKKSH

>DallIr130F MPIAKILLLIFCITILLDKTLSRPEVDWFESVSTRLLRSGDIHTAVIVHDLDTDDSDVLKKELFGKIMGNMPCVTVNVDDDILHLKKLDFGVVSKSSTSLLFIFYADYSGDNVQI

FKVMHAMNRVADFSVNYILIILRTSSNLDRGVENILQHAWRQSMLNMVIAENLNSRIDEDSSIQVIMHQFNPFIKKFYHDEFHPGIELYRNFAKNMHGHQIRVTFSDQPPFTY

WKAPDLKMGIRKRNNNAMTGPNVHVIENIAQALNFTIAYAIFIEDKYEWESRPNNYVNSINTVLYLLKKSATDIFANAMVLTTDETLDESLRSPLIMTNELTLLMPSDFKFNK

KLMNNAILSGVLTLAIIILIWFATIFLKFNEKMWKFSVIFGLIFSITITRQPLKTFERILFIVVVILAFMYSSDIYASFTTLGIDPLVENKYETFERIDDSDLTPIIQYLLFNKTFEGAA

GAKLNLKLIKXXKKTVPYFSTRFCPEMAMVHRNVCCIMTRIEAEYYKSQSHTNDGQYRLQVAKPSFWSDTGVFHFRWNLPGKTNMKKIIENFREAGILNKFYATPYMHPQ

NDQNDNAYEMDEQSQIHLLRQLVMLAVIGNSLAVIVCIGELLAHRFKNSVKGKVKLNLCGVFRRRMKQIQTYLLLTYRTLNVQVVLLLRAMRKYKIQLLDRRRWPKWLK

SFSRTADRQAQI

>DallIr131PSE

MSITNFLVVIFFITILTDEIQSRPEIDWFDSVATRLLHSRDIHTAVIIHNRNNSEVSDAVRDELFGKIMGTVPSVIAEVKDGLIELEEMDFGVVTNEFTSLLFIFYADYSGNNEEIY

DVMYAINDLTDFAVNYMLIILRTSSNLTRDIESILQYAWNESMSNILIVENRLVTNSKMFAKESADNSQFLGCGNLQCYGVNRKIVEDNSVQIIMHQFNFFTKIFYHEKFQPGM

ELFPNFAENMHGHKIRVKIWKREPHLIQAMARILNFTISTVVGVKNHLSFKARATVYKVS*LDIFTFGMLTGRASQLSATKCIVMKNLVLVMPNEYVFNTNLLSNTFASVIFIF

TVIIVIWFVTIVLKFQEKTWEVFKIFSLIFSIGISCKPSKSHERILFIFIFILGFIYSNDIYASFTNFGIDPLVEKQYKTFEQIDDAGLPIIVDHKLFIEEFYAGTVEAKLNLKKRIIFKDI

PCVKMAAMHGNVSCLILQNSAKYVEYKDRETSGQTRLKIAKPIFVSLPEVFLFRYGLPGKKKMNDIIERCRETGLLFRWYTSKYLKTSSQSDKTVIANQMEKETKTQFLRQ

LIVLSLLGQLLAIIVFLGELLAHRFRNSPKGEIKLDLRGIFKRKIIRREWYAINYCLNLTR

>DallIr132PSE

MSITNFLVVIFFITILTDEIQSRPEFDWFDSVATRLLHSSDIHTAVIIHNRNNPEVSDAVRDELFGKIMGTVPSVIAEVEDGFIELEEMNFGVVTKEFTSLLFIFYADYSGNNEEIY

DVMYAMNGLADFAMNYVLIILRTSSNLTRDIESILQYAWNESMSNILIVENRLVTNSKMFAKESADNSQFLGCGNLQCNRVNSKIVEDSSVQIIMHQFNFFTKIFYHEKFQPG

MELFPNFAENMHGHKIRVKILKREPHLIQAMARTLNFTISTGVGIQNNFSFAARGTDYNLS*LEIFTFALLAGGGAPQLSASTYIVTKNLVLVMPNEYEFNVNLLSNTFASGIFI

FTVIIVIWFVTIVLNFQEKTWEVFKIFSLIFSIGIPCKPSKSHERILFIVIFILGFMYSNDIYASFTNFGIDPLVEKQYKTFEQIDDAGLPIIVSEILFIKEFYAGAVEAKLNLKKRFIFK

DMRCVKTAAVYGNVSCLMLQDRAEVTEYDDRKKSGQHRLKIAKPIFVSLPEVFLFRPGLPGRKKMNDIIERCRETGLLFRWYTSQYLKTSSQSDKTVIANQMEKETKTQFL

RQLIVLSLLGQLLAIIVFLGELLAHRFRNSPKGKIKLDLRGIFKRKIIRREWYAINYCLNLTR

>DallIr133

MSITKTSLMIVLIAILADEIQSRPEVDWFDSVTTRLFRSGEVHTALIIHQRSTDYSDAVKNELFGKIMGTMPSVIVEVDGGVINLKEQDFGVVSVKSTSLLFIFYADYSGDNVQI

YETMHAMKNLTDFSVNYILIVLRTSSNLTRSVETILQYAWDLSMSKILIVEIRRLNSKKRNEITADNAKSLGYGKLKCYRVNGKVNEASSVKLIMHQFNFFSKQFFHEEFHDG

VKLFPNFAKNMHGYVMKSIPNHNSRLRYGQHKNEYQMFPLLFLRTELYKDMSRVLNFTTKELLLPSKWNRNSVDALIDFDNKVGKIDIMGPYSAASLPSTKMKIFFLEEME

DRDLVMVMPTTYTINQNLINNAVASTVISFVIFALIWLVAIILKFDNKTWSALAIFSTLLSITVPNQPLKTNQRILFFTVVMVAFMFSNDIYGFLTNLGIDLFVENEYETFEQIDN

LCSTPMVNKYNFYPAFKTADGAKFNLKNKSVNESIVSCLKQAEQYRHVCCLMDRGIFEVLTFWYGRTIARYQLKIAKPVFAVQTECMWFRHNIPGTNEMIEVINRLRQAGF

LRSRYSDPDSHSRLRALLQRTDAMDKRRTEESRFQLLRELIFLCALGYFFAVGVFIGELLVHRFGNSAKRKMKLDLPSVPDRKIERREW

>DallIr134F MFVTEIFRVICFITILLDELQSCPEVAWFDSVSRQLTDTYHIHTTLVVDFSNTSSFDFMKDELFGKIITSLPSITFSMDDQGIEKNGLHFGDVSKVSNSLLFIIYAEYPGNNVQMY

KLMDSINESADFSVNCYSLIILRTSSNMHRDVENILQYGWSKSMLNIVIVEIRRETDSRSTTKVSADNPKFLRYQNFNRKEDHSKICGDNASQLIVHQFNPFINEFYHKKFSPR

LKLFXAKNWHGYPLNVAVINRPPFAFIKWDKNNQMKEMSGPNIVLMQTLAKNLNFTPVIQSRLNTVEFWESDFTSPDFIRLFEIHGVDLVANLAIHYTNDTMEESVRSRTIV

TQKLGVLMPKRYYISKNHLHNAFKTTALMIITIVLLIAMFILRPDKKIWGVSCIIGLLFPIGVYHRPSKALERVLFIFVIILGFMYMNDIYASLSKFGVDCLVEHEYSSFEDIDDS

NLTLRIQAPLFKTAFRNAVGAELNLKKKTTKFADNIDCPQIAMVHSNVCCVMYETEVHFYKQWSHAKYGHNGFTSAKEFFWSGALAFTFRQGLPGKEYINKFIGRXPHEA

GLLSKWYPDSRSSMQDEGVRNEKSQTHLIEHLIMITIFGHSFAVIIFMGELLTYCLAKKIQEKKRAQCMRCI

>DallIr135

MCIIKTLLVIFLITILVDEIQSRPEVDWFDSVATRLFRSGEVHTVLIIHQRIADYSDVVKNELFGKIMGTMPSVIVEVDGGVINLKEQDFGVVSKNTSSLLFIFYADYSGDNVQIY

EVMHAMKKLTDFSVNYILIVLRTSSNLTRPVENILQYAWDISMSNILIVEIRRLNSEKRTVASADNTKVLGCGKLKCYGANGKFNEANSVKLIMHQFNFFSKQFFHEEFHNG

VKLFPNFAKNMHGYVMKSLGNYIWPLRYGQHKDKKKSFFVRKKFELYEDITRVLNFTTTQQIFLRGEWKGWRGNYTYGALLSYYNKTEKVDIMGPLSSMLLSDLHIKPFI

LEAMKDQELIMVMPTTYAINQALINKALASTVISLIIFALIWLVAIILNFDGKIWSAFAIFSALSLMVVHHQPLRTNQRMLFLAIVVVSFMYSNDIYASLINLGIDPFVENEYETF

EQIDDSCSTPMMQWYDVNDAFVGADGAKLNLKKKHVKGTLVSCLEKAVEYRNVCCLTDARTMYASRFWLRRNNGLHRLKVAKPIFASRTECIWFREGIPGKREIIEVIKRL

QETGLSSGWYSPADNPLSLQTDNHNRIGEMDEESRTQLLRELILLGVLGYSLAITIFIGELLVHRFGSSAKGKMKLHLPGVPDRKIERREW

>DallIr136PF

MSITKTSLVIFLITILADEIQSRPEVDWFHSVTTRLLRSDEVHTALIIHQRSTDYSDAVKNELFGKIMETMPNVIVEIDGGVINLKEQNFGVVSKNTSSLLFIFYADYSGDNVQIY

ETMNAINKLTDFSVNYILIVLRTSDLTRSVENILQHAWDI*MSNTLIVEIRFSKVSTDNSHFLGCGKLKCYGANGRINEDSSVKLIMHQFNFFTKQCFHEEFHHGVKLFPNFAK

NMHGHVMKTFRGYNRPLRYGEYEDKKNSSLVRKAFALIDDLTRVLNFTTREQLILRGEWKGCRGNYTYEALTDYYRTINKVDIVGPVSTTSVSGSIIQPFLLRPMKERELIMI

IPITYKINQNLINKTVASTVILLILYXLIWLVAIISNFDEKICNTFAIFSALFSITVHHQPLITNQRLLFFAIVIVGFMYFSDIYASLTNLGIDPFVENKYETFEQIDDSCSTVITSWYD

VDPAFEGADGVKLNLKKKSVNGPLMPCLDMALEYRNVCCLTDRQRIDESRFLLRKNNNLHLLKIAKPIFGSRIESIWFWEGTPGKKETIEVIKRHREAGLSSGLYSTDDDPS

WLRTNKHNNADEMDEESRTQLRRELISLCALGYSLAIVVLIVEIFVYRYRNSAKGRMKLNVPIVFKKKIKRREWYAISRRFNSVELIFINHFYFPSFQLEKSKPSYYSHLRA

>DallIr137PSE

MTHIFAIINSFEWMNHWKQVHRSYLSAPTRIALLITGSCTDSHVKSIKSILHGFWQREMLNVIAITPTQDLPLIHTYNPFLVGTENPPGELMNLTSEFFPDKLKNLHKYPVRIA

FYENPPYVYPKTHPAPMDGGDYALMTFLSERLNFTMKSSMKQVTFADTFFQLSNRKRTAAIGDLLMRDTDILGNSFYLESINGQELDILYPRWRTALVVIVPRTRPIRGILNM

FSSVDLTVVILFFIVMILLVVYLRVEKDTHIFIHVWRLLIYQHFDFIGTRASERLFCISFVIWSFFLVEFYEGRLVNDLSSSFYKDIKTLRGLIDSKLTVLVPSWQQTVLSHSSIQE

RMELVGQLEVEGNFTKCAQRAVEAGDVGCTMDANAADYFKDHIAKNAYEETNDGTVKGQLRVMEESLMSFWRLHATRKRFFLKDKLNEVIGIIQEGGLLKKWESDEKD

RQFREHVEEQKESVGMDKMGAAFQLLMYGHCLATGQLLIELAWHAFKKNHLRGWDDSEEAFVG

>DallIr138

MEKRLRILTQSIINQELSYLMNTPFEKEQWLSFKKLFPLPFHNFQVDHAILNFITMGYTSLRPVFLVQEDGFVHPYIDSICPKLRHVVGIFESIDTVHPINWKMLYGSTCLSRTK

IVLWITRHADDDDIKSILKAFWSLDFLNVILVTMSDDSTNHGLAVHSYDPFWVNKGGVRGKVYTLAVADLLYPNKMKNLQGYPIAVSMYDTFLSHPVTNISQLRANSDVELLLSLSSWLNFTIDLRSRPISTAEYYRMKSPNGTVVGIIYDLITNYSEVLGNSHIWGKASDRVEFLLPHARFISEAVVPMPEVIPEIICIFKSFDVMTFILLILFSFISVIYMYSKGTN

APVLNTFRLIIHHQFYQVGTRVSEKVLAISWIVFAGLFLLIQQSHLIENMTNPLFEKRIDTLKQLADSDLTVMTDAEHFPLLNRSRDEVMQKIVSRITTKHSSRYCYERLIAGG

NVACFLNTVIISSVRSKPEITQSYLKIPKMHKMREIVGQYWRAIIVKKGFPYLSKFNAGIGRLMQTGFVTKWQARDRERLKPRVIHADDAVPLNLSHFRGPFIIFLFGIVVATC

AFIYEIVIYRVKY

>DallIr139

MLGFGDDSGKNASFNFKPKIIILEGDSPEQLESDLSSFKETQWWNYMAHYFILGINQNQCENIVAILTTAWKMNIIKSIYICLNTENMPELYTLNPITNYALTPWERIEIPLVKG

AIYRQLFDANVSCQNLHYDKTKVLNGFKITGVIAKFSNKKAKDMNVVNQMALNFKKILNVSIALKLKPPGDLVIQTIADGTADMVLNYGFMYWNPERQFLFPYLWTQVM

AVRKFNGYLSTLEKIDNLWSVPIRVLALLIFSIFFLVMVYENRDISSAMLELIRLLTYVSIKTTREKLSFRIFFSMMMMFMVISNGVFQGAISSFLTKPQHAKGVDTVDELRDL

NYTLYTIPGTVERAKEECPDNEVIEVPLEVCPELLLKSSRAVCVTFREFFYEFYGNSSLTLMKQPLKSTYFNHKCRDDWPLHQRVNDYFVQTFEAGLINYWLTEKIRLTMQK

HRANEMGLLSPNYKPVQLKALDFVFKLLAIGLCLATVVFLLEVLAKECKIDLWLLR

>DallIr140

MVIVGDFDGRILMSLIESIPIPIVTIDSHSEFIFGDASDGLYVFQPDIIIMAMEDSPKQLGNDLQLLQEMNQWNHMAAHFILEISARFCKDALESLLITWRMHIPQSSYVCLNAE

QAIVLYTLNPITNYAPKPWQAITSADRFNSSDRWTLYSQLLNPNDIACDSLTFDRMKHLNGYEIKALTAPKNNVSFIPGKNYKQAGYKMLEFFGKTVFDTIITRLNATLVLQID

DIHIIPQYLANQSMDIDIRFTLSFSKTNASYLYPYFQPEVIAITRIKDYLSTFEKIAQLWSRSVLVLSFLTILITFGVMAVYKRQGFSLALLEIIRLLSYASIQNNFQSTAMRIFFSKI

LIFIVITNGVFQGRLAAFLTKPEEGYSPENSEDLKNLNYTLYGIQQNVKYLRTMFPDNRVVLVTQKDCVEMALASLSAACVGTKAKYLNKYWMKPIHTTREPLFVDYWNH

QCRKDWPLKHRVEAVLTQIMESGLLARWAFHSISTVLDKKRAEDVERAATKYRPVELKALDFSFALLAFGLVLATIVLIIEFLMKRESNTKIREEIKFRNFFIARRTTI

>DallIr141

MECWLALIMAMMLPCVRTIVIPEEENLRIEDPSNRELINPETDVAKSELNELSKTVVCLMKFVELYMNQLPSRISVLLMETDDPDFSGVYLSKLQQVRSTYILNGYLDSDSD

QNTSLDALLILKSYENLENSTSRLIDLCGRDCRYAVVVTNLFPDEASFMEEAVNYVKLLWIKRVANVVILGPVGNTLLAAQSQGFLANKLTEPSDPIPIGKCHQGEWITTTEV

FPVLKMNNSHIHFAIIDHEPYMSVTWEGDHMKARGIELKIINILRDTLQFRSTGSLLEWDEGNTVEDEIIEEFKSDRKIDLVVGGLLRTMVKDVDFALPYDVTQVVWLVPSHS

NISLLGLISPFTLKIWILTIASIIFGGMIKSLLFDKMSFLEIMALVIGVAWHKQPKRLSYRIKFMSWVLFGYVLTQVYLASLAGQLLAHGDLQINTMQELVDSGLIFGGTANHKQ

FFMQTDDDNDGEISAVDTIYKQFIVFSHEDYMKKLTQLMQGENTSLALVAVLNISSASTSVHHEMYHIVKETLATTPLAFPAWRGLPYLTQIDSKLAALIQGGIISYIANNETT

VQHIHDAIEEKTDANLELVDIAPSFLLLVMGHGAGMLCLLGEFAVFRWQNRKPKKVVKGTKVRRLKGVAKRTVRFDEKNLRLTKPNNGVRLVLRPNVTIGYRDGRLPWKI

V

>CcunIR25a

ILLWLLVVGEGGPVTAQYNDVINRPVNVFVINDAGNDVANKSVTNSLRTLKDKNPDKLGQVYVVQVNISDSKETLNAICDLWKSAITDNQDNIPDFVLDTTTYGIGAETVN

KFTAFLGIPTLSAQYGQEGDMLGWREISEDQKQYLVQVMNPADLMPEVVREQCSHFNISNAAILFDESFVMDHKYKSLLLNVPTRHVIVPTKPAGTALREQISRLRDLDIVN

FFVLGTEATISAALQAASNLGFTDHRYGWFGINLNEDFTIQCPDCKRARILVFKPEMSTSQQQLNELTSKGALPKPWIQSAFYYDLTKIGILAMKAAIDAGEWKLDRRRFML

CDDYNENVTTPLRNLDFRKRLKLVTGGGSVFMPTYAGFGWGNKNGESQAKFEANGVAIQIRDSRVTSEEIVESWQAGVDVPLTIKNPGIAANQTAVTSYRVVTVIKPPFIMH

DNKTGEWSGYCIDLLNKIREHVKFEYTIEEVEDKEYGNMDEQGNWNGMVKVLKDKKADIALGALAVMAERENV

>CcunIR75q2

MRLFPGIWLWLISMRTSGFIVDGCESDQAKELVELLIELKTRGLSTFSRVTMFGCSDDKSQVARRLSRALVANSMHELDSNQFSWNLQKSVASTPDHHLLIVLEVDCPSSERL

LLEAKNATMFVSPYKWFLISRGCSSVDCVLSKLSELRRNVLPDSELLIWLKQSQRLVSVYKVSAEQGRDWQIEERARSIACDNATFNLLLDDDSAMITSRRRSDLRRTHLKS

SLVITDYDSLQHLTDYRNREIDTSSKCNYPWAKFLASMLNATISFKLAPTWGYPRANGTWDGMTGMMQRGEIEFGASHSFVTGERLKVVHYLAGLTTPSHSRFVFRRPALS

SVANLFALPFRGSVWIGVLALALLFGFLLYPAMVLEWRRHRDGTIEPRVGDETIVVVGALAQQGFWYEARAASTRVLVLAGLLGFLSLHAAYAANIVALLQSTSSSIKSLKD

LLASPLDLGVHDTVFNRYYFKSLGSLEPKIRGAISEKSEWLGLEEGVRRLRRGHFALHAVLGWAYKVVHETFEEDEKCDFEEIDFLNVFEPHMVVAKFSPYKELLRVKALRI

RETGMRTREINRLYSTRPRCDAAASSRRFISVGYAECKGAFYALGYGLVVALLLFAAEIAHRRLRLGIRSNRLKR

>CcunIR93a

MMLSLLLPFLLRLGWTNGYNDFPSLMTANATMAVIIEKGFFKGQDEYRNALTDITDIVIGIIKKNMKQSGIDIFVFGDTNINLGRDYTILLSVATCQTTWNLFKRAQKEKLVH

LAITGPDCPRLPESDGISLPFIDPGEELAQIFLDLRMSSALAWAKVNFLHDDTFDRDTISRVVKALSVELPNKKLLLSTRAIFSVQYDKSDSVMKQRIHNMLADFHVDQLGSC

FMVIITIDMVSSMMEVAKSLKMVHPRSQWLYVISDSASRDTNVTMFLDLLTEGENVAFIYNTTSLDLECKLGLTCHIKEFVRALAKSLENSLKTELELYDSVTEEEFEVVRLS

KAERKDEIIKSINRELSELRAGTTNTCGECISWKIASAITWGASFSINNEAKQQEQKQKQEHHKNKTELIKKSVGELVDSGTWSPAPGIKMNEMLFPHIQHGFRGKSLPVSTF

HNPPWQILSFSNTDKPEFRGLVFDILNYLSLKLNFTYMVQLPSGYDMLSKFQPNNTTVKGKKINKFDVNEAAISVARKVPAEVIELVGDGRVFLAAVATTVSENTKNVNFTY

MIAQQAYALLSAKPKPLSRALLFMAPFTSETWACLSSALLLIGPFLYVMVKLSPKPIELNEVVGLSTTWQCSWYVYGALLQQGGMSLPKADSARLVVGTWWIVVMVVVAT

YSGNLIAFLTFPRMDDPIDTVDNLIARQNQFTWAYPNGSAFENYLIAAAQDTEKYKILLDGASQEDPSEPKRVLAKVKDSNHVLIDWRTSEAFLMRLDLMDTGVCNFHVGT

EDFLHENMRLIIADNSPYLELVNAAIIRMHESGLINKWSLDILPLKDKCFVTKGNQEVTNHKVDMGDMQGIFFVLAIGFT

>CcunIR8a

MSRARRINVQLVFLLSFGLALVASQAPVTLLLVIEQPDAEIMGNLNDVVSEAESQFGANLIKIDVKLVQVDREFVDENYDRVCAHLYNGITMILDMTWTGWDKLRDLARDF

NIIYKRADTTISSYVQAVDQTMMYKNSTDAALIFENEKELNQTLYYLIGNSIIRLVVIESLTAREVDRISNMRPLPSYYVIYARTKQMEELFKTALEGGLVKRDMVWYLAFTD

NNHADFSYFRDSNNPNVSVNVFTMKEEVCCHLMYTVAPCNCPADFVIFHHYFRRLVQLIVETMSECQAANRLQEPQSGQCQNKNATENSVNATLSEFDKRLLAKIEKNDT

FEYVTARTLVTYKAAADLKLLKKGQLETIGTWSRDTGILPLPNKTIQAARRYFRVGTVDAIPWTYKQLDPDTNEPIKRPDGTYVYEGYCIDLIDRLAEMMDFDFDLVIPQDG

EFGQKVNGFWNGLVGDLSKGQTDIAVAALTMTSEREEVIDFVAPYFEQSGILIVMRKPVRKASLFKFMTVLRLEVWLSIVGALTLTGVMIWVLDKYSPYSARNNKHMYPYP

CREFTLKESFWFALTSFTPQGGGEAPKALSSRTLVAAYWLFVVLMLATFTANLAAFLTVERMQSPVQSLEQLARQSRINYSVLENSTIHQYFKNMKMAEERLYQVWKEITL

NSTSDQVEFRVWDYPIKEQYGHILQAIAQVGPVKTIEEGFQKVEASENAEFAFIHDSSEIKYKVTQDCNLTEVGEVFAEQPYAIAVQQGSHLQEEISRKILDLQKDRYFEQLSS

KYWNQSLKGSCSNADDNEGITLESLGGVFIATLFGLALAMITLAGEVIYYRRRNTRQDDSLQQSKNGTNNSGSISGSIQDVKQTKELDIQKLAARLQLKPAPPVAFEQKPSSL

NTTKPRVSHISVYPRPFPFKD

>CcunIR75q.2

MHRYIRQQCVYVSNNINMKRCTNSLWKCLLFSLIRLEILRVGQVSCRHIDESISNLVVEVSTVSFFPSAAISSLRCRHSDDNVIFSRILSENRMLHNHLSFDDFQKDDFPLHKIV

IFLDFKCHGAREFLLKANSSEMFSAPYKWIIFQDLEHSSPDNCTDGCAFKDFYSYAMYPDSSVVILQKLSKERVQIVSIYRPSPVRDMIVENLGYWSSTNGTKWHNLNIASQRRKNLQKTPLKSSIVVTNPDTLNHLTDYHDKHVDTITKCNFVWLHQLIDAMNATVTYSIVNTWGYRDKNGSWTGMTGQLSRKEIDIGGTSMFIIGDRWNDVHFIPLSTPTR

QAFIFRQPPLSFVSNLFTLPFRPSVWIAIGILLMIIFAMLLLATKWEWRKVYADREFSENEPKPNLSDQLLLILGVCAQQGFGRSPYTVPSRIVLLMLLLAVLNLYASYSANIVA

LLQSTTTSITSLKDLLESPIKCGANDIVYNRHYFKLEKDPVKRAIIDKKIEPKGSKANWMTADEGISRVRQGFFAFLIETGPGYRILQETFEEDEKCGFREMYFIDHFDPMFAIV

KRSPYKELIRVNSLKIWESGLKSKEMSRLYTKRPPCNGRNKFVSVGLNECYFAFYIIGYGVLFAILAFLVEILSKKSGSLRKRQPVESTARTSFAQRNLQQNSARESPFSAS

>CcunIR76b

FPSHITVTTYSDMPYSRYRKLDNGTFVGEGFAFELLALLMKKFKFTYTIIPPAKDIIGDESSGMIQQLYN

>CcunIR75p

SENEPKPNLSDQLLLILGVCAQQGFGRSPYTVPSRIVLLMLLLAVLNLYASYSANIVALLQSTTTSITSLKDLLESPIKCGANDIVYNRHYFKV

>MpulIR8a

MLATFTANLAAFLTVERMQAQVQSLEQLARQSRINYTVVANSSTHQYFENMNKAEEKLYQVWKEITLNSTSDEVEYRVWDYPIKEQYGRILLIISTVGPVQNVSEGFSKVIE

SKNAEFAFIHDSSEIKYEITRNCNLTQIGEVFAEQPYAVAVQQGSHLQENISRTILELQKDRFFESLSGKYWNKSANGKCSVTDETEGISIESLGGVFIATLFGLALAMITLAAEV

VYYRRRNAAQDETKRQETNPDRVRSGKNTFERILSKSKLHQLKQSSNTAFTTRNRGLRPRVSHISVYPRVFPFKE

>MpulIR75u

MTDPDTLNHLTDYKNKLVDAVTKANYIWLQHIAERMNVTVNFTWRNTWGYRDKNGTWSGMIGLLDRGEIDFGGTGTFLVGERIGVVDYVQLYTPVGSRFLFRRPPLSYT

SNLFTLPFDRIVWIAIGVLLILVYVLSYISMKWEWNKIEKKQIDSHLPGELESDPSLSDNFIVVLGAVSQQGFTYEPYTISSRIVVFVLLIAALSLYASYTANIVALLQSTSSSINTI

QDLAESGLKIGVHDIVYNRYYFGSFKDPLRKDFYERFVENKSDVWMPLNEGIQQLRMGLFAFHGDSSCGYEIIQQTFEEHEKCGIHEIDYLKVLDPMLVIKRNSPYREIFRVG

AQWVRETGLQKRDAPKLFTEKPICTSHASFVSVGTTECYAAFLTMGYGMTISFGLFLLEIIWNKSFGHDKRTDIETNDTPPEGNVASAELESID

>MpulIR64a

MEISSFIPLLSILFSSTFTRGNLLSNLAEDYFQNIYIEQVVVFGCWDEHERVEFVRSMMQSDFRMTYVNIQPGLSMEKILKVNYYKLGIILDLDCQLNHIIFDQFWEQRLRHNE

SYFWLMPMSQSETIPNYFEQLPLNIATEMTLAILNNNNASYTLYDIYNPSYRHGGKLNVTYMGRWGLKDGLKIELTQYKYKRRGNLHGLVLNASIVIDHPPVPDYITYINNPI

KPHLDTMHRYNYALTRQLRDYYNFTMNLSRGTTWGYLVNGTFNGILGDMVKGIIDFGATPFQYKPERLDVCEYTVQTWLARPCFIFRHPSKNNVSNPFLKPFEMNVWFWI

AIFGVLNWSLLYMTAKIERVLDWHPPVNTLDTHPASECALIASAAICQQGLSDGPRIYSGRIVFMSLFLWGLLLYQFYSASVVGSLLAKKPRWINTLQDLVDSNLEIGIEDIAY

NYDFFATTLDPVAQQLYREKVAVNKKRKKLPYFTVEEGILRMKKGGFAFHVDVASAYKIIEETFTSAEICDLVEIQLFPPKHTATATSRFSPFKKMVTYGMRQVVEHGMAKRL

RDIWMHRRPECPESHNEDPVPVVLEEFSPALFLLSCGIFCAFTAMLGEMYIIRRNNSKVNLANDQPENVNDGNPFGKIISSATSTRSKDPENHIP

>MpulIR76b

MKLLHEKEVDMAVAFIPILPELLPYCSYGPILGFTDISVILKRPRVSAVGSGLLAPFSTPVWICILISLIIYGPVIFYFTSYRSRLFGGIKQDTFTLYGSIWFSYGALLKQGTAYAPI

NNSTRLVFATWFLFITIITSFYTANLTAFLTLSEFTLRIKSVEDIVNTGTYWTAQKQHIVDYALKAGHAGTLEELKYSLKYDYGQFVDVPWETKAQEIEKIARTDQVFITEMNLI

DTIIHKDYMMRTHMNIIEKRRCTLVMVPQQLYRQNRAFAYQPKSPVQEKIDQQLLHLIETGIIMHMESIPLPIVRYCPLDLQSKERQLSNDDLSLTYKVIATGYAIAIFVYVIEM

IQRWTNYGFCSCFEEACPCCQNRTIIVPQERPRIPTAPAAPFTIAIPKDPVRKSSNNPDIARKEVFNGRDYWMITQQDGFKRLVPIRSPSAMLFQYTS

>MpulIR25a.1 MAPFMMKDPETGEWSGYCIDLINEIRAILNFEYEIHEAPDGQFGAMAPDGTWNGMIKELQSKRADIGLGSLSVMAERENVVDFTVPYYDLVGITILMQKPKIPTSLFKFLTV

LENEVWLCILGSYFFTSLLMWLFDRWSPYSYQNNKEKYIDSEEKRIFDLKECLWFCITSITPQGGGEAPKNLSGRLVAATWWLFGFIIIASYTANLAAFLTVSRLDTPVESLED

LSKQYKIQYAPNFPSEAYTYFERMAAIEERFYEIWKDMSLNDSLSDIERAKLAVWDYPVSDRYTKMFQAMKESHFPSSPEEALKRVRGELANYSASEFAFIGDATIIKYLEMT

NCDLMVVGDEFSRKPYAIAVQQGSPLKDQLNNALLQLLNKRKLEHLKNKWWNNNPLKRVCKKEDDQSDGISIQNIGGVFIVILVGIILACGTLAFEYYWYRYRPIAMAQQT

RQTEKFASREVKPIRFQLKPAKGAFNNAEFRSRF

>MpulIR1

MALLFAVIVILVTTAMSLPPVIRIGAIFTEDQKDSPSELAFKYAVYRINKDQSLLPNTTLVYDIQYVPKDDSFRTSKKACKQLSRSVQGLFGPSDPLLGAHIQSICEALDVPHLE

ARMDFESTFKEFSINLYPAQDHLNKAFKDLMSFLNWTRVGIIYEENYGLFKLQDLVKSSPSSRSEMYIRQASSGSYREVLREIRQKEIYKLIVDTDPANMQQFFRAILQLQMN

DHRYHYMFTTFDIETFDLEDFKYNNVNMTAFRLVDLDEPKVAEVLRQMERFIPIGPAILNRTGVIQAEPALVYDSVQVFAHGLASLDRSHVLRPVNLSCEKEEPWDDGLSLY

NYINTAELHGLTGHIEFNEGRRNNFKLDLLKLKKEALVKVGEWRPGHGINVTDVDAFYETTSTNITLVVMTREEQPYVMVKNDKNLTGNARFEGFCIDLLKWIAQQVGFQ

YAIRLVPDHMYGVYDPETKEWNGIVRELMEKRADLAVASMTINYARESVIDFTKPFMNLGIGILFKVPSSQPTRLFSFMNPLAVEIWLYVLAAYMLVSFTLFVMARFSPYEW

NNPHPCLAESDVVENQFSVSNSFWFITGTFLRQGSGLNPKATSTRIVGGIWWFFTLIIISSYTANLAAFLTVERMITPIENAADLAEQTEISYGTLEGGSTMTFFRDSKIGIYQK

MWRFMEAKRSAVFVSSYEDGIKRVLEGDYAFLMESTMLDYAVQRDCNLTQIGGLLDSKGYGIATPKGSPWRDKISLAILELQEKGVIQILYDKWWKNTEIGRA

>MpulIR2

MMKIVTISTGLILITLISIGYSLPRPINIGAIFHDGDEINHDAFMRALAILKAEEIAPSFELVPVVRWIHSSTDSFMTSLRVCELLDAGVAAIFGPTSPHTQDIVTSITSQFEIPHIHY

AFRRTDEKPLPHTTVNVYPDSEQISQAISDLLDAMNWIQYTIIYETDNGLSRLQKALMKHGPHNYPITIRQLKPTFDRHHQPDYRPLLKEIANSTVYNVIIDIEPENLLTILKQA

QEVKLLRDYYNYIITCLHIPSPVMLAAVNGSEANITAIQLVTDEAYDLISVESALIFDSVFLLNDALEALEARNGLNGDQLQIKPPQLSCTGDEKYEAGHNITSLMRQVASVG

RSTGLMKFNDNGGRIFHLTFQEFLSGKAFESGSWEEGELKVTRTQKDREASLIQNIESRRFKVTTKPGDPWAIEVTDGSTRGIQVGNKRYEGYAFDLIQVMSEVLKFKYDFE

VVDASYGNYNPETKQWDGLIGGLLRRESDMAVCDLTITKVRESIVDFTTPFMNLGISILFAKPENEVPELFTFLSPFSADVWIYMATAYLAVSVMLFVQARMAPGEWHNPHP

CASEPTELENNFNLKNSLWLTVGSLMQQGSDILPAAPSIRMVASMWWFFVLIMVSSYTANLAAFLTEKKIDR

>MpulIR3

MTSIKTETALMYDAVHLFAKALHVLDESQQLDIKPLSCESSDTWPHGYSLINYMKIVEMKGLTGLIKFDHQGFRSDFMLEIIELNSKEGLKKIGTWNSTEGVNFTRTFGDVY

TQIVESLQNKTFIVTTILSAPYCMLKESSDILRGNARYEGYSVDLIHEISRILGFNYTFNIVPDKKYGSYNKEKKEWDGMIKELLEQRADLAIADLTITYEREQAVDFTMPFMN

LGISILYRKPIKKPPNLFSFLSPLSLDVWIYMATAYLGVSVLLFILARFTPYEWYITRPCGKNCDHVDNRFKLINCLWFTFGSLMRQGSDILPKFSPYEWENPHPCNGQSDVCE

NEFTLLNSLWFTIGSLMQQGSDIAPKAVSTRMVAGMWWF

>MpulIR4

MEIAWYFIIVIVVVLSQHVNAQVKIKMVVIIENGETQHLGPFNDVLLDAERAAGGNEIINIEVKPVQLDRDNIVESFEAVCKELFDGITIILDMTYTGWDKAKNVASTYSIIYL

RSMSSIIPFVQCNDDLLQEKKATDVALIFESEKDLNQSLYYLIANSITRLVVIDELSEVTVTKIRAMRPTPSYYALFASTAKMEGYLNTALQRGLVARNDTWHLIFTDMNYKHF

RYINGDDDLHNPIVILSMNPNLCCKLLSQTSCNCPHDIQIFNKFIERLIYLLVATLRDIYKAGIDLEPKTGQCIVENELTSTGQSATIKMFNETLYSNIAMDELFDYNSDKSMISYRAVIDIERLDKERRIQMANWTLRDGLTTPAGSQIRAARPYFRIGTAYAKPWSTIKLDPITGQPMTDKDGKEIWEGYCIDFIEKLSEKMNFDYDLVIPKDKSFGVKQPNGKWSG

VIGDLARGETDIVVGALTMTSEREEVIDFVPPYFEQSGILIVMRKPVREIALFKFMTVLRLEVWLSIIGALAVTAIMIWILDKYSPYSARNNKTIYPYTCREFTLKESFWFALTS

FTPQGGGEAP

>MpulIR5

MDHNIRNGTRNKKKMWIALNSFAIFACIVTAHPVKEWKYSGSLSYEPSVIYKNESLPRLSIGLMVPHTNFGAREYTKAINKAISNLHKASRGLRKYSFFENYQFTQHHIRNV

MMELAPTPTAILNSLCKEFLTVNVSAILYLMNYEQYGRSTASAQYFLQLAGYLGIPVIAWNADNSGLERRASQSSLQLQLAPSLEHQTAAMLSILERYKWHQFSVVTSQIAG

HDDFIQAVRERISDMQDTFKFTILNAVLVTKPVDLLELVKSESRVMLLYATREEAIQILTDARDLKITGENYVWVVTQSVIENLQTPNQFPIGMLGVHFDTSSTSLVNEIATAIK

VYAYAVEDFVNDPNNVNYSLNTALSCEGLGESRWDTGDRFFRYLKNVSVEGDQGKPHIEFTQDGVLKAAELKIMNLRPGVSKQLVWEEIGVWKSWQKEGLDIKDIVWPG

NSHTPPQGVPEKFYLKITFLEEPPYINLAPPDPVTGRCLVDRGVHCRVAKESEMTEMDIQSAQRNESFYQCCSGFCIDLLQKFSEEIGFTYELVRVEDGKWGTLENGKWNGLI

ADLVNRKTDMVLTSLMINSERESVVDFTVPYMETGIAIVVAKRTGIISPTAF

>MpulIR6

MKFHYVIMVLGGIVSVKSTTKIWKKNDNSIERTNSLSLLSHHVVDTYFHGCAVIAIHDDIVFKRHPGLLRNIFRNSPGVTFVQQHLNITRTEPPLRFRDKCYHFMIFLDNIYDL

SKIIREESVNKVLVISESTPWTVKEYLKSFPSRSYVNLLVITHSMSQRTGEGSYLLYTHELFTDGSGTSLPVLLTSWIGNRTTHENIDLFPEKLSGGFKGHRLVVATAHKPPFAIR

TDIVAKRSSEWDGIDIRIIHLLSKTLNFTADFRDPTAIDSPIYAVTTDVLNGQASAAVGGIYRTTNITSKLDTTFSHMEDCAAFISLSSLALPKYRAVMGPFKPAVWILICLAYFV

AIIPLSMNTNYTLWSLIIHPSRFLDMFWYVFSTFTNSFVVENPLLDTGLAKNSTSLLIGIYWVFTIIITSCYTGSIMAFITVPMFPQAIETAEQLLDEGYDIGTLDHDGWEIWFN

WTTIDDKVAVELLKSIEYVPTVKEGVKNASSAFFFSYAFLGSKIVLDYIVQDEFTPSWSNLRSTMHVSQECFINFGVTFVLQKNSIYTEPFNSVIHRIRESGLGDKIIRDVEWDI

QRTADGQRLPISDDYKRRKVVIEDRKLALDDTQGMFLVLGAGVLIAALALTIECCVKVYKEKFSGIITDAHTSVTSDATVPPMDYLKVYDPRNSEGSDTGMRRYNRFSI

>MpulIR7

MPFMTLGISILYKKPTKAPPSLFQFLAPMSLEVWLALMAAYVFTSLLFFVCGRICPAEWNNPYPCVEEPEVLENQFTLTNSLWFTIGSIMQQGSEIAPIGTSTRVMAGVWWFF

CLIMANAYTANLASSLTVENVHRPIKSAEDLANLNGEIKYGAKKDGATYLFFKGSNYSTYAKMYKYMEDNADDVFP

>MpulIR8

MTGYGLAFARNSKYVEMFNKRLLDYRENGDLERLRRYWMTGTCKPGKEVQKSSDPLALEQFLSVFYLLMVGILFAATFLLLEHLYFKYIRHHLPKSDKGGCCTLISLSMG

KSLTFRGAVFEAQDIIRQHRCKDPICDTHLWKAKHELDIAKMKIRQLEKDLEVHGIKPSQSRDKHEKLD

>MpulIR9

MLVGIVAIHAATFMIFLFEWLSPAGFNMKKNPSGDHRFSLSRSYWLVWAVLFQAAVHIDSPRAFTSRFMTNVWAMFAVVFLAIYTANLAAFMITREEFHEFTGLDDPRLAKP

WSHKPMFRFGTIPWS

>MpulIR10

MESPIESAEDLAKQTKIKYGALAGGSTAAFFRDSNFSTYQRMWSFMQSAKPSVFTKSNVEGVEWVIKGKGSYAFLMESTSIEYVIERNCELTRVGTELDSKGYGIAMPPNSP

YRTAISSAILKLQEEGKLHILKTRWWKEKRGGGKCREDTLKSGSTANELGLANVGGVFVVLMGGMGVACVIAVCEFVWKSRKVAVEERVSVVK

>MpulIR11

MGATINNVEDLAAQSKIKYGAIKGGSTASFFSASNVTMYKKMGQVMADARPEVFTKSNLEGVERVAKGKRTYAFFMESTSIEFHVKRNCDLMQVGSLLDNKGYGIAVPPN

SPYRTQLSGAILHLQEKGILRELKEKWWSMGSKNCSDVDPSTDSGALTVGHVGGVFLVLIFGLALSILIAIFEFVWNVRKVAVEEKITPSEAFIAELKFAVNVWVNEKPIKISH

SSNASKSSASDSGFTRAAS

>MpulIR12

MESTSIEYIAERECDLAQINGLLDSKGYGIAMRKNFPHRNKLNTAVLQMQESGQITDLKKKWWREKRGGGHCLTSGGGAAVEKLTLDNVGGVFVVLVAGVAVSILYTAWE

MLWGIGCTAYKERVPFKRELMDELKFIARCRGTVKPVKQRHDSSQSAHESTGGDDTPPYGGFVPTIITTTHEKDQP

>MpulIR13

MMYSITFKLAFFCSSAFFIHSTVSFNDFPSLMTANATMVVVIEKTFYERKVLAKETTVTTREAYEKSVANFVSAVTKKARERMNMSGLSIHAFQDTGVNLARDYTILLSVAS

CSTTWDLFRRARTEKLVHLAINDIDCPRLPIDEGVSIPLIEPGEELPQLFHDIRMTEKLKWNRAVIIHDDAFGSDAIGKVIQAFSHESSDSANNLGSTSLFSIARGSSEKITKQRI

KQLLSTFPPRQPIDDHFIVFVGHETIPHIIEAARALGMIHPASQWFFVVPDIAKFSHGNITFLIEYLSEGENIAFLYNETNQNLRQDSSCHDGAVCHAREMIGALGIALEKALLE

EIQLYERVTEEEYDATGIDKFARSRIIITHIRDELYNDSKSYEVRGSMCGRCIRWVVASAITWGNHIGPTDHNEPHELRQTGIWTPDPGFEFTDYIFPHVAHGFLGKTLPVATYH

NPPWQFLTTKPEASAELHDTMGNNWDGFVFDILEELMKKLNFTVKTIVVDS

>MpulIR14

MYVVHLWSVTKTDGARLIVGTWWLVVMVIVATYSGSLVAFLTFPKMEPAVETVDDLLERREEFTWTIPAGSFIEDFLLVSTTEGLIGYKQLLQENKGNAGKHDSVTYDENV

EEVKGGKHVVIDWATSLKISSRNEHLNTGECFFSLGNDVLLLGEPISMALPSDSPYLRIVNTQ

>AdorIR93a

MISVLLLVWCINYGSSYNDFPSLITSNATMAVVIDKGFFSNKDEYQNATKIIQDLITDTVKKEMNLGSISMRVFRDMNINFKDYTILLSVATCYLTWRLHEVAQKEELTHFAIT

DPDCPRIPDTDGITVPSIVPGEELSQIFLDLRMTDILSWNVINILHDDTFGDKATSSNDNVTILLSNANTCSRLVSDRDTISRVLKAISNKLPNKRMNLISRSIFSLRHGNTGSER

KSSVKKTLNDFHVEQLGHCFLVIATVDMVADVMSVANSLNMVHPGSQWLYVITNSVSGNLINTTFINLLTEGGNVAFMYNATNLDGFYKIKLKCYIKDLIEALAKALEYSLT

NEIELFKRMNEDEFEMIRLTKSKRRAELLKNVRIHLSRNTSASNNVCEQCLLWRFFSSITWGNFFSRNKNMAHLLDIGTWTPIIGVNLTDVIFPHIVHGFRGINLPIATYHNPP

WQIISMSKTGKKLYEGLIFDAINYLSMKLNFTYTVIMPETSQIPRSWNTSQFAKLGEKIKEMTMSTTKKVPLEIIDLVRQKKVLLAACALTVNECGNTTFNYTVPIFVQTYSFL

TAKPSQLSRVLLFASPFTKEMWACLAVSIIIMGPILYLIHKYSPYSTKASGLNSSWQCVWYVYGALLQQGGMYLPHNDSARILIGMWWLVVMVLVATYSGSLVAFLTFPRMD

TSILSVEDLIAHKDRISWGFPNGSFLEMYLQNAEEPKYHVLFSRAERHNDTEEERLVGRVKEGKHALIDWRSSLRFLMRKDFLLTGSCHFSLSMDEFLDEPIAMIIPYGSPYL

PVINAE

>AdorIR25a

MRFVELTIATCWFLGLCGKSVIYGQRTVASNRESAKTRPVNIFIINDETNKVANLSIITALETIKENYPNQLGNVWSVQVNESDINNTLDRVCNNWDSAVEKGGAKVPDLVID

TTTAGLGAKISNSFTAALGIPTLSAQYGQVGDLQYWRKLNTDQQNYLIQVMPPTDLIPEVIRQLSIQLNITNAAILYDYNFVMDHKYKSLLLNVPTRHVINETSQRIIEMKRQ

LLRLRDLDIVNYFILGNENTINIALEAADALNFTDKKYGWFLLTPDINIWPRCECRDISVLFMKPEFDGKNNSAVELSLPKPILLSAFYYDIIRLAVLAMKSALDDGEWPMEPRHITCDEYNNTNTPERKLNFFGKLKEAYKNITPTYAGIKWGSRNGEHQAKFVMSVHLVGIKDGVVSNTIDSGSWNASISSPLQLTNNDVMNTTAVKSYRVVTVIHPPFVMYN

EEKNEYYGFCIDLLNEIKKTVGFQYEIRETDDKKYGSLNLDGSWNGMMRELIEKRADIALGSLWVTAERERVVDFTVPYYDLVGLSIMMLKTKTTTSLFKFLTVLENEVWF

CILAAYLFTSVLLWIFDRWSPYSYQNNREKYKNDDEKREFNLRECFWFCMTSLTPQGGGEAPKNLSGRLVAATWWLFGFIIIASYTANLAAFLTVSRLEIPIETLEDLSKQYKI

QYAPVINSSAYIYFKRMANIEWKFYEIWKEMSLNDSLSDVERANLAVWDYPVSDKYTKMLQAMEEAGFPASTEEALRRVRRLDSNNEFAYIEDSTTIKYLTMTNCDLIQVG

EDFSRKPYAIAVQRGSPLKDQFNNAILILLNKRKLEKLKDKWWKKNPSKKDCDAENSQSDGISIHNIGGVFVVIFLGIIFACFTLAFEYWYYRHRTKITKIDRNNTMKNKITQ

VKPLRFNLQPAPTHAFQNVQFRPRF

>AconIR1

MRGDLLRLVLLLVWGIISCHLLSVSCTAHPNNNNNKTERAAKSRLKSSNSPWRLVISLSHSQSPSRTDVQRAWEEARIESIQNELEVSYVEGRMAPMSDSLSYPLAFMNKFC

TDIENGKTILSIVIGGGSAARFLMTAAASLNLPSLWLPMTHRDFLRQGKRGRYESRLGSDSEEAGAAAAAVMHKANWHAFTLLIDTTLLPLHHLLSKDHQHHHSLLPRATIH

LPASEKSLKLRLRRISEEGGSGGVIVMACDLNNARKILNVAGKYHMLHGRFLWLWLDLKAELRPNEPSLLSSHAIYNFLTSSNRLENNLPMAENTMKHIANLVLDDEAHTN

SLSNLVNDIHRLQDYHWQDKAPIKKRDDKSFTFDDDDEARPSDKILNSKTFMPVGMLALRPSSMKISGGDAILSRMLRETSQALDNTFLEYKSAINRLREAQIKDYFIPTCFF

SSDKNHPMLEIKTNISRTLTMKLRESMRQISHDKAEFQLLNLQAVQFPGNKTQLRWTKVGLIRGGKDVRLDTIMWPGGGIVPAYLEQGGEKVGMPQYRIVTALAPPFIMVT

NLQEGSCLRGLPCRKGQTVKCCYGLTIDLLSLVARELSFRFDLYVAHDGLFGKRNGSNGSWNGVVGELLHGRAQLAFAPISVSARRAEVIDFTTPYYFSGVSFLAAPKENAE

ISLLAFLLPFSPELWIAIFTSLNITAMAVAVYEWFSPFGLNPWGRQRSKNFSIASALWVMWGLLCGHLVAFKAPKSWPNKVLINVWGGFSVIFVASYTANIAALIASLFFHSAV

NNYSDRSLLSQKVGAPRASAAEYYVQKADRHLGAHIARFSVSDVGEGVKRLLNGSLDILIADTPILDYYRATDDGCRLQKIGDTITEDTYAVALTKGHPLKESISKVIANYTS

TGMLDILQEKWYGGLPCILGRDGREANLGSSSEGQPRPLGVASVAGVFCLLGMGVVLGAIILAGEHLFYKYTLPRLRHRPKTSIWRSRNVMFFSQKLYRFINCVELVSPHHA

ARELVHTVKQGHITSLFQKSVKRVCILYHGELVVVLL

>AconIR2

MEELSRWSNKYVVLDCPTDMAKEIVVSHVRDISLGRRTYHYLLSGLIMDDRWESEVIEFGAINITGFRIVDLNRRPVKDFLDSWRRLDPMTLPGAGRDSISAQAALMYDAV

AVLVEAFNKFVKKKIDRTNPKRPGTPSSSQPANVSDPLDCNTSKGWVTPWEHGDKISKFLRKTEIEGLTGQIRFNNDSRRHNYTLHVVEMTVNSAMVKVAEWTDEAGFQPI

AAKYIRLPTQEIERNKTYIVTTIVEEPYIMLKKPEPGKVLVGNDRFEGYCKDLADLIASDLGIKYEIKIVDDGKYGTENPDVPGGWDGMVGELIRKEADIAIASMTITSERER

VIDFSKPFMSLGISIMIKKPVKQKPGVFSFLNPLSKEIWVCVIFSYIGVSIVLFIVSRFSPYEWRVIKLNGGVDPAMTARGDPSLQHPHSQPGSLHAPNPCMANDFSILNSLWFS

LGAFMQQGCDISPRSMSGRIVGCVWWFFTLIIISSYTANLAAFLTVERMVTPINSAEDLASQTEVQYGTLHHGSTWDFFRKSQINLYSKMWEFMNSRKHVFVNTYDEGIRR

VRQSKGKYALLIESPKNDYVNEREPCDTMKVGRHLDVKGFGVATPIGSPLRSKINLSVLTLKEGGELEKLKNRWWYDRTECRHSDKQDSRNELSLSNVAGIFYILIGGLLLA

LAVALLEFCYKSHTEATRAKIPLSDAMKAKARLTIGGGRDFDNGRWYGLQS

>AconIR3

MIQCATFAVMLLTNYQVSSAYETPSPLAVQLIIEFSKWQSWKQVVIFDDLTEGGGHVMKYTRPLLRCFSEQGVGLSLQPTSAPRLPEALDICTHRLGAIVFLDRLNNTSADNV

LQLASSKRLFDYYISWLLITTRPDDVTIDTYLRNLTIGINSEVVVATASQFSSQQREQMRGFTNRTCRALRDYAHNHKYRNATVQSAVAMKNVTQNLAYSPTENSTACFRLV

HIYKIRISDNCSLVVDPLGSWNPGSMMLRHPVDVVLRDNFHRLPIVVGVLNGTSEDQDNDGVSLEDQTPDDRPFDDFINFVANGLNASLETVLHEKVGTITNKVWSNLLGD

VTNGNIDIGLGYITINDERLRDMCFSHPLIRYTRNIYIRPPESGTMRDIFLQPFNNRLLLGVAFVHVIIVVTIGTINYALRHVFNHSTARHYGYGEATLWCTSIMCMQGSPWNPCTLSGKLALLASLIFALVTYNAYAGFITSILSVQVPGIKTLEDLLQNNFKVGYSEYDDEFMRNANDSNLRQLYIKAFNGRESRLDTTLGLQRAINGRYGFFVSATSARRILKTTL

IQQRCYLKEIEVKQTFTTVALPMEKDSPYKKIINLSILRMRERGVIDRIVKKMLPDMPNCNDPTTFHSARIADVYSAFIIIAAGIVMSVSITLLERIWSQRNNLKNRLTKGVSHH

IKKNSQFPTHLTLQASENLIYNHGNSLRRRTQRPNMSLLPFQN

>AconIR4

MGQSVNKNNITSIKTETALMYDAVHLFAKALHVLDQSQQIDIKPLSCESSDTWSHGYSLINYMKIVDMHG

LTGLIKFDHQGFRSDFVLDIIELNSKDGLKKIGTWNSTEGVNFTRSFGDVYIQIVENLQNKTFIVTTILS

APYCMLKDSTMELKGNAQYEGYNVDLIHEISRILGFNYTFTIVPDKKYGSYNKVTKEWDGMIKELLDQRA

DLAIADLTITYDREQAVDFTMPFMNLGISILYRKPLKKPPNLFSFLSPLSLDVWIYMATAYLGVSVLLFL

LARFTPYEWFKCSYGKNCNHEQNRFKLSNCFWFTIGSLFRQGCDILPKFSPYEWENPHSCNAQSDDYENE

FTLLNSLWFTIGSLMQQGSDIAPKAVSTRMVAGTWWFFTLIMISSYTANLAAFLTVERMESPIESAEDLA

KQTKIKYGALAGGSTAAFFRDSNFSTYQRMWSFMQSAKPSVFTKNNGEGVEWVIKGKGSYAFLMESTSIE

YVIERNCELTRVGTELDSKGYGIAMPPNSPYRTAISSAILKLQEEGKLHILKTRWWKEKRGGGKCTEDNL

KGSSAANELGLANVGGVFVVLMGGMGVACVIAVCEFVWKSRKVAVEERKHKTSEKSICEGFTDLH

>AconIR5

MEVTDDPNRGYLIDNVRYEGYAFDLIEEISKDLDFEYDFEIVPDKQYGVYDPVTKQWTGLFGRLMRREADLAVCDLTITKFRLSLVDFTTPFMNLGIKILFAKPQNEVPDLFS

FLSPFSTDVWIYVATATLALSLSLFILARIAPTEWHSAHPCASDPEELENNFNLKNSLWLTLGSLMQQGSDILPVAPSIRMVTGMWWFFTLIMGSSYTANLAAFLTNVKMDAS

ISNIDELAAQSKIKYGAIRGGSTAQFFEGSNDSKYQKMWQTMLEARPEVFTTTNKEGVERVAKGKRTYAFLMESTSLEYAVERNCNLMPVGSLLDNKGYGIAVPPNSPYRTL

LSGAILKLQEKGTLRELQTKWWLKGSKNCTQGEPEPSSGELTMAHVGGVFLVLVLGCTGSFVIALCEFIWNVRKVAVEEKITPGEAFIAELKFTLNLWAETKPIKISRSSNAS

GSSASGGNGFTRAASAARSIVGSFLRLDTLGK

>AconIR6

MQFASEIAPWIDMSYPNWLIFFRNETKIQNFFSDIYVPFDCTFMVSTSEFEDQETILEVYQIERDKELRQGLFGTWDIENGIKLSTSSLYQRRNDLFGQTLRVVSVHDPPSSIV

MTDDKEIVNVGGFFGGIMELLKESMNCTITYQVADEFGNLLDNGSWTGAINQLVDKTSDIAAAELMMTADRLESVKFTTPLYSTKTRTFIKKPSSSTLKWDAYISPFSFGIWS

TMGIMIVLTSISISVIKSLTLILCSKIEENKEPSKILDISFAVFGAFCSQGMEMSMTDSVRIIHLVIHVTAVIILAAYSAALISALAVKTFIMPFTTMKGLLDDATYRFGVIGASADY

SFFQNSSDKIISDLSDNFLAKEVDLPINYLDGLMRVCSEDKYAFMALDNAVAQLKSSVDCVVVPLDTISQTSIAMALRKDSPFRGLINSKLFTVFCYYATVVCCRSY

>AconIR7

MTINYARESVIDFTKPFMNLGIGILFKVPSSQPTRLFSFMNPLAVEIWLYVLAAYMLVSFTLFVMARFSPYEWNNPHPCLAESDVVENQFSVSNSFWFITGTFLRQGSGLNPK

ASSTRIVGGIWWFFTLIIISSYTANLAAFLTVERMITPIESAADLAEQTEITYGTLEGGSTMTFFRDSKIGIYQKMWRFMEAKRSSVMVSSYEEGIKRVLEGNYAFLMESTMLD

YNVQRDCNLTQIGGLLDSKGYGIATPKGSPWRDKISLAILELQEKGVIQILYDKWWKNTGDVCNRDEKSKENKANALGVENIGGVFVVLLCGLALAILVAILEFCWNSKKN

AQSDRVSFSHLFLAY

>AconIR8

MTNTKLEPPFGDIGELFNSTKYRIVVYNGSMAFDRFKRFASHFRPEHQKRVIFDGSKTRMYHYACQNKNKIAVIESDDRRRATGRKICILVKAGAPLFRTWITSGVIKGFQNK

RSLDLGMIRLHEAGLIDGLKDRWMAPD

PIAWDGSNVESIRLNHIYMLFVILLFGAILSVIICVIENIIFLHQQNSTRRKKKRKRRHVRKFNQILI

>AconIR9

MENLTCATVKGSAVDMYFRRQVELSNMYRTMEANNYDTVEEAIRDVKIGKLMAFIWDSSRLEFEAAKDCELVTAGELFGRSGYGIGLQKGSPWADAVTLAILDFHESGFM

EVLDKNWILQRNLQTCEQYEKTPNTLGLENMAGVFILVGIGIVGGVGLIIIEMAYKKHQIKKQTKLELARHAAE

>AconIR10

MDIASAQKNESLYQCCSGFCIDLLQKFSEEIGFTYELVRVEDGKWGTMEQGKWNGLIADLVNRKTDMVLTSLMINSDRESVVDFTVPYMETGIAIVVAKRTGIISPTAFLEPF

DAASWMLVGIVAIHAATFMIFLFEWLSPAGFDMKKTPS

>AconIR11

MNPLAIEIWLYVFAAYVLVSVTMFVVARFSPYEWNNPHPCHSGPTEIVENQFSLANSFWFTIGTLMQQGS

DLNPKAASTRIVGGIWWFFTLIIISSYTANLAAFLTVERM

>AconIR8a

MQASSWPLHTLIFVMILRAVQPQTTVKMMILIEMGENNILEIISDALAMAERSLSGDQSVKIDIVPVVVDRDSVDESYNHVCSELFSGVTLILDMTYTGWDRVYEIARNHSI

MHVRSAAKITPYIQASNDLLMRKSATDVALIFQSEKELNQSLYRLIGESTIRLVVIDELSDITVTRIRAMRPSPSYYMIYASTDSMEGLFNAALRGNLVSRNDTWYLVFTDMN

YRNFRYFQADVLDVNIGVLSMNSVVCCRLLRLDTSCTCPTDTQIYEKFIERMIFAILEALDRLQKSNTDLEPRKFSCSSPNENIPTPEENESSTSFYKILVEILTSNNALEFISESS

EGPYHMPMIIYEPIINIEILKNGNLEDLATWRRDGIQTAPGKEILPVKHFFRIGTATALPWSMIKTDSTGAPMRDEKGNLMWEGYCIDFIQKLAEKMKFDYEIVNPKDNLFGE

KLENGKWNGLIGDLTSGETDMAIGALTMTSEREEVIDFVAPYFEQSGILIVLRKPVRKSSLFKFMTVLRLEVWLSIVGALTLTAIMIWVLDKYSPYSARNNKKIYPYPCREFT

LKESFWFALTSFTPQGGGEAPKALSSRTLVAAYWLFVVLMLATFTANLAAFLTVERMQAQVQSLEQLARQSRINYTVVNMSSSHQYFVNMRSAEDKIYKMWKEITLNSSSD

QVEYRVWDYPIKEQYGHILQTMLTVGLVNDTQEGFRKVEENENSEFAFIHDSAEIKYEVTKNCNLTEIGEVFAEQPYAVAVQQGSHLQEEISRTILELQKDRYFEGLTAKWW

NSSMKCSTADDNEGITLESLGGVFIATLFGLALAMVTLAGEVIYYRRRNAIQSEKAKDTSQEKVSSGPKIMTRINSKSKLRQLKPSPPVSFIGRHRGLRPRISHISVYPKTFPFK

E

>AconIR75u

MKNFAKLIFICLVISSEAHKIDQTIGEFIIDVTSSMYMRSSFTAFFCIDTTDAIIFSRQISRRQVMHEIIHDLKNINLTNLLTKISSQSFFILDFDCPNVEEFLLQMDLNEMFIAPNK

WLILQNLENFPDKNLTLTINTEDFKRYFEALQVYPDSEVTVGQRIDENFINIISMYRPGPSGNIILEDRGFWSDLEGLQISDKNPTSRRRQDLQGTHLKSCLVMTDLDTLNHLS

DYKDKQIDAVTKANYIWVQHLVNRMNATIDFTWRNTWGYQDKNGTWGGMIGLLDRGEIDIGGTATFLISSRIGVVDYVQLYTPVGSRFVFRRPPLSYVTNLFTLPFEQSVW

IAIGILLIVVSILLSLTMRWEWARIMESPSKYHLGGELESKPTASDNFLILLGAVAQQGFEYLPRTISSRIIIIMLLIAAFSLYASYTANIVALLQSTSDSINTIEDLMNSGLKVATYDI

VYNRYYFGSFEDPVRKEFSQKLIANKSSAWLTLEEGVARLRQGLFAFHMDTSAGYDLVQKTFEEDEKCGLSEIDMLNVLNPMLVIKHQSPYSEIIRVGALWVQETGLTGHDVPRLFSKMPKCSGQTSFVNVGMTECRAAMLTIVYGMIASVGLFFMEILWHKCSRNDEIDEEVMEASEESPDPEIQSLE

>AconIR64a

MEARAMISYHQISDKIDLKSILHVDYYHIGVLLDYDCEKSMSFLDQFSRLLVFNESYHWLMLTESSAPPVDVLRDLPLSVDTEMTVAMRNNDSFQLLDVYNPSHRHGGRV

NITYKGQWTPQGGLRNQLTQFKYRRRQNFNLLPLNFSIVLLYPPKPDFHTYLTEPINPHLDSMTRYHYALVMQLKDFFNFSMNLQQAKTWGYLVNGTFNGILGDMVKGIV

DVSIAPFQYKEERMDVCEFTVETWTVRPMFIFRHPRTSDVRNGFLKPFAKEIWWFVLLGGLIYWIFLYGTAKIGIYFSKSDAENTLMSIPASETGLITLAAVSQQGLSEGPTNIS

GRIVFLSLFLWALLLFQFYSASIVGSLLSPPPRWITTLKNLSDSSLDCAMEDVAYSYDYYATTTNPMSLEFYDSKIKPTKKNPKGSYLKAAEGLNRMRKGAFAFHLDTATGYR

IIQDTFSEDEICELQEVELLTPRVTTLVTAKHSPFKKMIIYGLRKIVEHGITNRLRKVWHHSRPKCPESHSSKPQPVPMGEFSPALFLLLMGLAFSVFVMLAEYLHYYYNRPVD

KEDSTPEISSRKSSENFFNDELPNYNSNSA

>AconIR75a

MLIYCLDDIHLIKSFSNIGIYANVFQVEYYKPLDQTWTATLRSMGIWLDIRCIPEENITSILTEAGTSKMFGKLYSWLLVGNDFNQTLSYLDEYEMGLLNDIVIAVEREIKFDM

YDVYNPAKNRGGELNITRFGTWDAKTGLNVELTQSLFARRYDLHGIEVLVSIVTVYCDGQDLHHCLTTYDVLGVDLLSKFGYAMLVTISEIYNFRITVTANREFWGKFPNGS

LFGMMPSVQRGEYDFAGSPVNSNWIRMGYTNLFPVWTSRIFIIFRDPSKSFKFTELFDPLAGESWMGVMSLLALIAFLLTWILWFEEGGFWYQQFGWSFFITIGALCQQGLL

AVSNRISGRIVLLFLMVFIFLIVNYYSGKIITARIHIKPPRLNDSLYELVKLTARNYRFCNYPYKPLGNYVQTTKDKDILFFFKYVWSKVPLPNQMPIVVGLERVRKGKFAFVIN

EGDSYPYINNNFEPEIICELNEIHILKPHPFLLFEKPHSPFREIALVGQLKMMSTGVKSRNVHRWTPTPYKCDPQIRSNEPLNIRDVISALLILGSGMTLSVFILILEILNAKLSEL

KNTRIIYLKNMKKKPRKS

>AconIR25a

MMYDKETGEWSGYCIDLMKEIQEILGFEYEIYVAPDNEFGNMAPDGTWNGMIKELMDKRADIALGTLSVMAERENVVDFTVPYYDLVGISILMLKAKQPTSLFKFLTVLE

DDVWLCILGSYFFTSLLMWIFDRWSPYSYQNNKEKYKDDEEKREFDLKECLWFCMTSLTPQGGGEAPKNLSGRLVAATWWLFGFIIIASYTANLAAFLTVSRLETPIESLDD

LSKQYKIQYAPVKPSEAYTYFERMANIETKFYEIWKDMSLNDSLSDIERAQLAVWDYPVSDRYTKMFEAMKESGFPTSRDEAVARVRKQLQNHSATDFAFIGDATAIRYLEM

TTCDLIMVGDEFSRKPYAIAVQQGSPLKDQFNNAILQLLNKRKLESLKNKWWNQNPKRRFCKKEDDQSDGISIANIGGVFIVIFVGIFLACGTLAFEYWWFRYRPQQEAKRL

AAQGNQNIKPMRFHLKPARPAFQPGSEFRSRF

>AconIR21a

MRTSMIASILCRLACLNIVQASQKAPAAAVHDAVARTDSLSTLLHYILANNCHGCAVIIIHDGSLYDQHSGLLSGLCKDSPAVSFLQQYVDVLQNKAPRITLSDKCFHYLIFVQ

NIYNLNKIIPKETVNKVIVVAESTSWTIQEYLKTISSRSYTNLLVITHSLSRRTEQGSYLLYTHELYTDGSGSSLPVLLTSWIKNHTSKQDINLFPEKLRGGFKGHRLLISTANQP

PFAIRKNIISQQRSVWDGIDIRMIRLLGATLNFTADFRDAIATNSSIYAVMEDVLNEQVSAAVGGIYRTDDVIIKFDNTVSHMEDCAAFISLSSLALPKYRAVMGPFQPGVWVL

VCLVYFIAIIPLCMNTNYTLWSLIIHPSRFLDMFWFVFSTFTNSFVVKNPLLDTGLAKNSTSLLIGIYWVFTIIITSCYTGSIMAFITVPAFPAAINSAEQLLEEGYDIGTLGEISSS

FCNLIFFFFTL

>AconIR93a

MGKSLPIATYHNPPWQYEMSQTQSDEKQAGSMTSKWDGLIFDVVEELANRLNFSFKPVVVEAPPEIIIAKADPLRASMSASEKVPDAVTELVRSGSVFLAACAYTISTHGKDPSINLTQAISLQTYGLLAPRPKPLSRALLFASPFSNEAWACLASAIILVGPVLYAVHTLSSRTTDTELKDPGSVLLGLDSPSRCIWYIYGALLQQGGMNLPKNDGARLIVGTWW

LVVMVVVATYSGSLVAFLTFPRMEMAVKTVDDLLARKSEFTWSIPAGSFLEDYLLVSSAEGTIDYRNLLQEHEPHAEKHGTTTYLQNVQKVKRGKHALIDWVTSLMISTRN

EYVASGSCHFSLGTDVLILGEPISMIVPAGSPYLALINVQLQRMQEAGLLNKWTADRIPVKDQCSEGGIIARETDNHKVNLEDMQGIFFILLLGYFIGTLTLGWEFIRRRLKIA

KEAKLIRPFID

>AconIR64b

MNLMKGSTWGYLINGTFNGILGDMIKGIVDFGATPFQYKPERLDVCEYTVQTWLARPCFIFRHPKKDDLSNPFLKPFEQRVWYWIALFGFVNWALLYLTAKIEKIINWKPLI

NTLDSHPASETALITSAAICQQGLSDGPRLFSGRIVFLSLFLWGFLLYQFYSASVVGSLLAKKPRWINTLKDLADSNLEIGIEDIAYNYDFFATTTDPVAQRLYNEKVAVNKKR

KKLPYYSAEEGIARMKNGGFAFHVDVATAYKIIEETFTAAEICDLVEIQLFPPKHTATATARYSPFKKMVTYGMRQIVERGMARRLRHIWMHRRPQCPESHSEEPVPVILAEFS

PALFLLTCGCCFSTIVMITEMIVQRKHRLEPENHLTGVFTQKSPSALSESSRKFEDISSPIDPDEVKFSAN

>BimpIR25a

MRLVGFTIAMYGFLGFCSESAVYAQRNVVGNRGSTKTRAVNLYLINDEANKVANSSIIAALETINEKYPNYLGEVWSVQVNESDVNDTLDRICKPWDSAVKKGGTGVPDLV

IDTTTAGLGAKISNSFTAALGIPTLSAQYGQEGDLLYWRNLNTDQESYLIQVMPPTDLIPEVIRQLCIQLNITNAAILYDRNFVMDHKYKSLLLNVPTRHVINEASQQIMEMRT

QLPRLRDLDIVNYFILGDENTINIALEAAEALNFTGKKYGWFLLTPELNVWPRCECKNMNILFMKPEFNKKSPIESSLSNPVISSAFYYDLIQLGVRAMKSALDDGEWPVEP

KHITCDEYDKTNTPERKVNFFNRLKESYKNMTPTYAGIKWGSKNGEHRAKFEMSIHLVDIKDGIVSNTIDSGSWNASISAPLQITNNEVMNTTAVKSYRVVTIIHPPFVMYNE

ENGTYYGFCIDLLDEIKDTVGFQYEIRETEDRRYGSLNPNGSWNGMMKELIDKRADIALGSVWVTAERERVVDFTVPYYDLVGLSIMMLKTKTTSSLFKFLTVLENEVWFC

ILAAYLFTSVLLWIFDRWSPYSYQNNREKYKNDDEKREFNLRECFWFCMTSLTPQGGGEAPKNLSGRLVAATWWLFGFIIIASYTANLAAFLTVSRLEIPIETLEDLSKQYKIQ

YAPVINSSAYIYFKRMAAIEWKFYDIWKEMSLNDSLSDVERANLAVWDYPVSDKYTKMLQAMEEAGFPASTEEALRRVRRLDSNNEFAYIEDSTTIKYLTMTNCDLVQVGE

DFSRKPYAIAVQQGSPLKDQFNNAILILLNKRKLEKLKDTWWKKNPDRKDCDAENSQSDGISIQNIGGVFVVIFLGIIFACFTLAFEYWYYRHRTKITKINLNSTTKGKVTQV

KPLRFNLQPAPTHGFQNSQLRPRF

>BimpIR21a

MILVTLFLQIILVSGKSVFYKEHQCVNSGNNLKSVVEEIVEEIIDQRNCIVFVSDSVYRNLVDVKNIKGSSTVLKYEIALRDNEQFLQPRRQVQRILIDGKAVNCSAYIILIANGF

MAAEFLQYTERERLINTRGLFLLLYDSRLFRSHLHYLWNRIINVVFIRQYNAYKYRSGEKASKERIDLDTVYFPLRKRKSIVTKYIDTWYKGKLLYGTNHFTEKITNLQEKHL

QIAVFEHIPAVTTKSRAYYNKQPNNNTEGLGIEFELMQIISKAMNFKPKYYMPDNITLEKWGINEDNQTHVGLVGEAIQGKAAFYLGDLHYTLHHLNYFDLTTPYNTECLTF

LTPESLTKNSWKLLILPFKFYTWIALVLTLILGGVVFYFLSISYKKHISLYKNQMHFQNTSMKKEIKGLYLFTEIGNSILYTYGMLFQISLPSLPSSWAVRVLIGWWWIYSILVAV

AYRASMTATLANPVARVTIDTLGQLAKSSIEVGGWNKENKNFFSMSSDLSSQEIGNKFKLIQEEDKAIEKVANGSFAYYENSYLLRHVRVKRQILEKEQKENITTVDISSKHN

LHIMEECVINMPIALGLEKNSPLKPRVDTLIRRIIEIGLVEKWLSDVMEWSKIMEIRQETESEKALVDLHKLQGAFIAIIVGYVLAFMVLIGEILYWKHIVLKDPKFDKYHLDIF

YSINNPKI

>BimpIR93a

MISVLLLLWCVNYGDSYNNFPSLITTNATMAVIIDKSFFDNNGEHRNVMGVVHDLIINTVKKEMHIGGIVVRIFRDADVNLWQGYTILLSVASCCITWRLHEVARKEELIHLAITDPDCPRIPETDGMSMPVVVPGEELSQIFLDLRMMNILPWNVINILHDDTFGRDTISRVMTAISDKLPNKQVNLISRSIFTLKHETTRSERKSSVKKTLNDFHVEQLGHCFLVI

ATVDMIADVMGVARSLKMVHPGSQWLYVITDSATKNMTNMTAFVDLLAEGGNVAFMYNATNLSNYCEIKLICYVEKLIQALAKALEYSLTNEIDLFKSMEEEKFEMIRLTK

RERRAELLKNIRIHLSQNAFASEGFCGRCLLWRFSSSITWGNFFSRGRNMAHLLDIGTWSPGFGVNLTDVIFPHIAHGFRGTNLPIATYHNPPWQIISVSKTGQKLYEGLVFDA

INYLGSKLNFSYTAITPEDLYTHSVLCPSSSSSAKRFCSXKIKEMTMSATRKVPKEVIDLVRDREVLLGACAITVNENKKDAINFTVPIFVQTYSFLTSRPKQLSRALLFASPFT

KETWACLAVSIIVMGPILYLVHKYSPYSIKTSGLKSSFQCVWYVYGALLQQGGMYLPHCDSARILIGVWWLIVMVVVATYSGSLVAFLTFPRMDASILTVDDLLARKDGITW

SFPNGSFLEMYLQETDEPKYHTLLSRAESHNDTEEEKLVERVKDGKHALIDWRSSLRFLMRKDLLLTGVCHFSLSMDEFLDEPIAMIIPHDSPYLPVINAELHRMLESGMMN

KWITERMPIKDKCWEVPGSNQAVNKRKVNVTDMQGIFFVLFMGIILAFFFLFCECYCHRRKISKERKLIHPFVS

>IkuwIR8a

MDKKADLAVGSMTINYARESVIDFTKPFMNLGISILFKVPTSHPARLFSFMNPLAIEIWLYVLAAYVLVSVTMFVVARFSPYEWNNPHPCHSGPEIVENQFSLANSF

>IkuwIR75c

MTEYGEGWFAESGHAIFATLGVFCQQGLVFVPNRLAGRIACLFLLLMGVLLSNYYGASVVSARLNEPPDKMNDSLYSLAKSHMTLASEEFRNVDDIIQFRSTGSRS

>IkuwIR75b

MTEYDEGYFAETGHAIFATIGALCQQGLVFVPNRIAGRMAFLFLLILGVLLSNYYGASIVSSRLSEPPNKMNDSLYALSKSHMTLTSEPYRYIDLNLAFRAQSEWEALYFYEKI

WNKLPMTKYVSTEEGLSKVSKGGYAFHTSAEVAYPYIEANWDDKMICAMTEVHIITPRILSFWERVDSPFTELMRVGLVRTANAGLRTRTIKRWKPKTPYCSPDTLSLESISI

FDIAPALLVVIGGTATAVIIYFFEVLMFKMSLGIPLLFKLRNN

>IkuwIR21a

MYTYGMLLQVSLPRIPEAWAVRVFIGWWWLYSILVTVAYRASMTATLANPISRVTIDTIADLVKSRLPVGGWTDEQRDLFLSSSDVDIRKIGERFELTTNEEEAIARVANGSFC

YYENIYILRQARAIRRQLEFNQMRIAERHNEIFKVDRDLHVMQDCLIDMPIAIGMDKNSPLKPQVDRTIRRVVEAGFVAKWLSDVTEWTKIVELRFRMPPEQTLVNLHKLH

GALVALAIGYFCSFVALAAEKLHWKYIVERNPLYDKYQMDIFYAKAQMD

>IkuwIR75u

MSRYNVMHNLWKSIERLDPLTLTSRINNQNFFVLDLECPGALDILIKASENRMFVAPAQWLILQDLRTPSKKTGNSSRDLGSLTSVDDVSWLYATFGNLTMYPDSQIILGRRLS

EDFFSILSPYRPSPQRDLILEDRGNWTLKDDLVLVNRDPASRRRQDLRRTELTSCLVLTNQDTLNHLEDYRDKHSDAVTKANYPWVLHLVNRMNATVKFRSENTWGYRAK

NGSWSGMIGLLDRREIDLGGTATFLIPERLGVVEYIQLYTPTASRFLFRRPPLSYVSNLFTLPFGRNVWIAIGVFLVLVIGLLYLAMKWEYKMKSLEKGSPKVHWSANIDDEP

SLSNNLLVIMGAVSQQGSSYEPRAVPTRIIVLMLLLATLSLYASYTANIVALLQSTATSINTPMDLM

>IkuwIR75a

MKLNVVTVVKYYPAGTDLREYLEDYKTKSLDPISKYGWGIASLIADLYNYTMHIDPVEEWLTEVNGTEQGMMAKLDRAESDFGISPSSAILRYAAKPYAHMLTPGYPYRSF

FIFRSNEVETLKWMELMTPFAFGSWYAIVLTAVFSIMIITTIQVTEYQEGWFPEIGHAIFATLGVLCQQGLTFVPNRIAGRIAFLFLLFFGVLLSNYYGASVVSARLNEPQDKMN

DSLYSLAKSHMTVTSEPFRYIDFNLVYRATWEWEVRYFLDNVWLKQPETKWVKPEEGLKNVALGGYAYHTSPEVAYPYVEANWDDKAICDMTEVHVVDPRILVFWERVD

SPFTELTKIGLIQTAITGLRQRTIKRWKPKTPYCSPDARSLESITIFDIAPAVMIVIIGNVLAGTICFFECVMYRLHPNDTAGQTKKKKPRLGGKKALIRIKKNNEMNLQ

>IkuwIR64a

MKIYIIFLIFLVVNTPCRSDKIRASFTKDYYKDRNIQHIVTFDCWDPYDKLSFARDVMEMDTRMSFITIMDNLEMKKILAVNYYHIGVILDIDCPRSAIVFDQFSQHRLPFNES

YHWLVFTESMTIPTEMLRHIPFTVESEMTLASRRQDSYVLHDVYNPSYRHNGQLNITWKGTWTPRDRLDDELTQYKYVRRGNFHGLTLNFSIVLTNPALPDFNTYLTTPINR

HLDTMIRYHYALVLQLRDTYNFTINMQRAKTWGYLVNGTWNGMLADMMAGLVDISVPPFQYKEERMDVCEFTVETYTVRPCFIFRHPKKNDLRNPFLKPFTSDVWYVIA

VVGIIYWLLLFLTARVEKHYRTEVPINTLDTHPASETGLITVAAITQQGLSDGPRVISGRIVFISLFLWGLLLYQFYSASVVGSLLAEPPRFITTAKDLMDSNIDVYFEDIGYYYD

YFRTIKDPFVLAFYDKKVKPTKKRPKGSYTDAVHGLSLVKKGGYALHVDTATAYKIITDTFTDDEICDLQEIEILKPKKVTLVTSKKSPFKKMVIYGLRRIVEHGLTHGLRQV

WVA

>IkuwIR25a

MAQRLNYTGHKYGWYAFTQDDFDPQCECTNLSLLFFKPKISVTSQQRLGDLTNGGLLPKPVLTSAFYYDLARLGILAMRKAIQDSIWPGEPKHMMCDSYNGNNTPTRDFD

FLKLLKTASSDVSFQATFAGFAWGKKNGEHRASFDMSINMITISGGNPVSSQELGSWPAGIDTELEVSTNDSVIRNHTAVTSYRIVTVVKPPFIMYDAETDKYSGYCIDLIENI

REILHFDYDIVQAPDKKFGTMDQNGNWNGMIRELKEKRADIALGALSVMAERENVVDFTVPYYDLVGISILMQKPKTEPSLFKFLTVLENDVWLCILASYFFTSFLMWIFD

RWSPYSYQNNREKYKDDDEKREFSLKECLWFCMTSLTPQGGGEAPKNLSGRLVAATWWLFGFIIIASYTANLAAFLTVSRLETPVESLDDLSKQYKVQYAPMLNSEAYTYF

ERMSDIETRFYEIWKDMSLNDSLTDVERAKLAVWDYPVSDKYTKMFQAMKEATFPVDMAEALRRVRRQDPNITNDFAFVGDATDIKYLSMTNCDLIMVGDEFSRKPYAIA

VQQGSPLKDQFNNAILQLLNRRILEKLKNKWWTHNENKKTCKEEDNQSEGISIQNIGGVFIVIFVGIGLACITLAFEYWWYRYRPNHNANINHNNANPKAVPVRNAKPVRF

TLKPARTPAFQSSGQFRSRF

>IkuwIR8

MVWAGFAMIIVASYTANLAAFLVLERPKTKLTGINDARLRNTMENLTCATVKGSAVDMYFRRQVELSNMYRTMEANNYDTAEDAIQDVKIGKLMAFIWDSSRLEFEAAQD

CELVTAGELFGRSGYGIGLQKGSPWADAVTLAILDFHESGIMEGLDNHWILQHNLPQCEQFEKTPNTLGLKNM

>IkuwIR7

MRIAYFSIFVSALVVSAAYSASLISFLTLSSPSLPFSDLLGFAKDGSYKLIVYQQSSQYDFISSSNDSVFVRMMTLMKPLQDLPRNTNEGWTQVCEERVALYTSTVEKITMDGI

TCNVIGIDTGHVESLAMALPAGSQYTDVVNYHIERFKTNGIFKRLKALYYDTEVPAATTYDVVELSGVTP

>IkuwIR6

MFTLFSGEIWSLIGAIIIILSLASLAMERILVRHGGRQLRSRSYAEHFFYVSSTLFNQVNAVDSIASGSKILSLTISVFCWLILIGYSSHLIYSMTEETLDAPFDNLDTLFESTNFHI

AVLHGSVAHSCFTSAYTYEIFKRIWKKNRVKVVSNVEALYRQVCSNPHKYVLLDAVDTMSVRKNTECSLIPVGEAYFAVPVASGISRRLKSKRSLDIGIMKLHEYGIIDALKK

RYMSRPNRASNLRLTDDLAIDMDRVSMIFGILCFGICASIVVCLAENMHFTFKKRDSTIESLIKRLPIINRIIKTKIR

>IkuwIR5

MPNGSYDGLVGMLLRDEIDIIPRTGYYVSESKVMAYTTPVWDNRYRTYIRPQFKVDSTWMFNMFASEVWYSIFCLLILISALGYTAQRISIKVSNDQRSPHNLHDHVFWTFA

TLCCQGFIPDSLYQRVKILALTKKMMAWLVLIVLSSHLISYMTNRKALLPFEDLGTLFNSSSYNIVIFKGSMIYDKFQRNVMRTTTRAIIDERVRPVATPERLYEKGCWGKRN

YAIMESEDRQRAYGRFMCKLVPVGIPYFATWVAAGVAKTFKYKRTIDIGILKLNEFGLTDGMKDRYMESATVTYDSSPFTSVNFDQVLMLFMILCMGMIA

>IkuwIR4

MHDCASFISLASTALPKYRAVMGPFQLSVWLLLCSVYMIAMIPLSMNSHYSLKSLLTKPSSLNSMFWFVFSTFTNSFSVKNPLLNSGLGKNSTSILIGIYWVFTIIITSCYTGSI

MAFITVPVYPTAMETADQLLRNRYRIGTLDHDGWNTWFNSTTMDDPLAIKLLKNVEYVPSVKEGVKNASHAYFWPYAFLGSRILLEYIVQAEFAPNWSTKRSLMHISTECF

VEYGVTIVMPMESIYTEAFGKVVIRARQSGLTQKIVKDVEWNGQRSASGKLLSVASGSKIQRVSVEERQLTVDDTQGMFLILGAGTLIGFFVLSIECCVHSIKKRWHSKVAN

EENNNFADGSYERNLDFWLSDNNVDSVGRRYSTTSI

>IkuwIR3

MTSSACIFPIFPAFFFTLFTFMIVPFVNAQTPVKLLFVVESTDTSIKGLLNDFLPTTEKEFGGGNINLDAAIVEVDRDNIEGSHQKVCAALYDGVTLILDMTWTGWDKLRKLA

TDNSIIYKRTDSTIIPYVQAVDDLLAKKNATDVALIFENERDLNQSLYYLIGNSIIRLVVIDELTETTVAKVRAMRPSPSYYAIYANTSKMETLFKTALDGGLVKRNGIWNLVFT

DNNYKNFKYISGNGNLNVTLGVLSMRTDVCCRMIDEMPCNCPTDFQIFPHYFKRLLGLLVGTIAEVIKSGVSVETKSAQCDAKNSTSGLSNATIDAFNANLVTTITAQNDVF

ETTSDMIYYKAEIELETLQDGNLEKLGNWSRRTGIQVAEGKEILPAKRYFRVGTTEAIPWTSIKRDSEGRPMKDAEGNEIWEGYCIDFIQKLSEEMNFEYDLVIPTDRSFGNK

LPNGKWTGLVGDLARGETDIALAALTMTSEREEVIDFVAPYFAQSGILIGSINKLV

>IkuwIR2

MSYPTWLIFFRDETRIEDFFMEIYVPFDCTFMVAQGEGNDSNTEIITEVYQIDRDQELRHSTFGTWHPKHGITTPTVALYQRRNDLYGKILRVASIHDPPGSLIVRDENGQMIG

LGGFFGGIMQLLEESMNCTVIYHESFNWGQFLDNGTWTGAIGLLTRNDVDIVAAELMMTRDRLEAVDFTTPLYSTKCRTFIKRPSVSALKWDAYITPFHSGIWSSIGILIIVTS

ATISMVKTITPIISASMQDVEKSPSNLVDIILAVYGAFCCQGMEQSLLDPIRMVHQVIHLTGVVVLAAYSAALISSLATKTFVMPFKTMEGLLQDGTYRFGVIGESADYSFFQN

TSDEILQVLFAEVLTKEKDLPNNYLDGLNRVCEEDKYAFMTLDTVVSQLNPKVNCKLEPLDTIMQASVAMAVRPRSPFRGIINTNILLIRDSGILQRLLHSEWALDDDRVNG

WTTVEIGDILPLVLVILGGIFFSLITLGSERVIAKQKHRKSNKKTKEAIVQPMISFRKHKKASSDLFKH

>IkuwIR1

MSLTEMLIVIDNDVLESSMLFNVSKYQTAKAKIATRNGLWTLTDIFLEPRVFKKFSSHDEIIHKKGIANLGGRKLQAAAFYQPPFCYLKSTVNQTVGGIEGEFFIAKKGIKEFE

LDGVEFKLFMLIAERLNFTWMIRKPNHFFRYGRRIGSTWYGGMIGQIYRKEVDIAFTNIWLTQDYYLFSNLTYPWTQISINFLVPRPKPHRGFWALMKPLTPIVWATILVMVI

AQSICIYATAWLRKKVPKRFRNFVATFTELVGRLLGVSSPTRTQGLKLQLQLWHFIGILLVTAYSSNLEARLASEGYEKRIDTLQDFIAANLTWGRQAPAPVFSRYFDESDLYG

KQLVDHFEIESNDSERHKKILKGHYAIIGRIIGKMFFPENTIEEEDFKGYRVMKESTGKFYTTFAVQPWLLEPVNKITLRLREAGLAQYHLRDVIHRRTGRELRQVMIEQDIGS

GAPRVLKLTPLGAGFAILIFGLTFSTIVFYLELKHASRKTFIPKVLHRMKKKSQRLASLKDYTKVNIRR

>AmelIR21a

MLLVTLFLQFIVLASSKRVLYKLHQCENNEANLKSLAEEIVEEIIEQTNCIIFITDSTYQNLIDIKNIKGSSNVSKYEILLRDNEQFSRPRRRIQRILVDGRTVDCNAYIMLISNGY

LTAEFLQYTERERLINTRGLFLLLYDLRLFQLNLYYLWKKIINVVFIRQYNAYKHRSGEISFKERIDLNTVYFPPRKRRLTATKYIDTWYQGKLRYGTNHFTEKTNNLQKKHL

QIAVFEHIPAVTEKSKLYYNKQPNNIIQGLGIEFELIQIISKAMNFKPKYYIQQNIPLKQKDIEGSNQTDTGLISKVIEENAAFYLGDLHYTLQNLNYLDLTIPYNIECLTFLTPESL

TENSWKLLILPFKFYTWIALILTLILGSIVFYFLSLSYKKHISSYKSQNTSIKNETKGLYLFTEIGNSILYTYSMLFQVSLPHLPSPWAVRILIGWWWIYSILVAVAYRASMTATLA

NPVARVTIDTLAQLAKSSMEVGGLNEESKNFFLKSSDLSSQEIGNKFIIIKHEDEAIEKVANGSFCYYENSYFLQYARVKRQIFEKEKKRNETANNRSSKHNLHIMEECIINMPIALGMEKNSPLKPKVDILIRRMIEIGLVKKWLNDVMEWPKIMEIRQEAESEKALVNLHKLKGAFFAIIFGYLLAFMILIGEILYWKYIVLKDPKFDKYHLDIFYNSNNNSKI

>AmelIR25a

MRFVEFTIATCWLLGLCGRFVIIYGQRSVASNRESGKTRSVNIFIINDEANKVANQSITTALETIKENYPNHLGNVWSVQVNESDINNTLDRVCNNWDSAVEKGGAEVPDLVI

DTTTAGLAAKISNSFTAALGIPTLSAQYGQVGDLQYWRKLSLDQQDYLIQVMPPTDLIPEVIRQLSIQLNITNAAILYDYNFVMDHKYKSLLLNVPTRHVINETSQQIIEMKR

QLLRLRDLDIVNYFILGNENTISIALEAADALNFTDKKYGWFLLTPDINIWPRCECRDISVLFMKPEFDRRNNSDSVEFSLPKPILLSAFYYDMIRLAVLAMKSALDDGEWPM

EPRHITCDEYNNTNTPERKLNFFGKLKDAYKNMTPTYAGIKWGSRNGEHQAKFVMSVHLVTIKDGVVSNTVDSGSWNASISSPLQLTNNDVMNTTAVKSYRVVTVIHPPFV

MYNEEKNEYYGFCIDLLNEIKKTVGFQYEIRETDDKKYGSLNLDGSWDGMMRELIEKRADIALGSLWVTAERERVVDFTVPYYDLVGLSIMMLKTKTTTSLFKFLTVLENE

VWFCILAAYLFTSVLLWIFDRWSPYSYQNNREKYKNDDEKREFNLRECFWFCMTSLTPQGGGEAPKNLSGRLVAATWWLFGFIIIASYTANLAAFLTVSRLEIPIETLEDLSK

QYKIQYAPVINSSAYIYFKRMANIEWKFYEIWKEMSLNDSLSDVERANLAVWDYPVSDKYTKMLQAMEEAGFPASTEEALRRVRRLDSNNEFAYIEDSTTIKYLTMTNCDLI

QVGEDFSRKPYAIAVQRGSPLKDQFNNAILILLNKRKLEKLKDKWWKKNPNKKDCDAENSQSDGISIHNIGGVFVVIFLGIIFACFTLAFEYWYYRHRTKITKIDRNNAMKN

KITQVKPLRFNLQPAPTHAFQSVHFRPRF

>AmelIR93a

MHYSQVSSVIYCANNTRGYFSLSIEMISVLLLVWWINYGSSYNNFPSLITSNATMAVIIDKGFFSNKDEYQNATKVIQDLITDAVKKEMNLGSISIRVFRDMNVNFKDYTILLS

VATCYLTWRLHEVAQKEELTHFAITDPDCPRIPDTDGITVPSIVPGEELSQIFLDLRMTDILSWNVINILHDDTFGDKATSSNDNVTILLSNANTCSRLVSDRDTISRVLKAISNK

LPNKRMNLISRSIFSLRYGNTGSGRKSSVKKMLNDFHVEQLGHCFLVIATVDMVADVMSVANSLNMVHPGSQWLYVITNSVSGNLINTSFINLLAEGGNVAFMYNATNLDG

FYKIKLKCYIKDLIEALAKALEYSLKNEIELFKRMNEDEFEMIRLTKSKKRAELLKNVRIHLSRNTSASNSVCEQCLLWRFFSSITWGNFFSHDRNMAHLLDIGTWTPIIGVNL

TDVIFPHIVHGFRGINLPIATYHNPPWQIISMSKTGKKLYEGLIFDAINYLSMKLNFTYTVIMPETSQISRSWNTSQFAKLGEKIKEMTMSTTKKVPLEIIDLVRQKKVLLAACA

LTVNECGNTTFNYTVPIFVQTYSFLTAKPSQLSRVLLFASPFTKETWACLAVSIIIMGPILYLIHKYSPYSTKASGLNSSWQCVWYVYGALLQQGGMYLPQNDSARILIGMWW

LVVMVLVATYSGSLVAFLTFPRMDTSILSVEDLIAHKDSISWGFPNGSFLEMYLQNAEEPKYHVLFSRAERHNDTEEERLVERVKEGKHALIDWRSSLRFLMRKDFLLTGSCH

FSLSMDEFLDEPIAMIIPYGSPYLSVINAELHRMLESGLMNKWITEKMPMKDKCWEAPGSNQMVNKRKVNVTDMQGIFFVLFIGITLAFFFLFCEFYCHRRKIAKERKLIHP

FVS

>AmelIR75a

MYVQNIFYLQLIVASYASNIDIIRDYFIFKNVPRVAGFSCGNIENDYQILKLLNEVGIGVSITQFTSIINIPQFLHTTYWNLGIFVDLECLVSDENIVKLFYETSTYYMFDHLHQW

LILEKNMTHILQLLNDNMFSIITDVTIAISKDNDYILYDVYNHCKNYGGLLNITKLGTWTKNNGLQIILETNKFSRRWNYHRMKIKVAGLVVKRPKNQSLIDYLQEENLYEHT

DNWSKFGYAIMKHIKQLFNFTFELIELNHWEKNDSNGPLIAGLKNGIYDLGYFPSILTKERFNYADVILQVWPIRTCFMFLTVPSLKVDMDIIFRPFARNVWYMILILIVAIILG

LWIIFKLEENDSAYGSTILIIIAALCQQGLPFFNNQFSSRIAFLQTMIFGLLVYNYYSAAIVSSRLNAPLDKMNDSLYSLVNSRMKLAAYKDIYFNILLHSSVEEVQYFKKYWEK

IPEKKRYLSIQDGLKKMTTAKFAYHADPMNVYPFIERVFDKQMICQLTEVHLLRPSSLGLWSTRHSQFQEITKIGLIRISTSGIRKREVIRWTYRKPYCDKDKHYVSSITIHETIP

ILLVLCFGIILSIVICFIENIIFHTIRKKQRQIKESEF

>Mmed25a.1 MGTMGNWFWWNYIFLTNFLIVFAQQNQPPTGVRPVNLFIINDEENSLANNSVKNALMGIKDKDKTVLGNVIVVQINGSDPRGSLDKVCAAWDPAVRDGGPGVPDLVLDTT

RSGFGAEAINSFTASIGVPTFSSQFGQKNDLRPWNNLTPDQKNYLVQIMPPADLIPNAIRQLCSQMNITNAAIIFDKGFVMDHKYKSLLLNIPTRHVIVQSKIDTNEILNQLQRL

RDLDIVNFFVLGEEVTLKSYLDAAESKNFTGRKYGWYAFTMNENLDLKCECRNMSVVFFKPILTTSNQQHLSTLTTQGLLPAPWLASAFYYDFVRVGVEAIRSVIKNNKWP

NEPYHITCDEYNGTNTPIRNLDLLRHLQEATTNGFEPTFAGFYWGKSNGEHHAEFDMRIQMVVIENGNIVSADDLGTWKADIESPLNLTDTESKVAKHTAVTSFRIVTVRIAP

FIDINATGHWEGYCIDLINEVQKIMNFEYEIYESPDNKFGTMDESGNWGGMIKELIDKRADIALGTLSVMAERENVVDFTVPYYDLVGISILMKKKKEETSLFNFLTVLNQT

VWLCILGAYFFTSLLMWIFDRWSPYSYQNNKEKYKDDEEKRVFHLKECLWFCMTSLTPQGGGEAPKNLSGRLVAATWWLFGFIIIASYTANLAAYLTVARLEQPIESLDDLS

KQYKVQYSPINPSEAYTYFKRMADIEERFYEIWKDMSLNDSMTEIERAKLAVWDYPVSDKFTKMFQQMHEAGFPKTREEAIGRVRKEIPKYNNTDFAFIGDATEIRYLEMT

TCDLVMIGDEFSRKPYAMAVQQGSPLKDQLNNAILKLLNQRKLETFKSKWWSRNPYKVDCTKKDSQSDGISIQNIGGAFIVIFVGILLACCTLAFEYWYYRYRPRAQAKKL

KNLNSKNGGGNKISSQRIKPTRFNLKPARKAFEDSGTEFRARF

>MmedIR8a

MNDILPEAEKAAGGNDIVKVDVEKVELDRNNVSESLNQACAVLSRGIAIALDMTHTGWDKLREIIANNSIIYLRSDGSIIPFIQATDEFLKKKNATDFALIFENPSDVDPALYY

LLGASTLRLVIIDNLNNASISKIHDMKPQPSYYMIYSSTKGMEKLFQAAIDGNLVTRSGVWNLVFTDMDYKQFRYIRGPDVLDHNIGIFSMNSTVCCTPLEKIICECPPDFKIF

DQYLQVLMKQLVATFVKINSESGPKVRSIKGQCPLVEKPAEEDKIIQVFKDAIIEVTEADPLHTLEYMPKSSIVVHECLIDIEILENGTLNLLAEWTKDAITPVAGQVIAASQPH

FRIGTTASIPWVTLHTDPHTGEVLRDANNNLMAEGYCIDFIRELSKKMKFTYELVVPKDRKFGDKLPDGQWTGLVGDLATRRTDIAIASLTMTSEREEVIDFVAPYFEQSGILI

VMRKPVKETSLFKFMTVLKYQVWLSIVGAIVATAIMIWILDKYSPYSASNNKQLYPYPCREFTLKESFWFALTSFTPQGGGEAPKALSSRVLVAAYWLFVVLMLATFTANLA

AFLTVERMQVPVQSLEQLARQSKINYTVVNNSNAYQYFSNMKNAEDKLYKVWKEITLNSTSDQTEYRVWDYPIKEQYGHIFQTIKTVGTVANASEGFVKVLDSTKAEFAFI

HDSAEIQYQVTKDCNLTEIGEIFAEQPYAVAVQQGSHLQEEISRAILDLQKDRFFENLSAKYWNASLKDKCPTSNENEGITLESLGGVFIATLFGLALAMITLGIEVLYHRRKN

NLNDDKAQEANNKSVKKIPSKLIKPKLHQFKPAPTVAFIGRNRGLRSRVSHISVYPKTFPYKD

>MmedIR25a.2

MYNFHWRNILAFILTQCLIQTLQQNQPQNTVRSVNLFIINDEENIIANNSLNNAITNIKDKDPTVLGNVIVVQINGSDPKPALEKVCAVWDPIVRKGGPGVPDLVIDTTRSYFG

TKTVNIFTSSLGIPKISGRYGQQSDIKHWGNLTADQKNYLIQIMPPVNLIPKAFRQLECEINASNAAIIIDNNYVRDPAFKSLQQNISTRHVIVQAQINNDDIDKQLNRIHDLDIV

NYFVLGRENTLTNYLDVADDKNLTGRKYGIASNQQYLRKLTAQNLLPAPWLASTFYYDFVHISVEAMRSAIEGNLWPKEPRYFTCDEYNGTNTPMRNFDLLSQLRNATTN

GIKPTFTRFHWGRSNGEHHAEFNRRVSMVVIGDGNSIYSDDLGLWNSEIRSPLNLTENFDTGLAHYDSIPIYRIVTVRRPPFIDFNNETNDWEGICIDMLKEMQKFMRFEYKI

YESPDDKFGTMDESGNWDGMIKELMLDNADIALGTISVTAAREYVIDFTIPFYEPVGYSAITKRLLDRTRLFSFVGSLSVKVWSSAIVGFFTSSILIWVFDRWSPYSYRNDPN

GRFSENYVRKFRLIDSFWFVFSSLSPQGGGIPPKNLSGQMVAGVWWLFGFITLAAYSANLAAYLTVSRLQPILKSWDDLKEQFDIQYSPVNPSDAYTYFERLKDIEERFYFV

WKDISLNESLTDRERAALAIWEYPVDDEHTRLLGQMNEYGFPSSTEDGINRVLGLPPYPNDSSYALIAEATTVRYLAMTDCRFLLLEGEFSRKPYAIAVQQGSPLKELFDNAI

LKLLTEDKISELKKKWWDNNPKRQPWCPQRINKSDGMDIRQLGGIFIVLWVGIASAIVTLAVQYWWYRYRSRMRFKKDLENAGSLDNVEPKKFKVKPALRRISRVTNN

>MmedIR64a

MKSRTSVYLLFIIFLALSLSAIEGYDVLAKFTGDYFKKFYVTQIVVFGCWENHISVEFSKSIMLNTHSKLMYVNINDNLNLDKLLKVDYWSLGIVLDLDCQRSHIIFNQFSEQNLRHNESYFWLMPTSKEKIPDYFHKLPLNIANEMTLAVRKNNNLQNSGNETNNNNISYILYDVYNPSYRHGGKLNVTYMGHWSLNDRDEGTLTISLTQYKYKRRGNLYGL

VLNASIVVDHPPVPDYNTYIHNPINPHLDTMHRYNYALTLQLRDYYNFTMNLKRGSTWGYLINGTFNGIIGDMMKGLVDFGATPFQYKPERLDAIEYTVQAWMARPCFIFR

HPTTNELSNPFLKPFEMKVWYVIGIFAAVNWIFLYTSVKLEHKLVMKQPVCTLDTYPASEIIMITTSAICQQGLSDGPRFYAGRIVFIFLFIWGFLLYQFYSASIVGSLLAGKPR

WINTLQDLADSNLEVGIEDIAYNYDFFATTTDPVAQQLYREKVAVNKKRKREPYYTIEEGLQRMQKGGFAFHVDVATAYKIIEETFDVNEICDLVEIQLFPPKHTATATARFSPF

KKMVTYGLRQVVEHGMARRLRNVWMHRKPECPESHKDDPVPIMITEFSPALFLMSCGWFVSMCIVIGEKLAMKKQEIGEMKDGDADAKGYEDPEDFDRETASTNSQTSR

KSG

>MmedIR76b

MRGIELMLIGIYALTSNNTIDYTLPGRYDWEENLEEVIKKSFLTSVQKEQEYNEIPKEIKVTSWDESLYSSISEVNGEYKGGGYALKVFDIIAAKLDFKYKIVLPEKPILGDNVT

GVIGMLNQSKADVAVAFIPIIPEYLRFVQFSPILDYLEIAVLLERPLQSAIGSGLLAPFSRTVWICIFVSLALVGPIIYIVTSYRAYLWGRTKKDKYKFIDCVWFAYGAILKQGSAL

TPEADSNRLMFASWWIFITIITSFYTANLTAFLTLSEFTLAFTSVKDIVSQHKTWSAQQHYIVDITINRNDPEELTPLRTSYRQHRGIFYHISNKDNKTEKVASYLTNRRLFIDEIQ

FVENFIKNDYLNRTRQNMVEKKKCFYIKMPNPVFQQNRGFAYPSNSTISKIINRELLHLSESGIIQHIESVNRPMVTYCPLMLGSTERKLDNNDLELTYQVIATGFLFSLISFIV

EVSQHYFRCRVCLCCADSCTCCKTRMKEPVSPSKRPQLPLPPPPTITTVPIKTEFSSFTKPPVIPIYDTIDNFKNSKIHYVNGRDYFVVHETTGERRLVPVRSPSALLFQYNH

>MmedIR75u

MFSAPTKWLILQDIRYDNDSNSSKNYNDQENKLKMFSAPTKWLILQDIRYDNDSNSSKNNDDQENRLKDKLKDFEIFPDSELFISQRFDDDKIKILSIYRPSFYVDLIIEEQAT

WDINNGINFFDSIPTSRRRRNLQLTPLKTCLVLTNPDTLNHLTDYKDKRIDAVTKANYIWMMHLVNQMNATVTYTWRDTWGYPDKNGTWSGMIGLLDRGEIDFGGTATFLI

KQRIGVIEYLQLYTPVGSKFVFRKPPLSYVSNLFTLPFGHTVWYAIGVMSCIVLGFLYITMKWEWKEIEKSPGEQDELKSNPTISDNLLILLSAISQQGLSYEPRTISSRIVTFML

LIAALSLYASYTANIVALLQSTSSSINTLKELINSGLKLGIYDIVYNRYYFGVLDDPIRREFRERFVTNKTSIWITLEDGIEKVRQGLFAFHVDTAAGYQLMQETYEEEEKCGLQ

EIDYMGVLDPMLVIKKKSPYREIFRVGSLWLRETGLQQRDTPRLFTKKPVCVGHTSFISVGTTECYAAFYTITYGAAIAFGFFFLEIILYKCFGNKMTDDEESTECDADIEINTT

EISRQSSESLEATLE

>RcyaiGluR1

QYVPKDDSFRTSKKACKQLSRSVQGIFGPSDPLLGAHIQSICEALDVPHLEARVDFEPTFKEFSINLYPAQDHLNRAFKDLMSFLNWTRVAIIYEEDYGLFKLQDLVKSPPSTRAEMYIRQAGPTSYRQVLREVRHKEIYKLIVDTDPAHIQQFFRAILQLQMNDYRYHYMFTSFDIETFDLEDFKYNSVNMTAFRLVDVEEPKVAEVLRQMERFQPVGHAILNKTGVILAEPALMYDSVQVFAHGLAALDRSHVLRPANLSCDKEEPWDDGLSLYNYINAAGLHGLTGHVEFNEGKRNNFKLDLLKLKREELVKVGEWKPGSGVNVTDVGAFYETTAANITLVVMTREEKPYVMVKEDKNLTGNARFEGFCIDLLKWIAGQVGFQYAIRLVPDHMYGVYDPETKEWNGIVRELMEKRADLAVASMTINYARESVIDFTKPFMNLGIGILFKVPTSQPTRLFSFMNPLAVEIWLYVLAAYMLVSFTLFVMARFSPYEWNNPHPCLAESDVVENQFSVSNSFWFITGTFLRQGSGLNPKATSTRIVGGIWWFFTLIIISSYTANLAAFLTVERMI

>RcyaIR93a

MVGVIMEVAKSLDMVHPGNQWLYLASDTTAQDQNVTMLRDILGEGENIAILHNTSSTDDSCYTGLTCHVRELTRALAVALENSLAEEIALSEHVTEEEFEAIRFTKRERRREVLDKMERELYVGRTRSGESCDRCLSWTITSAITWGKSFVTGDKSEGTGYFLETGHWSPRPGAVLTDAIFPHVAHGFRGMILPVVTFHNPPWQIISRNKKGSAMFDGLIFDVLKQLSLRLNFTYSVLIASEVNNDQNRSPRDSSIAKAMNVELSSITNNIPDTIIELVQSKRVLIAACAFTVKEQKKNVVNFTRPVSVQTYSLLASRPRHLSRALLFMSPYTTETWGCLAAAIMIMGPILYLVHNWSPFYTNMRLSPGLNSPWDCMWYVYGALLQQGGMHLPRADSGRLIVGTWWLVVVVIVATYSGNLVAFLTFPRVDVSVSSIEDVLARENDLSWSLPNGSYLIEVLSSSDEPKFRRFFSGAERYNVTNDTDSMIRVKEGKHILVDWRSSLRFLMRSELLNSGSCDFSLSTEEFIQEPLAMIVASGSPYLPIINSELKRMHQVGLIHKWTAERMPIRDKCWEGPGVNQETNNHKVNMYDMQGSFFVLFIGFIFAVLMLSFELLWVKRNIILQRKLVRPFVT*

>RcyaiGluR2

NGGYAYFMESSTIAYQAERKCLLTQVGGLLDSKGYGIAMKKFSPYRQALSTAILTLQETGVLKDLETKWWTQKRGGGKCDEKKSTSDAQPLGTGNVGGVFVVLITGIGVASLLAVAELIFQVGWTSVKEKVSFKEEMKEELKFLVRCSQIAKPVRRRKSSSASSNSRDENSVRGCSPNYGFVPTVITTTPEEK*

>RcyaiGluR3

MRGGLGCLLASVLVIQIVNVNGLPPVVKIGAIFTHDQKDSSTELAFKYAVHKINEDKTILPRTTLAYDIQYVPKDDSFHASKKACQQVKFGVQAVFGPSDPILGQHIHSICDALDIPHLEARLDLDTEAKEFSINLHPAQTLLNTAYQDVMAFLNWTKVAIVYEDDYGLVKLRELVRSPRSREIEIHLRQADPESYRQVLAEIKTKEIRNLIVDTKPQHMHHFLNAILELQMNDYNYHYLFSTFDIETFDLEDFKYNFVNITAFRLVDADDVGVRGVLRDMEKFQQSGNTILNKSRIIQAEPALMYDSVQVFAVGLRTLEQSHALRPANLSCELEHPWDGGLSLINYINSVEMKGISGPIEFKEGRRIQFKLDLLKLKQHSLVKVGEWRPGAGVNVTDKAAFFEPGIANVTLVVITILEQPYVMLGTQSNLTGNDKYEGFCIDLLKEIARMVGFTYRIELVPDGKYGVYNYETGEWNGIVRQLMDKKADLAVGSMTINYARESVIDFTKPFMNLGISILFKVPTSHPARLFSFMNPLAVEIWLYVLAAYVLVSVTMFVVARFSPYEWNNPHPCHAGPDIVENQFSMANSFWFTIGTLMQQGSDLNPKATSTRIVGGIWWFFTLIIISSYTANLAAFLTVERMITPIENAEDLEGQTDIVYGTLESGSTMTFFRDSMIETYKKMWRFMENKKPPVFVPTYEEGIQRVLEGDYAFLMESTMLDYIVQRDCNLTQIGGLLDSKGYGIATPMGSPWRDKISLAILELQEKGEIQMLYDKWWKSPGDTCMRTEKGKESKANALGVDNIGGVFVVLLCGLAFAVLVAIFEFCYNSKRNAPSSSERSASAQPPPTCSGSLQGISQTTQPQQQQQQQQQQQQQQQQQGQNQNRNRNPQESLCSEMARELCLALRCNSSKRRRRGCEKCSSHRGSSGYNGENSNATPKNGMRSQRSSLGGAMDLPPHIHMHHGLSHDFDVDYD*

>RcyaIR25a1

MISRQLIIVFLLFFVTSVHSQQIEESSGFSSRSLNLLVINDEGNEFANKSVANALKELKTNRPDIPLGEIYVVQINGSDPRGTLDLVCGVWDAAVQLGNNKVPDLVLDTTMTGPGSETVNSFTAALGIPTLSAQFGQEGDLRQWRNLKPDQTNYLVQVMPPADLVPEAIRQLVISMNISNAAILFDNTFVMDHKYKSLLQNVPVRHVIVKAKAAGKPITDQLSRLRSLDIVNFFILGDRDTLRAALDGAQSLNFTGRKYSWHGLTLRDSSVECECANISVLFLKPSPSSNQQTIAELRNKGLLPEPILTSAFYYDITRLGVTAMKAAIDDGQWPSDSQHLTCDSYDGTNTPVRDIAFLGYLKNVSTNSEFKPIYANFTWGEKNGQHHAGFEMAITLVTIANSNPVSTEAVGTWDAGIDRQLEVISEDLIANHSAQTSYRVVTVIQAPFVMYDAETNIWSGYCIDLLEEIRSIVNFEYEIHEADDQLFGNMDNDGNWNGMIKELKEKRADIGLGSMSVMAERENVVDFTVPYYDLVGITILMQKPKTPTSLFKFLTVLENDVWLCILAAYFFTSFLMWVFDRWSPYSYQNNREKYKDDEEKREFNLKECLWFCMTSLTPQGGGEAPKNLSGRLVAATWWLFGFIIIASYTANLAAFLTVSRLDTPVESLDDLSKQYKIQYAPLNGSSAHTYFQRMADIEKRFYEIWKDMSLNDSLTDVERSKLAVWDYPVSDKYTKMYQAMKEAGFPKNMSEALDRVRASKSSGEGFAFIGDATDIRYLTLINCDLTMVGDEFSRKPYAIAVQQGSPLKDQFNNALLSLLNKRKLEKLKEKWWNGNPLKVTCEKQDDQSDGISIQNIGGVFIVIFVGIGLACLTLAFEYWWYRYRPKANNLNTSQNPKTTQSVKPVRFYLQPAAAPPRNAFDPPQFRGPRF*

>RcyaIR25a2

NDVWLCILAAYFFTSFLMWVFDRWSPYSYQNNREKYKDDEEKREFNLKECLWFCMTSLTPQGGGEAPKNLSGRLVAATWWLFGFIIIASYTANLAAFLTVSRLDTPVESLDDLSKQYKIQYAPLNGSSAHTYFQRMADIEKRFYEIWKDMSLNDSLTDVERSKLAVWDYPVSDKYTKMYQAMKEAGFPKNMSEALDRVRASKSSGEGFAFIGDATDIRYLTLINCDLTMVGDEFSRKPYAIAVQQGSPLKDQFNNALLSLLNKRKLEKLKEKWWNGNPLKVTCEKQDDQSDGISIQNIGGVFIVIFVGIGLACLTLAFEYWWYRYRPKANNLNTSQNPKTTQSVKPVRFYLQPAAAPPRNAFDPPQFRGPRF*

>RcyaiGluR4

MDSLKLFIKILFLLILFNQIVTSVSINDLRSNPKDDVEYVNPFASTDAKSVGDVDAAVSATEADDMNNTPQQVDNKMPSELLITTLQNMPFSGTTTKNGTIVGEGYAFYIFELLRSRMNFTYKIVLPDQGMLGDERSGVIGQLVRKEVDMAVAFLPVSPEIRKLIKYSTELGVIEWTILMKRPGESATGSGLLAPFDTNVWILILISVIAVGPIIYTLIFLRFLLCKNGEPRKYSLATCMWFVYGALLKQGSTLSPVTDSARLLFATWWIFITILTSFYTANLTAFLTLSQFTLPINSANDLADKNQKWMARQGGFIQRVVDDRSNEELAVLHRSYQRGNGEFLNLPDKDDQEVLGFVKSNKMYIRERPLVTELVFQDYMNKTREGILEADRCTYVIMPTNILTKSQAFGFQLNTTLDRMFNKKLLDLVETGIIKFKTSEHLPGTEICPLNLGSKERQLRITDLTMTYKGIGIGFAVAVLSFVGELVYRRLIKREKKTKYVDPNLPIYKTEDKTSGGVGGTMKQRSPPPLYQNINIQDYTKRQFINGRDYYVVKEKDGGRRLVPVRTPSAFLYQYPA*

>RcyaIR25a3

MFSNIIFNILLLNVASSQTNVRIMIVVEEVESSVNGLVNDVVSSAERDFGNGIINVEVSTVQIQREYEDESFERACSSLYRGVSLILDLTWTGWHKLRQISENSGVMYVRGDSVLNPLVQAMDDLLSVKNATDAALIFETEKELNQTLYYLIGHSIIRVVVLDELTEASTTRVRGMRPSPSYYVIYATTSNMETIFKAAIDGGLVRRDGTWNLVFTDYNYQDFRYLNTELVLNISINTLTMKNEVCCRFIGELPCTCPNDFQASII*

>RcyaiGluR5

GSTMTFFRDSKIGIYQKMWRFMESKRPAVFVSTYEEGVKRVLEGDYAFLMESTMLDYAVQRDCNLTQIGGLLDSKGYGIATPKGSPWRDKISLAILELQEKGVIQILYDKWWKNTGDVCNRDEKSKESKANALGVENIGGVFVVLLCGLALAILVAILEFCWNSKKHAQSDRSLCAEMASELRFAVRCGSRQRPATKQ

>RcyaiGluR6

LVDVFDKYRFDWNLENPMQLTVEAALVYDSVQLFGRALKRLDGASAADVNTLLCDNHETWKHGSSLLNFMRLTEFRGLTGLIKFDPAGYRSNFKLDLISLDARGIKKIGVWNSSSGIEYVPQPISEERKIELSLRNRTFIVLISLTAPYGMLKESANMETGNDRYEGFGVDIIIELSKALGFNYTFQEHDSTYGSKDKITGEWNGMIKEIMEDRADLAITDLTITADREEVVDFTMPFMNLGISILFTKPKPAGSNLFSFLLPYSTEVWKYLIGAFTLTSLLLFVIGRLCPAEWNNPYPC

>RcyaiGluR7

MATRLVLLAVFVVYASALPDFIRIGGLFHPVDDKQEVAFRYAVEKINANREILPRPRLSAQIEQISPQDSFHASKRVCHLLKNGVAAIFGPQSPHTASHVQSICDTMEIPHLETRWDYRLRRESCLVNLYPHPTTLSKAYVDLVKAWGWKSFTIIYENNEGLVRLQELLKAHGPSEFPIAVRQLGEGSDYRPLLKQIKNSAESHIVLDCSTERIYEVLKQAQQIGMMSDYHSYLITSLDLHSVDLEEFKYGGTNITAFRLVDPEKPELQKVVRDWIYGEQRYGRTLDMGQNTNKDNMTFIKTETALMYDAVHLFAKALHDLDTSQQIDIKPLSCESVDTWPHGYSLINYMKIVEMRGLTGVIKFDHQGFRSDFVLDIIELNSKEGLKKIGTWNSTEGVNFTRTYGDVYTQIVESLQNKTFIVTTILSSPYCMRKDSSEKLTGNAQFEGYGIDLIHEISRILGFNYTFRLVPDGRYGSLNRETKEWDGMMKELLDQKADLAIADLTITYDREQAVDFTMPFMNLGISILYRKPIKQPPNLFSFLSPLSLDVWIYMATAYLGVSVLLFILARFSPYEWENPHPCNAQSEVLENEFTLLNSLWFTIGSLMQQGSDIAPKAVSTRMVAGMWWFFTLIMISSYTANLAAFLTVERMDSPIESAEDLAKQTKIKYGALRGGSTAAFFRDSNFSTYQRMWSFMESARPTVFTTSNVEGVDRVVRGKGSYAFLMESTSIEYVIERNCELTQVGGLLDSKGYGIAMPPNSPYRTAISGAVLKLQEEGKLHILKTRWWKEKRGGGSCRDDTSKSSSAANELGLANVGGVFVVLMGGMGVACVIAVCEFVWKSRKVAVEERKQKSSGKPICEGFTDLH*

>RcyaiGluR8

VLIMVSSYTANLAAFLTTGKMGDTISSAEDLAAQTKIKYGAVEGGSTSMFFKDSNNSVYQRMWAAMHEARPSVFTKNNDDGLNRVLTGKRGYAFIMESTFIEYYVERHCQLEKIGGLLDNKGYGIAMPPNSAYRTSISKAVLELQEKGRLEELKKKWWKADNSTAKEICDKEETKEDTNELELRLDNVGGMFLVLGCGCAASLLVGILEFLWNVRKVAVEEKITPKEALIAELKFAVNIWEETKPVRVASRSRDSSTGRDRGGIGRAASVARSMVGSFLRLDMIDKFEKDNTSNNRSGKCGGD*

>RcyaIR2

MNYEQYGRSTASAQYFLQLAGYLGIPVIAWNADNSGLERRASQSSLQLQLAPSLEHQTAAMLSILERYKWHQFSVVTSQIAGHDDFIQAVRERISDMQDTFKFTILNAVLVTKPEDLSELVNSESRVMLLYSTRDEAIEILKDAKKRKITGENYVWVVTQSVIENLQTSQHFPVGMLGVHFDTSSASLVNEITTAIKVYAYGVEDFVNDPANANRSLNTHLSCEGNGDSRWNTGDNFFRYLKNVSVEGDQGKPNVEFTQDGVLKAAELKIMNLRPGVNEQQSVWEEIGVWKSWQKEGLDIKDIVWPGGSHTPPQGVPEKFHLKITFLEEPPYINLAPPDPITGKCLMDRGVLCRVAKESEMIGIDITEAHRNESFYQCCSGFCIDLLEKFSEELGFIYELVRVEDGRWGTLENGKWNGLIADLVNRKTDMVMTSLMINSEREAVVDFTVPYMETGIAIVVAKRTGIISPTAFLEPFDTASWMLVGLVAIHAATLMIFLFEWLSPSGFDMKVNPSSAPQKLLSVSQINPSPNHRFSLFRTYWLVWAVLFQAAVHVDSPRGFTARFMTNVWAMFAVVFLAIYTANLAAFMITREEFHEFSGVDDHRLAKPFSHKPMFKFGTIPWSHTDSTIAKYFKEMHAYMRTFNKSTVSEGIEAVTSGDIDAFIYDGTVLDYLVAQDEDCRLLTVGSWYAMTGYGLAFSRNSKYVQMFNKRLLDFRENGDLERLRRYWMTGTCKPGKEVQKSSDPLALEQFLSAFLLLMCGILLAAVLLLLEHLYFKYVRNHLAKSDRGGCCALVSLSMGKSLTFRGAVYEAQDILRHHRCRDPICDTHLWKVKHELDMARIRIRQLEKDLEAHGIKPSQAKRKPGKLGWWRGCLPTTDHSHLHPPFAVEAPHPLPPYFDSFVDAVEVARPRDMTRNHVASTEYSERFLPTEIYRISDDRTTAGRTEIAEMETVL*

>RcyaiGluR9

MLMKFLLVVLLPSGVLGFGKTVSIGGLFEEDSLLKKIFQLSILSLNRERYGNDELPNQFIQSEPVMVVNNNSYDIARSVCDLGNKGVAAVFGPQDEITSLTVQSMCDTMEIPHVAARWDSRQMRGNGLINVYPYSQTLSTVYLQLVEAYKWKRFTVIYENTECLSRLKKLLELWDKNGYPVTVRQLAEESDYRGTLLEVKHSGDTNIVLDCSIDILPEVLKQAQQVGITSDKHNYIIASLDFQTIDLEPYQYGGTNFTGLRLIDPEDPVVVEMFYKTELDLENPSQLTVEAALVYDGVQVFGRALKQLDDAIVADVRTLLCDNLDSWEHGSSLSNFMRLTEFRGLTGLIKFDPAGYRSNFELDVISLEP

>RcyaiGluR10

GVQLFGRALKQVDDTSTADVETSLCKNVSSWKHGSSFLNFMRWTEFRGLTGLIKFDSTGYRSDFKLDLISLNMHGVAKIGVWNSSTGIEYVPQPISEEHKIELSLRNRTFIVLISITAPYAMLKESASVETGNDRYEGFGVDIITELSKALGFKYIFQEHDSTYGSKDKITGEWNGMIKE

> RcyaIR1

WKVEKIYTQFENQKRNFQSSMNVFQIYILNVGVVFYTDKVNLFTYIPWTSPFEIQNLTDQ

GIFANIFYNKLKNLRKYPIRILHQ

>Rcya75a1

LNVTMLGSWNNVSGLNVTLVQEKYERRRNFHGMTLKVITVTQYRPHYMRLEDYLQDYDSK

SLDSMPKFTFTLLSHIGDMFNFTMQIAETGLWDQVDQNGEHQGMVGMLNRSEADFGGSPA

RITKGRIDLAQLTFPVWPFRSCFMFRSMRTRLHDEFFRPLTMESWAATGLMFVICVIIL

>RcyaIR75a2

MFVRRMRQIIEHGMTERMSDVWQYKRPQCPASHNLNPVQIPIEEFSPALILLIIGFIGAV

SIFFAESYTRWPTLDCCVRKRRKIDY

>RcyaIR75a3

EIARDYFVRKNLSSVVAFMCLDSTDDFHFIKILNTEGIKVAIFYPESNFSLEIVMTLKFS

RLGVFLDLHCPDRYSEFILAESSKLRIYNESYDWLLFGKSLNDSIEILNDDTFSISTDLV

IVTPSVDDNYELHDVYNPGKERSGKLNV

>RcyaIR21a

YELMRIIAKAMNFYPEIYLPPNVENERWGTIGDNESFSGLFGEAISGKTAFFLGDLYYTAQHLEFFDLSTPYNTECLTF

Supplementary Data S6. The amino acid sequences of Niemann–Pick type C2 proteins (NPC2s) from 11 Hymenoptera species.

>RcyaNPC2a

MFPIVIITALICFSSFTDGFPVEDCGGSLGNFSRVAVSGCDDSDNACVLHKGRNASIEIDFTTNENAADLRTVVHGTIVILPIPFVVPQPDACKDPNSGISCPLTAGKNYQYKATLPVKQNYPPVSVTVKWELQDEHGNDIICIKLPARIR*

>RcyaNPC2b

MFCLVQLFSNYFIAVILLAVCLAAGTQAATPYVSCSQNADPVDFRLEGCTQTPCSLYRGEDVTAEWDWEVSADTSRLTPRVRATVGGILTVDYDIGQENACDTLTNTACPLEEGELATYALTMPVLASYPTISLTIEFALVDDHGNAQVCFRVPARVVNRY*

>RcyaNPC2c

MSKITLFLLIAIYAATSSATMVVHCGSGLEYENNDLVKISQCNEPPCVFKRRSKISVEQTIVPQEDVQSLTTSVYAYIFNLPVPFIGVNGFDACNSIFNADGTKASCPLTKGKQYVYKNSFPILDGYPRINLVVHWALTQNSKDIACFEVPAKITS*

>RcyaNPC2d

MKKITSYTVFVALIALASHISAESISWQPCENEENECTIHEARIQPCREAAHGNPCAVRIGRSASISFDYTPDFSGNLESGAYWKNPTIDLPFLDMDTNACAYTTCPATAGTRQTYNYTLTIPTKISRRIYNIKWKLRNSENKACCLEFQIKIK*

>RcyaNPC2e

MYLRVAAVLLCSLHFTNGLNITNCASDKTLATVDSISILGCVDSSQDVCTVARGVDISGTLNATLNQQVWSLSYRAIASFDQFVIPLPLSLDISYPGNVRVRPFQEGTILHAKSSGIKVSADSVPTPNITVQVKIEDENDRKLVCIEYQAEIA*

>RcyaNPC2f

MNMIVHNPTRAWSDVYLESIAVSGCWSYPCHLRIGSAVRVTTNLLIQGAPVNTDSLIHEASLEVNSIRTPVRVHPDPCSAFRSPRGASATCDLRIGERITYEATLDVTGVPPLPARLSWTITNPVTNRILICYRMTVVLTTVDI*

>BdioNPC2a

MNKAILILLALVAVQTSATPVNICESDIVDTSSVTIENCDKPPCVVKMGQTVGFSLKFTPSWPIRNLTVHIEASNWLLTIPIFDDSICNKIFLARNNSLFPCPLCPQIEYIYRDEIR

APELPFTNSLEGTVKLTLETNSESFKCFKASVCIRPRLYRMMHEYLHRCSEITNQFTGMLN

>BdioNPC2b

MKSTIAVAALLSILTVVRGTTVSQCGDIPLPDDVQIENCDQPPCVFYINTTSSMTMTFKTPRKLEHIAPSAVAHVMSIDVSYPLDQDDACDGIVNTECPLDDNQVVEYTYSMF

ILPIFPEITLTLEFALVDKDQDNEPFECFQVELALKSQP

>BdioNPC2c

MLCKVLALLLFAACVCAYEDCGSKDGSIVSVTISNCSNDKKCILKRNTNASIEIGFTTNDDSDVLTAVVHGVVLGVPFPFNLPNPDGCKDSGVSCPISAGQTYNYKTSLPVLASYPRVTVDVKWELQDKDGNDVVCVLIPSQIK

>TpreNPC2a

MKFICGSIVACLLVATVAATPFTNCQEGAPPSALRVEGCDKAPCKLRRGTNVSAEWDFTVNADTKHLTPRVRATTLGMTVNFPFPQKDACETLIGTSCPLIAGDNVTYKLTM

PVARYYPQVSISIEFAFLDDAGQVAVCFKLAAKTA

>TpreNPC2b

MTKAIVTLAVCALLVALASATRVNECKSGKAIEDTTKVQITNCETPPCKLKKRTKVQIVQRFTPNRDVQSVKTAVYATILGVPLPFVGVDGTDACGKVFNAADGSPAPCPLK

KGVEYLYKNEFPILPIYPTVQLVVHWALEEPDKKVVACFEVPSRITV

>TpreNPC2c

MLRLALSILCAVCVGAVEFRDCGSTAGSFDRVEVAKCDASSHSCVLRKGHDGSLDLHFTPSKRCEKVTAIVHGIVDELDVPFPLPNAEACQDPQSKVGCPLEPGVASNYHAT

LPVLHSYPTVSVKVRWELKDENNDNIVCVEFPVSIR

>NvitNPC2a

MKFIAGFIIAAFLVASSTQSTPFKTCKDGAAPKDVRVAGCTKNPCSFIRGRNVSAEWDFSIPEDTKALKPRVRATVLGATVNYPFPQKDACNTLTNAKCPLETGEDVTYQLSM

PILKSYPKIPLTVEFAFLDDKDKVVVCFSLSAKVADK

>NvitNPC2b

MEQIRGNMKIITRFIICASLVVLSSQSTPVEKCKDSPTPKDVRIDGCTETPCSLVRGTTVTAEWDFSILE

DTRALKPRVRATVLGMTVNYPFPQKDACSTLTNAKCPLEAGEDVTYQLSMPISKMYPKISLTIEFAFLDDKDNVVTCFAVPAKVTSK

>NvitNPC2c

MMRSFALVALFCAATRAVEFKDCGSTAGNFDKVEISNCDLSAPACVLKKGTDASIGLHFTPNKASSRVTAVVHGIIEDIDVPFPIPNAEACFDNHSGVVCPLPAGTGTSYHAN

LPVLAKYPTVSVTVKWELKDEKGANIVCVEIPVSIQ

>NvitNPC2d

MAKTALFLIAVAGLIALTVATRVNECGSGKALPDTTQVQITNCDAPPCKLKRRTKVAIEQKFTPSQDVQSLKTSVHATILGIPLPFIGVDGTDACGKIFNVADNTPATCPLKQGT

EYIYRNEFPVLPVYPTVALTVYWALKENEKPIACFEVPSRII

>MrotNPC2a

MLRETILVFAALLVLAAATEVNKCGTGEKLEDPNQAKITGCDVPPCKLKRRTKYTIENKIVPDRDVDNLVNSVNAAILGVPLPFVGVDGTSACDSMYNVDGTPAGCSLKKG

VEYIYKREFPILQIYPTVSMVIHYELLDGNHSIACFEVPAKITN

>MrotNPC2b

MNRNTEFLLVFLFLALSVACAERIPWRTCPYPDSNTPTNCTIHEVYLDPCAEAKEEKPCKVKRGITANMTFHYTPEFTSDKMNVRIFWASQVMDIPFLGMDPNACLSTTCPV

VAGQRNVYHADIPILKKYPVRTYDIKWKIWNEEEQECCFMFQIKIVK

>MrotNPC2c

MAYLTYAFILVAFFVADSMQSNFQTCSGQPAPKSVVISGCNSLPCNFKRGTNVEARITFGVTQNTKSLKPDVDVELGKIHVKYPLPQQNACMDLESSRCPLEKGEVAVYKLK

MPIEKSYPKVSLTIQLSLLDERSQSQACIRIPAKVVD

>McinNPC2

MTSAKIFILWVLGVWVMIINGYEDCTNLKDISNPNGTSLGTLQGFNVSDCDVNKVCIIDHNSTTTLSMDFTLNERVEVVNTKVEASLGFISLELKIGHPAPCNDTNSGLECPL

EPSDTAYHYTVTDQIKFRIRNQKINVKWSLLNEDAKTIVCAQVAVMFR

>AmelNPC2a

MRGTILVFVALLVVVCATEVNHCGTGEKFEDPNQVKITGCDVPPCKLKRRTKASVEQKFVPKQDVESLVNSVNAAVLGVPLPFVGVDGTSACDNIYNLDGTPAGCSLKKDI

EYIYKREFPVLQIYPTISMVIHYALMEGNNTIACFEVPAKITN

>AmelNPC2b

MNRNGMFLFAFFLFVLSTVYAELVPWRQCPYPDPNTQTNCTIHEVYIDPCKEITEGKPCKIKRGVIGNMTFHYTPAFSSDKVQGRIFWASQVMDIPFLGMNPDACLSTSCPIE

AGSRNTYHVEIPILKKYPVRTYDLKWKIWNDEEQECCFMFQIKITK

>AmelNPC2c

MYRMIVIILIVCLCFSPMYRAINIDDCGSKVGKLTSITLDCDMTKSVCDLIPDTNATIRIDFTLEKDVSK

VNAIVHGIVMDIPIPFPLPNADACQTPDSGITCPLNKGETYHYKNTLPVHKSYPKVSVTVKWQLKDENNEDIICVLIPARIK

>AmelNPC2d

MAILTYVYVFAVLFIANSMQAYVPCDGKPAPTNVKILGCDTLPCNLVRGTNVEANVDFKAVANTKTLRPVVDVDLGNSHMQYPLPEQNACKNLVNGQCPLQSGQAATYYL

KMPVLKAYPKVALTIQLSLVDENNNSEVCFKIPAKVVD

>MmedNPC2a

MYRIILGLVLCLSVSTYAVIQDCGSKVGKYHNVTVSDCPSDAATCILKRGTDATITISFDVDKEVSQVKAVVHGIIGGAPLPFPFSHPDGCQTSGLTCPLTKDNGPYQYSTSLH

VEKLYPKLKVGVKWELKDENEDTIVCALIPSEIK

>MmedNPC2b

MLRNIFPVVLSLLCLTFLTEAVSYDQCKDAKDNHSIRLLTISNCESAPCPLKRQTSVMVEEIFVAKKNVKSLTTSVFAKVAAFWLPFVSVHNKNACDNIYNMDNSIAGCPLKA

GTEYKYRNEFPILSIYPTLTLPVQWAKDKNEIITCFQVYVKITN

>DallNPC2a

MCRTICALVVCLSALASAAEFKDCGSSVGKYSSISISDCGASDSECILTKGTNATIEISFSTVEPVNAVK

AVVHGILTGVPIPFPISHPDACANPDTGITCPLKKDQAYTYRKTFPILAQYPKVKVEVKWELQNEKRQDIVCILIPAKIQEKKSAN

>DallNPC2b

MKNFLVILGVACVALVGADVVQFQPCSYREPTQTNCTVHELRINPCAEAAEGKPCRVKRGTDASIEFDYTTNFAADTLQGRAYWANKLMDVPFLGMETNACLSTPCPLKA

DTKQTYKMALHVDTKYPARSFDVKWKLWNQQEQECCIVFQIKLTK

>DallNPC2c

MLGLKVLVIVGFCVAASLQDTPFTKCKSGGPAPEGLRVKGCDKTPCKFAKGTNVEAEWDFNVVADTDDLKPIVKARALGITVNYPLPEQDACKSLTNGECPLEKGELISYG

LKMPILKAYPNVDLHLTFSLVDQKENVHVCFELDARVVN

>DallNPC2d

MFGKTALVFTTVLCFVAFGESTDVIECKNGRNLDNIKSITITNCEEPPCELKRGTRVELVQKFVPNEDVDRLTTSVSATILGVRLPFIGVDGSDACQNVYDADGKVGCPLKAG

TEYYYKNGFPVLEIYPKVKLVVSWALLGSSNPITCFEIPSKITS

>FariNPC2a

MYPIICALLVCLSVLTSAADFRDCGSQVGKYTSISISDCEDSDSECILTKGTNVTIKITFNTDEPVNVVK

AVVHGILTGVPIPFPIAQPNACNNPETGITCPLKKGGPFTYTKTFPILSQYPKVKVEVKWELQNEKNQDIVCIMIPARIE

>FariNPC2b

MLGLRVLIIAAFCVVGSLQDTPFTKCKAGGPAPEALRVKGCNTTPCRFVKGKDVEAEWDFNVVADAEALKPVVKAKALGITVDYPLPEQDACKSLVNGECPLEKGELVSY

GLRMPILKAYPKVDLHLTFFLVDPQKNVHVCFEIDAKVVDN

>CchiNPC2

ADKMYRITLGLVLYLTVSANAAFQNCGSKIGSLNNVTVSNCDPDASICILNRGKNVSIEINFNLDKDIKRVSSVVHGIIAGATLPFPIAHPDACVASGLKCPMTKDGGPYKYK

TNLAVETFFPKIKVDVKWELKDETATNIVCVLIPSQLK

>MdemNPC2a

MYRIILGLVLCLSVSTYAVIQDCGSKVGKYNNVTVSDCEPDAATCILKRGTDASITISFDVDKDISAVA

VVHGVIGGAPLPFPFSHPDGCQTSGLTCPLTKASGPYTYTTTLHVEKLYPKLKVGVKWELKDENDDNIVCAMIPSEIK

>MdemNPC2b

MFAKAFIIASFCVAASLQWSQFKSCGDHTQDPHRLVIEGCTTFPCIVQTGHNKAGQWDFIATTKTSVLKPQAELAIGGLWYVPYPLGIDDGCPYLISKKQCPLEAGDQVTYF

FSRAIPRVPSGVIVWARFTLKDENYNTHCCFEVEFKAA

Supplementary Data S7. The amino acid sequences of odorant binding proteins (SNMPs) from 14 Hymenoptera specie and 10 CD36 familys homologs.

>BdioSNMP1a

MAMNRMMKFAIAGPCLMMFGILFGFVAFPKLLKGGIHKMVNLKPGTDVRALWSKIPFVIDFKIFLFNVTNPDEIKNGAKPIVREVGPYYFEEWHEKNNLVDNEEEDSVTYS

PKNTFIFRPELSNGLTGEEELMLPHIFILAMVFATMREKPSAAPLINKAINSIFKNPENVFVKAKAMDLMFRGLPIDCSVTDTAGAAVCSLLKANADDLIVDDPDHFRFALLGA

KNGTTSKNRIKVLRGVKAQNDVGVVIELNNKTKMTTWNDTKCDAYQGTDGYVFHPYLYADEDIVSFAPDLCRSIAAYTESTFKKQGLMVNRYTAWLGDPVKHPEQKCYC

PTSGCLKAGMMDLHKCVGVPLVASHPHFFRADEEYLTTVDGLSPSAEKHMIFIDFEPFSGTPLEAQKRLQFNIQIHKVEKVKIMKNFPSAMLPLFWVEEGLVIPDSFVSQVK

MLHMVVTVMKCLTWIKIVAGLGMTGYAGFLYYKSTQSSQKLEITKPPKQENGVKPPISTLDANFLRAQVPPAID

>BdioSNMP1b

MGKMSLMKKLGIGGGIMFVLSILMWFGFPKLLVSMIKSQINLKPGTDVRGVWSKIPFPIDFRVYLYNVTNPDEIKAGAKPIVRQVGPYYFEEWHEKDNLIDRDEDDSVEYAI

KNTFYFNAEKSGEGLTGEEELMLPHVFILAMVMTVVRDKPTAVPVINKAVNSIFKSPDNVFMKMKAMDLMFRGLMVDCTVSDFAGGAVCGMLKENPDGLIVYDEDHFGF

ALLGAKNGTAAKQRLRVLRGRKNLMDIGKVIEYDGKKNMSKWDDEKCDAFNGTDSYVFHPFLYEDEDVVSFAPDLCRSLGAYFQKKTKLAGLNTNRYTAYLGDPSTDEN

LKCNCEAPDKCLKAGMMDLHKCLGVPLVASHPHFYMADESYLEMVDGLSPKQEDHEIFLDFEPFTGTPMYAKKRLQFNIPITKVDKFKIMKTFPTAMLPLFWVEEGVLLP

DELIAQVKMIHTLLTVVAVMKWLMLVGGLGMGGGAGFLFYKATQNGNKLEITKVPKQNGKPSSTEKKISPLNVNTLQAQVPPVLD

>BdioSNMP1c

MKNTYYFNAEKSNGLTGDEEIVIANLFALGLVNTLLREKPSAIPIFGKAIDSIFKKPDNLFIKTTPKKILFDGIPIDCTAKDFAGAAICGEVREKYEDFGMIKTAEDEYLFSLWAT

RNATESKKPTRVLRGLKNIMDVGRVVEYNYKNNLSIWDDEYCDRLNGSDGTIFHPNFDKHGKDPMIAFNDGLCRAITLTYEKPSKFKGLKTLQYTTDLGTDPDNPLHKCYCQAPDNCLKKGVYDAYKCVGAPIVVSNPHFYLADKEYLEQVEGLKPDKALHAVAIDLDAFSGTPVQAHIRAQFNFFLFKVEKYKIMKNFPSALLPIFWFDEHTVLPKFLIKE

VKMGHRLLMMGNVFKYLVLLGGLGALGYGSFMQFKEMQGNEVKIKKTVKAKNGNETNGNDKKMPMNISSTISVPPIVE

>BdioSNMP1d

MMITPLWFTHLKEVALTRGTLKRQTWTKFPFACELRVYAFNVTNPDEILKGEKPILKEIGPFVYDVWHEKINLVDDEETDTVTYSVDNTYLFNTEKSKNLSDTMELTVASYL

AFAGVNSAMKDYAALISVASKAIDAVGRNPPSIFLKEPLRTFLFGDEYYDCRGLTDFAPKVMCNSARDHYTEYRMRKRAEDLYSYSVFSGVSATTAYSIKHYL

>BdioSNMP1e

MGKIDLFSTRIRKIGAAGLCLFIFGIILRTAILHSMLESQIKKRIVLKKNSAMREIWSRFPYEMHVYLFNVTNPDEIAKGQKPIVKEVGPFVYDVWQEKINQIDYEDNDSLSYL

SKDTYFFNTEKSNGLSDDTELTLIHLVCIATPNKLLKINPTVLSYGVKGIYNIMNNPESIFFKFKVRTFLFDGIRFSCEGKDDFFATAVCNDIKQFWFSYRMEKGDDYFALSIFG

TMNGTDFYNGKTRIQRGTKNMMEVGDIVEYNDMNNMSIWKDDICDALLGTDGTMFHPFLDANKNNVLHVTRPFYCRSFTYQYDSDVEFEGLKLVRYTASLGSDLGTNP

KDKCFCISPDRCLKDGVYELLKCFNLARIGSNPHFYLADPYYGTTVEGLKPMKEKHMSIIDIDPLTGLAVRSHFRIQFNVELTAIKKYKLMQNFPDAMLPMTWIDEVTIMPD

YFISKIKNIYKMADVVKTLSYLMMFSGLTMCGYSIFREYKLKKEKRAVVKTVALEMRNNETNGD

>BdioSNMP1f

MRKIWSKWSSPHEYHVYFFDIINPDEIVKGEKLIVKETGPYIYDVWLERIDMVDHEENDTLGYKLKKTFIFNATKSHPLTEEDEVTLVHLVILGTANSLLRSRPSLLPLASKSI

DSLFNKPKSLFTKVSVKTYLFDGFQIDCVGVEEFFAKAVCNDAKEFWFNYRFVQVREDYYTSSFLDTFNNTVAWVGESRINRGIKNITKIGEFVKYNNTNNFAKWDDEKCD

AFVGTDGTMFRPFLSRTDDLHVVNEYLGRSFTYEYDSDVTNSGIHCFRYTASLGTNPETNTNDKCYCLTPDDCLKNGVFETWKATNWPCIISNPHFYLADPFYNGRVTGLN

PNREKHISTIDVHPLTGTVVSAKFRAQWNGPLTKQPKYRLLKNVYETLLPMIWYEEKFTLPARDIRSLKKLSSKIAFEKLFTIMIIVSGLMLFVVGVAYEISLKYKSLKSKT

>BdioSNMP1g

MRINRGIKNIEEIGKVVRYNNTNNFGKWGNEKCDAFVGTDGTMFPPFLSRSDDLHVVHTLTSRSLTYKYESDISYGGFDCYRYVATLGADLETNPDDKCYCLSPDQCLKNG

VFEGWNAVHWPVVGSNPHFCLADPYYIERVSGLNPDPKKHLSTIDVHPLTGIVVGAKFRLQWSAPLTKQPKYRLFENVSEALLPIGWTEERYYLPPPEMENLKKLNFKIVVE

KFLAYHIIAIGFALLFMGILFEVLKRKKPK

>BdioSNMP1h

MMENPKLLRYRVCAAIGLCVSILGVISLEYVIPSMEKRRILKAIALKDGWPARKTWNELSFSNEFRAYLFNITNPDEISNGGKPIVREIGPYVYDVQLEKVEVADHEENDTMS

FKIKRTFYFNATKSYPLSDEDELILTHYLILGTATGVLKTRPTVLPLASKSIDRLFNNPKSMFFNTKVKTYMFDGYELNCVGVEDFFAKAMCSDIEEFWYDYLMVKVRESVY

TSSTMGIWNNTLAWVGETRINRGIRNITKIGEFVEYNHTKNFGKWGDEKCDKFVGTDGTMFPPFLSRKDDLHMVFTTLKRSLTFHYDSDVVHDGIKCYRYVATMGIDLET

NPDDKCYCVEPDRCLKNDLFDTWKAVRFAAVVSSPHFYLTDPYYDDIIVGFHPDKEKHISYIDVHPLTGSVVNSKIRTQWCVPVSKQPKYRVMKNMADTLLPLGWLEDSFT

MPESNIKRLKKLSSMIAMEKICVYVVTAIGLAFFSVGVTCEVLNRRKSKQPN

>AccSNMP1

MKPKKLGIIGGSLLAFGILICAIAFPPFLKSQVKKQIALKDGSEMRELWSNFPVPLDFKIHLFNVTNPMEITAGEKPILEEVGPFFYDEYKQKVDLVDREEDDSLEYNLKATWF

FNPSRSEGLTGEEELVVPHVLILSMIKLTLEQQPAAMGILNKAVDNIFKKPSSVFVRAKAREILFDGLPVDCTGKDFATSAICSVLKEKDDALIADGPGRYLFSLFGPKNGTVL

PERIRVLRGIKNYKDVGKVTEVNGKTKLDIWGEGNCNEFNGTDSTIFAPLLTEQDEIVSFAPDICRSMGARFDSYTQVKGINTYHYKADLGDMSSNPEEKCFCPTPDSCLTKNLIDLTKCVGAPLIASLPHLLGAEEKYLKMVDGLHPNEEEHGIAMDFEPMTATPLSAHKRLQFNLYLHKVEKFKLMKNFPECLFPIFWVEEGILLGDEFVKKLKTVFKTISIV

GFMKWFTIVSGTCVSGAAAALFFKNKDKNKLDITKVTPQKSGEKKWPNQMTISTIQSAAVPPNLDAD

>AdorSNMP1

MIMYIIILFPKILPLFLVVSTAITVEKHEKINNKLLKKHDKRGLTNLEYSLSEPGYHPPEPAIFEPSAPDLSGHLESAIAPVAPPPAVLHPAPAVPVPAVPVPQPVXHPVPVAVPQPV

PHPVPVAVPQPVPHPVPVAVPVTKHVPIPVPIDRAVPVPVDRPVPVPVAVPVPKPYPVHVEKIVHVDRPVPVPFEKPVHVPVDRPVAVPVPVPKPYPVPFEKIVHVDRPYPVHV

AVPYHVPKPYPVPVAIHAHKSHGWLFNVKVLGNHSNSRFFFSKIFEQMHFKKLIYDVTTRFFHRGVHVILHSSFVSLQSFVTTGRKLHETLRVPVGCKRVTMKPKKLGIIGG

SLLTFGILICAIAFPPFLKSQVKKQIALKNGSEMRELWSNFPIPLDFKIYLFNVTNPMEITAGEKPILEEVGPFFYDEYKQKVDLIDREGDDSLEYNLKATWFFNPSRSEGLTGE

EELVVPHVLILSMIKLTLEQQPAAIGILNKAVDNIFKKPSSVFIRAKAREILFDGLPVDCTGKDFATSAICSVLKEKDDALVADGRGRYLFSLFGPKNGTVLPERIRVLRGIKNY

KDVGKVTEVNGKTKLDIWGEGDCNEFNGTDSTIFAPLLTEQDEIVSFAPDICRSMGARFDSYTQVKGINTYHYKADLGDMSSHPEEKCFCPSPDSCLTKNLMDLTKCVGAP

LIASLPHLLGAEEKYLKMVDGLHPNEEEHGIAMDFEPMTATPLSAHKRLQFNLYLHKIEKFKLMKNFPECLFPVFWVEEGILLSDEFVKKLKTVFKTISIVGFMKWFTIVSGT

CVSGAAAALFFKNKDKNKLDITKVTPKKSEEKKWPNQMTISTIQSAAVPPNLDAD

>AdorSNMP2

MWSYQVCAIICLIFGIYAFITNMFSEGLFSIKNIILKNLPLVKDKDTYNAWISPVSLIFKCYFFNVTNPDEVMQGANPNLVEYGPFTYREVYEKQIVDVDEEFDEIIYDIKSTFTF

DKYASVNISKRDTVTILNPAYIGTISMLTTLPPNYMDKFGNNIPKLFPNRNSIFLKANPKEILFDGVKLTCNEKKFPELSTICKTLKALRSPVLKEGEKDGVYYLSIFQRVNGTI

RGRFSVNRGINNISELGNIASYNGKKVQTIWKTEKCNIVRGSDTITWPPLINPMPSVLTFIPDLCRSVEVDYDKKVSIYGLTGFRFAMKERTWFLNTSQCYCLEKNKVPNCLP

QGLIDVSNCLVMLRYENEEISLVYVLKFNMLQKVPIIISEPHFLHGDPQLLMYAHGLNPDKDLHETFVVIEPYTGTPLSGQKKIQLNLKLERQPVNLLSNISEGYFPLLWCSNV

RIFSKIIIFQH

>AfloSNMP1

MRFKKLVYDVTSRFFHRGVHVILHSSFVNLQSFVTTGRKLHETLRVPAGCKRVTMKPKKLGIIGGSLLAFGILICAIAFPPFLKSQVKKQIALKDGSEMRELWSNFPVPLDFKI

YLFNVTNPMEITAGEKPILEEVGPFFYDEYKQKVDLVDREEDDSLEYNLKATWYFNPSRSEGLTGEEELVVPHVLILSMAKLTLEQQPAAMGILNKAVDSIFKKPSSVFVRAK

AREILFDGLPVDCTGKDFATSAICSVLKEKDDALIADGPGRYLFSLFGPKNGTVLPERIRVLRGIKNYKDVGKVTEVNGKTKLDIWGGDCNEFNGTDSTIFAPLLTEQDDIVS

FAPDICRSMGARFDSYTQVKGINTYHYKADLGDMSSHPEEKCFCPTPESCLTKNLMDLTKCVGAPLIASLPHLLGAEEKYLKMVDGLHPNEEEHGIAMDFEPMTATPLSAH

KRLQFNLYLHKIEKLKLMKNFPECLFPVFWVEEGILLGDEFVKKLKTVFKTISIVGFMKWFTIISGTCISGAAAALFFKNKDKNKLDITKVTPQKGEEKKWPNQLTISTIQSA

AVPPNLDAN

>AfloSNMP2

MWSYHVYAIICLIFGIYVFTTNMFSEGLFNIKYSILKNLPLVKGKDMYNAWILPVSLIFKCYFFNVTNPDEVMQGDNPNLVEYGPFTYREIYEKQIVDVDEELDEIIYNVKSTF

TFDKYASVNISKHDTVTILNPAYIGTISMASIIGLTNLPSNYMEKFGNNIPKLFPNRSSIFLKANPKEILFDGVKLTCNERKFPELSTICKTLKATRSPVLKQGEKDGVYYLSVFQ

RINGTIRGRFSVNRGVNNISELGNISSYNGKRVQTIWRTEKCNTVRGSDTITWPPLVNPLPMVLTFIPDLCRTVEADYDKEVSIYGLIGSRFVMKERTWFMNRSQCYCLERNK

VPNCLPQGLIDVSDCLKVPIIMSEPHFLHGDPRLLMYARGLNPDEDLHETFIVIEPYTGTPLSGQKKIQLNLKLERQPVDLLSNISEGYFPLMWCANVRIFSKIIIFRH

>AgifSNMP1

MPLWRKLAIAGGSMLAFGILVGFIVFPPFLRKQVKKQIALKPGAEMRTLWSQTPFPLDFRIYLFNITNADEIKTGAKPIVQQVGPFFYDEWKEKVDLVDREEDDTVEYSNKA

TWIFNKKKSGPGLHEDMELVFPHIMILSMVYATVRERPGMVGLAAKAVDSIFHKPDSVFVKATVREILWTGLPVDCSVQDFAGKAVCGILREDDSSLLKDGETNYKFAIFGP

KNGTVVPDRLRVKRGVKSYLDVGIVTEYKGEPKLSNWLEDSDCNLFNGTDSTIFHPFLYQDEDVVSFAPDLCRSLGARFSHHSSVKGLKTNHYTAELGDMSKDPELKCFC

QTPETCLKKGLFDLFNCVKAPLVASLPHLYLVDESYLEQVDGLHPNKDEHGIFLEFEPMTGSPLSARKRLQFNMFIHPVEKFKLLKTAPTALLPLFWVEEGILLGDDIIGQLKT

LFKVMSIMTILKWTMTLLGIGLIGGAGGLYYKDSQASQKLEITKISPNSLTNGNKNWPLDVNGLQSNTVPPALDG

>AmelSNMP1

MRFKKLIHDITTRFFHRGVHVILHSSFVKLQSFVTTGRKLHETLRVPVGRKCVTMKPKKLGIIGGSLLAFGILICAIAFPPFLRSQVKKQIALKDGSEMRELWSNFPVPLDFKI

YLFNVTNPMEITAGEKPILEEVGPFFYDEYKQKVDLVDREEDDSLEYNLKATWFFNPSRSEGLTGEEELIVPHVLILSMIKLTLEQQPAAMGILNKAVDNIFKKPESVFVRAK

AREILFDGLPVDCTGKDFASSAICSVLKEKDDALIADGPGRYLFSLFGPKNGTVLPERIRVLRGIKNYKDVGKVTEVNGKTKLDIWGEGDCNEFNGTDSTIFAPLLTEQDDIV

SFAPDICRSMGARFDSYTKVKGINTYHYKADLGDMSSHPEEKCFCPSPDSCLTKNLMDLTKCVGAPLIASLPHLLGAEEKYLKMVDGLHPNEEEHGIAMDFEPMTATPLSA

HKRLQFNLYLHKVAKFKLMKNFPECLFPIFWVEEGILLGDEFVKKLKTVFKTISIVGFMKWFTIVSGTCVSGAAAALFFKNKDKNKLDITKVTPQKGEEKKWPNQMTISTIQ

SAAVPPNLDAD

>AmelSNMP2

MWSYQVCAIICVIFGIYACITNLFSDGLFSIKNAILKNLPLIKGKDMYDEWILPVNLIFKCYFFNVTNPDEVMEGNNPNLVEYGPFTYREVFEKQIVDVDEELDEIIYDVKSTF

TFDKYASLNISKRDTVTILNPAYIGTISMASIIGLTTLPPSYIEKFGNNIPKLFPNRSSIFLKANPKEILFDGVKLTCNERKFPELSTICKTLKALRSPVLKEGEKEGVYYLSIFQRV

NGTIRGRFSVNRGVNNISELGNIGSYNGRRVQTIWRTEKCNTVRGSDTITWAPLINPMPSVLSFIPDLCRSIEADYDKEVSIYGLIGSRFVMRERTWFLNQSQCYCLERNKVP

NCLPQGLIDVSDCLVMLRYVMLQKVPIIMSEPHFLHGDPQLLMYALGLNPSEDLHETFIVIEPYTGTPLSGQKKIQLNLKLERQPVDLLSNISEGYFPLLWCANVRIFSKIIKLQ

Y

>BimpSNMP1

MRLKPLAHDFAARVFRRGVKVTWYSSLLGLLSFLTTGRKLHETLRAPTGHKRVTMIKPKKLGIIGGSLFA

FGVVFCAIVFPPFLKWKIKNQVTLKPDTEMRELWSTFPVPLDFKIYLFNVTNPTEITAGEKPILEEVGPF

FYDEYKHKVNMVDREEDDSLEYNLKATWFYNPSLSSPLTGEEELVFPHVLILSMVKLTLEQQPAAIGILN

KAVDNIFKKPSSVFVRAKAREILFDGVPLDCTGKDFASSAICNVLKEREDALLPDGPGRYLFSLFGPKNG

TVLPDRIRVLRGVKYWKDVGKVTEVNGKPELDIWTEDHCNEFNGTDSTIFAPLLTEQDDIVSYSPDICRS

LSARFDHKTKVAGINTYHYKADLGDMSTNPEEKCFCPAPDNCLTKNLMDLTKCVGVPLIASLPHLLGSEE

KYLEMVDGLHPDEEKHGINMDFEPMTATPLIARKRLQFNMFLNKVEKFKLMKNFPECLFPFFWVEEGIEL

GGEFLAKLKMVFKMISIIGFMKWLTIISGACVSGAAAAIFFKNKDKGSLDVTKVTPQSQNGKNEDEKKWP NQMTISTIQSAAVPPNLDAN

>BimpSNMP2

MSPNNRQTDNFKEKVRSNFYKMWCYYGCAIIWIIFGLYVSQTELFSNKLISKITEALSLREDSKIYKAWK

SPMQLTFTCHFFNVTNPDEVMSGSNPYFNEVGPFTYDEILEKQIIDVDDAMDEITYTTKSMYSFNKDLSV

KLSEHDKITILNPAYIGTMSMLSSLPAGYIEKYGNNIPKLFPNRSSIFLKANPNDLLFNGIKVSCDLRKF

PELDVICKTLGSNLPQVLRKTDKQDVYLLSIFQRINATFRGPFSVNRGVNDIMRLGDITSYMGKRKQKIW

NSEDCNIIRGTDSIIWAPLIKPLPFVSTFIPDLFNIPYQLSRCMCRTIEADYKDEISVRGLIGSRFVMKE

RTWFLNTTQCYCLLENKIPKCLPQGLIDVWECQKLPVILSEPHFLHGDPQLLKYAGGLNPDDRLHETYII

IEPYTGTPLSGQKRMQLNLYLGKQSVELLSNVSEGYFPLIWCGNRMW

>FariSNMP1

MQRWLKLGIAGCCLFIFGIVFGFVIFPLLVKSQVKAQVNLKPGTEMREMWEKTPFPIDFRIFLFNITNPD

EIIAGAKPIVNEVGPFFYDEYKEKVEVTDVEKDDTSEYSNKITWQFSPEKSGMGLSEDTVLTFPHVMILN

MILAVMREQPGTISFATKAVDSIFHKPNSVFIRTTVREILWTGLPLDCTVQDFQGKSACLLLAEKEAAFI

KDGPGKYRFALFGAKNATTVKDRIKVRRGLQNYLQVGEMVEFKGEKVQEIWGEEGSCNNLTGTDSSIFHP

LLYEDEDMISFSVDMCLTVPARYVKPSNVQGVPTNHYVADYGDMNKDEHLKCLCPAPDKCLKKGLIDLFP

CIGAPLVASLPHLYLVDDFYLTQVDGLHPEKEEHQIFINLEPMTGSPVEARKRLQFNMFIRPVEKFPLMK

TFPQALLPLFWVEEGLLLGDKYVNQLKTVYTLISIVGIIKWLLILGGLVLIGTAGYLRRRIKKGSKIDIT

TISPQFTATALNSIDKKQSDLNTSQSAPADS

>FariSNMP2

MSSIKLNICFGFFLGLGIVVAILALVSKFIVFPKIINNEIAEEIQLINGSEAYDRWVKIPFPIIYKAYFF

NVTNPEAVSQGEKPILQEVGPYIYQQHRAKLNITDRLETLGYNEHQLFEFDAKASYPLTDSDPIRIVNLP

LMGLIDTTERETPALVRFLDLIIPQLFDNPKNLFLTTTPKDFLFDGIFLNCQSNNVLLRIFCKSIEKLAP

RTMVRQEDGNIKFSFLSYKNNTDEGRFVVNSGRIEPERVGQLSSWNGYNLTNIWLTNSSCNRIFGTDATI

YPPFDSTDSILDTFSIDLCRTVSLEYSEPIVYSGIDGLRFVAKKSTFLSPGQEPLNQCYCLHKTKGILGQ

DGCLLDGALELFSCHGAPIVFTHPHFYLTHQTYQNGVIGLKPNSIKHQNFVDLQPNTGAPLRGSKRGQFN

IFLRSVDGVSLTSGLRTTLMPILWFDEGVVLSDKYVDILKVDFLDKMRFIEIGGWAIFACGTATCILSFV

VFISCRCAKKNS

>MdemSNMP1

MKEMWVKVPFPVDFRIYLFNITNANEIKTGAKPIVQQVGPFFYDEWKEKVDLVDREEDDTVEYKNKATWV

FNQAKSAPGLTEDVVLVFPHVMILSMILATVREKPAMVGLAAKAVDSIFHKPDSVFVTATAREILWTGLP

VDCSVKDFAGSAVCGILREDDSGFLKDGENYKFALFGAKNGTVIPDTIRVHRGKRNYLEVGIVTEFKGEP

KLNVWPEEGDCNTFNGTDSTIFHPFLYQDEDVVSFAPDLCRSLGARYQRPSKVKGIKTNRYTATLGDMST

DPALKCFCPTPDTCLGKGLYDIFPCVKAPLVGSLPHFYDTDPQYLTQVDGLHPNEEDHQIFIDFEPMLGA

PLSARKRLQFNIFIMPVEKFKLMKTFPNALLPLFWVEEGLLLDDEYLKPIKMVFTMLKIVGIMKWLMMTA

GVGLGGGAGFLFWKSTQSPQKLDITKVSPKTIQNAGGDEKKWPTTVSTIQGNNGPPSVEA

>MdemSNMP2

MNYCRTGFRNFLSYVPGLLLISLGIYLATEKPHTNYVIDQIRKEAELTEGKYGYRMWKDLDIYFKVYLLH

VTNPDNVMEGENPIFEERGPYVYNLNMKKQVTHVDEKLDELAFTIFRTYQFNKNASGSFSEDDQVVLLNS

AYLGTLNTIVSKFPAFIGRFGNSIQNLFPKTYDVFLRSKVKDILFDGLPLICDPVKYKDLALLCNFLKGQ

KPPIIKNTDKPGVYSYSLFDKNNYTDSDPFTVNRGVENKDALGNTTSFKKLRVTKYWTEKECNLVSGTDS

ITWAPMTEKLPFVSVYEPNVCRRMTPNFKREVIINGLMGYRYELDETTWLKKNMGCYCLPNAKKVPECLQ

TGLLDITKCQVTLLFIYITRDAPVIFSEPHFLHADPNLLEYARGLKPDPIEHTTFITIEPLSGAPLSGSK

KIQLNLNVKRIPGITLLANISEGLFPILWAEEVFYLFIFINKQLSQ

>MpulSNMP1

MKLFMKLGIAGGAMFAFGILIGFIIFPPFLKSQVKKQSSLKAGSELREMWTTLPFPLDFKVYLFNVTNPE

EIAAGAKPIVKEVGPFFYDEYKNKVNLVDDEEDDTVEFSFQKTWYFNQAKSGPGLTEYTEIIFPHMLILG

AVMTTLRTQPTMVGAVGKALDSVLHKPESVFMKTTPRELLWEGMLIDCTVKDGAGKALCKELRKDDSGLL

KEGENYRIALFGHQNGTASRDRIKVKRGLKQILDVGVVQTFNNKTKLDTWVEKGNCNTLNGTDSTIFHPF

LYDNEDIVSFSSDICRSVSARFQQKSSVGGIKTNRYTASLGDMSKDPEIKCLCPTEDTCLKKGLMDLFNC

VKAPIVASLPHLYQVEKEYLSQVDGLHPNEHEHELFIEFEPFTGSPLSARNRLQFNMFIQNVTKFKLMKT

FPSALMPLFWIEEGILLGDDILSQIKMVFTLMSVVSGMKWTMITLGLGLGGAAGGLFYKAQQNSQKLDIT

KIVTKSSQNGGEKQWPVNISTVQGATAQPHLDS

>MrotSNMP1

MKPKTLGIVGGSMLSFGILICSIIFPAFLKSQIKKQVALKPGSEMREMWTSFPLPLDFKIYMFNVTNPTE ILGGAKPIVEEVGPFFYDEYKHKVNLEDREEDDSVSYNFKTTWYWNPSKSNGLTGEEELVVPHLFIISMI

KLTLMEQPSAIGIVNKAIDSIFKKPGTVFVRAKAKDILFNGLPIDCTVKDFAGAATCNVLSQKAEESGLI

SDGEGHYLFSIFGSKNGSVVPERLRVLRGMKNWKDVGRVIEYDDKPALTTWPEEHCNQYNGTDTTIFAPF

LEEGGDIVSFAPDLCRSLGAHYSHKSVVKGVHTYHYTADLGDMSKNEDEKCFCPTPDTCLTKNLMDLYKC

IGAPLIASLPHLFGSEKKYHEMVDGLHPNEEAHGIGMDFEPTTATPLLAAKRLQFNVFLHPMEKVKLMKN

FPECLFPLFWVEEGILLDDEYVKIVKKLFMIKGIVGFLKYLTIFVGTCASGAAGALYFKNKDKNKLDITK

VTPQSQKENDDEKKWPPQMNISTIQSATVPPNLDN

>MrotSNMP2

MSNLYLMIFQIFIGISLICLGSYFVSENVLETLVVKFVQKFSLPLIKGSPHYEIWSKPTSINFSCYLFNV

TNPDEVMRGENPHLVEYGPFTYTEVQEKFISYIDKEMDEIKYTTKSTYTFDRYQSLNFSKQDKIIILNPA

YIGTIETLAALPDDFMKKYGNSIPKLFPNRSSIFLKARPTDVLFDGVKITCNPKKFPELQLICETLKLKQ

PPVLREGEKENVYYLSFFQRLNNTSRGPFTVSRGVKDITKLGDITSYLGYRVQEVFATDLCNTVRGSDTI

TWAPLMKPLPKVSTFIQDICRTVEIDYENEVVLNGMIGSQFVMHERVWYLNESECYCPLVDKQPVCPRRG

LIDAYQCQKVPVFVSEPHFLHGDPELLNYARGLTPNEVLHKTYVVIEPYTGIPLAGEKKTQLNLKLARRP

VNLLANISEGYFPLLWFENGNKLTPFDQVLYPYQLLRYLHFMRYLQYIPLIIGIYLISISLLFYGDTSRR

VHPNATNVQSILISNSRLNRPPQRQVVW

>MmedSNMP1

MLLFKKLGIAGGSVFTLGIIIGYAFFPPFLKSQIKKGIQLVDGSDMKEMWVKVPFPLDFRIYLFNITNANEIKAGAKPIVQQVGPFFYEEWKEKVDLVDREEDDTVEYKNKAT

WVFNQAKSAPGLTEDVVLVFPHVMILSMILATVREKPAMVGLAAKAVDSIFHKPDSVFVTATAREILWTGLPVDCSVKDFAGSAVCGILREDDSGFLKDGENYKFALFGAK

NGTVIPDTIRVHRGKRNYLEVGIVTEFKGEPKLNVWPEEGDCNTFNGTDSTIFHPFLYEDEDVVSFAPDLCRSLSAIYQKPTKVKGIKTNRYIASLGDMSTDPTLKCLCPTPD

TCLGKGLYDIFPCVKAPLVCSLPHFYDTDPQYLTQVDGLHPNEEDHQIFIDFEPMLGAPLSARKRLQFNIFIMPVDKFKLMKTFPNALLPLFWVEEGLILDDEYLKPIKLVFT

MLKVVGIMKWLMMTAGVGLGGGAGFLFWKSTQSPQKLDITKVSPKTIQNAAGDEKKWPTSVSTIQGNNAPPSVEA

>MmedSNMP2

MTSCSTRFRNFMSYVPGLLLISLGIYLATEKPHTNYLINHIREAAELVEGKYGYEIWKDLDIYFKVRLYHITNPDSVMEGENPIIEERGPYVYNLNMKKRVTNVDEKLDEMA
[truncated: 9,574 more chars]
